# Supplementary material for: Predicted HLA Class I and Class II Epitopes From Licensed Vaccines Are Largely Conserved in New SARS-CoV-2 Omicron Variant of Concern
Source: PubMed Central journal article supplement (PMC8831693; doi:10.3389/fimmu.2022.832889), 2022-01-28
Supplement: DataSheet_1.pdf [file DataSheet_1.pdf]

| Supertype | Allele      | Begin position | Sequence     | Score (EL) |
|-----------|-------------|----------------|--------------|------------|
| A01       | HLA-A*01:01 | 28             | YTNSFTRGVY   | 0,8696     |
| A01       | HLA-A*01:01 | 28             | YTNSFTRGVYY  | 0,9035     |
| A01       | HLA-A*01:01 | 135            | FCNDPFLGVY   | 0,6253     |
| A01       | HLA-A*01:01 | 136            | CNDPFLGVY    | 0,6408     |
| A01       | HLA-A*01:01 | 136            | CNDPFLGVYY   | 0,6059     |
| A01       | HLA-A*01:01 | 160            | YSSANNCTFEY  | 0,7273     |
| A01       | HLA-A*01:01 | 161            | SSANNCTFEY   | 0,7703     |
| A01       | HLA-A*01:01 | 162            | SANNCTFEY    | 0,6674     |
| A01       | HLA-A*01:01 | 256            | SGWTAGAAAYY  | 0,7466     |
| A01       | HLA-A*01:01 | 257            | GWTAGAAAYY   | 0,7407     |
| A01       | HLA-A*01:01 | 258            | WTAGAAAYY    | 0,9622     |
| A01       | HLA-A*01:01 | 358            | ISNCVADYSVLY | 0,7628     |
| A01       | HLA-A*01:01 | 361            | CVADYSVLY    | 0,8233     |
| A01       | HLA-A*01:01 | 362            | VADYSVLY     | 0,8361     |
| A01       | HLA-A*01:01 | 370            | NSASFSTFKCY  | 0,5177     |
| A01       | HLA-A*01:01 | 440            | NLDSKVGNGY   | 0,893      |
| A01       | HLA-A*01:01 | 603            | NTSNQVAVLY   | 0,8721     |
| A01       | HLA-A*01:01 | 604            | TSNQVAVLY    | 0,9585     |
| A01       | HLA-A*01:01 | 746            | STECSNLLLQY  | 0,8875     |
| A01       | HLA-A*01:01 | 828            | LADAGFIKQY   | 0,928      |
| A01       | HLA-A*01:01 | 863            | PLLTDEMIAQY  | 0,8726     |
| A01       | HLA-A*01:01 | 865            | LTDEMIAQY    | 0,9987     |
| A01       | HLA-A*01:01 | 866            | TDEMIAQY     | 0,8997     |
| A01       | HLA-A*01:01 | 1197           | LIDLQELGKY   | 0,9031     |
| A01       | HLA-A*01:03 | 28             | YTNSFTRGVY   | 0,8142     |
| A01       | HLA-A*01:03 | 28             | YTNSFTRGVYY  | 0,8662     |
| A01       | HLA-A*01:03 | 160            | YSSANNCTFEY  | 0,6327     |
| A01       | HLA-A*01:03 | 161            | SSANNCTFEY   | 0,6876     |
| A01       | HLA-A*01:03 | 258            | WTAGAAAYY    | 0,9493     |
| A01       | HLA-A*01:03 | 358            | ISNCVADYSVLY | 0,6647     |
| A01       | HLA-A*01:03 | 361            | CVADYSVLY    | 0,7732     |
| A01       | HLA-A*01:03 | 603            | NTSNQVAVLY   | 0,8133     |
| A01       | HLA-A*01:03 | 604            | TSNQVAVLY    | 0,9385     |
| A01       | HLA-A*01:03 | 746            | STECSNLLLQY  | 0,8277     |
| A01       | HLA-A*01:03 | 828            | LADAGFIKQY   | 0,8857     |
| A01       | HLA-A*01:03 | 863            | PLLTDEMIAQY  | 0,7915     |
| A01       | HLA-A*01:03 | 865            | LTDEMIAQY    | 0,9982     |
| A01       | HLA-A*01:03 | 1197           | LIDLQELGKY   | 0,8476     |
| A01       | HLA-A*01:06 | 28             | YTNSFTRGVY   | 0,7602     |
| A01       | HLA-A*01:06 | 28             | YTNSFTRGVYY  | 0,7892     |
| A01       | HLA-A*01:06 | 29             | TNSFTRGVYY   | 0,5721     |
| A01       | HLA-A*01:06 | 30             | NSFTRGVYY    | 0,8159     |
| A01       | HLA-A*01:06 | 160            | YSSANNCTFEY  | 0,5052     |
| A01       | HLA-A*01:06 | 161            | SSANNCTFEY   | 0,7022     |
| A01       | HLA-A*01:06 | 162            | SANNCTFEY    | 0,6641     |
| A01       | HLA-A*01:06 | 256            | SGWTAGAAAYY  | 0,6894     |
| A01       | HLA-A*01:06 | 257            | GWTAGAAAYY   | 0,7487     |
| A01       | HLA-A*01:06 | 258            | WTAGAAAYY    | 0,9282     |
| A01       | HLA-A*01:06 | 358            | ISNCVADYSVLY | 0,607      |

|     |             |      |              |        |
|-----|-------------|------|--------------|--------|
| A01 | HLA-A*01:06 | 359  | SNCVADYSVLY  | 0,5742 |
| A01 | HLA-A*01:06 | 360  | NCVADYSVLY   | 0,6328 |
| A01 | HLA-A*01:06 | 361  | CVADYSVLY    | 0,8242 |
| A01 | HLA-A*01:06 | 601  | GTNTSNQVAVLY | 0,5577 |
| A01 | HLA-A*01:06 | 603  | NTSNQVAVLY   | 0,7856 |
| A01 | HLA-A*01:06 | 604  | TSNQVAVLY    | 0,9241 |
| A01 | HLA-A*01:06 | 733  | KTSVDCTMY    | 0,6247 |
| A01 | HLA-A*01:06 | 746  | STECNLLLQY   | 0,5958 |
| A01 | HLA-A*01:06 | 828  | LADAGFIKQY   | 0,7349 |
| A01 | HLA-A*01:06 | 865  | LTDEMIAQY    | 0,9873 |
| A01 | HLA-A*01:06 | 1197 | LIDLQELGKY   | 0,6364 |
| A01 | HLA-A*01:07 | 28   | YTNSFTRGVY   | 0,7994 |
| A01 | HLA-A*01:07 | 28   | YTNSFTRGVYY  | 0,7935 |
| A01 | HLA-A*01:07 | 135  | FCNDPFLGVY   | 0,5269 |
| A01 | HLA-A*01:07 | 136  | CNDPFLGVY    | 0,5497 |
| A01 | HLA-A*01:07 | 136  | CNDPFLGVYY   | 0,5021 |
| A01 | HLA-A*01:07 | 160  | YSSANNCTFEY  | 0,6031 |
| A01 | HLA-A*01:07 | 161  | SSANNCTFEY   | 0,7204 |
| A01 | HLA-A*01:07 | 162  | SANNCTFEY    | 0,6395 |
| A01 | HLA-A*01:07 | 256  | SGWTAGAAAYY  | 0,6935 |
| A01 | HLA-A*01:07 | 257  | GWTAGAAAYY   | 0,7199 |
| A01 | HLA-A*01:07 | 258  | WTAGAAAYY    | 0,9322 |
| A01 | HLA-A*01:07 | 358  | ISNCVADYSVLY | 0,6325 |
| A01 | HLA-A*01:07 | 361  | CVADYSVLY    | 0,7815 |
| A01 | HLA-A*01:07 | 440  | NLDSKVGGNY   | 0,8818 |
| A01 | HLA-A*01:07 | 603  | NTSNQVAVLY   | 0,8153 |
| A01 | HLA-A*01:07 | 604  | TSNQVAVLY    | 0,9147 |
| A01 | HLA-A*01:07 | 746  | STECNLLLQY   | 0,728  |
| A01 | HLA-A*01:07 | 828  | LADAGFIKQY   | 0,8525 |
| A01 | HLA-A*01:07 | 863  | PLLTDEMIAQY  | 0,7608 |
| A01 | HLA-A*01:07 | 865  | LTDEMIAQY    | 0,9944 |
| A01 | HLA-A*01:07 | 1197 | LIDLQELGKY   | 0,8505 |
| A01 | HLA-A*01:08 | 28   | YTNSFTRGVY   | 0,8357 |
| A01 | HLA-A*01:08 | 28   | YTNSFTRGVYY  | 0,8794 |
| A01 | HLA-A*01:08 | 135  | FCNDPFLGVY   | 0,5792 |
| A01 | HLA-A*01:08 | 136  | CNDPFLGVY    | 0,5738 |
| A01 | HLA-A*01:08 | 136  | CNDPFLGVYY   | 0,5287 |
| A01 | HLA-A*01:08 | 160  | YSSANNCTFEY  | 0,71   |
| A01 | HLA-A*01:08 | 161  | SSANNCTFEY   | 0,7846 |
| A01 | HLA-A*01:08 | 162  | SANNCTFEY    | 0,6944 |
| A01 | HLA-A*01:08 | 254  | SSSGWTAGAAAY | 0,5093 |
| A01 | HLA-A*01:08 | 256  | SGWTAGAAAYY  | 0,748  |
| A01 | HLA-A*01:08 | 257  | GWTAGAAAYY   | 0,7602 |
| A01 | HLA-A*01:08 | 258  | WTAGAAAYY    | 0,9628 |
| A01 | HLA-A*01:08 | 358  | ISNCVADYSVLY | 0,7216 |
| A01 | HLA-A*01:08 | 361  | CVADYSVLY    | 0,8161 |
| A01 | HLA-A*01:08 | 362  | VADYSVLY     | 0,7907 |
| A01 | HLA-A*01:08 | 603  | NTSNQVAVLY   | 0,8442 |
| A01 | HLA-A*01:08 | 604  | TSNQVAVLY    | 0,9539 |
| A01 | HLA-A*01:08 | 697  | MSLGAENSVAY  | 0,5924 |

|     |             |      |              |        |
|-----|-------------|------|--------------|--------|
| A01 | HLA-A*01:08 | 733  | KTSVDCTMY    | 0,6742 |
| A01 | HLA-A*01:08 | 746  | STECNLLLQY   | 0,8198 |
| A01 | HLA-A*01:08 | 828  | LADAGFIKQY   | 0,9    |
| A01 | HLA-A*01:08 | 863  | PLLTDEMIAQY  | 0,7815 |
| A01 | HLA-A*01:08 | 865  | LTDEMIAQY    | 0,9976 |
| A01 | HLA-A*01:08 | 866  | TDEMIAQY     | 0,8381 |
| A01 | HLA-A*01:08 | 1197 | LIDLQELGKY   | 0,8632 |
| A01 | HLA-A*01:09 | 28   | YTNSFTRGVY   | 0,8696 |
| A01 | HLA-A*01:09 | 28   | YTNSFTRGVYY  | 0,9035 |
| A01 | HLA-A*01:09 | 135  | FCNDPFLGVY   | 0,6253 |
| A01 | HLA-A*01:09 | 136  | CNDPFLGVY    | 0,6408 |
| A01 | HLA-A*01:09 | 136  | CNDPFLGVYY   | 0,6059 |
| A01 | HLA-A*01:09 | 160  | YSSANNCTFEY  | 0,7273 |
| A01 | HLA-A*01:09 | 161  | SSANNCTFEY   | 0,7703 |
| A01 | HLA-A*01:09 | 162  | SANNCTFEY    | 0,6674 |
| A01 | HLA-A*01:09 | 256  | SGWTAGAAAYY  | 0,7466 |
| A01 | HLA-A*01:09 | 257  | GWTAGAAAYY   | 0,7407 |
| A01 | HLA-A*01:09 | 258  | WTAGAAAYY    | 0,9622 |
| A01 | HLA-A*01:09 | 358  | ISNCVADYSVLY | 0,7628 |
| A01 | HLA-A*01:09 | 361  | CVADYSVLY    | 0,8233 |
| A01 | HLA-A*01:09 | 362  | VADYSVLY     | 0,8361 |
| A01 | HLA-A*01:09 | 370  | NSASFSTFKCY  | 0,5177 |
| A01 | HLA-A*01:09 | 440  | NLDSKVG GNY  | 0,893  |
| A01 | HLA-A*01:09 | 603  | NTSNQVAVLY   | 0,8721 |
| A01 | HLA-A*01:09 | 604  | TSNQVAVLY    | 0,9585 |
| A01 | HLA-A*01:09 | 746  | STECNLLLQY   | 0,8875 |
| A01 | HLA-A*01:09 | 828  | LADAGFIKQY   | 0,928  |
| A01 | HLA-A*01:09 | 863  | PLLTDEMIAQY  | 0,8726 |
| A01 | HLA-A*01:09 | 865  | LTDEMIAQY    | 0,9987 |
| A01 | HLA-A*01:09 | 866  | TDEMIAQY     | 0,8997 |
| A01 | HLA-A*01:09 | 1197 | LIDLQELGKY   | 0,9031 |
| A01 | HLA-A*01:10 | 28   | YTNSFTRGVY   | 0,8782 |
| A01 | HLA-A*01:10 | 28   | YTNSFTRGVYY  | 0,8568 |
| A01 | HLA-A*01:10 | 135  | FCNDPFLGVY   | 0,5464 |
| A01 | HLA-A*01:10 | 136  | CNDPFLGVY    | 0,55   |
| A01 | HLA-A*01:10 | 160  | YSSANNCTFEY  | 0,617  |
| A01 | HLA-A*01:10 | 161  | SSANNCTFEY   | 0,7739 |
| A01 | HLA-A*01:10 | 162  | SANNCTFEY    | 0,7209 |
| A01 | HLA-A*01:10 | 254  | SSSGWTAGAAAY | 0,5306 |
| A01 | HLA-A*01:10 | 256  | SGWTAGAAAYY  | 0,7805 |
| A01 | HLA-A*01:10 | 257  | GWTAGAAAYY   | 0,801  |
| A01 | HLA-A*01:10 | 258  | WTAGAAAYY    | 0,9558 |
| A01 | HLA-A*01:10 | 269  | YLQPRTFLLKY  | 0,5653 |
| A01 | HLA-A*01:10 | 358  | ISNCVADYSVLY | 0,7038 |
| A01 | HLA-A*01:10 | 361  | CVADYSVLY    | 0,8467 |
| A01 | HLA-A*01:10 | 362  | VADYSVLY     | 0,7818 |
| A01 | HLA-A*01:10 | 414  | QTGKIADYNY   | 0,7033 |
| A01 | HLA-A*01:10 | 440  | NLDSKVG GNY  | 0,8551 |
| A01 | HLA-A*01:10 | 601  | GTNTSNQVAVLY | 0,6737 |
| A01 | HLA-A*01:10 | 603  | NTSNQVAVLY   | 0,8545 |

|     |             |      |              |        |
|-----|-------------|------|--------------|--------|
| A01 | HLA-A*01:10 | 604  | TSNQVAVLY    | 0,9462 |
| A01 | HLA-A*01:10 | 733  | KTSVDCTMY    | 0,7195 |
| A01 | HLA-A*01:10 | 746  | STECNLLLQY   | 0,8093 |
| A01 | HLA-A*01:10 | 828  | LADAGFIKQY   | 0,8825 |
| A01 | HLA-A*01:10 | 863  | PLLTDEMIAQY  | 0,6841 |
| A01 | HLA-A*01:10 | 865  | LTDEMIAQY    | 0,996  |
| A01 | HLA-A*01:10 | 1039 | RVDFCGKGY    | 0,8273 |
| A01 | HLA-A*01:10 | 1197 | LIDLQELGKY   | 0,875  |
| A01 | HLA-A*01:12 | 28   | YTNSFTRGVY   | 0,5329 |
| A01 | HLA-A*01:12 | 28   | YTNSFTRGVYY  | 0,528  |
| A01 | HLA-A*01:12 | 161  | SSANNCTFEY   | 0,5055 |
| A01 | HLA-A*01:12 | 162  | SANNCTFEY    | 0,5654 |
| A01 | HLA-A*01:12 | 258  | WTAGAAAYY    | 0,8102 |
| A01 | HLA-A*01:12 | 361  | CVADYSVLY    | 0,7278 |
| A01 | HLA-A*01:12 | 444  | KVGGNYNYLY   | 0,594  |
| A01 | HLA-A*01:12 | 603  | NTSNQVAVLY   | 0,5927 |
| A01 | HLA-A*01:12 | 604  | TSNQVAVLY    | 0,7812 |
| A01 | HLA-A*01:12 | 865  | LTDEMIAQY    | 0,9207 |
| A01 | HLA-A*01:14 | 28   | YTNSFTRGVY   | 0,8208 |
| A01 | HLA-A*01:14 | 28   | YTNSFTRGVYY  | 0,8729 |
| A01 | HLA-A*01:14 | 135  | FCNDPFLGVY   | 0,6119 |
| A01 | HLA-A*01:14 | 136  | CNDPFLGVY    | 0,6715 |
| A01 | HLA-A*01:14 | 136  | CNDPFLGVYY   | 0,6088 |
| A01 | HLA-A*01:14 | 160  | YSSANNCTFEY  | 0,663  |
| A01 | HLA-A*01:14 | 161  | SSANNCTFEY   | 0,7519 |
| A01 | HLA-A*01:14 | 162  | SANNCTFEY    | 0,6665 |
| A01 | HLA-A*01:14 | 256  | SGWTAGAAAYY  | 0,6944 |
| A01 | HLA-A*01:14 | 257  | GWTAGAAAYY   | 0,7187 |
| A01 | HLA-A*01:14 | 258  | WTAGAAAYY    | 0,9506 |
| A01 | HLA-A*01:14 | 269  | YLQPRTFLLKY  | 0,5565 |
| A01 | HLA-A*01:14 | 358  | ISNCVADYSVLY | 0,7087 |
| A01 | HLA-A*01:14 | 361  | CVADYSVLY    | 0,8057 |
| A01 | HLA-A*01:14 | 362  | VADYSVLY     | 0,7998 |
| A01 | HLA-A*01:14 | 601  | GTNTSNQVAVLY | 0,6797 |
| A01 | HLA-A*01:14 | 603  | NTSNQVAVLY   | 0,8237 |
| A01 | HLA-A*01:14 | 604  | TSNQVAVLY    | 0,9452 |
| A01 | HLA-A*01:14 | 733  | KTSVDCTMY    | 0,7034 |
| A01 | HLA-A*01:14 | 746  | STECNLLLQY   | 0,8081 |
| A01 | HLA-A*01:14 | 828  | LADAGFIKQY   | 0,8737 |
| A01 | HLA-A*01:14 | 863  | PLLTDEMIAQY  | 0,7423 |
| A01 | HLA-A*01:14 | 865  | LTDEMIAQY    | 0,9971 |
| A01 | HLA-A*01:14 | 1039 | RVDFCGKGY    | 0,8252 |
| A01 | HLA-A*01:14 | 1197 | LIDLQELGKY   | 0,8561 |
| A01 | HLA-A*26:01 | 28   | YTNSFTRGVY   | 0,5472 |
| A01 | HLA-A*26:01 | 191  | EFVFNIDGY    | 0,8157 |
| A01 | HLA-A*26:01 | 192  | FVFNIDGY     | 0,9119 |
| A01 | HLA-A*26:01 | 258  | WTAGAAAYY    | 0,9338 |
| A01 | HLA-A*26:01 | 340  | EVFNATRFASVY | 0,6393 |
| A01 | HLA-A*26:01 | 360  | NCVADYSVLY   | 0,7886 |
| A01 | HLA-A*26:01 | 361  | CVADYSVLY    | 0,8578 |

|     |             |      |                  |        |
|-----|-------------|------|------------------|--------|
| A01 | HLA-A*26:01 | 603  | NTSNQVAVLY       | 0,5793 |
| A01 | HLA-A*26:01 | 686  | SVASQSIIAY       | 0,6831 |
| A01 | HLA-A*26:01 | 780  | EVFAQVKQIY       | 0,7706 |
| A01 | HLA-A*26:01 | 1095 | FVSNNGTHWF       | 0,5675 |
| A01 | HLA-A*26:02 | 28   | YTNSFTRGVY       | 0,7649 |
| A01 | HLA-A*26:02 | 30   | NSFTRGVYY        | 0,7196 |
| A01 | HLA-A*26:02 | 50   | STQDLFLPF        | 0,7114 |
| A01 | HLA-A*26:02 | 125  | NVVIKVECF        | 0,6379 |
| A01 | HLA-A*26:02 | 191  | EFVFKNIDGY       | 0,9206 |
| A01 | HLA-A*26:02 | 192  | FVFKNIDGY        | 0,9721 |
| A01 | HLA-A*26:02 | 192  | FVFKNIDGYF       | 0,7022 |
| A01 | HLA-A*26:02 | 215  | <b>DLPQGFSAL</b> | 0,5481 |
| A01 | HLA-A*26:02 | 256  | SGWTAGAAAYY      | 0,5903 |
| A01 | HLA-A*26:02 | 257  | GWTAGAAAYY       | 0,6462 |
| A01 | HLA-A*26:02 | 258  | WTAGAAAY         | 0,5731 |
| A01 | HLA-A*26:02 | 258  | WTAGAAAYY        | 0,9678 |
| A01 | HLA-A*26:02 | 261  | GAAAYYVGY        | 0,6857 |
| A01 | HLA-A*26:02 | 298  | ETKCTLKSF        | 0,7757 |
| A01 | HLA-A*26:02 | 340  | EVFNATRF         | 0,5818 |
| A01 | HLA-A*26:02 | 340  | EVFNATRFASVY     | 0,834  |
| A01 | HLA-A*26:02 | 343  | NATRFASVY        | 0,526  |
| A01 | HLA-A*26:02 | 359  | SNCVADYSVLY      | 0,6372 |
| A01 | HLA-A*26:02 | 360  | NCVADYSVLY       | 0,9187 |
| A01 | HLA-A*26:02 | 361  | CVADYSVLY        | 0,9515 |
| A01 | HLA-A*26:02 | 366  | SVLYNSASF        | 0,6928 |
| A01 | HLA-A*26:02 | 392  | FTNVYADSF        | 0,6269 |
| A01 | HLA-A*26:02 | 442  | <b>DSKVGGNYY</b> | 0,6561 |
| A01 | HLA-A*26:02 | 554  | ESNKKFLPF        | 0,6456 |
| A01 | HLA-A*26:02 | 568  | DIADTTDAV        | 0,5453 |
| A01 | HLA-A*26:02 | 583  | EILDITPCSF       | 0,8274 |
| A01 | HLA-A*26:02 | 603  | NTSNQVAVL        | 0,5594 |
| A01 | HLA-A*26:02 | 603  | NTSNQVAVLY       | 0,7784 |
| A01 | HLA-A*26:02 | 686  | SVASQSIIAY       | 0,8793 |
| A01 | HLA-A*26:02 | 691  | SIIAYTMSL        | 0,7185 |
| A01 | HLA-A*26:02 | 710  | NSIAIPTNF        | 0,7355 |
| A01 | HLA-A*26:02 | 718  | FTISVTTEI        | 0,7944 |
| A01 | HLA-A*26:02 | 780  | EVFAQVKQI        | 0,672  |
| A01 | HLA-A*26:02 | 780  | EVFAQVKQIY       | 0,8897 |
| A01 | HLA-A*26:02 | 865  | LTDEMIAQY        | 0,7697 |
| A01 | HLA-A*26:02 | 869  | MIAQYTSAL        | 0,7428 |
| A01 | HLA-A*26:02 | 880  | GTITSGWTF        | 0,5972 |
| A01 | HLA-A*26:02 | 886  | WTFGAGAAL        | 0,7617 |
| A01 | HLA-A*26:02 | 898  | FAMQMAYRF        | 0,5082 |
| A01 | HLA-A*26:02 | 940  | STASALGKL        | 0,6677 |
| A01 | HLA-A*26:02 | 962  | LVKQLSSNF        | 0,536  |
| A01 | HLA-A*26:02 | 1054 | QSAPHGVVF        | 0,6027 |
| A01 | HLA-A*26:02 | 1095 | FVSNNGTHWF       | 0,8644 |
| A01 | HLA-A*26:02 | 1113 | QIITDNTF         | 0,6231 |
| A01 | HLA-A*26:02 | 1168 | DISGINASV        | 0,5184 |
| A01 | HLA-A*26:02 | 1188 | EVAKNLNESL       | 0,5001 |

|     |             |      |              |        |
|-----|-------------|------|--------------|--------|
| A01 | HLA-A*26:03 | 192  | FVFKNIDGY    | 0,7319 |
| A01 | HLA-A*26:03 | 258  | WTAGAAAYY    | 0,746  |
| A01 | HLA-A*26:04 | 28   | YTNSFTRGVY   | 0,5132 |
| A01 | HLA-A*26:04 | 191  | EFVFKNIDGY   | 0,6376 |
| A01 | HLA-A*26:04 | 192  | FVFKNIDGY    | 0,853  |
| A01 | HLA-A*26:04 | 258  | WTAGAAAYY    | 0,8788 |
| A01 | HLA-A*26:04 | 360  | NCVADYSVLY   | 0,6391 |
| A01 | HLA-A*26:04 | 361  | CVADYSVLY    | 0,75   |
| A01 | HLA-A*26:04 | 686  | SVASQSIIAY   | 0,5849 |
| A01 | HLA-A*26:04 | 780  | EVFAQVKQIY   | 0,6193 |
| A01 | HLA-A*26:05 | 28   | YTNSFTRGVY   | 0,5354 |
| A01 | HLA-A*26:05 | 191  | EFVFKNIDGY   | 0,7735 |
| A01 | HLA-A*26:05 | 192  | FVFKNIDGY    | 0,8748 |
| A01 | HLA-A*26:05 | 258  | WTAGAAAYY    | 0,9178 |
| A01 | HLA-A*26:05 | 340  | EVFNATRFASVY | 0,5592 |
| A01 | HLA-A*26:05 | 360  | NCVADYSVLY   | 0,7308 |
| A01 | HLA-A*26:05 | 361  | CVADYSVLY    | 0,7925 |
| A01 | HLA-A*26:05 | 603  | NTSNQVAVLY   | 0,5637 |
| A01 | HLA-A*26:05 | 686  | SVASQSIIAY   | 0,6565 |
| A01 | HLA-A*26:05 | 780  | EVFAQVKQIY   | 0,7142 |
| A01 | HLA-A*26:06 | 192  | FVFKNIDGY    | 0,7319 |
| A01 | HLA-A*26:06 | 258  | WTAGAAAYY    | 0,746  |
| A01 | HLA-A*26:07 | 28   | YTNSFTRGVY   | 0,5921 |
| A01 | HLA-A*26:07 | 50   | STQDLFLPF    | 0,531  |
| A01 | HLA-A*26:07 | 192  | FVFKNIDGY    | 0,929  |
| A01 | HLA-A*26:07 | 257  | GWTAGAAAYY   | 0,6545 |
| A01 | HLA-A*26:07 | 258  | WTAGAAAYY    | 0,8842 |
| A01 | HLA-A*26:07 | 261  | GAAAYYVGY    | 0,7223 |
| A01 | HLA-A*26:07 | 360  | NCVADYSVLY   | 0,557  |
| A01 | HLA-A*26:07 | 361  | CVADYSVLY    | 0,7863 |
| A01 | HLA-A*26:07 | 366  | SVLYNSASF    | 0,546  |
| A01 | HLA-A*26:07 | 686  | SVASQSIIAY   | 0,7678 |
| A01 | HLA-A*26:07 | 691  | SIIAYTMSL    | 0,5743 |
| A01 | HLA-A*26:07 | 698  | SLGAENSVAY   | 0,5027 |
| A01 | HLA-A*26:07 | 718  | FTISVTTEI    | 0,5245 |
| A01 | HLA-A*26:07 | 864  | LLTDEMIAQY   | 0,554  |
| A01 | HLA-A*26:07 | 865  | LTDEMIAQY    | 0,7389 |
| A01 | HLA-A*26:07 | 880  | GTITSGWTF    | 0,6723 |
| A01 | HLA-A*26:07 | 976  | VLNDILSRL    | 0,5945 |
| A01 | HLA-A*26:07 | 1095 | FVSNNGTHWF   | 0,7015 |
| A01 | HLA-A*26:07 | 1196 | SLIDLQELGKY  | 0,516  |
| A01 | HLA-A*26:08 | 28   | YTNSFTRGVY   | 0,5682 |
| A01 | HLA-A*26:08 | 50   | STQDLFLPF    | 0,5601 |
| A01 | HLA-A*26:08 | 191  | EFVFKNIDGY   | 0,6318 |
| A01 | HLA-A*26:08 | 192  | FVFKNIDGY    | 0,8385 |
| A01 | HLA-A*26:08 | 258  | WTAGAAAYY    | 0,9025 |
| A01 | HLA-A*26:08 | 340  | EVFNATRFASVY | 0,5328 |
| A01 | HLA-A*26:08 | 360  | NCVADYSVLY   | 0,766  |
| A01 | HLA-A*26:08 | 361  | CVADYSVLY    | 0,819  |
| A01 | HLA-A*26:08 | 603  | NTSNQVAVLY   | 0,5863 |

|     |             |      |              |        |
|-----|-------------|------|--------------|--------|
| A01 | HLA-A*26:08 | 686  | SVASQSIAY    | 0,7121 |
| A01 | HLA-A*26:08 | 780  | EVFAQVKQIY   | 0,596  |
| A01 | HLA-A*26:08 | 865  | LTDEMIAQY    | 0,7329 |
| A01 | HLA-A*26:08 | 1095 | FVSNQTHWF    | 0,5998 |
| A01 | HLA-A*26:09 | 28   | YTNSFTRGVY   | 0,6479 |
| A01 | HLA-A*26:09 | 191  | EFVFKNIDGY   | 0,751  |
| A01 | HLA-A*26:09 | 192  | FVFKNIDGY    | 0,9239 |
| A01 | HLA-A*26:09 | 257  | GWTAGAAAYY   | 0,5288 |
| A01 | HLA-A*26:09 | 258  | WTAGAAAYY    | 0,9326 |
| A01 | HLA-A*26:09 | 298  | ETKCTLKSF    | 0,5067 |
| A01 | HLA-A*26:09 | 340  | EVFNATRFASVY | 0,6007 |
| A01 | HLA-A*26:09 | 360  | NCVADYSVLY   | 0,7668 |
| A01 | HLA-A*26:09 | 361  | CVADYSVLY    | 0,8649 |
| A01 | HLA-A*26:09 | 603  | NTSNQVAVLY   | 0,611  |
| A01 | HLA-A*26:09 | 686  | SVASQSIAY    | 0,7378 |
| A01 | HLA-A*26:09 | 780  | EVFAQVKQIY   | 0,7512 |
| A01 | HLA-A*26:09 | 1095 | FVSNQTHWF    | 0,6488 |
| A01 | HLA-A*26:10 | 28   | YTNSFTRGVY   | 0,5472 |
| A01 | HLA-A*26:10 | 191  | EFVFKNIDGY   | 0,8157 |
| A01 | HLA-A*26:10 | 192  | FVFKNIDGY    | 0,9119 |
| A01 | HLA-A*26:10 | 258  | WTAGAAAYY    | 0,9338 |
| A01 | HLA-A*26:10 | 340  | EVFNATRFASVY | 0,6393 |
| A01 | HLA-A*26:10 | 360  | NCVADYSVLY   | 0,7886 |
| A01 | HLA-A*26:10 | 361  | CVADYSVLY    | 0,8578 |
| A01 | HLA-A*26:10 | 603  | NTSNQVAVLY   | 0,5793 |
| A01 | HLA-A*26:10 | 686  | SVASQSIAY    | 0,6831 |
| A01 | HLA-A*26:10 | 780  | EVFAQVKQIY   | 0,7706 |
| A01 | HLA-A*26:10 | 1095 | FVSNQTHWF    | 0,5675 |
| A01 | HLA-A*26:12 | 191  | EFVFKNIDGY   | 0,6509 |
| A01 | HLA-A*26:12 | 192  | FVFKNIDGY    | 0,8495 |
| A01 | HLA-A*26:12 | 258  | WTAGAAAYY    | 0,8859 |
| A01 | HLA-A*26:12 | 360  | NCVADYSVLY   | 0,7498 |
| A01 | HLA-A*26:12 | 361  | CVADYSVLY    | 0,7826 |
| A01 | HLA-A*26:12 | 603  | NTSNQVAVLY   | 0,5023 |
| A01 | HLA-A*26:12 | 686  | SVASQSIAY    | 0,5107 |
| A01 | HLA-A*26:12 | 780  | EVFAQVKQIY   | 0,5545 |
| A01 | HLA-A*26:12 | 1095 | FVSNQTHWF    | 0,5181 |
| A01 | HLA-A*26:13 | 28   | YTNSFTRGVY   | 0,5142 |
| A01 | HLA-A*26:13 | 191  | EFVFKNIDGY   | 0,7343 |
| A01 | HLA-A*26:13 | 192  | FVFKNIDGY    | 0,8696 |
| A01 | HLA-A*26:13 | 258  | WTAGAAAYY    | 0,9172 |
| A01 | HLA-A*26:13 | 340  | EVFNATRFASVY | 0,5729 |
| A01 | HLA-A*26:13 | 360  | NCVADYSVLY   | 0,7292 |
| A01 | HLA-A*26:13 | 361  | CVADYSVLY    | 0,794  |
| A01 | HLA-A*26:13 | 603  | NTSNQVAVLY   | 0,561  |
| A01 | HLA-A*26:13 | 686  | SVASQSIAY    | 0,6258 |
| A01 | HLA-A*26:13 | 780  | EVFAQVKQIY   | 0,7104 |
| A01 | HLA-A*26:13 | 886  | WTFGAGAAL    | 0,5071 |
| A01 | HLA-A*26:13 | 1095 | FVSNQTHWF    | 0,5038 |
| A01 | HLA-A*26:14 | 28   | YTNSFTRGVY   | 0,5472 |

|     |             |      |              |        |
|-----|-------------|------|--------------|--------|
| A01 | HLA-A*26:14 | 191  | EFVFKNIDGY   | 0,8157 |
| A01 | HLA-A*26:14 | 192  | FVFKNIDGY    | 0,9119 |
| A01 | HLA-A*26:14 | 258  | WTAGAAAYY    | 0,9338 |
| A01 | HLA-A*26:14 | 340  | EVFNATRFASVY | 0,6393 |
| A01 | HLA-A*26:14 | 360  | NCVADYSVLY   | 0,7886 |
| A01 | HLA-A*26:14 | 361  | CVADYSVLY    | 0,8578 |
| A01 | HLA-A*26:14 | 603  | NTSNQVAVLY   | 0,5793 |
| A01 | HLA-A*26:14 | 686  | SVASQSIIAY   | 0,6831 |
| A01 | HLA-A*26:14 | 780  | EVFAQVKQIY   | 0,7706 |
| A01 | HLA-A*26:14 | 1095 | FVSNQTHWF    | 0,5675 |
| A01 | HLA-A*26:15 | 28   | YTNSFTRGVY   | 0,5472 |
| A01 | HLA-A*26:15 | 191  | EFVFKNIDGY   | 0,8157 |
| A01 | HLA-A*26:15 | 192  | FVFKNIDGY    | 0,9119 |
| A01 | HLA-A*26:15 | 258  | WTAGAAAYY    | 0,9338 |
| A01 | HLA-A*26:15 | 340  | EVFNATRFASVY | 0,6393 |
| A01 | HLA-A*26:15 | 360  | NCVADYSVLY   | 0,7886 |
| A01 | HLA-A*26:15 | 361  | CVADYSVLY    | 0,8578 |
| A01 | HLA-A*26:15 | 603  | NTSNQVAVLY   | 0,5793 |
| A01 | HLA-A*26:15 | 686  | SVASQSIIAY   | 0,6831 |
| A01 | HLA-A*26:15 | 780  | EVFAQVKQIY   | 0,7706 |
| A01 | HLA-A*26:15 | 1095 | FVSNQTHWF    | 0,5675 |
| A01 | HLA-A*26:17 | 28   | YTNSFTRGVY   | 0,5472 |
| A01 | HLA-A*26:17 | 191  | EFVFKNIDGY   | 0,8157 |
| A01 | HLA-A*26:17 | 192  | FVFKNIDGY    | 0,9119 |
| A01 | HLA-A*26:17 | 258  | WTAGAAAYY    | 0,9338 |
| A01 | HLA-A*26:17 | 340  | EVFNATRFASVY | 0,6393 |
| A01 | HLA-A*26:17 | 360  | NCVADYSVLY   | 0,7886 |
| A01 | HLA-A*26:17 | 361  | CVADYSVLY    | 0,8578 |
| A01 | HLA-A*26:17 | 603  | NTSNQVAVLY   | 0,5793 |
| A01 | HLA-A*26:17 | 686  | SVASQSIIAY   | 0,6831 |
| A01 | HLA-A*26:17 | 780  | EVFAQVKQIY   | 0,7706 |
| A01 | HLA-A*26:17 | 1095 | FVSNQTHWF    | 0,5675 |
| A01 | HLA-A*26:18 | 191  | EFVFKNIDGY   | 0,6509 |
| A01 | HLA-A*26:18 | 192  | FVFKNIDGY    | 0,8495 |
| A01 | HLA-A*26:18 | 258  | WTAGAAAYY    | 0,8859 |
| A01 | HLA-A*26:18 | 360  | NCVADYSVLY   | 0,7498 |
| A01 | HLA-A*26:18 | 361  | CVADYSVLY    | 0,7826 |
| A01 | HLA-A*26:18 | 603  | NTSNQVAVLY   | 0,5023 |
| A01 | HLA-A*26:18 | 686  | SVASQSIIAY   | 0,5107 |
| A01 | HLA-A*26:18 | 780  | EVFAQVKQIY   | 0,5545 |
| A01 | HLA-A*26:18 | 1095 | FVSNQTHWF    | 0,5181 |
| A01 | HLA-A*26:19 | 28   | YTNSFTRGVY   | 0,7228 |
| A01 | HLA-A*26:19 | 28   | YTNSFTRGVYY  | 0,5399 |
| A01 | HLA-A*26:19 | 30   | NSFTRGVYY    | 0,7407 |
| A01 | HLA-A*26:19 | 50   | STQDLFLPF    | 0,6401 |
| A01 | HLA-A*26:19 | 161  | SSANNCTFEY   | 0,5341 |
| A01 | HLA-A*26:19 | 162  | SANNCTFEY    | 0,5571 |
| A01 | HLA-A*26:19 | 192  | FVFKNIDGY    | 0,8978 |
| A01 | HLA-A*26:19 | 256  | SGWTAGAAAYY  | 0,6687 |
| A01 | HLA-A*26:19 | 257  | GWTAGAAAYY   | 0,8485 |



|     |             |      |              |        |
|-----|-------------|------|--------------|--------|
| A01 | HLA-A*26:19 | 258  | WTAGAAAYY    | 0,9258 |
| A01 | HLA-A*26:19 | 261  | GAAAYYVGY    | 0,8482 |
| A01 | HLA-A*26:19 | 359  | SNCVADYSVLY  | 0,5535 |
| A01 | HLA-A*26:19 | 360  | NCVADYSVLY   | 0,613  |
| A01 | HLA-A*26:19 | 361  | CVADYSVLY    | 0,8311 |
| A01 | HLA-A*26:19 | 366  | SVLYNSASF    | 0,5818 |
| A01 | HLA-A*26:19 | 372  | ASFSTFKCY    | 0,5748 |
| A01 | HLA-A*26:19 | 603  | NTSNQVAVLY   | 0,5876 |
| A01 | HLA-A*26:19 | 604  | TSNQVAVLY    | 0,8069 |
| A01 | HLA-A*26:19 | 634  | RVYSTGSNVF   | 0,5845 |
| A01 | HLA-A*26:19 | 686  | SVASQSIIAY   | 0,8445 |
| A01 | HLA-A*26:19 | 687  | VASQSIIAY    | 0,7283 |
| A01 | HLA-A*26:19 | 691  | SIIAYTMSL    | 0,5489 |
| A01 | HLA-A*26:19 | 733  | KTSVDCTMY    | 0,5057 |
| A01 | HLA-A*26:19 | 865  | LTDEMIAQY    | 0,7578 |
| A01 | HLA-A*26:19 | 880  | GTITSGWTF    | 0,7351 |
| A01 | HLA-A*26:19 | 940  | STASALGKL    | 0,5468 |
| A01 | HLA-A*26:19 | 1054 | QSAPHGVVF    | 0,5969 |
| A01 | HLA-A*26:19 | 1059 | GVVFLHVTY    | 0,6507 |
| A01 | HLA-A*26:19 | 1095 | FVSNGTHWF    | 0,5261 |
| A01 | HLA-A*26:19 | 1128 | VVIGIVNNTVY  | 0,5268 |
| A01 | HLA-A*26:21 | 192  | FVFKNIDGY    | 0,7319 |
| A01 | HLA-A*26:21 | 258  | WTAGAAAYY    | 0,746  |
| A01 | HLA-A*26:23 | 28   | YTNSFTRGVY   | 0,5472 |
| A01 | HLA-A*26:23 | 191  | EFVFKNIDGY   | 0,8157 |
| A01 | HLA-A*26:23 | 192  | FVFKNIDGY    | 0,9119 |
| A01 | HLA-A*26:23 | 258  | WTAGAAAYY    | 0,9338 |
| A01 | HLA-A*26:23 | 340  | EVFNATRFASVY | 0,6393 |
| A01 | HLA-A*26:23 | 360  | NCVADYSVLY   | 0,7886 |
| A01 | HLA-A*26:23 | 361  | CVADYSVLY    | 0,8578 |
| A01 | HLA-A*26:23 | 603  | NTSNQVAVLY   | 0,5793 |
| A01 | HLA-A*26:23 | 686  | SVASQSIIAY   | 0,6831 |
| A01 | HLA-A*26:23 | 780  | EVFAQVKQIY   | 0,7706 |
| A01 | HLA-A*26:23 | 1095 | FVSNGTHWF    | 0,5675 |
| A01 | HLA-A*26:24 | 28   | YTNSFTRGVY   | 0,5472 |
| A01 | HLA-A*26:24 | 191  | EFVFKNIDGY   | 0,8157 |
| A01 | HLA-A*26:24 | 192  | FVFKNIDGY    | 0,9119 |
| A01 | HLA-A*26:24 | 258  | WTAGAAAYY    | 0,9338 |
| A01 | HLA-A*26:24 | 340  | EVFNATRFASVY | 0,6393 |
| A01 | HLA-A*26:24 | 360  | NCVADYSVLY   | 0,7886 |
| A01 | HLA-A*26:24 | 361  | CVADYSVLY    | 0,8578 |
| A01 | HLA-A*26:24 | 603  | NTSNQVAVLY   | 0,5793 |
| A01 | HLA-A*26:24 | 686  | SVASQSIIAY   | 0,6831 |
| A01 | HLA-A*26:24 | 780  | EVFAQVKQIY   | 0,7706 |
| A01 | HLA-A*26:24 | 1095 | FVSNGTHWF    | 0,5675 |
| A01 | HLA-A*26:26 | 28   | YTNSFTRGVY   | 0,5472 |
| A01 | HLA-A*26:26 | 191  | EFVFKNIDGY   | 0,8157 |
| A01 | HLA-A*26:26 | 192  | FVFKNIDGY    | 0,9119 |
| A01 | HLA-A*26:26 | 258  | WTAGAAAYY    | 0,9338 |
| A01 | HLA-A*26:26 | 340  | EVFNATRFASVY | 0,6393 |

|     |             |      |            |        |
|-----|-------------|------|------------|--------|
| A01 | HLA-A*26:26 | 360  | NCVADYSVLY | 0,7886 |
| A01 | HLA-A*26:26 | 361  | CVADYSVLY  | 0,8578 |
| A01 | HLA-A*26:26 | 603  | NTSNQVAVLY | 0,5793 |
| A01 | HLA-A*26:26 | 686  | SVASQSIIAY | 0,6831 |
| A01 | HLA-A*26:26 | 780  | EVFAQVKQIY | 0,7706 |
| A01 | HLA-A*26:26 | 1095 | FVSNATHWF  | 0,5675 |
| A01 | HLA-A*30:02 | 28   | YTNSFTRGVY | 0,5478 |
| A01 | HLA-A*30:02 | 30   | NSFTRGVYY  | 0,6841 |
| A01 | HLA-A*30:02 | 161  | SSANNCTFEY | 0,5282 |
| A01 | HLA-A*30:02 | 162  | SANNCTFEY  | 0,5717 |
| A01 | HLA-A*30:02 | 192  | FVFKNIDGY  | 0,5825 |
| A01 | HLA-A*30:02 | 195  | KNIDGYFKIY | 0,5462 |
| A01 | HLA-A*30:02 | 240  | TLLALHRSY  | 0,5237 |
| A01 | HLA-A*30:02 | 257  | GWTAGAAAYY | 0,6876 |
| A01 | HLA-A*30:02 | 258  | WTAGAAAYY  | 0,7568 |
| A01 | HLA-A*30:02 | 261  | GAAAYYVGY  | 0,6441 |
| A01 | HLA-A*30:02 | 304  | KSFTVEKGIY | 0,5482 |
| A01 | HLA-A*30:02 | 357  | RISNCVADY  | 0,5878 |
| A01 | HLA-A*30:02 | 361  | CVADYSVLY  | 0,5824 |
| A01 | HLA-A*30:02 | 372  | ASFSTFKCY  | 0,5884 |
| A01 | HLA-A*30:02 | 413  | GQTGKIADY  | 0,581  |
| A01 | HLA-A*30:02 | 444  | KVGGNYNYLY | 0,7271 |
| A01 | HLA-A*30:02 | 445  | VGGNYNYLY  | 0,5772 |
| A01 | HLA-A*30:02 | 496  | GFQPTNGVGY | 0,5657 |
| A01 | HLA-A*30:02 | 604  | TSNQVAVLY  | 0,8094 |
| A01 | HLA-A*30:02 | 628  | QLTPTWRVY  | 0,5588 |
| A01 | HLA-A*30:02 | 666  | IGAGICASY  | 0,6063 |
| A01 | HLA-A*30:02 | 686  | SVASQSIIAY | 0,5074 |
| A01 | HLA-A*30:02 | 687  | VASQSIIAY  | 0,6482 |
| A01 | HLA-A*30:02 | 733  | KTSVDCTMY  | 0,6807 |
| A01 | HLA-A*30:02 | 781  | VFAQVKQIY  | 0,6982 |
| A01 | HLA-A*30:02 | 865  | LTDEMIAQY  | 0,69   |
| A01 | HLA-A*30:02 | 1039 | RVDFCGKGY  | 0,6059 |
| A01 | HLA-A*30:02 | 1264 | VLKGVKLHY  | 0,8117 |
| A01 | HLA-A*30:03 | 28   | YTNSFTRGVY | 0,5478 |
| A01 | HLA-A*30:03 | 30   | NSFTRGVYY  | 0,6841 |
| A01 | HLA-A*30:03 | 161  | SSANNCTFEY | 0,5282 |
| A01 | HLA-A*30:03 | 162  | SANNCTFEY  | 0,5717 |
| A01 | HLA-A*30:03 | 192  | FVFKNIDGY  | 0,5825 |
| A01 | HLA-A*30:03 | 195  | KNIDGYFKIY | 0,5462 |
| A01 | HLA-A*30:03 | 240  | TLLALHRSY  | 0,5237 |
| A01 | HLA-A*30:03 | 257  | GWTAGAAAYY | 0,6876 |
| A01 | HLA-A*30:03 | 258  | WTAGAAAYY  | 0,7568 |
| A01 | HLA-A*30:03 | 261  | GAAAYYVGY  | 0,6441 |
| A01 | HLA-A*30:03 | 304  | KSFTVEKGIY | 0,5482 |
| A01 | HLA-A*30:03 | 357  | RISNCVADY  | 0,5878 |
| A01 | HLA-A*30:03 | 361  | CVADYSVLY  | 0,5824 |
| A01 | HLA-A*30:03 | 372  | ASFSTFKCY  | 0,5884 |
| A01 | HLA-A*30:03 | 413  | GQTGKIADY  | 0,581  |
| A01 | HLA-A*30:03 | 444  | KVGGNYNYLY | 0,7271 |

|     |             |      |            |        |
|-----|-------------|------|------------|--------|
| A01 | HLA-A*30:03 | 445  | VGGNYNYLY  | 0,5772 |
| A01 | HLA-A*30:03 | 496  | GFQPTNGVGY | 0,5657 |
| A01 | HLA-A*30:03 | 604  | TSNQVAVLY  | 0,8094 |
| A01 | HLA-A*30:03 | 628  | QLTPTWRVY  | 0,5588 |
| A01 | HLA-A*30:03 | 666  | IGAGICASY  | 0,6063 |
| A01 | HLA-A*30:03 | 686  | SVASQSIIAY | 0,5074 |
| A01 | HLA-A*30:03 | 687  | VASQSIIAY  | 0,6482 |
| A01 | HLA-A*30:03 | 733  | KTSVDCTMY  | 0,6807 |
| A01 | HLA-A*30:03 | 781  | VFAQVKQIY  | 0,6982 |
| A01 | HLA-A*30:03 | 865  | LTDEMIAQY  | 0,69   |
| A01 | HLA-A*30:03 | 1039 | RVDFCGKGY  | 0,6059 |
| A01 | HLA-A*30:03 | 1264 | VLKGVKLHY  | 0,8117 |
| A01 | HLA-A*30:04 | 257  | GWTAGAAAYY | 0,5598 |
| A01 | HLA-A*30:04 | 258  | WTAGAAAYY  | 0,6721 |
| A01 | HLA-A*30:04 | 261  | GAAAYYVGY  | 0,5257 |
| A01 | HLA-A*30:04 | 444  | KVGGNYNYLY | 0,5264 |
| A01 | HLA-A*30:04 | 445  | VGGNYNYLY  | 0,512  |
| A01 | HLA-A*30:04 | 604  | TSNQVAVLY  | 0,6629 |
| A01 | HLA-A*30:06 | 257  | GWTAGAAAYY | 0,5598 |
| A01 | HLA-A*30:06 | 258  | WTAGAAAYY  | 0,6721 |
| A01 | HLA-A*30:06 | 261  | GAAAYYVGY  | 0,5257 |
| A01 | HLA-A*30:06 | 444  | KVGGNYNYLY | 0,5264 |
| A01 | HLA-A*30:06 | 445  | VGGNYNYLY  | 0,512  |
| A01 | HLA-A*30:06 | 604  | TSNQVAVLY  | 0,6629 |
| A01 | HLA-A*30:09 | 30   | NSFTRGVYY  | 0,5993 |
| A01 | HLA-A*30:09 | 162  | SANNCTFEY  | 0,5586 |
| A01 | HLA-A*30:09 | 195  | KNIDGYFKIY | 0,5437 |
| A01 | HLA-A*30:09 | 257  | GWTAGAAAYY | 0,5637 |
| A01 | HLA-A*30:09 | 258  | WTAGAAAYY  | 0,667  |
| A01 | HLA-A*30:09 | 261  | GAAAYYVGY  | 0,6001 |
| A01 | HLA-A*30:09 | 361  | CVADYSVLY  | 0,5285 |
| A01 | HLA-A*30:09 | 444  | KVGGNYNYLY | 0,6407 |
| A01 | HLA-A*30:09 | 445  | VGGNYNYLY  | 0,6713 |
| A01 | HLA-A*30:09 | 604  | TSNQVAVLY  | 0,7365 |
| A01 | HLA-A*30:09 | 666  | IGAGICASY  | 0,5459 |
| A01 | HLA-A*30:09 | 733  | KTSVDCTMY  | 0,5356 |
| A01 | HLA-A*30:09 | 781  | VFAQVKQIY  | 0,6655 |
| A01 | HLA-A*30:09 | 865  | LTDEMIAQY  | 0,6628 |
| A01 | HLA-A*30:12 | 28   | YTNSFTRGVY | 0,5478 |
| A01 | HLA-A*30:12 | 30   | NSFTRGVYY  | 0,6841 |
| A01 | HLA-A*30:12 | 161  | SSANNCTFEY | 0,5282 |
| A01 | HLA-A*30:12 | 162  | SANNCTFEY  | 0,5717 |
| A01 | HLA-A*30:12 | 192  | FVFKNIDGY  | 0,5825 |
| A01 | HLA-A*30:12 | 195  | KNIDGYFKIY | 0,5462 |
| A01 | HLA-A*30:12 | 240  | TLLALHRYS  | 0,5237 |
| A01 | HLA-A*30:12 | 257  | GWTAGAAAYY | 0,6876 |
| A01 | HLA-A*30:12 | 258  | WTAGAAAYY  | 0,7568 |
| A01 | HLA-A*30:12 | 261  | GAAAYYVGY  | 0,6441 |
| A01 | HLA-A*30:12 | 304  | KSFTVEKGIY | 0,5482 |
| A01 | HLA-A*30:12 | 357  | RISNCVADY  | 0,5878 |

|     |             |      |            |        |
|-----|-------------|------|------------|--------|
| A01 | HLA-A*30:12 | 361  | CVADYSVLY  | 0,5824 |
| A01 | HLA-A*30:12 | 372  | ASFSTFKCY  | 0,5884 |
| A01 | HLA-A*30:12 | 413  | GQTGKIADY  | 0,581  |
| A01 | HLA-A*30:12 | 444  | KVGGNYNYLY | 0,7271 |
| A01 | HLA-A*30:12 | 445  | VGGNYNYLY  | 0,5772 |
| A01 | HLA-A*30:12 | 496  | GFQPTNGVGY | 0,5657 |
| A01 | HLA-A*30:12 | 604  | TSNQVAVLY  | 0,8094 |
| A01 | HLA-A*30:12 | 628  | QLTPTWRVY  | 0,5588 |
| A01 | HLA-A*30:12 | 666  | IGAGICASY  | 0,6063 |
| A01 | HLA-A*30:12 | 686  | SVASQSIIAY | 0,5074 |
| A01 | HLA-A*30:12 | 687  | VASQSIIAY  | 0,6482 |
| A01 | HLA-A*30:12 | 733  | KTSVDCTMY  | 0,6807 |
| A01 | HLA-A*30:12 | 781  | VFAQVKQIY  | 0,6982 |
| A01 | HLA-A*30:12 | 865  | LTDEMIAQY  | 0,69   |
| A01 | HLA-A*30:12 | 1039 | RVDFCGKGY  | 0,6059 |
| A01 | HLA-A*30:12 | 1264 | VLKGVKLHY  | 0,8117 |
| A01 | HLA-A*32:01 | 366  | SVLYNSASF  | 0,6299 |
| A01 | HLA-A*32:01 | 417  | KIADYNYKL  | 0,8445 |
| A01 | HLA-A*32:01 | 634  | RVYSTGSNVF | 0,6705 |
| A01 | HLA-A*32:01 | 691  | SIIAYTMSL  | 0,7021 |
| A01 | HLA-A*32:01 | 815  | RSFIEDLLF  | 0,5863 |
| A01 | HLA-A*32:01 | 880  | GTITSGWTF  | 0,7522 |
| A01 | HLA-A*32:01 | 1185 | RLNEVAKNL  | 0,7116 |
| A01 | HLA-A*32:02 | 366  | SVLYNSASF  | 0,5561 |
| A01 | HLA-A*32:02 | 417  | KIADYNYKL  | 0,7698 |
| A01 | HLA-A*32:02 | 634  | RVYSTGSNVF | 0,5403 |
| A01 | HLA-A*32:02 | 691  | SIIAYTMSL  | 0,62   |
| A01 | HLA-A*32:02 | 880  | GTITSGWTF  | 0,6422 |
| A01 | HLA-A*32:02 | 1185 | RLNEVAKNL  | 0,6529 |
| A01 | HLA-A*32:05 | 366  | SVLYNSASF  | 0,6066 |
| A01 | HLA-A*32:05 | 417  | KIADYNYKL  | 0,7528 |
| A01 | HLA-A*32:05 | 634  | RVYSTGSNVF | 0,5466 |
| A01 | HLA-A*32:05 | 691  | SIIAYTMSL  | 0,6692 |
| A01 | HLA-A*32:05 | 815  | RSFIEDLLF  | 0,5277 |
| A01 | HLA-A*32:05 | 880  | GTITSGWTF  | 0,7114 |
| A01 | HLA-A*32:05 | 1185 | RLNEVAKNL  | 0,5942 |
| A01 | HLA-A*32:06 | 366  | SVLYNSASF  | 0,6299 |
| A01 | HLA-A*32:06 | 417  | KIADYNYKL  | 0,8445 |
| A01 | HLA-A*32:06 | 634  | RVYSTGSNVF | 0,6705 |
| A01 | HLA-A*32:06 | 691  | SIIAYTMSL  | 0,7021 |
| A01 | HLA-A*32:06 | 815  | RSFIEDLLF  | 0,5863 |
| A01 | HLA-A*32:06 | 880  | GTITSGWTF  | 0,7522 |
| A01 | HLA-A*32:06 | 1185 | RLNEVAKNL  | 0,7116 |
| A01 | HLA-A*32:07 | 50   | STQDLFLPF  | 0,5832 |
| A01 | HLA-A*32:07 | 77   | KRFDNPVLPF | 0,6519 |
| A01 | HLA-A*32:07 | 78   | RFDNPVLPF  | 0,7048 |
| A01 | HLA-A*32:07 | 144  | YYHKNNKSW  | 0,6197 |
| A01 | HLA-A*32:07 | 193  | VFKNIDGYF  | 0,6354 |
| A01 | HLA-A*32:07 | 195  | KNIDGYFKI  | 0,501  |
| A01 | HLA-A*32:07 | 261  | GAAAYVGY   | 0,5142 |

|     |             |      |              |        |
|-----|-------------|------|--------------|--------|
| A01 | HLA-A*32:07 | 267  | VGYLQPRTF    | 0,5924 |
| A01 | HLA-A*32:07 | 268  | GYLQPRTF     | 0,5759 |
| A01 | HLA-A*32:07 | 310  | KGIYQTSNF    | 0,5492 |
| A01 | HLA-A*32:07 | 345  | TRFASVYAW    | 0,7472 |
| A01 | HLA-A*32:07 | 366  | SVLYNSASF    | 0,7088 |
| A01 | HLA-A*32:07 | 417  | KIADYNYKL    | 0,6173 |
| A01 | HLA-A*32:07 | 557  | KKFLPFQQF    | 0,6339 |
| A01 | HLA-A*32:07 | 634  | RVYSTGSNVF   | 0,6399 |
| A01 | HLA-A*32:07 | 635  | VYSTGSNVF    | 0,566  |
| A01 | HLA-A*32:07 | 689  | SQSIIAYTM    | 0,5018 |
| A01 | HLA-A*32:07 | 710  | NSIAIPTNF    | 0,6477 |
| A01 | HLA-A*32:07 | 781  | VFAQVKQIY    | 0,715  |
| A01 | HLA-A*32:07 | 815  | RSFIEDLLF    | 0,684  |
| A01 | HLA-A*32:07 | 880  | GTITSGWTF    | 0,8141 |
| A01 | HLA-A*32:07 | 1054 | QSAPHGVVF    | 0,6406 |
| A01 | HLA-A*32:07 | 1101 | HWFVTQRNF    | 0,7546 |
| A01 | HLA-A*32:07 | 1208 | QYIKWPWYI    | 0,6932 |
| A01 | HLA-A*32:09 | 50   | STQDLFLPF    | 0,5147 |
| A01 | HLA-A*32:09 | 366  | SVLYNSASF    | 0,6078 |
| A01 | HLA-A*32:09 | 417  | KIADYNYKL    | 0,6951 |
| A01 | HLA-A*32:09 | 691  | SIIAYTMSL    | 0,552  |
| A01 | HLA-A*32:09 | 815  | RSFIEDLLF    | 0,5187 |
| A01 | HLA-A*32:09 | 880  | GTITSGWTF    | 0,7219 |
| A01 | HLA-A*32:10 | 634  | RVYSTGSNVF   | 0,5972 |
| A01 | HLA-A*36:01 | 28   | YTNSFTRGVY   | 0,7119 |
| A01 | HLA-A*36:01 | 28   | YTNSFTRGVYY  | 0,7867 |
| A01 | HLA-A*36:01 | 160  | YSSANNCTFEY  | 0,5391 |
| A01 | HLA-A*36:01 | 161  | SSANNCTFEY   | 0,7073 |
| A01 | HLA-A*36:01 | 162  | SANNCTFEY    | 0,6682 |
| A01 | HLA-A*36:01 | 256  | SGWTAGAAAYY  | 0,667  |
| A01 | HLA-A*36:01 | 257  | GWTAGAAAYY   | 0,7231 |
| A01 | HLA-A*36:01 | 258  | WTAGAAAYY    | 0,8964 |
| A01 | HLA-A*36:01 | 358  | ISNCVADYSVLY | 0,6026 |
| A01 | HLA-A*36:01 | 361  | CVADYSVLY    | 0,7473 |
| A01 | HLA-A*36:01 | 362  | VADYSVLY     | 0,65   |
| A01 | HLA-A*36:01 | 414  | QTGKIADYNY   | 0,5523 |
| A01 | HLA-A*36:01 | 601  | GTNTSNQVAVLY | 0,629  |
| A01 | HLA-A*36:01 | 603  | NTSNQVAVLY   | 0,7051 |
| A01 | HLA-A*36:01 | 604  | TSNQVAVLY    | 0,8841 |
| A01 | HLA-A*36:01 | 733  | KTSVDCTMY    | 0,7042 |
| A01 | HLA-A*36:01 | 746  | STECNLLLQY   | 0,6614 |
| A01 | HLA-A*36:01 | 828  | LADAGFIKQY   | 0,7384 |
| A01 | HLA-A*36:01 | 863  | PLLTDEMIAQY  | 0,5018 |
| A01 | HLA-A*36:01 | 865  | LTDEMIAQY    | 0,9845 |
| A01 | HLA-A*36:01 | 1039 | RVDFCGKGY    | 0,8092 |
| A01 | HLA-A*36:01 | 1197 | LIDLQELGKY   | 0,7101 |
| A01 | HLA-A*36:02 | 28   | YTNSFTRGVY   | 0,5893 |
| A01 | HLA-A*36:02 | 28   | YTNSFTRGVYY  | 0,6541 |
| A01 | HLA-A*36:02 | 161  | SSANNCTFEY   | 0,6078 |
| A01 | HLA-A*36:02 | 162  | SANNCTFEY    | 0,605  |

|         |             |      |              |        |
|---------|-------------|------|--------------|--------|
| A01     | HLA-A*36:02 | 256  | SGWTAGAAAYY  | 0,583  |
| A01     | HLA-A*36:02 | 257  | GWTAGAAAYY   | 0,6743 |
| A01     | HLA-A*36:02 | 258  | WTAGAAAYY    | 0,8378 |
| A01     | HLA-A*36:02 | 361  | CVADYSVLY    | 0,6943 |
| A01     | HLA-A*36:02 | 444  | KVGGNYNYLY   | 0,5293 |
| A01     | HLA-A*36:02 | 601  | GTNTSNQVAVLY | 0,5171 |
| A01     | HLA-A*36:02 | 603  | NTSNQVAVLY   | 0,5926 |
| A01     | HLA-A*36:02 | 604  | TSNQVAVLY    | 0,8154 |
| A01     | HLA-A*36:02 | 733  | KTSVDCTMY    | 0,6327 |
| A01     | HLA-A*36:02 | 865  | LTDEMIAQY    | 0,95   |
| A01     | HLA-A*36:02 | 1039 | RVDFCGKGY    | 0,7404 |
| A01     | HLA-A*36:02 | 1197 | LIDLQELGKY   | 0,5242 |
| A01     | HLA-A*36:04 | 28   | YTNSFTRGVY   | 0,7271 |
| A01     | HLA-A*36:04 | 28   | YTNSFTRGVYY  | 0,8143 |
| A01     | HLA-A*36:04 | 30   | NSFTRGVYY    | 0,6993 |
| A01     | HLA-A*36:04 | 160  | YSSANNCTFEY  | 0,6118 |
| A01     | HLA-A*36:04 | 161  | SSANNCTFEY   | 0,727  |
| A01     | HLA-A*36:04 | 162  | SANNCTFEY    | 0,6738 |
| A01     | HLA-A*36:04 | 256  | SGWTAGAAAYY  | 0,709  |
| A01     | HLA-A*36:04 | 257  | GWTAGAAAYY   | 0,7396 |
| A01     | HLA-A*36:04 | 258  | WTAGAAAYY    | 0,9128 |
| A01     | HLA-A*36:04 | 358  | ISNCVADYSVLY | 0,652  |
| A01     | HLA-A*36:04 | 361  | CVADYSVLY    | 0,7656 |
| A01     | HLA-A*36:04 | 362  | VADYSVLY     | 0,6977 |
| A01     | HLA-A*36:04 | 414  | QTGKIADYNY   | 0,5768 |
| A01     | HLA-A*36:04 | 601  | GTNTSNQVAVLY | 0,6316 |
| A01     | HLA-A*36:04 | 603  | NTSNQVAVLY   | 0,7383 |
| A01     | HLA-A*36:04 | 604  | TSNQVAVLY    | 0,9007 |
| A01     | HLA-A*36:04 | 733  | KTSVDCTMY    | 0,64   |
| A01     | HLA-A*36:04 | 746  | STECNLLLQY   | 0,7554 |
| A01     | HLA-A*36:04 | 828  | LADAGFIKQY   | 0,7998 |
| A01     | HLA-A*36:04 | 863  | PLLTDEMIAQY  | 0,6402 |
| A01     | HLA-A*36:04 | 865  | LTDEMIAQY    | 0,9936 |
| A01     | HLA-A*36:04 | 1039 | RVDFCGKGY    | 0,7674 |
| A01     | HLA-A*36:04 | 1197 | LIDLQELGKY   | 0,7682 |
| A01 A03 | HLA-A*30:01 | 89   | GVYFASTEK    | 0,524  |
| A01 A03 | HLA-A*30:01 | 142  | GVYYHKNNK    | 0,5185 |
| A01 A03 | HLA-A*30:01 | 302  | TLKSFTVEK    | 0,5401 |
| A01 A03 | HLA-A*30:01 | 344  | ATRFASVYA    | 0,8043 |
| A01 A03 | HLA-A*30:01 | 378  | KCYGVSPK     | 0,5092 |
| A01 A03 | HLA-A*30:01 | 454  | RLFRKSNLK    | 0,5644 |
| A01 A03 | HLA-A*30:01 | 634  | RVYSTGSNV    | 0,632  |
| A01 A03 | HLA-A*30:01 | 1065 | VTYVPAQEK    | 0,5221 |
| A01 A03 | HLA-A*30:08 | 344  | ATRFASVYA    | 0,6186 |
| A01 A03 | HLA-A*30:11 | 89   | GVYFASTEK    | 0,524  |
| A01 A03 | HLA-A*30:11 | 142  | GVYYHKNNK    | 0,5185 |
| A01 A03 | HLA-A*30:11 | 302  | TLKSFTVEK    | 0,5401 |
| A01 A03 | HLA-A*30:11 | 344  | ATRFASVYA    | 0,8043 |
| A01 A03 | HLA-A*30:11 | 378  | KCYGVSPK     | 0,5092 |
| A01 A03 | HLA-A*30:11 | 454  | RLFRKSNLK    | 0,5644 |

|         |             |      |             |        |
|---------|-------------|------|-------------|--------|
| A01 A03 | HLA-A*30:11 | 634  | RVYSTGSNV   | 0,632  |
| A01 A03 | HLA-A*30:11 | 1065 | VTYVPAQEK   | 0,5221 |
| A01 A03 | HLA-A*30:15 | 89   | GVYFASTEK   | 0,524  |
| A01 A03 | HLA-A*30:15 | 142  | GVYYHKNNK   | 0,5185 |
| A01 A03 | HLA-A*30:15 | 302  | TLKSFTVEK   | 0,5401 |
| A01 A03 | HLA-A*30:15 | 344  | ATRFASVYA   | 0,8043 |
| A01 A03 | HLA-A*30:15 | 378  | KCYGVSPTK   | 0,5092 |
| A01 A03 | HLA-A*30:15 | 454  | RLFRKSNLK   | 0,5644 |
| A01 A03 | HLA-A*30:15 | 634  | RVYSTGSNV   | 0,632  |
| A01 A03 | HLA-A*30:15 | 1065 | VTYVPAQEK   | 0,5221 |
| A01 A24 | HLA-A*29:01 | 30   | NSFTRGVYY   | 0,825  |
| A01 A24 | HLA-A*29:01 | 151  | SWMESEFRVY  | 0,7114 |
| A01 A24 | HLA-A*29:01 | 162  | SANNCTFEY   | 0,7814 |
| A01 A24 | HLA-A*29:01 | 192  | FVFKNIDGY   | 0,9181 |
| A01 A24 | HLA-A*29:01 | 240  | TLLALHRSY   | 0,6806 |
| A01 A24 | HLA-A*29:01 | 257  | GWTAGAAAY   | 0,5826 |
| A01 A24 | HLA-A*29:01 | 257  | GWTAGAAAYY  | 0,6803 |
| A01 A24 | HLA-A*29:01 | 258  | WTAGAAAYY   | 0,9403 |
| A01 A24 | HLA-A*29:01 | 261  | GAAAYYVGY   | 0,7714 |
| A01 A24 | HLA-A*29:01 | 360  | NCVADYSVLY  | 0,6347 |
| A01 A24 | HLA-A*29:01 | 361  | CVADYSVLY   | 0,9086 |
| A01 A24 | HLA-A*29:01 | 444  | KVGGNYNYLY  | 0,5931 |
| A01 A24 | HLA-A*29:01 | 445  | VGGNYNYLY   | 0,6436 |
| A01 A24 | HLA-A*29:01 | 496  | GFQPTNGVGY  | 0,6858 |
| A01 A24 | HLA-A*29:01 | 604  | TSNQVAVLY   | 0,8854 |
| A01 A24 | HLA-A*29:01 | 628  | QLTPTWRVY   | 0,51   |
| A01 A24 | HLA-A*29:01 | 686  | SVASQSIIAY  | 0,6064 |
| A01 A24 | HLA-A*29:01 | 687  | VASQSIIAY   | 0,6791 |
| A01 A24 | HLA-A*29:01 | 781  | VFAQVKQIY   | 0,9197 |
| A01 A24 | HLA-A*29:01 | 827  | TLADAGFIKQY | 0,5983 |
| A01 A24 | HLA-A*29:01 | 865  | LTDEMIAQY   | 0,819  |
| A01 A24 | HLA-A*29:01 | 896  | IPFAMQMAY   | 0,5343 |
| A01 A24 | HLA-A*29:01 | 909  | IGVTQNVLY   | 0,5165 |
| A01 A24 | HLA-A*29:01 | 1059 | GVVFLHVTY   | 0,7218 |
| A01 A24 | HLA-A*29:01 | 1102 | WVFTQRNFY   | 0,7439 |
| A01 A24 | HLA-A*29:01 | 1147 | SFKEELDKY   | 0,6923 |
| A01 A24 | HLA-A*29:01 | 1264 | VLKGVKLHY   | 0,8598 |
| A01 A24 | HLA-A*29:02 | 30   | NSFTRGVYY   | 0,825  |
| A01 A24 | HLA-A*29:02 | 151  | SWMESEFRVY  | 0,7114 |
| A01 A24 | HLA-A*29:02 | 162  | SANNCTFEY   | 0,7814 |
| A01 A24 | HLA-A*29:02 | 192  | FVFKNIDGY   | 0,9181 |
| A01 A24 | HLA-A*29:02 | 240  | TLLALHRSY   | 0,6806 |
| A01 A24 | HLA-A*29:02 | 257  | GWTAGAAAY   | 0,5826 |
| A01 A24 | HLA-A*29:02 | 257  | GWTAGAAAYY  | 0,6803 |
| A01 A24 | HLA-A*29:02 | 258  | WTAGAAAYY   | 0,9403 |
| A01 A24 | HLA-A*29:02 | 261  | GAAAYYVGY   | 0,7714 |
| A01 A24 | HLA-A*29:02 | 360  | NCVADYSVLY  | 0,6347 |
| A01 A24 | HLA-A*29:02 | 361  | CVADYSVLY   | 0,9086 |
| A01 A24 | HLA-A*29:02 | 444  | KVGGNYNYLY  | 0,5931 |
| A01 A24 | HLA-A*29:02 | 445  | VGGNYNYLY   | 0,6436 |

|         |             |      |             |        |
|---------|-------------|------|-------------|--------|
| A01 A24 | HLA-A*29:02 | 496  | GFQPTNGVGY  | 0,6858 |
| A01 A24 | HLA-A*29:02 | 604  | TSNQVAVLY   | 0,8854 |
| A01 A24 | HLA-A*29:02 | 628  | QLTPTWRVY   | 0,51   |
| A01 A24 | HLA-A*29:02 | 686  | SVASQSIIAY  | 0,6064 |
| A01 A24 | HLA-A*29:02 | 687  | VASQSIIAY   | 0,6791 |
| A01 A24 | HLA-A*29:02 | 781  | VFAQVKQIY   | 0,9197 |
| A01 A24 | HLA-A*29:02 | 827  | TLADAGFIKQY | 0,5983 |
| A01 A24 | HLA-A*29:02 | 865  | LTDEMIAQY   | 0,819  |
| A01 A24 | HLA-A*29:02 | 896  | IPFAMQMAY   | 0,5343 |
| A01 A24 | HLA-A*29:02 | 909  | IGVTQNVLY   | 0,5165 |
| A01 A24 | HLA-A*29:02 | 1059 | GVVFLHVTY   | 0,7218 |
| A01 A24 | HLA-A*29:02 | 1102 | WFVTQRNFY   | 0,7439 |
| A01 A24 | HLA-A*29:02 | 1147 | SFKEELDKY   | 0,6923 |
| A01 A24 | HLA-A*29:02 | 1264 | VLKGVKLHY   | 0,8598 |
| A01 A24 | HLA-A*29:03 | 30   | NSFTRGVYY   | 0,7608 |
| A01 A24 | HLA-A*29:03 | 151  | SWMESEFRVY  | 0,5544 |
| A01 A24 | HLA-A*29:03 | 152  | WMESEFRVY   | 0,5108 |
| A01 A24 | HLA-A*29:03 | 162  | SANNTCFEY   | 0,6647 |
| A01 A24 | HLA-A*29:03 | 192  | FVFKNIDGY   | 0,814  |
| A01 A24 | HLA-A*29:03 | 240  | TLLALHRSY   | 0,5915 |
| A01 A24 | HLA-A*29:03 | 258  | WTAGAAAYY   | 0,863  |
| A01 A24 | HLA-A*29:03 | 261  | GAAAYYVGY   | 0,648  |
| A01 A24 | HLA-A*29:03 | 360  | NCVADYSVLY  | 0,6374 |
| A01 A24 | HLA-A*29:03 | 361  | CVADYSVLY   | 0,8638 |
| A01 A24 | HLA-A*29:03 | 445  | VGGNYNYLY   | 0,5077 |
| A01 A24 | HLA-A*29:03 | 603  | NTSNQVAVLY  | 0,5268 |
| A01 A24 | HLA-A*29:03 | 604  | TSNQVAVLY   | 0,8418 |
| A01 A24 | HLA-A*29:03 | 781  | VFAQVKQIY   | 0,8384 |
| A01 A24 | HLA-A*29:03 | 865  | LTDEMIAQY   | 0,7807 |
| A01 A24 | HLA-A*29:03 | 1102 | WFVTQRNFY   | 0,612  |
| A01 A24 | HLA-A*29:05 | 30   | NSFTRGVYY   | 0,6683 |
| A01 A24 | HLA-A*29:05 | 192  | FVFKNIDGY   | 0,6624 |
| A01 A24 | HLA-A*29:05 | 240  | TLLALHRSY   | 0,5807 |
| A01 A24 | HLA-A*29:05 | 257  | GWTAGAAAYY  | 0,595  |
| A01 A24 | HLA-A*29:05 | 258  | WTAGAAAYY   | 0,7752 |
| A01 A24 | HLA-A*29:05 | 361  | CVADYSVLY   | 0,6495 |
| A01 A24 | HLA-A*29:05 | 496  | GFQPTNGVGY  | 0,6148 |
| A01 A24 | HLA-A*29:05 | 604  | TSNQVAVLY   | 0,6551 |
| A01 A24 | HLA-A*29:05 | 686  | SVASQSIIAY  | 0,547  |
| A01 A24 | HLA-A*29:05 | 781  | VFAQVKQIY   | 0,7974 |
| A01 A24 | HLA-A*29:05 | 1102 | WFVTQRNFY   | 0,5904 |
| A01 A24 | HLA-A*29:05 | 1264 | VLKGVKLHY   | 0,8571 |
| A01 A24 | HLA-A*29:06 | 30   | NSFTRGVYY   | 0,825  |
| A01 A24 | HLA-A*29:06 | 151  | SWMESEFRVY  | 0,7114 |
| A01 A24 | HLA-A*29:06 | 162  | SANNTCFEY   | 0,7814 |
| A01 A24 | HLA-A*29:06 | 192  | FVFKNIDGY   | 0,9181 |
| A01 A24 | HLA-A*29:06 | 240  | TLLALHRSY   | 0,6806 |
| A01 A24 | HLA-A*29:06 | 257  | GWTAGAAAYY  | 0,5826 |
| A01 A24 | HLA-A*29:06 | 257  | GWTAGAAAYY  | 0,6803 |
| A01 A24 | HLA-A*29:06 | 258  | WTAGAAAYY   | 0,9403 |



|         |             |      |             |        |
|---------|-------------|------|-------------|--------|
| A01 A24 | HLA-A*29:06 | 261  | GAAAYVGY    | 0,7714 |
| A01 A24 | HLA-A*29:06 | 360  | NCVADYSVLY  | 0,6347 |
| A01 A24 | HLA-A*29:06 | 361  | CVADYSVLY   | 0,9086 |
| A01 A24 | HLA-A*29:06 | 444  | KVGGNYNYLY  | 0,5931 |
| A01 A24 | HLA-A*29:06 | 445  | VGGNYNYLY   | 0,6436 |
| A01 A24 | HLA-A*29:06 | 496  | GFQPTNGVGY  | 0,6858 |
| A01 A24 | HLA-A*29:06 | 604  | TSNQVAVLY   | 0,8854 |
| A01 A24 | HLA-A*29:06 | 628  | QLTPTWRVY   | 0,51   |
| A01 A24 | HLA-A*29:06 | 686  | SVASQSIIAY  | 0,6064 |
| A01 A24 | HLA-A*29:06 | 687  | VASQSIIAY   | 0,6791 |
| A01 A24 | HLA-A*29:06 | 781  | VFAQVKQIY   | 0,9197 |
| A01 A24 | HLA-A*29:06 | 827  | TLADAGFIKQY | 0,5983 |
| A01 A24 | HLA-A*29:06 | 865  | LTDEMIAQY   | 0,819  |
| A01 A24 | HLA-A*29:06 | 896  | IPFAMQMAY   | 0,5343 |
| A01 A24 | HLA-A*29:06 | 909  | IGVTQNVLY   | 0,5165 |
| A01 A24 | HLA-A*29:06 | 1059 | GVVFLHVTY   | 0,7218 |
| A01 A24 | HLA-A*29:06 | 1102 | WFVTQRNFY   | 0,7439 |
| A01 A24 | HLA-A*29:06 | 1147 | SFKEELDKY   | 0,6923 |
| A01 A24 | HLA-A*29:06 | 1264 | VLKGVKLHY   | 0,8598 |
| A01 A24 | HLA-A*29:09 | 30   | NSFTRGVYY   | 0,825  |
| A01 A24 | HLA-A*29:09 | 151  | SWMESEFRVY  | 0,7114 |
| A01 A24 | HLA-A*29:09 | 162  | SANNCTFEY   | 0,7814 |
| A01 A24 | HLA-A*29:09 | 192  | FVFKNIDGY   | 0,9181 |
| A01 A24 | HLA-A*29:09 | 240  | TLLALHRSY   | 0,6806 |
| A01 A24 | HLA-A*29:09 | 257  | GWTAGAAAY   | 0,5826 |
| A01 A24 | HLA-A*29:09 | 257  | GWTAGAAAYY  | 0,6803 |
| A01 A24 | HLA-A*29:09 | 258  | WTAGAAAYY   | 0,9403 |
| A01 A24 | HLA-A*29:09 | 261  | GAAAYVGY    | 0,7714 |
| A01 A24 | HLA-A*29:09 | 360  | NCVADYSVLY  | 0,6347 |
| A01 A24 | HLA-A*29:09 | 361  | CVADYSVLY   | 0,9086 |
| A01 A24 | HLA-A*29:09 | 444  | KVGGNYNYLY  | 0,5931 |
| A01 A24 | HLA-A*29:09 | 445  | VGGNYNYLY   | 0,6436 |
| A01 A24 | HLA-A*29:09 | 496  | GFQPTNGVGY  | 0,6858 |
| A01 A24 | HLA-A*29:09 | 604  | TSNQVAVLY   | 0,8854 |
| A01 A24 | HLA-A*29:09 | 628  | QLTPTWRVY   | 0,51   |
| A01 A24 | HLA-A*29:09 | 686  | SVASQSIIAY  | 0,6064 |
| A01 A24 | HLA-A*29:09 | 687  | VASQSIIAY   | 0,6791 |
| A01 A24 | HLA-A*29:09 | 781  | VFAQVKQIY   | 0,9197 |
| A01 A24 | HLA-A*29:09 | 827  | TLADAGFIKQY | 0,5983 |
| A01 A24 | HLA-A*29:09 | 865  | LTDEMIAQY   | 0,819  |
| A01 A24 | HLA-A*29:09 | 896  | IPFAMQMAY   | 0,5343 |
| A01 A24 | HLA-A*29:09 | 909  | IGVTQNVLY   | 0,5165 |
| A01 A24 | HLA-A*29:09 | 1059 | GVVFLHVTY   | 0,7218 |
| A01 A24 | HLA-A*29:09 | 1102 | WFVTQRNFY   | 0,7439 |
| A01 A24 | HLA-A*29:09 | 1147 | SFKEELDKY   | 0,6923 |
| A01 A24 | HLA-A*29:09 | 1264 | VLKGVKLHY   | 0,8598 |
| A01 A24 | HLA-A*29:10 | 30   | NSFTRGVYY   | 0,825  |
| A01 A24 | HLA-A*29:10 | 151  | SWMESEFRVY  | 0,7114 |
| A01 A24 | HLA-A*29:10 | 162  | SANNCTFEY   | 0,7814 |
| A01 A24 | HLA-A*29:10 | 192  | FVFKNIDGY   | 0,9181 |

|         |             |      |             |        |
|---------|-------------|------|-------------|--------|
| A01 A24 | HLA-A*29:10 | 240  | TLLALHRSY   | 0,6806 |
| A01 A24 | HLA-A*29:10 | 257  | GWTAGAAAY   | 0,5826 |
| A01 A24 | HLA-A*29:10 | 257  | GWTAGAAAYY  | 0,6803 |
| A01 A24 | HLA-A*29:10 | 258  | WTAGAAAYY   | 0,9403 |
| A01 A24 | HLA-A*29:10 | 261  | GAAAYYVGY   | 0,7714 |
| A01 A24 | HLA-A*29:10 | 360  | NCVADYSVLY  | 0,6347 |
| A01 A24 | HLA-A*29:10 | 361  | CVADYSVLY   | 0,9086 |
| A01 A24 | HLA-A*29:10 | 444  | KVGGNYNYLY  | 0,5931 |
| A01 A24 | HLA-A*29:10 | 445  | VGGNYNYLY   | 0,6436 |
| A01 A24 | HLA-A*29:10 | 496  | GFQPTNGVGY  | 0,6858 |
| A01 A24 | HLA-A*29:10 | 604  | TSNQVAVLY   | 0,8854 |
| A01 A24 | HLA-A*29:10 | 628  | QLTPTWRVY   | 0,51   |
| A01 A24 | HLA-A*29:10 | 686  | SVASQSIIAY  | 0,6064 |
| A01 A24 | HLA-A*29:10 | 687  | VASQSIIAY   | 0,6791 |
| A01 A24 | HLA-A*29:10 | 781  | VFAQVKQIY   | 0,9197 |
| A01 A24 | HLA-A*29:10 | 827  | TLADAGFIKQY | 0,5983 |
| A01 A24 | HLA-A*29:10 | 865  | LTDEMIAQY   | 0,819  |
| A01 A24 | HLA-A*29:10 | 896  | IPFAMQMAY   | 0,5343 |
| A01 A24 | HLA-A*29:10 | 909  | IGVTQNVLY   | 0,5165 |
| A01 A24 | HLA-A*29:10 | 1059 | GVVFLHVTY   | 0,7218 |
| A01 A24 | HLA-A*29:10 | 1102 | WFVTQRNFY   | 0,7439 |
| A01 A24 | HLA-A*29:10 | 1147 | SFKEELDKY   | 0,6923 |
| A01 A24 | HLA-A*29:10 | 1264 | VLKGVKLHY   | 0,8598 |
| A01 A24 | HLA-A*29:11 | 30   | NSFTRGVYY   | 0,825  |
| A01 A24 | HLA-A*29:11 | 151  | SWMESEFRVY  | 0,7114 |
| A01 A24 | HLA-A*29:11 | 162  | SANNCTFEY   | 0,7814 |
| A01 A24 | HLA-A*29:11 | 192  | FVFKNIDGY   | 0,9181 |
| A01 A24 | HLA-A*29:11 | 240  | TLLALHRSY   | 0,6806 |
| A01 A24 | HLA-A*29:11 | 257  | GWTAGAAAY   | 0,5826 |
| A01 A24 | HLA-A*29:11 | 257  | GWTAGAAAYY  | 0,6803 |
| A01 A24 | HLA-A*29:11 | 258  | WTAGAAAYY   | 0,9403 |
| A01 A24 | HLA-A*29:11 | 261  | GAAAYYVGY   | 0,7714 |
| A01 A24 | HLA-A*29:11 | 360  | NCVADYSVLY  | 0,6347 |
| A01 A24 | HLA-A*29:11 | 361  | CVADYSVLY   | 0,9086 |
| A01 A24 | HLA-A*29:11 | 444  | KVGGNYNYLY  | 0,5931 |
| A01 A24 | HLA-A*29:11 | 445  | VGGNYNYLY   | 0,6436 |
| A01 A24 | HLA-A*29:11 | 496  | GFQPTNGVGY  | 0,6858 |
| A01 A24 | HLA-A*29:11 | 604  | TSNQVAVLY   | 0,8854 |
| A01 A24 | HLA-A*29:11 | 628  | QLTPTWRVY   | 0,51   |
| A01 A24 | HLA-A*29:11 | 686  | SVASQSIIAY  | 0,6064 |
| A01 A24 | HLA-A*29:11 | 687  | VASQSIIAY   | 0,6791 |
| A01 A24 | HLA-A*29:11 | 781  | VFAQVKQIY   | 0,9197 |
| A01 A24 | HLA-A*29:11 | 827  | TLADAGFIKQY | 0,5983 |
| A01 A24 | HLA-A*29:11 | 865  | LTDEMIAQY   | 0,819  |
| A01 A24 | HLA-A*29:11 | 896  | IPFAMQMAY   | 0,5343 |
| A01 A24 | HLA-A*29:11 | 909  | IGVTQNVLY   | 0,5165 |
| A01 A24 | HLA-A*29:11 | 1059 | GVVFLHVTY   | 0,7218 |
| A01 A24 | HLA-A*29:11 | 1102 | WFVTQRNFY   | 0,7439 |
| A01 A24 | HLA-A*29:11 | 1147 | SFKEELDKY   | 0,6923 |
| A01 A24 | HLA-A*29:11 | 1264 | VLKGVKLHY   | 0,8598 |

|         |             |      |             |        |
|---------|-------------|------|-------------|--------|
| A01 A24 | HLA-A*29:12 | 30   | NSFTRGVYY   | 0,825  |
| A01 A24 | HLA-A*29:12 | 151  | SWMESEFRVY  | 0,7114 |
| A01 A24 | HLA-A*29:12 | 162  | SANNCTFEY   | 0,7814 |
| A01 A24 | HLA-A*29:12 | 192  | FVFKNIDGY   | 0,9181 |
| A01 A24 | HLA-A*29:12 | 240  | TLLALHRSY   | 0,6806 |
| A01 A24 | HLA-A*29:12 | 257  | GWTAGAAAY   | 0,5826 |
| A01 A24 | HLA-A*29:12 | 257  | GWTAGAAAYY  | 0,6803 |
| A01 A24 | HLA-A*29:12 | 258  | WTAGAAAYY   | 0,9403 |
| A01 A24 | HLA-A*29:12 | 261  | GAAAYYVGY   | 0,7714 |
| A01 A24 | HLA-A*29:12 | 360  | NCVADYSVLY  | 0,6347 |
| A01 A24 | HLA-A*29:12 | 361  | CVADYSVLY   | 0,9086 |
| A01 A24 | HLA-A*29:12 | 444  | KVGGNYNYLY  | 0,5931 |
| A01 A24 | HLA-A*29:12 | 445  | VGGNYNYLY   | 0,6436 |
| A01 A24 | HLA-A*29:12 | 496  | GFQPTNGVGY  | 0,6858 |
| A01 A24 | HLA-A*29:12 | 604  | TSNQVAVLY   | 0,8854 |
| A01 A24 | HLA-A*29:12 | 628  | QLTPTWRVY   | 0,51   |
| A01 A24 | HLA-A*29:12 | 686  | SVASQSIIAY  | 0,6064 |
| A01 A24 | HLA-A*29:12 | 687  | VASQSIIAY   | 0,6791 |
| A01 A24 | HLA-A*29:12 | 781  | VFAQVKQIY   | 0,9197 |
| A01 A24 | HLA-A*29:12 | 827  | TLADAGFIKQY | 0,5983 |
| A01 A24 | HLA-A*29:12 | 865  | LTDEMIAQY   | 0,819  |
| A01 A24 | HLA-A*29:12 | 896  | IPFAMQMAY   | 0,5343 |
| A01 A24 | HLA-A*29:12 | 909  | IGVTQNVLY   | 0,5165 |
| A01 A24 | HLA-A*29:12 | 1059 | GVVFLHVTY   | 0,7218 |
| A01 A24 | HLA-A*29:12 | 1102 | WFVTQRNFY   | 0,7439 |
| A01 A24 | HLA-A*29:12 | 1147 | SFKEELDKY   | 0,6923 |
| A01 A24 | HLA-A*29:12 | 1264 | VLKGVKLHY   | 0,8598 |
| A02     | HLA-A*02:01 | 109  | TLDSKTQSL   | 0,6782 |
| A02     | HLA-A*02:01 | 133  | FQFCNDPFL   | 0,518  |
| A02     | HLA-A*02:01 | 269  | YLQPRTFLL   | 0,973  |
| A02     | HLA-A*02:01 | 386  | KLNDLCFTNV  | 0,7108 |
| A02     | HLA-A*02:01 | 417  | KIADYNYKL   | 0,909  |
| A02     | HLA-A*02:01 | 424  | KLPDDFTGCV  | 0,5916 |
| A02     | HLA-A*02:01 | 515  | FELLHAPATV  | 0,6033 |
| A02     | HLA-A*02:01 | 610  | VLYQDVNCTEV | 0,5092 |
| A02     | HLA-A*02:01 | 691  | SIIAYTMSL   | 0,7995 |
| A02     | HLA-A*02:01 | 718  | FTISVTTEI   | 0,5257 |
| A02     | HLA-A*02:01 | 821  | LLFNKVTLA   | 0,7857 |
| A02     | HLA-A*02:01 | 857  | GLTVLPPLL   | 0,6786 |
| A02     | HLA-A*02:01 | 915  | VLYENQKLI   | 0,5378 |
| A02     | HLA-A*02:01 | 975  | SVLNDILSRL  | 0,5124 |
| A02     | HLA-A*02:01 | 976  | VLNDILSRL   | 0,9507 |
| A02     | HLA-A*02:01 | 983  | RLDKVEAEV   | 0,8609 |
| A02     | HLA-A*02:01 | 1000 | RLQSLQTYV   | 0,7431 |
| A02     | HLA-A*02:01 | 1047 | YHLMSFPQSA  | 0,5452 |
| A02     | HLA-A*02:01 | 1048 | HLMSFPQSA   | 0,7385 |
| A02     | HLA-A*02:01 | 1060 | VVFLHVITYV  | 0,6948 |
| A02     | HLA-A*02:01 | 1185 | RLNEVAKNL   | 0,6189 |
| A02     | HLA-A*02:01 | 1192 | NLNESLIDL   | 0,6972 |
| A02     | HLA-A*02:01 | 1220 | FIAGLIAIV   | 0,8207 |

|     |             |      |             |        |
|-----|-------------|------|-------------|--------|
| A02 | HLA-A*02:02 | 109  | TLDSKTQSL   | 0,825  |
| A02 | HLA-A*02:02 | 133  | FQFCNDPFL   | 0,5968 |
| A02 | HLA-A*02:02 | 269  | YLQPRTFLL   | 0,9773 |
| A02 | HLA-A*02:02 | 386  | KLNDLCFTNV  | 0,8261 |
| A02 | HLA-A*02:02 | 416  | GKIADYNYKL  | 0,6474 |
| A02 | HLA-A*02:02 | 417  | KIADYNYKL   | 0,9705 |
| A02 | HLA-A*02:02 | 424  | KLPDDFTGCV  | 0,8161 |
| A02 | HLA-A*02:02 | 512  | VLSFELLHA   | 0,5802 |
| A02 | HLA-A*02:02 | 515  | FELLHAPATV  | 0,5863 |
| A02 | HLA-A*02:02 | 691  | SIIAYTMSL   | 0,8402 |
| A02 | HLA-A*02:02 | 718  | FTISVTTEI   | 0,6992 |
| A02 | HLA-A*02:02 | 821  | LLFNKVTLA   | 0,8324 |
| A02 | HLA-A*02:02 | 857  | GLTVLPPLL   | 0,7823 |
| A02 | HLA-A*02:02 | 869  | MIAQYTSAL   | 0,7746 |
| A02 | HLA-A*02:02 | 915  | VLYENQKLI   | 0,6825 |
| A02 | HLA-A*02:02 | 937  | SLSSTASAL   | 0,6944 |
| A02 | HLA-A*02:02 | 947  | KLQDVVNQNA  | 0,5801 |
| A02 | HLA-A*02:02 | 958  | ALNTLVKQL   | 0,8332 |
| A02 | HLA-A*02:02 | 975  | SVLNDILSRL  | 0,878  |
| A02 | HLA-A*02:02 | 976  | VLNDILSRL   | 0,989  |
| A02 | HLA-A*02:02 | 983  | RLDKVEAEV   | 0,8636 |
| A02 | HLA-A*02:02 | 1000 | RLQSLQTYV   | 0,8614 |
| A02 | HLA-A*02:02 | 1047 | YHLMSFPQSA  | 0,6493 |
| A02 | HLA-A*02:02 | 1048 | HLMSFPQSA   | 0,8395 |
| A02 | HLA-A*02:02 | 1060 | VVFLHVTYV   | 0,6976 |
| A02 | HLA-A*02:02 | 1095 | FVSNGTHWV   | 0,621  |
| A02 | HLA-A*02:02 | 1185 | RLNEVAKNL   | 0,9052 |
| A02 | HLA-A*02:02 | 1192 | NLNESLIDL   | 0,8555 |
| A02 | HLA-A*02:02 | 1196 | SLIDLQEL    | 0,7114 |
| A02 | HLA-A*02:02 | 1220 | FIAGLIAIV   | 0,8951 |
| A02 | HLA-A*02:03 | 28   | YTNSFTRGV   | 0,6379 |
| A02 | HLA-A*02:03 | 109  | TLDSKTQSL   | 0,7157 |
| A02 | HLA-A*02:03 | 117  | LLIVNNATNV  | 0,6411 |
| A02 | HLA-A*02:03 | 118  | LIVNNATNV   | 0,6321 |
| A02 | HLA-A*02:03 | 119  | IVNNATNVV   | 0,611  |
| A02 | HLA-A*02:03 | 202  | KIYSKHTPI   | 0,6197 |
| A02 | HLA-A*02:03 | 241  | LLALHRSYL   | 0,6696 |
| A02 | HLA-A*02:03 | 269  | YLQPRTFLL   | 0,9474 |
| A02 | HLA-A*02:03 | 386  | KLNDLCFTNV  | 0,8966 |
| A02 | HLA-A*02:03 | 417  | KIADYNYKL   | 0,8266 |
| A02 | HLA-A*02:03 | 424  | KLPDDFTGCV  | 0,8342 |
| A02 | HLA-A*02:03 | 512  | VLSFELLHA   | 0,6927 |
| A02 | HLA-A*02:03 | 515  | FELLHAPATV  | 0,75   |
| A02 | HLA-A*02:03 | 516  | ELLHAPATV   | 0,6201 |
| A02 | HLA-A*02:03 | 610  | VLYQDVNCTEV | 0,6785 |
| A02 | HLA-A*02:03 | 634  | RVYSTGSNV   | 0,7597 |
| A02 | HLA-A*02:03 | 691  | SIIAYTMSL   | 0,8766 |
| A02 | HLA-A*02:03 | 718  | FTISVTTEI   | 0,7603 |
| A02 | HLA-A*02:03 | 762  | QLNRALTGI   | 0,7873 |
| A02 | HLA-A*02:03 | 821  | LLFNKVTLA   | 0,9477 |

|     |             |      |             |        |
|-----|-------------|------|-------------|--------|
| A02 | HLA-A*02:03 | 869  | MIAQYTSAL   | 0,7884 |
| A02 | HLA-A*02:03 | 915  | VLYENQKLI   | 0,8141 |
| A02 | HLA-A*02:03 | 937  | SLSSTASAL   | 0,7506 |
| A02 | HLA-A*02:03 | 947  | KLQDVVNQNA  | 0,6818 |
| A02 | HLA-A*02:03 | 958  | ALNTLVKQL   | 0,8303 |
| A02 | HLA-A*02:03 | 975  | SVLNDILSRL  | 0,8775 |
| A02 | HLA-A*02:03 | 976  | VLNDILSRL   | 0,986  |
| A02 | HLA-A*02:03 | 983  | RLDKVEAEV   | 0,7407 |
| A02 | HLA-A*02:03 | 995  | RLITGRLQSL  | 0,6909 |
| A02 | HLA-A*02:03 | 1000 | RLQSLQTYV   | 0,9011 |
| A02 | HLA-A*02:03 | 1047 | YHLMSFPQSA  | 0,7925 |
| A02 | HLA-A*02:03 | 1048 | HLMSFPQSA   | 0,9264 |
| A02 | HLA-A*02:03 | 1060 | VVFLHVTYV   | 0,8543 |
| A02 | HLA-A*02:03 | 1171 | GINASVUNI   | 0,7487 |
| A02 | HLA-A*02:03 | 1185 | RLNEVAKNL   | 0,8898 |
| A02 | HLA-A*02:03 | 1192 | NLNESLIDL   | 0,7558 |
| A02 | HLA-A*02:03 | 1220 | FIAGLIAIV   | 0,9522 |
| A02 | HLA-A*02:04 | 269  | YLQPRTFLL   | 0,8826 |
| A02 | HLA-A*02:04 | 417  | KIADYNYKL   | 0,7529 |
| A02 | HLA-A*02:04 | 691  | SIIAYTMSL   | 0,6521 |
| A02 | HLA-A*02:04 | 821  | LLFNKVTLA   | 0,5441 |
| A02 | HLA-A*02:04 | 976  | VLNDILSRL   | 0,7971 |
| A02 | HLA-A*02:04 | 1060 | VVFLHVTYV   | 0,5925 |
| A02 | HLA-A*02:05 | 28   | YTNSFTRGV   | 0,5152 |
| A02 | HLA-A*02:05 | 133  | FQFCNDPFL   | 0,6267 |
| A02 | HLA-A*02:05 | 269  | YLQPRTFLL   | 0,8636 |
| A02 | HLA-A*02:05 | 417  | KIADYNYKL   | 0,9165 |
| A02 | HLA-A*02:05 | 424  | KLPDDFTGCV  | 0,6183 |
| A02 | HLA-A*02:05 | 691  | SIIAYTMSL   | 0,7523 |
| A02 | HLA-A*02:05 | 718  | FTISVTTEI   | 0,7976 |
| A02 | HLA-A*02:05 | 777  | NTQEVFAQV   | 0,5189 |
| A02 | HLA-A*02:05 | 869  | MIAQYTSAL   | 0,6311 |
| A02 | HLA-A*02:05 | 975  | SVLNDILSRL  | 0,5129 |
| A02 | HLA-A*02:05 | 976  | VLNDILSRL   | 0,9314 |
| A02 | HLA-A*02:05 | 1000 | RLQSLQTYV   | 0,5133 |
| A02 | HLA-A*02:05 | 1060 | VVFLHVTYV   | 0,6498 |
| A02 | HLA-A*02:05 | 1185 | RLNEVAKNL   | 0,5946 |
| A02 | HLA-A*02:05 | 1220 | FIAGLIAIV   | 0,7813 |
| A02 | HLA-A*02:06 | 133  | FQFCNDPFL   | 0,7104 |
| A02 | HLA-A*02:06 | 133  | FQFCNDPFLGV | 0,5205 |
| A02 | HLA-A*02:06 | 269  | YLQPRTFLL   | 0,8955 |
| A02 | HLA-A*02:06 | 417  | KIADYNYKL   | 0,9064 |
| A02 | HLA-A*02:06 | 424  | KLPDDFTGCV  | 0,5686 |
| A02 | HLA-A*02:06 | 612  | YQDVNCTEV   | 0,5256 |
| A02 | HLA-A*02:06 | 691  | SIIAYTMSL   | 0,847  |
| A02 | HLA-A*02:06 | 712  | IAIPTNFTI   | 0,5224 |
| A02 | HLA-A*02:06 | 718  | FTISVTTEI   | 0,8184 |
| A02 | HLA-A*02:06 | 721  | SVTTEILPV   | 0,5642 |
| A02 | HLA-A*02:06 | 821  | LLFNKVTLA   | 0,5419 |
| A02 | HLA-A*02:06 | 894  | LQIPFAMQM   | 0,6147 |

|     |             |      |             |        |
|-----|-------------|------|-------------|--------|
| A02 | HLA-A*02:06 | 976  | VLNDILSRL   | 0,8346 |
| A02 | HLA-A*02:06 | 983  | RLDKVEAEV   | 0,6135 |
| A02 | HLA-A*02:06 | 1048 | HLMSFPQSA   | 0,5289 |
| A02 | HLA-A*02:06 | 1060 | VVFLHVTYV   | 0,7813 |
| A02 | HLA-A*02:06 | 1136 | TVYDPLQPEL  | 0,5968 |
| A02 | HLA-A*02:06 | 1220 | FIAGLIAIV   | 0,81   |
| A02 | HLA-A*02:07 | 269  | YLQPRTFLL   | 0,8775 |
| A02 | HLA-A*02:09 | 109  | TLDSKTQSL   | 0,6782 |
| A02 | HLA-A*02:09 | 133  | FQFCNDPFL   | 0,518  |
| A02 | HLA-A*02:09 | 269  | YLQPRTFLL   | 0,973  |
| A02 | HLA-A*02:09 | 386  | KLNDLCFTNV  | 0,7108 |
| A02 | HLA-A*02:09 | 417  | KIADYNYKL   | 0,909  |
| A02 | HLA-A*02:09 | 424  | KLPDDFTGCV  | 0,5916 |
| A02 | HLA-A*02:09 | 515  | FELLHAPATV  | 0,6033 |
| A02 | HLA-A*02:09 | 610  | VLYQDVNCTEV | 0,5092 |
| A02 | HLA-A*02:09 | 691  | SIIAYTMSL   | 0,7995 |
| A02 | HLA-A*02:09 | 718  | FTISVTTEI   | 0,5257 |
| A02 | HLA-A*02:09 | 821  | LLFNKVTLA   | 0,7857 |
| A02 | HLA-A*02:09 | 857  | GLTVLPPLL   | 0,6786 |
| A02 | HLA-A*02:09 | 915  | VLYENQKLI   | 0,5378 |
| A02 | HLA-A*02:09 | 975  | SVLNDILSRL  | 0,5124 |
| A02 | HLA-A*02:09 | 976  | VLNDILSRL   | 0,9507 |
| A02 | HLA-A*02:09 | 983  | RLDKVEAEV   | 0,8609 |
| A02 | HLA-A*02:09 | 1000 | RLQSLQTYV   | 0,7431 |
| A02 | HLA-A*02:09 | 1047 | YHLMSFPQSA  | 0,5452 |
| A02 | HLA-A*02:09 | 1048 | HLMSFPQSA   | 0,7385 |
| A02 | HLA-A*02:09 | 1060 | VVFLHVTYV   | 0,6948 |
| A02 | HLA-A*02:09 | 1185 | RLNEVAKNL   | 0,6189 |
| A02 | HLA-A*02:09 | 1192 | NLNESLIDL   | 0,6972 |
| A02 | HLA-A*02:09 | 1220 | FIAGLIAIV   | 0,8207 |
| A02 | HLA-A*02:11 | 109  | TLDSKTQSL   | 0,8988 |
| A02 | HLA-A*02:11 | 269  | YLQPRTFLL   | 0,9932 |
| A02 | HLA-A*02:11 | 386  | KLNDLCFTNV  | 0,8871 |
| A02 | HLA-A*02:11 | 417  | KIADYNYKL   | 0,97   |
| A02 | HLA-A*02:11 | 424  | KLPDDFTGCV  | 0,7417 |
| A02 | HLA-A*02:11 | 515  | FELLHAPATV  | 0,7889 |
| A02 | HLA-A*02:11 | 610  | VLYQDVNCTEV | 0,6974 |
| A02 | HLA-A*02:11 | 691  | SIIAYTMSL   | 0,9432 |
| A02 | HLA-A*02:11 | 718  | FTISVTTEI   | 0,8216 |
| A02 | HLA-A*02:11 | 821  | LLFNKVTLA   | 0,9443 |
| A02 | HLA-A*02:11 | 857  | GLTVLPPLL   | 0,7856 |
| A02 | HLA-A*02:11 | 915  | VLYENQKLI   | 0,8632 |
| A02 | HLA-A*02:11 | 958  | ALNTLVKQL   | 0,8141 |
| A02 | HLA-A*02:11 | 975  | SVLNDILSRL  | 0,7945 |
| A02 | HLA-A*02:11 | 976  | VLNDILSRL   | 0,9917 |
| A02 | HLA-A*02:11 | 983  | RLDKVEAEV   | 0,9677 |
| A02 | HLA-A*02:11 | 1000 | RLQSLQTYV   | 0,9419 |
| A02 | HLA-A*02:11 | 1047 | YHLMSFPQSA  | 0,7518 |
| A02 | HLA-A*02:11 | 1048 | HLMSFPQSA   | 0,9136 |
| A02 | HLA-A*02:11 | 1060 | VVFLHVTYV   | 0,8865 |

|     |             |      |             |        |
|-----|-------------|------|-------------|--------|
| A02 | HLA-A*02:11 | 1171 | GINASVVNI   | 0,7552 |
| A02 | HLA-A*02:11 | 1185 | RLNEVAKNL   | 0,9099 |
| A02 | HLA-A*02:11 | 1192 | NLNESLIDL   | 0,8952 |
| A02 | HLA-A*02:11 | 1220 | FIAGLIAIV   | 0,9533 |
| A02 | HLA-A*02:12 | 109  | TLDSKTQSL   | 0,8428 |
| A02 | HLA-A*02:12 | 269  | YLQPRTFLL   | 0,9818 |
| A02 | HLA-A*02:12 | 386  | KLNDLCFTNV  | 0,7871 |
| A02 | HLA-A*02:12 | 417  | KIADYNYKL   | 0,9054 |
| A02 | HLA-A*02:12 | 424  | KLPDDFTGCV  | 0,6822 |
| A02 | HLA-A*02:12 | 515  | FELLHAPATV  | 0,681  |
| A02 | HLA-A*02:12 | 610  | VLYQDVNCTEV | 0,5467 |
| A02 | HLA-A*02:12 | 691  | SIIAYTMSL   | 0,7857 |
| A02 | HLA-A*02:12 | 718  | FTISVTTEI   | 0,5137 |
| A02 | HLA-A*02:12 | 821  | LLFNKVTLA   | 0,8068 |
| A02 | HLA-A*02:12 | 857  | GLTVLPPLL   | 0,6662 |
| A02 | HLA-A*02:12 | 915  | VLYENQKLI   | 0,6143 |
| A02 | HLA-A*02:12 | 958  | ALNTLVKQL   | 0,608  |
| A02 | HLA-A*02:12 | 975  | SVLNDILSRL  | 0,6353 |
| A02 | HLA-A*02:12 | 976  | VLNDILSRL   | 0,9646 |
| A02 | HLA-A*02:12 | 983  | RLDKVEAEV   | 0,9238 |
| A02 | HLA-A*02:12 | 1000 | RLQSLQTYV   | 0,8752 |
| A02 | HLA-A*02:12 | 1047 | YHLMSFPQSA  | 0,6061 |
| A02 | HLA-A*02:12 | 1048 | HLMSFPQSA   | 0,7977 |
| A02 | HLA-A*02:12 | 1060 | VVFLHVITYV  | 0,6387 |
| A02 | HLA-A*02:12 | 1185 | RLNEVAKNL   | 0,7519 |
| A02 | HLA-A*02:12 | 1192 | NLNESLIDL   | 0,8032 |
| A02 | HLA-A*02:12 | 1196 | SLIDLQEL    | 0,5049 |
| A02 | HLA-A*02:12 | 1220 | FIAGLIAIV   | 0,8684 |
| A02 | HLA-A*02:13 | 109  | TLDSKTQSL   | 0,6983 |
| A02 | HLA-A*02:13 | 269  | YLQPRTFLL   | 0,941  |
| A02 | HLA-A*02:13 | 386  | KLNDLCFTNV  | 0,8077 |
| A02 | HLA-A*02:13 | 417  | KIADYNYKL   | 0,6473 |
| A02 | HLA-A*02:13 | 424  | KLPDDFTGCV  | 0,6563 |
| A02 | HLA-A*02:13 | 515  | FELLHAPATV  | 0,6753 |
| A02 | HLA-A*02:13 | 610  | VLYQDVNCTEV | 0,5488 |
| A02 | HLA-A*02:13 | 634  | RVYSTGSNV   | 0,5202 |
| A02 | HLA-A*02:13 | 691  | SIIAYTMSL   | 0,7124 |
| A02 | HLA-A*02:13 | 762  | QLNRALTGI   | 0,5324 |
| A02 | HLA-A*02:13 | 821  | LLFNKVTLA   | 0,8697 |
| A02 | HLA-A*02:13 | 915  | VLYENQKLI   | 0,7047 |
| A02 | HLA-A*02:13 | 937  | SLSSTASAL   | 0,5679 |
| A02 | HLA-A*02:13 | 958  | ALNTLVKQL   | 0,6032 |
| A02 | HLA-A*02:13 | 975  | SVLNDILSRL  | 0,6032 |
| A02 | HLA-A*02:13 | 976  | VLNDILSRL   | 0,945  |
| A02 | HLA-A*02:13 | 983  | RLDKVEAEV   | 0,7965 |
| A02 | HLA-A*02:13 | 1000 | RLQSLQTYV   | 0,8865 |
| A02 | HLA-A*02:13 | 1047 | YHLMSFPQSA  | 0,5921 |
| A02 | HLA-A*02:13 | 1048 | HLMSFPQSA   | 0,8168 |
| A02 | HLA-A*02:13 | 1060 | VVFLHVITYV  | 0,6866 |
| A02 | HLA-A*02:13 | 1171 | GINASVVNI   | 0,5495 |

|     |             |      |              |        |
|-----|-------------|------|--------------|--------|
| A02 | HLA-A*02:13 | 1185 | RLNEVAKNL    | 0,7327 |
| A02 | HLA-A*02:13 | 1192 | NLNESLIDL    | 0,6257 |
| A02 | HLA-A*02:13 | 1220 | FIAGLIAIV    | 0,8509 |
| A02 | HLA-A*02:14 | 133  | FQFCNDPFL    | 0,6515 |
| A02 | HLA-A*02:14 | 269  | YLQPRTFLL    | 0,8753 |
| A02 | HLA-A*02:14 | 417  | KIADYNYKL    | 0,8777 |
| A02 | HLA-A*02:14 | 424  | KLPDDFTGCV   | 0,5064 |
| A02 | HLA-A*02:14 | 691  | SIIAYTMSL    | 0,7378 |
| A02 | HLA-A*02:14 | 718  | FTISVTTEI    | 0,6932 |
| A02 | HLA-A*02:14 | 894  | LQIPFAMQM    | 0,5806 |
| A02 | HLA-A*02:14 | 976  | VLNDILSRL    | 0,8034 |
| A02 | HLA-A*02:14 | 983  | RLDKVEAEV    | 0,5388 |
| A02 | HLA-A*02:14 | 1060 | VVFLHVITYV   | 0,6298 |
| A02 | HLA-A*02:14 | 1220 | FIAGLIAIV    | 0,6444 |
| A02 | HLA-A*02:16 | 109  | TLDSKTQSL    | 0,7274 |
| A02 | HLA-A*02:16 | 133  | FQFCNDPFL    | 0,6062 |
| A02 | HLA-A*02:16 | 222  | ALEPLVDLPIGI | 0,5004 |
| A02 | HLA-A*02:16 | 269  | YLQPRTFLL    | 0,9796 |
| A02 | HLA-A*02:16 | 386  | KLNDLCFTNV   | 0,7336 |
| A02 | HLA-A*02:16 | 417  | KIADYNYKL    | 0,9083 |
| A02 | HLA-A*02:16 | 424  | KLPDDFTGCV   | 0,6179 |
| A02 | HLA-A*02:16 | 515  | FELLHAPATV   | 0,7196 |
| A02 | HLA-A*02:16 | 610  | VLYQDVNCTEV  | 0,6397 |
| A02 | HLA-A*02:16 | 691  | SIIAYTMSL    | 0,8424 |
| A02 | HLA-A*02:16 | 718  | FTISVTTEI    | 0,6337 |
| A02 | HLA-A*02:16 | 821  | LLFNKVTLA    | 0,8492 |
| A02 | HLA-A*02:16 | 857  | GLTVLPPLL    | 0,7288 |
| A02 | HLA-A*02:16 | 915  | VLYENQKLI    | 0,6401 |
| A02 | HLA-A*02:16 | 958  | ALNTLVKQL    | 0,5125 |
| A02 | HLA-A*02:16 | 975  | SVLNDILSRL   | 0,55   |
| A02 | HLA-A*02:16 | 976  | VLNDILSRL    | 0,953  |
| A02 | HLA-A*02:16 | 983  | RLDKVEAEV    | 0,9079 |
| A02 | HLA-A*02:16 | 1000 | RLQSLQTYV    | 0,8152 |
| A02 | HLA-A*02:16 | 1047 | YHLMSFPQSA   | 0,6323 |
| A02 | HLA-A*02:16 | 1048 | HLMSFPQSA    | 0,8072 |
| A02 | HLA-A*02:16 | 1060 | VVFLHVITYV   | 0,7386 |
| A02 | HLA-A*02:16 | 1185 | RLNEVAKNL    | 0,6572 |
| A02 | HLA-A*02:16 | 1192 | NLNESLIDL    | 0,7695 |
| A02 | HLA-A*02:16 | 1220 | FIAGLIAIV    | 0,8906 |
| A02 | HLA-A*02:17 | 269  | YLQPRTFLL    | 0,8989 |
| A02 | HLA-A*02:17 | 417  | KIADYNYKL    | 0,7084 |
| A02 | HLA-A*02:17 | 691  | SIIAYTMSL    | 0,5715 |
| A02 | HLA-A*02:17 | 976  | VLNDILSRL    | 0,7759 |
| A02 | HLA-A*02:18 | 269  | YLQPRTFLL    | 0,8775 |
| A02 | HLA-A*02:19 | 109  | TLDSKTQSL    | 0,8021 |
| A02 | HLA-A*02:19 | 269  | YLQPRTFLL    | 0,9638 |
| A02 | HLA-A*02:19 | 386  | KLNDLCFTNV   | 0,6484 |
| A02 | HLA-A*02:19 | 417  | KIADYNYKL    | 0,7644 |
| A02 | HLA-A*02:19 | 424  | KLPDDFTGCV   | 0,5568 |
| A02 | HLA-A*02:19 | 515  | FELLHAPATV   | 0,5795 |



|     |             |      |             |        |
|-----|-------------|------|-------------|--------|
| A02 | HLA-A*02:19 | 516  | ELLHAPATV   | 0,6189 |
| A02 | HLA-A*02:19 | 691  | SIIAYTMSL   | 0,6332 |
| A02 | HLA-A*02:19 | 821  | LLFNKVTLA   | 0,6129 |
| A02 | HLA-A*02:19 | 975  | SVLNDILSRL  | 0,5189 |
| A02 | HLA-A*02:19 | 976  | VLNDILSRL   | 0,9385 |
| A02 | HLA-A*02:19 | 983  | RLDKVEAEV   | 0,8427 |
| A02 | HLA-A*02:19 | 1000 | RLQSLQTYV   | 0,7225 |
| A02 | HLA-A*02:19 | 1048 | HLMSFPQSA   | 0,6609 |
| A02 | HLA-A*02:19 | 1185 | RLNEVAKNL   | 0,5986 |
| A02 | HLA-A*02:19 | 1192 | NLNESLIDL   | 0,8007 |
| A02 | HLA-A*02:19 | 1220 | FIAGLIAIV   | 0,8159 |
| A02 | HLA-A*02:20 | 269  | YLQPRTFLL   | 0,9372 |
| A02 | HLA-A*02:20 | 386  | KLNDLCFTNV  | 0,609  |
| A02 | HLA-A*02:20 | 417  | KIADYNYKL   | 0,8535 |
| A02 | HLA-A*02:20 | 691  | SIIAYTMSL   | 0,7417 |
| A02 | HLA-A*02:20 | 718  | FTISVTTEI   | 0,5048 |
| A02 | HLA-A*02:20 | 821  | LLFNKVTLA   | 0,6533 |
| A02 | HLA-A*02:20 | 857  | GLTVLPPLL   | 0,5648 |
| A02 | HLA-A*02:20 | 976  | VLNDILSRL   | 0,883  |
| A02 | HLA-A*02:20 | 983  | RLDKVEAEV   | 0,7865 |
| A02 | HLA-A*02:20 | 1000 | RLQSLQTYV   | 0,6742 |
| A02 | HLA-A*02:20 | 1048 | HLMSFPQSA   | 0,6259 |
| A02 | HLA-A*02:20 | 1060 | VVFLHVTYV   | 0,6374 |
| A02 | HLA-A*02:20 | 1192 | NLNESLIDL   | 0,5432 |
| A02 | HLA-A*02:20 | 1220 | FIAGLIAIV   | 0,6882 |
| A02 | HLA-A*02:21 | 133  | FQFCNDPFL   | 0,7104 |
| A02 | HLA-A*02:21 | 133  | FQFCNDPFLGV | 0,5205 |
| A02 | HLA-A*02:21 | 269  | YLQPRTFLL   | 0,8955 |
| A02 | HLA-A*02:21 | 417  | KIADYNYKL   | 0,9064 |
| A02 | HLA-A*02:21 | 424  | KLPDDFTGCV  | 0,5686 |
| A02 | HLA-A*02:21 | 612  | YQDVNCTEV   | 0,5256 |
| A02 | HLA-A*02:21 | 691  | SIIAYTMSL   | 0,847  |
| A02 | HLA-A*02:21 | 712  | IAIPTNFTI   | 0,5224 |
| A02 | HLA-A*02:21 | 718  | FTISVTTEI   | 0,8184 |
| A02 | HLA-A*02:21 | 721  | SVTTEILPV   | 0,5642 |
| A02 | HLA-A*02:21 | 821  | LLFNKVTLA   | 0,5419 |
| A02 | HLA-A*02:21 | 894  | LQIPFAMQM   | 0,6147 |
| A02 | HLA-A*02:21 | 976  | VLNDILSRL   | 0,8346 |
| A02 | HLA-A*02:21 | 983  | RLDKVEAEV   | 0,6135 |
| A02 | HLA-A*02:21 | 1048 | HLMSFPQSA   | 0,5289 |
| A02 | HLA-A*02:21 | 1060 | VVFLHVTYV   | 0,7813 |
| A02 | HLA-A*02:21 | 1136 | TVYDPLQPEL  | 0,5968 |
| A02 | HLA-A*02:21 | 1220 | FIAGLIAIV   | 0,81   |
| A02 | HLA-A*02:22 | 109  | TLDSKTQSL   | 0,8377 |
| A02 | HLA-A*02:22 | 133  | FQFCNDPFL   | 0,6508 |
| A02 | HLA-A*02:22 | 269  | YLQPRTFLL   | 0,9799 |
| A02 | HLA-A*02:22 | 386  | KLNDLCFTNV  | 0,8656 |
| A02 | HLA-A*02:22 | 417  | KIADYNYKL   | 0,9698 |
| A02 | HLA-A*02:22 | 424  | KLPDDFTGCV  | 0,831  |
| A02 | HLA-A*02:22 | 512  | VLSFELLHA   | 0,665  |

|     |             |      |             |        |
|-----|-------------|------|-------------|--------|
| A02 | HLA-A*02:22 | 515  | FELLHAPATV  | 0,7224 |
| A02 | HLA-A*02:22 | 610  | VLYQDVNCTEV | 0,651  |
| A02 | HLA-A*02:22 | 691  | SIIAYTMSL   | 0,882  |
| A02 | HLA-A*02:22 | 718  | FTISVTTEI   | 0,8007 |
| A02 | HLA-A*02:22 | 762  | QLNRALTGI   | 0,6498 |
| A02 | HLA-A*02:22 | 821  | LLFNKVTLA   | 0,9056 |
| A02 | HLA-A*02:22 | 857  | GLTVLPPLL   | 0,7806 |
| A02 | HLA-A*02:22 | 869  | MIAQYTSAL   | 0,8034 |
| A02 | HLA-A*02:22 | 915  | VLYENQKLI   | 0,746  |
| A02 | HLA-A*02:22 | 937  | SLSSTASAL   | 0,7146 |
| A02 | HLA-A*02:22 | 947  | KLQDVVNQNA  | 0,6761 |
| A02 | HLA-A*02:22 | 958  | ALNTLVKQL   | 0,8347 |
| A02 | HLA-A*02:22 | 975  | SVLNDILSRL  | 0,8914 |
| A02 | HLA-A*02:22 | 976  | VLNDILSRL   | 0,9899 |
| A02 | HLA-A*02:22 | 983  | RLDKVEAEV   | 0,8989 |
| A02 | HLA-A*02:22 | 1000 | RLQSLQTYV   | 0,9071 |
| A02 | HLA-A*02:22 | 1047 | YHLMSFPQSA  | 0,7592 |
| A02 | HLA-A*02:22 | 1048 | HLMSFPQSA   | 0,902  |
| A02 | HLA-A*02:22 | 1060 | VVFLHVITYV  | 0,7982 |
| A02 | HLA-A*02:22 | 1095 | FVSNGTHWV   | 0,6858 |
| A02 | HLA-A*02:22 | 1171 | GINASVUNI   | 0,6497 |
| A02 | HLA-A*02:22 | 1185 | RLNEVAKNL   | 0,8958 |
| A02 | HLA-A*02:22 | 1192 | NLNEIDL     | 0,8894 |
| A02 | HLA-A*02:22 | 1196 | SLIDLQEL    | 0,7342 |
| A02 | HLA-A*02:22 | 1220 | FIAGLIAIV   | 0,9461 |
| A02 | HLA-A*02:24 | 109  | TLDSKTQSL   | 0,6782 |
| A02 | HLA-A*02:24 | 133  | FQFCNDPFL   | 0,518  |
| A02 | HLA-A*02:24 | 269  | YLQPRTFLL   | 0,973  |
| A02 | HLA-A*02:24 | 386  | KLNDLCFTNV  | 0,7108 |
| A02 | HLA-A*02:24 | 417  | KIADYNYKL   | 0,909  |
| A02 | HLA-A*02:24 | 424  | KLPDDFTGCV  | 0,5916 |
| A02 | HLA-A*02:24 | 515  | FELLHAPATV  | 0,6033 |
| A02 | HLA-A*02:24 | 610  | VLYQDVNCTEV | 0,5092 |
| A02 | HLA-A*02:24 | 691  | SIIAYTMSL   | 0,7995 |
| A02 | HLA-A*02:24 | 718  | FTISVTTEI   | 0,5257 |
| A02 | HLA-A*02:24 | 821  | LLFNKVTLA   | 0,7857 |
| A02 | HLA-A*02:24 | 857  | GLTVLPPLL   | 0,6786 |
| A02 | HLA-A*02:24 | 915  | VLYENQKLI   | 0,5378 |
| A02 | HLA-A*02:24 | 975  | SVLNDILSRL  | 0,5124 |
| A02 | HLA-A*02:24 | 976  | VLNDILSRL   | 0,9507 |
| A02 | HLA-A*02:24 | 983  | RLDKVEAEV   | 0,8609 |
| A02 | HLA-A*02:24 | 1000 | RLQSLQTYV   | 0,7431 |
| A02 | HLA-A*02:24 | 1047 | YHLMSFPQSA  | 0,5452 |
| A02 | HLA-A*02:24 | 1048 | HLMSFPQSA   | 0,7385 |
| A02 | HLA-A*02:24 | 1060 | VVFLHVITYV  | 0,6948 |
| A02 | HLA-A*02:24 | 1185 | RLNEVAKNL   | 0,6189 |
| A02 | HLA-A*02:24 | 1192 | NLNEIDL     | 0,6972 |
| A02 | HLA-A*02:24 | 1220 | FIAGLIAIV   | 0,8207 |
| A02 | HLA-A*02:25 | 109  | TLDSKTQSL   | 0,6782 |
| A02 | HLA-A*02:25 | 133  | FQFCNDPFL   | 0,518  |

|     |             |      |             |        |
|-----|-------------|------|-------------|--------|
| A02 | HLA-A*02:25 | 269  | YLQPRTFLL   | 0,973  |
| A02 | HLA-A*02:25 | 386  | KLNDLCFTNV  | 0,7108 |
| A02 | HLA-A*02:25 | 417  | KIADYNYKL   | 0,909  |
| A02 | HLA-A*02:25 | 424  | KLPDDFTGCV  | 0,5916 |
| A02 | HLA-A*02:25 | 515  | FELLHAPATV  | 0,6033 |
| A02 | HLA-A*02:25 | 610  | VLYQDVNCTEV | 0,5092 |
| A02 | HLA-A*02:25 | 691  | SIIAYTMSL   | 0,7995 |
| A02 | HLA-A*02:25 | 718  | FTISVTTEI   | 0,5257 |
| A02 | HLA-A*02:25 | 821  | LLFNKVTLA   | 0,7857 |
| A02 | HLA-A*02:25 | 857  | GLTVLPPLL   | 0,6786 |
| A02 | HLA-A*02:25 | 915  | VLYENQKLI   | 0,5378 |
| A02 | HLA-A*02:25 | 975  | SVLNDILSRL  | 0,5124 |
| A02 | HLA-A*02:25 | 976  | VLNDILSRL   | 0,9507 |
| A02 | HLA-A*02:25 | 983  | RLDKVEAEV   | 0,8609 |
| A02 | HLA-A*02:25 | 1000 | RLQSLQTYV   | 0,7431 |
| A02 | HLA-A*02:25 | 1047 | YHLMSFPQSA  | 0,5452 |
| A02 | HLA-A*02:25 | 1048 | HLMSFPQSA   | 0,7385 |
| A02 | HLA-A*02:25 | 1060 | VVFLHVTYV   | 0,6948 |
| A02 | HLA-A*02:25 | 1185 | RLNEVAKNL   | 0,6189 |
| A02 | HLA-A*02:25 | 1192 | NLNEGLIDL   | 0,6972 |
| A02 | HLA-A*02:25 | 1220 | FIAGLIAIV   | 0,8207 |
| A02 | HLA-A*02:26 | 269  | YLQPRTFLL   | 0,9227 |
| A02 | HLA-A*02:26 | 386  | KLNDLCFTNV  | 0,779  |
| A02 | HLA-A*02:26 | 417  | KIADYNYKL   | 0,6418 |
| A02 | HLA-A*02:26 | 424  | KLPDDFTGCV  | 0,6197 |
| A02 | HLA-A*02:26 | 515  | FELLHAPATV  | 0,6456 |
| A02 | HLA-A*02:26 | 610  | VLYQDVNCTEV | 0,564  |
| A02 | HLA-A*02:26 | 634  | RVYSTGSNV   | 0,5791 |
| A02 | HLA-A*02:26 | 691  | SIIAYTMSL   | 0,75   |
| A02 | HLA-A*02:26 | 718  | FTISVTTEI   | 0,5223 |
| A02 | HLA-A*02:26 | 821  | LLFNKVTLA   | 0,8849 |
| A02 | HLA-A*02:26 | 915  | VLYENQKLI   | 0,6862 |
| A02 | HLA-A*02:26 | 975  | SVLNDILSRL  | 0,5439 |
| A02 | HLA-A*02:26 | 976  | VLNDILSRL   | 0,9394 |
| A02 | HLA-A*02:26 | 983  | RLDKVEAEV   | 0,7333 |
| A02 | HLA-A*02:26 | 1000 | RLQSLQTYV   | 0,7922 |
| A02 | HLA-A*02:26 | 1047 | YHLMSFPQSA  | 0,5858 |
| A02 | HLA-A*02:26 | 1048 | HLMSFPQSA   | 0,8161 |
| A02 | HLA-A*02:26 | 1060 | VVFLHVTYV   | 0,7683 |
| A02 | HLA-A*02:26 | 1171 | GINASVNI    | 0,5171 |
| A02 | HLA-A*02:26 | 1185 | RLNEVAKNL   | 0,664  |
| A02 | HLA-A*02:26 | 1192 | NLNEGLIDL   | 0,524  |
| A02 | HLA-A*02:26 | 1220 | FIAGLIAIV   | 0,8354 |
| A02 | HLA-A*02:27 | 109  | TLDSKTQSL   | 0,7308 |
| A02 | HLA-A*02:27 | 269  | YLQPRTFLL   | 0,9647 |
| A02 | HLA-A*02:27 | 386  | KLNDLCFTNV  | 0,7459 |
| A02 | HLA-A*02:27 | 417  | KIADYNYKL   | 0,7613 |
| A02 | HLA-A*02:27 | 424  | KLPDDFTGCV  | 0,5772 |
| A02 | HLA-A*02:27 | 515  | FELLHAPATV  | 0,627  |
| A02 | HLA-A*02:27 | 610  | VLYQDVNCTEV | 0,514  |

|     |             |      |             |        |
|-----|-------------|------|-------------|--------|
| A02 | HLA-A*02:27 | 691  | SIIAYTMSL   | 0,6826 |
| A02 | HLA-A*02:27 | 821  | LLFNKVTLA   | 0,8062 |
| A02 | HLA-A*02:27 | 857  | GLTVLPPLL   | 0,5289 |
| A02 | HLA-A*02:27 | 915  | VLYENQKLI   | 0,6196 |
| A02 | HLA-A*02:27 | 958  | ALNTLVKQL   | 0,5442 |
| A02 | HLA-A*02:27 | 975  | SVLNDILSRL  | 0,5493 |
| A02 | HLA-A*02:27 | 976  | VLNDILSRL   | 0,9341 |
| A02 | HLA-A*02:27 | 983  | RLDKVEAEV   | 0,8729 |
| A02 | HLA-A*02:27 | 1000 | RLQSLQTYV   | 0,8703 |
| A02 | HLA-A*02:27 | 1047 | YHLMSFPQSA  | 0,5242 |
| A02 | HLA-A*02:27 | 1048 | HLMSFPQSA   | 0,7531 |
| A02 | HLA-A*02:27 | 1060 | VVFLHVTVV   | 0,5815 |
| A02 | HLA-A*02:27 | 1185 | RLNEVAKNL   | 0,685  |
| A02 | HLA-A*02:27 | 1192 | NLNESLIDL   | 0,6819 |
| A02 | HLA-A*02:27 | 1220 | FIAGLIAIV   | 0,798  |
| A02 | HLA-A*02:28 | 133  | FQFCNDPFL   | 0,7104 |
| A02 | HLA-A*02:28 | 133  | FQFCNDPFLGV | 0,5205 |
| A02 | HLA-A*02:28 | 269  | YLQPRTFLL   | 0,8955 |
| A02 | HLA-A*02:28 | 417  | KIADYNYKL   | 0,9064 |
| A02 | HLA-A*02:28 | 424  | KLPDDFTGCV  | 0,5686 |
| A02 | HLA-A*02:28 | 612  | YQDVNCTEV   | 0,5256 |
| A02 | HLA-A*02:28 | 691  | SIIAYTMSL   | 0,847  |
| A02 | HLA-A*02:28 | 712  | IAIPTNFTI   | 0,5224 |
| A02 | HLA-A*02:28 | 718  | FTISVTTEI   | 0,8184 |
| A02 | HLA-A*02:28 | 721  | SVTTEILPV   | 0,5642 |
| A02 | HLA-A*02:28 | 821  | LLFNKVTLA   | 0,5419 |
| A02 | HLA-A*02:28 | 894  | LQIPFAMQM   | 0,6147 |
| A02 | HLA-A*02:28 | 976  | VLNDILSRL   | 0,8346 |
| A02 | HLA-A*02:28 | 983  | RLDKVEAEV   | 0,6135 |
| A02 | HLA-A*02:28 | 1048 | HLMSFPQSA   | 0,5289 |
| A02 | HLA-A*02:28 | 1060 | VVFLHVTVV   | 0,7813 |
| A02 | HLA-A*02:28 | 1136 | TVYDPLQPEL  | 0,5968 |
| A02 | HLA-A*02:28 | 1220 | FIAGLIAIV   | 0,81   |
| A02 | HLA-A*02:30 | 109  | TLDSKTQSL   | 0,6782 |
| A02 | HLA-A*02:30 | 133  | FQFCNDPFL   | 0,518  |
| A02 | HLA-A*02:30 | 269  | YLQPRTFLL   | 0,973  |
| A02 | HLA-A*02:30 | 386  | KLNDLCFTNV  | 0,7108 |
| A02 | HLA-A*02:30 | 417  | KIADYNYKL   | 0,909  |
| A02 | HLA-A*02:30 | 424  | KLPDDFTGCV  | 0,5916 |
| A02 | HLA-A*02:30 | 515  | FELLHAPATV  | 0,6033 |
| A02 | HLA-A*02:30 | 610  | VLYQDVNCTEV | 0,5092 |
| A02 | HLA-A*02:30 | 691  | SIIAYTMSL   | 0,7995 |
| A02 | HLA-A*02:30 | 718  | FTISVTTEI   | 0,5257 |
| A02 | HLA-A*02:30 | 821  | LLFNKVTLA   | 0,7857 |
| A02 | HLA-A*02:30 | 857  | GLTVLPPLL   | 0,6786 |
| A02 | HLA-A*02:30 | 915  | VLYENQKLI   | 0,5378 |
| A02 | HLA-A*02:30 | 975  | SVLNDILSRL  | 0,5124 |
| A02 | HLA-A*02:30 | 976  | VLNDILSRL   | 0,9507 |
| A02 | HLA-A*02:30 | 983  | RLDKVEAEV   | 0,8609 |
| A02 | HLA-A*02:30 | 1000 | RLQSLQTYV   | 0,7431 |

|     |             |      |             |        |
|-----|-------------|------|-------------|--------|
| A02 | HLA-A*02:30 | 1047 | YHLMSFPQSA  | 0,5452 |
| A02 | HLA-A*02:30 | 1048 | HLMSFPQSA   | 0,7385 |
| A02 | HLA-A*02:30 | 1060 | VVFLHVTYV   | 0,6948 |
| A02 | HLA-A*02:30 | 1185 | RLNEVAKNL   | 0,6189 |
| A02 | HLA-A*02:30 | 1192 | NLNESLIDL   | 0,6972 |
| A02 | HLA-A*02:30 | 1220 | FIAGLIAIV   | 0,8207 |
| A02 | HLA-A*02:31 | 109  | TLDSKTQSL   | 0,6782 |
| A02 | HLA-A*02:31 | 133  | FQFCNDPFL   | 0,518  |
| A02 | HLA-A*02:31 | 269  | YLQPRTFLL   | 0,973  |
| A02 | HLA-A*02:31 | 386  | KLNDLCFTNV  | 0,7108 |
| A02 | HLA-A*02:31 | 417  | KIADYNYKL   | 0,909  |
| A02 | HLA-A*02:31 | 424  | KLPDDFTGCV  | 0,5916 |
| A02 | HLA-A*02:31 | 515  | FELLHAPATV  | 0,6033 |
| A02 | HLA-A*02:31 | 610  | VLYQDVNCTEV | 0,5092 |
| A02 | HLA-A*02:31 | 691  | SIIAYTMSL   | 0,7995 |
| A02 | HLA-A*02:31 | 718  | FTISVTTEI   | 0,5257 |
| A02 | HLA-A*02:31 | 821  | LLFNKVTLA   | 0,7857 |
| A02 | HLA-A*02:31 | 857  | GLTVLPPLL   | 0,6786 |
| A02 | HLA-A*02:31 | 915  | VLYENQKLI   | 0,5378 |
| A02 | HLA-A*02:31 | 975  | SVLNDILSRL  | 0,5124 |
| A02 | HLA-A*02:31 | 976  | VLNDILSRL   | 0,9507 |
| A02 | HLA-A*02:31 | 983  | RLDKVEAEV   | 0,8609 |
| A02 | HLA-A*02:31 | 1000 | RLQSLQTYV   | 0,7431 |
| A02 | HLA-A*02:31 | 1047 | YHLMSFPQSA  | 0,5452 |
| A02 | HLA-A*02:31 | 1048 | HLMSFPQSA   | 0,7385 |
| A02 | HLA-A*02:31 | 1060 | VVFLHVTYV   | 0,6948 |
| A02 | HLA-A*02:31 | 1185 | RLNEVAKNL   | 0,6189 |
| A02 | HLA-A*02:31 | 1192 | NLNESLIDL   | 0,6972 |
| A02 | HLA-A*02:31 | 1220 | FIAGLIAIV   | 0,8207 |
| A02 | HLA-A*02:36 | 109  | TLDSKTQSL   | 0,6446 |
| A02 | HLA-A*02:36 | 269  | YLQPRTFLL   | 0,9384 |
| A02 | HLA-A*02:36 | 386  | KLNDLCFTNV  | 0,5465 |
| A02 | HLA-A*02:36 | 417  | KIADYNYKL   | 0,763  |
| A02 | HLA-A*02:36 | 515  | FELLHAPATV  | 0,5014 |
| A02 | HLA-A*02:36 | 516  | ELLHAPATV   | 0,5347 |
| A02 | HLA-A*02:36 | 691  | SIIAYTMSL   | 0,6521 |
| A02 | HLA-A*02:36 | 821  | LLFNKVTLA   | 0,595  |
| A02 | HLA-A*02:36 | 976  | VLNDILSRL   | 0,9103 |
| A02 | HLA-A*02:36 | 983  | RLDKVEAEV   | 0,7362 |
| A02 | HLA-A*02:36 | 1000 | RLQSLQTYV   | 0,5633 |
| A02 | HLA-A*02:36 | 1048 | HLMSFPQSA   | 0,5791 |
| A02 | HLA-A*02:36 | 1060 | VVFLHVTYV   | 0,5499 |
| A02 | HLA-A*02:36 | 1192 | NLNESLIDL   | 0,6714 |
| A02 | HLA-A*02:36 | 1220 | FIAGLIAIV   | 0,7437 |
| A02 | HLA-A*02:38 | 109  | TLDSKTQSL   | 0,6763 |
| A02 | HLA-A*02:38 | 269  | YLQPRTFLL   | 0,8978 |
| A02 | HLA-A*02:38 | 386  | KLNDLCFTNV  | 0,6697 |
| A02 | HLA-A*02:38 | 417  | KIADYNYKL   | 0,6147 |
| A02 | HLA-A*02:38 | 424  | KLPDDFTGCV  | 0,5937 |
| A02 | HLA-A*02:38 | 515  | FELLHAPATV  | 0,6135 |

|     |             |      |             |        |
|-----|-------------|------|-------------|--------|
| A02 | HLA-A*02:38 | 610  | VLYQDVNCTEV | 0,5165 |
| A02 | HLA-A*02:38 | 691  | SIIAYTMSL   | 0,7292 |
| A02 | HLA-A*02:38 | 718  | FTISVTTEI   | 0,5114 |
| A02 | HLA-A*02:38 | 821  | LLFNKVTLA   | 0,7991 |
| A02 | HLA-A*02:38 | 915  | VLYENQKLI   | 0,6879 |
| A02 | HLA-A*02:38 | 937  | SLSSTASAL   | 0,5212 |
| A02 | HLA-A*02:38 | 958  | ALNTLVKQL   | 0,5209 |
| A02 | HLA-A*02:38 | 975  | SVLNDILSRL  | 0,5586 |
| A02 | HLA-A*02:38 | 976  | VLNDILSRL   | 0,9012 |
| A02 | HLA-A*02:38 | 983  | RLDKVEAEV   | 0,7049 |
| A02 | HLA-A*02:38 | 1000 | RLQSLQTYV   | 0,7606 |
| A02 | HLA-A*02:38 | 1047 | YHLMSFPQSA  | 0,5778 |
| A02 | HLA-A*02:38 | 1048 | HLMSFPQSA   | 0,7518 |
| A02 | HLA-A*02:38 | 1060 | VVFLHVITYV  | 0,6814 |
| A02 | HLA-A*02:38 | 1171 | GINASVVNI   | 0,5375 |
| A02 | HLA-A*02:38 | 1185 | RLNEVAKNL   | 0,6207 |
| A02 | HLA-A*02:38 | 1192 | NLNESLIDL   | 0,6694 |
| A02 | HLA-A*02:38 | 1220 | FIAGLIAIV   | 0,8041 |
| A02 | HLA-A*02:39 | 269  | YLQPRTFLL   | 0,9532 |
| A02 | HLA-A*02:39 | 417  | KIADYNYKL   | 0,7841 |
| A02 | HLA-A*02:39 | 691  | SIIAYTMSL   | 0,5907 |
| A02 | HLA-A*02:39 | 821  | LLFNKVTLA   | 0,5231 |
| A02 | HLA-A*02:39 | 857  | GLTVLPPLL   | 0,5068 |
| A02 | HLA-A*02:39 | 976  | VLNDILSRL   | 0,8817 |
| A02 | HLA-A*02:39 | 983  | RLDKVEAEV   | 0,6488 |
| A02 | HLA-A*02:39 | 1000 | RLQSLQTYV   | 0,5067 |
| A02 | HLA-A*02:39 | 1192 | NLNESLIDL   | 0,5275 |
| A02 | HLA-A*02:39 | 1220 | FIAGLIAIV   | 0,6464 |
| A02 | HLA-A*02:40 | 109  | TLDSKTQSL   | 0,6782 |
| A02 | HLA-A*02:40 | 133  | FQFCNDPFL   | 0,518  |
| A02 | HLA-A*02:40 | 269  | YLQPRTFLL   | 0,973  |
| A02 | HLA-A*02:40 | 386  | KLNDLCFTNV  | 0,7108 |
| A02 | HLA-A*02:40 | 417  | KIADYNYKL   | 0,909  |
| A02 | HLA-A*02:40 | 424  | KLPDDFTGCV  | 0,5916 |
| A02 | HLA-A*02:40 | 515  | FELLHAPATV  | 0,6033 |
| A02 | HLA-A*02:40 | 610  | VLYQDVNCTEV | 0,5092 |
| A02 | HLA-A*02:40 | 691  | SIIAYTMSL   | 0,7995 |
| A02 | HLA-A*02:40 | 718  | FTISVTTEI   | 0,5257 |
| A02 | HLA-A*02:40 | 821  | LLFNKVTLA   | 0,7857 |
| A02 | HLA-A*02:40 | 857  | GLTVLPPLL   | 0,6786 |
| A02 | HLA-A*02:40 | 915  | VLYENQKLI   | 0,5378 |
| A02 | HLA-A*02:40 | 975  | SVLNDILSRL  | 0,5124 |
| A02 | HLA-A*02:40 | 976  | VLNDILSRL   | 0,9507 |
| A02 | HLA-A*02:40 | 983  | RLDKVEAEV   | 0,8609 |
| A02 | HLA-A*02:40 | 1000 | RLQSLQTYV   | 0,7431 |
| A02 | HLA-A*02:40 | 1047 | YHLMSFPQSA  | 0,5452 |
| A02 | HLA-A*02:40 | 1048 | HLMSFPQSA   | 0,7385 |
| A02 | HLA-A*02:40 | 1060 | VVFLHVITYV  | 0,6948 |
| A02 | HLA-A*02:40 | 1185 | RLNEVAKNL   | 0,6189 |
| A02 | HLA-A*02:40 | 1192 | NLNESLIDL   | 0,6972 |

|     |             |      |            |        |
|-----|-------------|------|------------|--------|
| A02 | HLA-A*02:40 | 1220 | FIAGLIAIV  | 0,8207 |
| A02 | HLA-A*02:44 | 109  | TLDSKTQSL  | 0,722  |
| A02 | HLA-A*02:44 | 133  | FQFCNDPFL  | 0,6901 |
| A02 | HLA-A*02:44 | 269  | YLQPRTFLL  | 0,9483 |
| A02 | HLA-A*02:44 | 386  | KLNDLCFTNV | 0,6273 |
| A02 | HLA-A*02:44 | 417  | KIADYNYKL  | 0,9374 |
| A02 | HLA-A*02:44 | 424  | KLPDDFTGCV | 0,713  |
| A02 | HLA-A*02:44 | 612  | YQDVNCTEV  | 0,6481 |
| A02 | HLA-A*02:44 | 691  | SIIAYTMSL  | 0,873  |
| A02 | HLA-A*02:44 | 718  | FTISVTTEI  | 0,8345 |
| A02 | HLA-A*02:44 | 721  | SVTTEILPV  | 0,6283 |
| A02 | HLA-A*02:44 | 777  | NTQEVFAQV  | 0,5675 |
| A02 | HLA-A*02:44 | 786  | KQIYKTPPI  | 0,5169 |
| A02 | HLA-A*02:44 | 821  | LLFNKVTLA  | 0,6213 |
| A02 | HLA-A*02:44 | 869  | MIAQYTSAL  | 0,5812 |
| A02 | HLA-A*02:44 | 976  | VLNDILSRL  | 0,9188 |
| A02 | HLA-A*02:44 | 983  | RLDKVEAEV  | 0,7861 |
| A02 | HLA-A*02:44 | 1000 | RLQSLQTYV  | 0,7229 |
| A02 | HLA-A*02:44 | 1048 | HLMSFPQSA  | 0,6725 |
| A02 | HLA-A*02:44 | 1060 | VVFLHVTYV  | 0,7638 |
| A02 | HLA-A*02:44 | 1095 | FVSNNGTHWV | 0,5522 |
| A02 | HLA-A*02:44 | 1136 | TVYDPLQPEL | 0,5349 |
| A02 | HLA-A*02:44 | 1171 | GINASVUNI  | 0,5357 |
| A02 | HLA-A*02:44 | 1185 | RLNEVAKNL  | 0,5876 |
| A02 | HLA-A*02:44 | 1192 | NLNESLIDL  | 0,6815 |
| A02 | HLA-A*02:44 | 1196 | SLIDLQEL   | 0,5121 |
| A02 | HLA-A*02:44 | 1220 | FIAGLIAIV  | 0,868  |
| A02 | HLA-A*02:45 | 269  | YLQPRTFLL  | 0,87   |
| A02 | HLA-A*02:45 | 417  | KIADYNYKL  | 0,7495 |
| A02 | HLA-A*02:45 | 691  | SIIAYTMSL  | 0,5724 |
| A02 | HLA-A*02:45 | 976  | VLNDILSRL  | 0,7909 |
| A02 | HLA-A*02:45 | 983  | RLDKVEAEV  | 0,6527 |
| A02 | HLA-A*02:46 | 269  | YLQPRTFLL  | 0,897  |
| A02 | HLA-A*02:46 | 417  | KIADYNYKL  | 0,7857 |
| A02 | HLA-A*02:46 | 691  | SIIAYTMSL  | 0,5832 |
| A02 | HLA-A*02:46 | 976  | VLNDILSRL  | 0,8016 |
| A02 | HLA-A*02:46 | 983  | RLDKVEAEV  | 0,6558 |
| A02 | HLA-A*02:47 | 109  | TLDSKTQSL  | 0,8176 |
| A02 | HLA-A*02:47 | 133  | FQFCNDPFL  | 0,5963 |
| A02 | HLA-A*02:47 | 225  | PLVDLPIGI  | 0,5831 |
| A02 | HLA-A*02:47 | 269  | YLQPRTFLL  | 0,9772 |
| A02 | HLA-A*02:47 | 386  | KLNDLCFTNV | 0,8117 |
| A02 | HLA-A*02:47 | 416  | GKIADYNYKL | 0,6744 |
| A02 | HLA-A*02:47 | 417  | KIADYNYKL  | 0,9749 |
| A02 | HLA-A*02:47 | 424  | KLPDDFTGCV | 0,8227 |
| A02 | HLA-A*02:47 | 691  | SIIAYTMSL  | 0,8546 |
| A02 | HLA-A*02:47 | 718  | FTISVTTEI  | 0,7036 |
| A02 | HLA-A*02:47 | 821  | LLFNKVTLA  | 0,8262 |
| A02 | HLA-A*02:47 | 857  | GLTVLPPLL  | 0,7895 |
| A02 | HLA-A*02:47 | 869  | MIAQYTSAL  | 0,7897 |

|     |             |      |             |        |
|-----|-------------|------|-------------|--------|
| A02 | HLA-A*02:47 | 915  | VLYENQKLI   | 0,6812 |
| A02 | HLA-A*02:47 | 937  | SLSSTASAL   | 0,6691 |
| A02 | HLA-A*02:47 | 958  | ALNTLVKQL   | 0,8279 |
| A02 | HLA-A*02:47 | 975  | SVLNDILSRL  | 0,8782 |
| A02 | HLA-A*02:47 | 976  | VLNDILSRL   | 0,9886 |
| A02 | HLA-A*02:47 | 983  | RLDKVEAEV   | 0,849  |
| A02 | HLA-A*02:47 | 1000 | RLQSLQTYV   | 0,8402 |
| A02 | HLA-A*02:47 | 1047 | YHLMSFPQSA  | 0,6304 |
| A02 | HLA-A*02:47 | 1048 | HLMSFPQSA   | 0,8224 |
| A02 | HLA-A*02:47 | 1060 | VVFLHVTYV   | 0,7118 |
| A02 | HLA-A*02:47 | 1095 | FVSNGTHWV   | 0,6164 |
| A02 | HLA-A*02:47 | 1185 | RLNEVAKNL   | 0,9004 |
| A02 | HLA-A*02:47 | 1192 | NLNESLIDL   | 0,8471 |
| A02 | HLA-A*02:47 | 1196 | SLIDLQEL    | 0,7353 |
| A02 | HLA-A*02:47 | 1220 | FIAGLIAIV   | 0,8847 |
| A02 | HLA-A*02:48 | 109  | TLDSKTQSL   | 0,52   |
| A02 | HLA-A*02:48 | 269  | YLQPRTFLL   | 0,9298 |
| A02 | HLA-A*02:48 | 417  | KIADYNYKL   | 0,8626 |
| A02 | HLA-A*02:48 | 691  | SIIAYTMSL   | 0,69   |
| A02 | HLA-A*02:48 | 976  | VLNDILSRL   | 0,8779 |
| A02 | HLA-A*02:48 | 983  | RLDKVEAEV   | 0,7153 |
| A02 | HLA-A*02:48 | 1000 | RLQSLQTYV   | 0,6002 |
| A02 | HLA-A*02:48 | 1060 | VVFLHVTYV   | 0,5094 |
| A02 | HLA-A*02:48 | 1185 | RLNEVAKNL   | 0,5841 |
| A02 | HLA-A*02:49 | 109  | TLDSKTQSL   | 0,8693 |
| A02 | HLA-A*02:49 | 269  | YLQPRTFLL   | 0,9729 |
| A02 | HLA-A*02:49 | 386  | KLNDLCFTNV  | 0,6741 |
| A02 | HLA-A*02:49 | 417  | KIADYNYKL   | 0,8873 |
| A02 | HLA-A*02:49 | 424  | KLPDDFTGCV  | 0,6103 |
| A02 | HLA-A*02:49 | 515  | FELLHAPATV  | 0,5508 |
| A02 | HLA-A*02:49 | 612  | YQDVNCTEV   | 0,5076 |
| A02 | HLA-A*02:49 | 691  | SIIAYTMSL   | 0,6942 |
| A02 | HLA-A*02:49 | 821  | LLFNKVTLA   | 0,6712 |
| A02 | HLA-A*02:49 | 857  | GLTVLPPLL   | 0,5991 |
| A02 | HLA-A*02:49 | 975  | SVLNDILSRL  | 0,5907 |
| A02 | HLA-A*02:49 | 976  | VLNDILSRL   | 0,9452 |
| A02 | HLA-A*02:49 | 982  | SRLDKVEAEV  | 0,5478 |
| A02 | HLA-A*02:49 | 983  | RLDKVEAEV   | 0,9308 |
| A02 | HLA-A*02:49 | 1000 | RLQSLQTYV   | 0,8043 |
| A02 | HLA-A*02:49 | 1048 | HLMSFPQSA   | 0,6591 |
| A02 | HLA-A*02:49 | 1060 | VVFLHVTYV   | 0,571  |
| A02 | HLA-A*02:49 | 1185 | RLNEVAKNL   | 0,6724 |
| A02 | HLA-A*02:49 | 1192 | NLNESLIDL   | 0,7823 |
| A02 | HLA-A*02:49 | 1220 | FIAGLIAIV   | 0,7966 |
| A02 | HLA-A*02:51 | 133  | FQFCNDPFL   | 0,7104 |
| A02 | HLA-A*02:51 | 133  | FQFCNDPFLGV | 0,5205 |
| A02 | HLA-A*02:51 | 269  | YLQPRTFLL   | 0,8955 |
| A02 | HLA-A*02:51 | 417  | KIADYNYKL   | 0,9064 |
| A02 | HLA-A*02:51 | 424  | KLPDDFTGCV  | 0,5686 |
| A02 | HLA-A*02:51 | 612  | YQDVNCTEV   | 0,5256 |



|     |             |      |            |        |
|-----|-------------|------|------------|--------|
| A02 | HLA-A*02:51 | 691  | SIIAYTMSL  | 0,847  |
| A02 | HLA-A*02:51 | 712  | IAIPTNFTI  | 0,5224 |
| A02 | HLA-A*02:51 | 718  | FTISVTTEI  | 0,8184 |
| A02 | HLA-A*02:51 | 721  | SVTTEILPV  | 0,5642 |
| A02 | HLA-A*02:51 | 821  | LLFNKVTLA  | 0,5419 |
| A02 | HLA-A*02:51 | 894  | LQIPFAMQM  | 0,6147 |
| A02 | HLA-A*02:51 | 976  | VLNDILSRL  | 0,8346 |
| A02 | HLA-A*02:51 | 983  | RLDKVEAEV  | 0,6135 |
| A02 | HLA-A*02:51 | 1048 | HLMSFPQSA  | 0,5289 |
| A02 | HLA-A*02:51 | 1060 | VVFLHVTYV  | 0,7813 |
| A02 | HLA-A*02:51 | 1136 | TVYDPLQPEL | 0,5968 |
| A02 | HLA-A*02:51 | 1220 | FIAGLIAIV  | 0,81   |
| A02 | HLA-A*02:54 | 109  | TLDSKTQSL  | 0,6942 |
| A02 | HLA-A*02:54 | 269  | YLQPRTFLL  | 0,9082 |
| A02 | HLA-A*02:54 | 417  | KIADYNYKL  | 0,8163 |
| A02 | HLA-A*02:54 | 424  | KLPDDFTGCV | 0,5607 |
| A02 | HLA-A*02:54 | 516  | ELLHAPATV  | 0,5493 |
| A02 | HLA-A*02:54 | 612  | YQDVNCTEV  | 0,5542 |
| A02 | HLA-A*02:54 | 691  | SIIAYTMSL  | 0,7472 |
| A02 | HLA-A*02:54 | 718  | FTISVTTEI  | 0,731  |
| A02 | HLA-A*02:54 | 721  | SVTTEILPV  | 0,5157 |
| A02 | HLA-A*02:54 | 777  | NTQEVFAQV  | 0,6031 |
| A02 | HLA-A*02:54 | 976  | VLNDILSRL  | 0,8799 |
| A02 | HLA-A*02:54 | 983  | RLDKVEAEV  | 0,6743 |
| A02 | HLA-A*02:54 | 1000 | RLQSLQTYV  | 0,5446 |
| A02 | HLA-A*02:54 | 1048 | HLMSFPQSA  | 0,532  |
| A02 | HLA-A*02:54 | 1060 | VVFLHVTYV  | 0,6044 |
| A02 | HLA-A*02:54 | 1192 | NLNESLIDL  | 0,6437 |
| A02 | HLA-A*02:54 | 1220 | FIAGLIAIV  | 0,7718 |
| A02 | HLA-A*02:56 | 269  | YLQPRTFLL  | 0,6126 |
| A02 | HLA-A*02:56 | 417  | KIADYNYKL  | 0,6147 |
| A02 | HLA-A*02:56 | 691  | SIIAYTMSL  | 0,5351 |
| A02 | HLA-A*02:56 | 1060 | VVFLHVTYV  | 0,5227 |
| A02 | HLA-A*02:57 | 269  | YLQPRTFLL  | 0,7289 |
| A02 | HLA-A*02:57 | 417  | KIADYNYKL  | 0,7431 |
| A02 | HLA-A*02:57 | 691  | SIIAYTMSL  | 0,6331 |
| A02 | HLA-A*02:57 | 976  | VLNDILSRL  | 0,5643 |
| A02 | HLA-A*02:57 | 1060 | VVFLHVTYV  | 0,5368 |
| A02 | HLA-A*02:58 | 109  | TLDSKTQSL  | 0,6907 |
| A02 | HLA-A*02:58 | 269  | YLQPRTFLL  | 0,9723 |
| A02 | HLA-A*02:58 | 386  | KLNDLCFTNV | 0,6236 |
| A02 | HLA-A*02:58 | 417  | KIADYNYKL  | 0,9119 |
| A02 | HLA-A*02:58 | 424  | KLPDDFTGCV | 0,5701 |
| A02 | HLA-A*02:58 | 691  | SIIAYTMSL  | 0,7337 |
| A02 | HLA-A*02:58 | 821  | LLFNKVTLA  | 0,6551 |
| A02 | HLA-A*02:58 | 857  | GLTVLPPLL  | 0,6884 |
| A02 | HLA-A*02:58 | 975  | SVLNDILSRL | 0,5159 |
| A02 | HLA-A*02:58 | 976  | VLNDILSRL  | 0,95   |
| A02 | HLA-A*02:58 | 983  | RLDKVEAEV  | 0,8408 |
| A02 | HLA-A*02:58 | 1000 | RLQSLQTYV  | 0,656  |

|     |             |      |             |        |
|-----|-------------|------|-------------|--------|
| A02 | HLA-A*02:58 | 1048 | HLMSFPQSA   | 0,623  |
| A02 | HLA-A*02:58 | 1060 | VVFLHVTYV   | 0,5564 |
| A02 | HLA-A*02:58 | 1185 | RLNEVAKNL   | 0,6577 |
| A02 | HLA-A*02:58 | 1192 | NLNESLIDL   | 0,6601 |
| A02 | HLA-A*02:58 | 1220 | FIAGLIAIV   | 0,707  |
| A02 | HLA-A*02:59 | 109  | TLDSKTQSL   | 0,6782 |
| A02 | HLA-A*02:59 | 133  | FQFCNDPFL   | 0,518  |
| A02 | HLA-A*02:59 | 269  | YLQPRTFLL   | 0,973  |
| A02 | HLA-A*02:59 | 386  | KLNDLCFTNV  | 0,7108 |
| A02 | HLA-A*02:59 | 417  | KIADYNYKL   | 0,909  |
| A02 | HLA-A*02:59 | 424  | KLPDDFTGCV  | 0,5916 |
| A02 | HLA-A*02:59 | 515  | FELLHAPATV  | 0,6033 |
| A02 | HLA-A*02:59 | 610  | VLYQDVNCTEV | 0,5092 |
| A02 | HLA-A*02:59 | 691  | SIIAYTMSL   | 0,7995 |
| A02 | HLA-A*02:59 | 718  | FTISVTTEI   | 0,5257 |
| A02 | HLA-A*02:59 | 821  | LLFNKVTLA   | 0,7857 |
| A02 | HLA-A*02:59 | 857  | GLTVLPPLL   | 0,6786 |
| A02 | HLA-A*02:59 | 915  | VLYENQKLI   | 0,5378 |
| A02 | HLA-A*02:59 | 975  | SVLNDILSRL  | 0,5124 |
| A02 | HLA-A*02:59 | 976  | VLNDILSRL   | 0,9507 |
| A02 | HLA-A*02:59 | 983  | RLDKVEAEV   | 0,8609 |
| A02 | HLA-A*02:59 | 1000 | RLQSLQTYV   | 0,7431 |
| A02 | HLA-A*02:59 | 1047 | YHLMSFPQSA  | 0,5452 |
| A02 | HLA-A*02:59 | 1048 | HLMSFPQSA   | 0,7385 |
| A02 | HLA-A*02:59 | 1060 | VVFLHVTYV   | 0,6948 |
| A02 | HLA-A*02:59 | 1185 | RLNEVAKNL   | 0,6189 |
| A02 | HLA-A*02:59 | 1192 | NLNESLIDL   | 0,6972 |
| A02 | HLA-A*02:59 | 1220 | FIAGLIAIV   | 0,8207 |
| A02 | HLA-A*02:61 | 133  | FQFCNDPFL   | 0,7104 |
| A02 | HLA-A*02:61 | 133  | FQFCNDPFLGV | 0,5205 |
| A02 | HLA-A*02:61 | 269  | YLQPRTFLL   | 0,8955 |
| A02 | HLA-A*02:61 | 417  | KIADYNYKL   | 0,9064 |
| A02 | HLA-A*02:61 | 424  | KLPDDFTGCV  | 0,5686 |
| A02 | HLA-A*02:61 | 612  | YQDVNCTEV   | 0,5256 |
| A02 | HLA-A*02:61 | 691  | SIIAYTMSL   | 0,847  |
| A02 | HLA-A*02:61 | 712  | IAIPTNFTI   | 0,5224 |
| A02 | HLA-A*02:61 | 718  | FTISVTTEI   | 0,8184 |
| A02 | HLA-A*02:61 | 721  | SVTTEILPV   | 0,5642 |
| A02 | HLA-A*02:61 | 821  | LLFNKVTLA   | 0,5419 |
| A02 | HLA-A*02:61 | 894  | LQIPFAMQM   | 0,6147 |
| A02 | HLA-A*02:61 | 976  | VLNDILSRL   | 0,8346 |
| A02 | HLA-A*02:61 | 983  | RLDKVEAEV   | 0,6135 |
| A02 | HLA-A*02:61 | 1048 | HLMSFPQSA   | 0,5289 |
| A02 | HLA-A*02:61 | 1060 | VVFLHVTYV   | 0,7813 |
| A02 | HLA-A*02:61 | 1136 | TVYDPLQPEL  | 0,5968 |
| A02 | HLA-A*02:61 | 1220 | FIAGLIAIV   | 0,81   |
| A02 | HLA-A*02:62 | 269  | YLQPRTFLL   | 0,778  |
| A02 | HLA-A*02:62 | 417  | KIADYNYKL   | 0,6875 |
| A02 | HLA-A*02:62 | 691  | SIIAYTMSL   | 0,6033 |
| A02 | HLA-A*02:62 | 821  | LLFNKVTLA   | 0,5193 |

|     |             |      |             |        |
|-----|-------------|------|-------------|--------|
| A02 | HLA-A*02:62 | 976  | VLNDILSRL   | 0,681  |
| A02 | HLA-A*02:62 | 983  | RLDKVEAEV   | 0,636  |
| A02 | HLA-A*02:62 | 1000 | RLQSLQTYV   | 0,5378 |
| A02 | HLA-A*02:62 | 1060 | VVFLHVTYV   | 0,6207 |
| A02 | HLA-A*02:62 | 1220 | FIAGLIAIV   | 0,5269 |
| A02 | HLA-A*02:63 | 109  | TLDSKTQSL   | 0,825  |
| A02 | HLA-A*02:63 | 133  | FQFCNDPFL   | 0,5968 |
| A02 | HLA-A*02:63 | 269  | YLQPRTFLL   | 0,9773 |
| A02 | HLA-A*02:63 | 386  | KLNDLCFTNV  | 0,8261 |
| A02 | HLA-A*02:63 | 416  | GKIADYNYKL  | 0,6474 |
| A02 | HLA-A*02:63 | 417  | KIADYNYKL   | 0,9705 |
| A02 | HLA-A*02:63 | 424  | KLPDDFTGCV  | 0,8161 |
| A02 | HLA-A*02:63 | 512  | VLSFELLHA   | 0,5802 |
| A02 | HLA-A*02:63 | 515  | FELLHAPATV  | 0,5863 |
| A02 | HLA-A*02:63 | 691  | SIIAYTMSL   | 0,8402 |
| A02 | HLA-A*02:63 | 718  | FTISVTTEI   | 0,6992 |
| A02 | HLA-A*02:63 | 821  | LLFNKVTLA   | 0,8324 |
| A02 | HLA-A*02:63 | 857  | GLTVLPPLL   | 0,7823 |
| A02 | HLA-A*02:63 | 869  | MIAQYTSAL   | 0,7746 |
| A02 | HLA-A*02:63 | 915  | VLYENQKLI   | 0,6825 |
| A02 | HLA-A*02:63 | 937  | SLSSTASAL   | 0,6944 |
| A02 | HLA-A*02:63 | 947  | KLQDVVNQNA  | 0,5801 |
| A02 | HLA-A*02:63 | 958  | ALNTLVKQL   | 0,8332 |
| A02 | HLA-A*02:63 | 975  | SVLNDILSRL  | 0,878  |
| A02 | HLA-A*02:63 | 976  | VLNDILSRL   | 0,989  |
| A02 | HLA-A*02:63 | 983  | RLDKVEAEV   | 0,8636 |
| A02 | HLA-A*02:63 | 1000 | RLQSLQTYV   | 0,8614 |
| A02 | HLA-A*02:63 | 1047 | YHLMSPQSA   | 0,6493 |
| A02 | HLA-A*02:63 | 1048 | HLMSFPQSA   | 0,8395 |
| A02 | HLA-A*02:63 | 1060 | VVFLHVTYV   | 0,6976 |
| A02 | HLA-A*02:63 | 1095 | FVSNNGTHWFV | 0,621  |
| A02 | HLA-A*02:63 | 1185 | RLNEVAKNL   | 0,9052 |
| A02 | HLA-A*02:63 | 1192 | NLNESLIDL   | 0,8555 |
| A02 | HLA-A*02:63 | 1196 | SLIDLQEL    | 0,7114 |
| A02 | HLA-A*02:63 | 1220 | FIAGLIAIV   | 0,8951 |
| A02 | HLA-A*02:66 | 109  | TLDSKTQSL   | 0,6782 |
| A02 | HLA-A*02:66 | 133  | FQFCNDPFL   | 0,518  |
| A02 | HLA-A*02:66 | 269  | YLQPRTFLL   | 0,973  |
| A02 | HLA-A*02:66 | 386  | KLNDLCFTNV  | 0,7108 |
| A02 | HLA-A*02:66 | 417  | KIADYNYKL   | 0,909  |
| A02 | HLA-A*02:66 | 424  | KLPDDFTGCV  | 0,5916 |
| A02 | HLA-A*02:66 | 515  | FELLHAPATV  | 0,6033 |
| A02 | HLA-A*02:66 | 610  | VLYQDVNCTEV | 0,5092 |
| A02 | HLA-A*02:66 | 691  | SIIAYTMSL   | 0,7995 |
| A02 | HLA-A*02:66 | 718  | FTISVTTEI   | 0,5257 |
| A02 | HLA-A*02:66 | 821  | LLFNKVTLA   | 0,7857 |
| A02 | HLA-A*02:66 | 857  | GLTVLPPLL   | 0,6786 |
| A02 | HLA-A*02:66 | 915  | VLYENQKLI   | 0,5378 |
| A02 | HLA-A*02:66 | 975  | SVLNDILSRL  | 0,5124 |
| A02 | HLA-A*02:66 | 976  | VLNDILSRL   | 0,9507 |

|     |             |      |             |        |
|-----|-------------|------|-------------|--------|
| A02 | HLA-A*02:66 | 983  | RLDKVEAEV   | 0,8609 |
| A02 | HLA-A*02:66 | 1000 | RLQSLQTYV   | 0,7431 |
| A02 | HLA-A*02:66 | 1047 | YHLMSFPQSA  | 0,5452 |
| A02 | HLA-A*02:66 | 1048 | HLMSFPQSA   | 0,7385 |
| A02 | HLA-A*02:66 | 1060 | VVFLHVTYV   | 0,6948 |
| A02 | HLA-A*02:66 | 1185 | RLNEVAKNL   | 0,6189 |
| A02 | HLA-A*02:66 | 1192 | NLNESLIDL   | 0,6972 |
| A02 | HLA-A*02:66 | 1220 | FIAGLIAIV   | 0,8207 |
| A02 | HLA-A*02:67 | 109  | TLDSKTQSL   | 0,6782 |
| A02 | HLA-A*02:67 | 133  | FQFCNDPFL   | 0,518  |
| A02 | HLA-A*02:67 | 269  | YLQPRTFLL   | 0,973  |
| A02 | HLA-A*02:67 | 386  | KLNDLCFTNV  | 0,7108 |
| A02 | HLA-A*02:67 | 417  | KIADYNYKL   | 0,909  |
| A02 | HLA-A*02:67 | 424  | KLPDDFTGCV  | 0,5916 |
| A02 | HLA-A*02:67 | 515  | FELLHAPATV  | 0,6033 |
| A02 | HLA-A*02:67 | 610  | VLYQDVNCTEV | 0,5092 |
| A02 | HLA-A*02:67 | 691  | SIIAYTMSL   | 0,7995 |
| A02 | HLA-A*02:67 | 718  | FTISVTTEI   | 0,5257 |
| A02 | HLA-A*02:67 | 821  | LLFNKVTLA   | 0,7857 |
| A02 | HLA-A*02:67 | 857  | GLTVLPPLL   | 0,6786 |
| A02 | HLA-A*02:67 | 915  | VLYENQKLI   | 0,5378 |
| A02 | HLA-A*02:67 | 975  | SVLNDILSRL  | 0,5124 |
| A02 | HLA-A*02:67 | 976  | VLNDILSRL   | 0,9507 |
| A02 | HLA-A*02:67 | 983  | RLDKVEAEV   | 0,8609 |
| A02 | HLA-A*02:67 | 1000 | RLQSLQTYV   | 0,7431 |
| A02 | HLA-A*02:67 | 1047 | YHLMSFPQSA  | 0,5452 |
| A02 | HLA-A*02:67 | 1048 | HLMSFPQSA   | 0,7385 |
| A02 | HLA-A*02:67 | 1060 | VVFLHVTYV   | 0,6948 |
| A02 | HLA-A*02:67 | 1185 | RLNEVAKNL   | 0,6189 |
| A02 | HLA-A*02:67 | 1192 | NLNESLIDL   | 0,6972 |
| A02 | HLA-A*02:67 | 1220 | FIAGLIAIV   | 0,8207 |
| A02 | HLA-A*02:68 | 109  | TLDSKTQSL   | 0,6782 |
| A02 | HLA-A*02:68 | 133  | FQFCNDPFL   | 0,518  |
| A02 | HLA-A*02:68 | 269  | YLQPRTFLL   | 0,973  |
| A02 | HLA-A*02:68 | 386  | KLNDLCFTNV  | 0,7108 |
| A02 | HLA-A*02:68 | 417  | KIADYNYKL   | 0,909  |
| A02 | HLA-A*02:68 | 424  | KLPDDFTGCV  | 0,5916 |
| A02 | HLA-A*02:68 | 515  | FELLHAPATV  | 0,6033 |
| A02 | HLA-A*02:68 | 610  | VLYQDVNCTEV | 0,5092 |
| A02 | HLA-A*02:68 | 691  | SIIAYTMSL   | 0,7995 |
| A02 | HLA-A*02:68 | 718  | FTISVTTEI   | 0,5257 |
| A02 | HLA-A*02:68 | 821  | LLFNKVTLA   | 0,7857 |
| A02 | HLA-A*02:68 | 857  | GLTVLPPLL   | 0,6786 |
| A02 | HLA-A*02:68 | 915  | VLYENQKLI   | 0,5378 |
| A02 | HLA-A*02:68 | 975  | SVLNDILSRL  | 0,5124 |
| A02 | HLA-A*02:68 | 976  | VLNDILSRL   | 0,9507 |
| A02 | HLA-A*02:68 | 983  | RLDKVEAEV   | 0,8609 |
| A02 | HLA-A*02:68 | 1000 | RLQSLQTYV   | 0,7431 |
| A02 | HLA-A*02:68 | 1047 | YHLMSFPQSA  | 0,5452 |
| A02 | HLA-A*02:68 | 1048 | HLMSFPQSA   | 0,7385 |

|     |             |      |             |        |
|-----|-------------|------|-------------|--------|
| A02 | HLA-A*02:68 | 1060 | VVFLHVTYV   | 0,6948 |
| A02 | HLA-A*02:68 | 1185 | RLNEVAKNL   | 0,6189 |
| A02 | HLA-A*02:68 | 1192 | NLNESLIDL   | 0,6972 |
| A02 | HLA-A*02:68 | 1220 | FIAGLIAIV   | 0,8207 |
| A02 | HLA-A*02:69 | 109  | TLDSKTQSL   | 0,8988 |
| A02 | HLA-A*02:69 | 269  | YLQPRTFLL   | 0,9932 |
| A02 | HLA-A*02:69 | 386  | KLNDLCFTNV  | 0,8871 |
| A02 | HLA-A*02:69 | 417  | KIADYNYKL   | 0,97   |
| A02 | HLA-A*02:69 | 424  | KLPDDFTGCV  | 0,7417 |
| A02 | HLA-A*02:69 | 515  | FELLHAPATV  | 0,7889 |
| A02 | HLA-A*02:69 | 610  | VLYQDVNCTEV | 0,6974 |
| A02 | HLA-A*02:69 | 691  | SIIAYTMSL   | 0,9432 |
| A02 | HLA-A*02:69 | 718  | FTISVTTEI   | 0,8216 |
| A02 | HLA-A*02:69 | 821  | LLFNKVTLA   | 0,9443 |
| A02 | HLA-A*02:69 | 857  | GLTVLPPLL   | 0,7856 |
| A02 | HLA-A*02:69 | 915  | VLYENQKLI   | 0,8632 |
| A02 | HLA-A*02:69 | 958  | ALNTLVKQL   | 0,8141 |
| A02 | HLA-A*02:69 | 975  | SVLNDILSRL  | 0,7945 |
| A02 | HLA-A*02:69 | 976  | VLNDILSRL   | 0,9917 |
| A02 | HLA-A*02:69 | 983  | RLDKVEAEV   | 0,9677 |
| A02 | HLA-A*02:69 | 1000 | RLQSLQTYV   | 0,9419 |
| A02 | HLA-A*02:69 | 1047 | YHLMSFPQSA  | 0,7518 |
| A02 | HLA-A*02:69 | 1048 | HLMSFPQSA   | 0,9136 |
| A02 | HLA-A*02:69 | 1060 | VVFLHVTYV   | 0,8865 |
| A02 | HLA-A*02:69 | 1171 | GINASVVNI   | 0,7552 |
| A02 | HLA-A*02:69 | 1185 | RLNEVAKNL   | 0,9099 |
| A02 | HLA-A*02:69 | 1192 | NLNESLIDL   | 0,8952 |
| A02 | HLA-A*02:69 | 1220 | FIAGLIAIV   | 0,9533 |
| A02 | HLA-A*02:70 | 109  | TLDSKTQSL   | 0,6782 |
| A02 | HLA-A*02:70 | 133  | FQFCNDPFL   | 0,518  |
| A02 | HLA-A*02:70 | 269  | YLQPRTFLL   | 0,973  |
| A02 | HLA-A*02:70 | 386  | KLNDLCFTNV  | 0,7108 |
| A02 | HLA-A*02:70 | 417  | KIADYNYKL   | 0,909  |
| A02 | HLA-A*02:70 | 424  | KLPDDFTGCV  | 0,5916 |
| A02 | HLA-A*02:70 | 515  | FELLHAPATV  | 0,6033 |
| A02 | HLA-A*02:70 | 610  | VLYQDVNCTEV | 0,5092 |
| A02 | HLA-A*02:70 | 691  | SIIAYTMSL   | 0,7995 |
| A02 | HLA-A*02:70 | 718  | FTISVTTEI   | 0,5257 |
| A02 | HLA-A*02:70 | 821  | LLFNKVTLA   | 0,7857 |
| A02 | HLA-A*02:70 | 857  | GLTVLPPLL   | 0,6786 |
| A02 | HLA-A*02:70 | 915  | VLYENQKLI   | 0,5378 |
| A02 | HLA-A*02:70 | 975  | SVLNDILSRL  | 0,5124 |
| A02 | HLA-A*02:70 | 976  | VLNDILSRL   | 0,9507 |
| A02 | HLA-A*02:70 | 983  | RLDKVEAEV   | 0,8609 |
| A02 | HLA-A*02:70 | 1000 | RLQSLQTYV   | 0,7431 |
| A02 | HLA-A*02:70 | 1047 | YHLMSFPQSA  | 0,5452 |
| A02 | HLA-A*02:70 | 1048 | HLMSFPQSA   | 0,7385 |
| A02 | HLA-A*02:70 | 1060 | VVFLHVTYV   | 0,6948 |
| A02 | HLA-A*02:70 | 1185 | RLNEVAKNL   | 0,6189 |
| A02 | HLA-A*02:70 | 1192 | NLNESLIDL   | 0,6972 |

|     |             |      |             |        |
|-----|-------------|------|-------------|--------|
| A02 | HLA-A*02:70 | 1220 | FIAGLIAIV   | 0,8207 |
| A02 | HLA-A*02:71 | 109  | TLDSKTQSL   | 0,6782 |
| A02 | HLA-A*02:71 | 133  | FQFCNDPFL   | 0,518  |
| A02 | HLA-A*02:71 | 269  | YLQPRTFLL   | 0,973  |
| A02 | HLA-A*02:71 | 386  | KLNDLCFTNV  | 0,7108 |
| A02 | HLA-A*02:71 | 417  | KIADYNYKL   | 0,909  |
| A02 | HLA-A*02:71 | 424  | KLPDDFTGCV  | 0,5916 |
| A02 | HLA-A*02:71 | 515  | FELLHAPATV  | 0,6033 |
| A02 | HLA-A*02:71 | 610  | VLYQDVNCTEV | 0,5092 |
| A02 | HLA-A*02:71 | 691  | SIIAYTMSL   | 0,7995 |
| A02 | HLA-A*02:71 | 718  | FTISVTTEI   | 0,5257 |
| A02 | HLA-A*02:71 | 821  | LLFNKVTLA   | 0,7857 |
| A02 | HLA-A*02:71 | 857  | GLTVLPPLL   | 0,6786 |
| A02 | HLA-A*02:71 | 915  | VLYENQKLI   | 0,5378 |
| A02 | HLA-A*02:71 | 975  | SVLNDILSRL  | 0,5124 |
| A02 | HLA-A*02:71 | 976  | VLNDILSRL   | 0,9507 |
| A02 | HLA-A*02:71 | 983  | RLDKVEAEV   | 0,8609 |
| A02 | HLA-A*02:71 | 1000 | RLQSLQTYV   | 0,7431 |
| A02 | HLA-A*02:71 | 1047 | YHLMSFPQSA  | 0,5452 |
| A02 | HLA-A*02:71 | 1048 | HLMSFPQSA   | 0,7385 |
| A02 | HLA-A*02:71 | 1060 | VVFLHVTYV   | 0,6948 |
| A02 | HLA-A*02:71 | 1185 | RLNEVAKNL   | 0,6189 |
| A02 | HLA-A*02:71 | 1192 | NLNESLIDL   | 0,6972 |
| A02 | HLA-A*02:71 | 1220 | FIAGLIAIV   | 0,8207 |
| A02 | HLA-A*02:72 | 133  | FQFCNDPFL   | 0,7104 |
| A02 | HLA-A*02:72 | 133  | FQFCNDPFLGV | 0,5205 |
| A02 | HLA-A*02:72 | 269  | YLQPRTFLL   | 0,8955 |
| A02 | HLA-A*02:72 | 417  | KIADYNYKL   | 0,9064 |
| A02 | HLA-A*02:72 | 424  | KLPDDFTGCV  | 0,5686 |
| A02 | HLA-A*02:72 | 612  | YQDVNCTEV   | 0,5256 |
| A02 | HLA-A*02:72 | 691  | SIIAYTMSL   | 0,847  |
| A02 | HLA-A*02:72 | 712  | IAIPTNFTI   | 0,5224 |
| A02 | HLA-A*02:72 | 718  | FTISVTTEI   | 0,8184 |
| A02 | HLA-A*02:72 | 721  | SVTTEILPV   | 0,5642 |
| A02 | HLA-A*02:72 | 821  | LLFNKVTLA   | 0,5419 |
| A02 | HLA-A*02:72 | 894  | LQIPFAMQM   | 0,6147 |
| A02 | HLA-A*02:72 | 976  | VLNDILSRL   | 0,8346 |
| A02 | HLA-A*02:72 | 983  | RLDKVEAEV   | 0,6135 |
| A02 | HLA-A*02:72 | 1048 | HLMSFPQSA   | 0,5289 |
| A02 | HLA-A*02:72 | 1060 | VVFLHVTYV   | 0,7813 |
| A02 | HLA-A*02:72 | 1136 | TVYDPLQPEL  | 0,5968 |
| A02 | HLA-A*02:72 | 1220 | FIAGLIAIV   | 0,81   |
| A02 | HLA-A*02:74 | 109  | TLDSKTQSL   | 0,6782 |
| A02 | HLA-A*02:74 | 133  | FQFCNDPFL   | 0,518  |
| A02 | HLA-A*02:74 | 269  | YLQPRTFLL   | 0,973  |
| A02 | HLA-A*02:74 | 386  | KLNDLCFTNV  | 0,7108 |
| A02 | HLA-A*02:74 | 417  | KIADYNYKL   | 0,909  |
| A02 | HLA-A*02:74 | 424  | KLPDDFTGCV  | 0,5916 |
| A02 | HLA-A*02:74 | 515  | FELLHAPATV  | 0,6033 |
| A02 | HLA-A*02:74 | 610  | VLYQDVNCTEV | 0,5092 |

|     |             |      |             |        |
|-----|-------------|------|-------------|--------|
| A02 | HLA-A*02:74 | 691  | SIIAYTMSL   | 0,7995 |
| A02 | HLA-A*02:74 | 718  | FTISVTTEI   | 0,5257 |
| A02 | HLA-A*02:74 | 821  | LLFNKVTLA   | 0,7857 |
| A02 | HLA-A*02:74 | 857  | GLTVLPPLL   | 0,6786 |
| A02 | HLA-A*02:74 | 915  | VLYENQKLI   | 0,5378 |
| A02 | HLA-A*02:74 | 975  | SVLNDILSRL  | 0,5124 |
| A02 | HLA-A*02:74 | 976  | VLNDILSRL   | 0,9507 |
| A02 | HLA-A*02:74 | 983  | RLDKVEAEV   | 0,8609 |
| A02 | HLA-A*02:74 | 1000 | RLQSLQTYV   | 0,7431 |
| A02 | HLA-A*02:74 | 1047 | YHLMSFPQSA  | 0,5452 |
| A02 | HLA-A*02:74 | 1048 | HLMSFPQSA   | 0,7385 |
| A02 | HLA-A*02:74 | 1060 | VVFLHVITYV  | 0,6948 |
| A02 | HLA-A*02:74 | 1185 | RLNEVAKNL   | 0,6189 |
| A02 | HLA-A*02:74 | 1192 | NLNESLIDL   | 0,6972 |
| A02 | HLA-A*02:74 | 1220 | FIAGLIAIV   | 0,8207 |
| A02 | HLA-A*02:75 | 109  | TLDSKTQSL   | 0,6782 |
| A02 | HLA-A*02:75 | 133  | FQFCNDPFL   | 0,518  |
| A02 | HLA-A*02:75 | 269  | YLQPRTFLL   | 0,973  |
| A02 | HLA-A*02:75 | 386  | KLNDLCFTNV  | 0,7108 |
| A02 | HLA-A*02:75 | 417  | KIADYNYKL   | 0,909  |
| A02 | HLA-A*02:75 | 424  | KLPDDFTGCV  | 0,5916 |
| A02 | HLA-A*02:75 | 515  | FELLHAPATV  | 0,6033 |
| A02 | HLA-A*02:75 | 610  | VLYQDVNCTEV | 0,5092 |
| A02 | HLA-A*02:75 | 691  | SIIAYTMSL   | 0,7995 |
| A02 | HLA-A*02:75 | 718  | FTISVTTEI   | 0,5257 |
| A02 | HLA-A*02:75 | 821  | LLFNKVTLA   | 0,7857 |
| A02 | HLA-A*02:75 | 857  | GLTVLPPLL   | 0,6786 |
| A02 | HLA-A*02:75 | 915  | VLYENQKLI   | 0,5378 |
| A02 | HLA-A*02:75 | 975  | SVLNDILSRL  | 0,5124 |
| A02 | HLA-A*02:75 | 976  | VLNDILSRL   | 0,9507 |
| A02 | HLA-A*02:75 | 983  | RLDKVEAEV   | 0,8609 |
| A02 | HLA-A*02:75 | 1000 | RLQSLQTYV   | 0,7431 |
| A02 | HLA-A*02:75 | 1047 | YHLMSFPQSA  | 0,5452 |
| A02 | HLA-A*02:75 | 1048 | HLMSFPQSA   | 0,7385 |
| A02 | HLA-A*02:75 | 1060 | VVFLHVITYV  | 0,6948 |
| A02 | HLA-A*02:75 | 1185 | RLNEVAKNL   | 0,6189 |
| A02 | HLA-A*02:75 | 1192 | NLNESLIDL   | 0,6972 |
| A02 | HLA-A*02:75 | 1220 | FIAGLIAIV   | 0,8207 |
| A02 | HLA-A*02:77 | 109  | TLDSKTQSL   | 0,6782 |
| A02 | HLA-A*02:77 | 133  | FQFCNDPFL   | 0,518  |
| A02 | HLA-A*02:77 | 269  | YLQPRTFLL   | 0,973  |
| A02 | HLA-A*02:77 | 386  | KLNDLCFTNV  | 0,7108 |
| A02 | HLA-A*02:77 | 417  | KIADYNYKL   | 0,909  |
| A02 | HLA-A*02:77 | 424  | KLPDDFTGCV  | 0,5916 |
| A02 | HLA-A*02:77 | 515  | FELLHAPATV  | 0,6033 |
| A02 | HLA-A*02:77 | 610  | VLYQDVNCTEV | 0,5092 |
| A02 | HLA-A*02:77 | 691  | SIIAYTMSL   | 0,7995 |
| A02 | HLA-A*02:77 | 718  | FTISVTTEI   | 0,5257 |
| A02 | HLA-A*02:77 | 821  | LLFNKVTLA   | 0,7857 |
| A02 | HLA-A*02:77 | 857  | GLTVLPPLL   | 0,6786 |

|     |             |      |             |        |
|-----|-------------|------|-------------|--------|
| A02 | HLA-A*02:77 | 915  | VLYENQKLI   | 0,5378 |
| A02 | HLA-A*02:77 | 975  | SVLNDILSRL  | 0,5124 |
| A02 | HLA-A*02:77 | 976  | VLNDILSRL   | 0,9507 |
| A02 | HLA-A*02:77 | 983  | RLDKVEAEV   | 0,8609 |
| A02 | HLA-A*02:77 | 1000 | RLQSLQTYV   | 0,7431 |
| A02 | HLA-A*02:77 | 1047 | YHLMSFPQSA  | 0,5452 |
| A02 | HLA-A*02:77 | 1048 | HLMSFPQSA   | 0,7385 |
| A02 | HLA-A*02:77 | 1060 | VVFLHVITYV  | 0,6948 |
| A02 | HLA-A*02:77 | 1185 | RLNEVAKNL   | 0,6189 |
| A02 | HLA-A*02:77 | 1192 | NLNESLIDL   | 0,6972 |
| A02 | HLA-A*02:77 | 1220 | FIAGLIAIV   | 0,8207 |
| A02 | HLA-A*02:78 | 28   | YTNSFTRGV   | 0,6301 |
| A02 | HLA-A*02:78 | 62   | VTWFHAIHV   | 0,7122 |
| A02 | HLA-A*02:78 | 269  | YLQPRTFLL   | 0,5176 |
| A02 | HLA-A*02:78 | 417  | KIADYNYKL   | 0,8511 |
| A02 | HLA-A*02:78 | 634  | RVYSTGSNV   | 0,6719 |
| A02 | HLA-A*02:78 | 691  | SIIAYTMSL   | 0,7755 |
| A02 | HLA-A*02:78 | 712  | IAIPTNFTI   | 0,5958 |
| A02 | HLA-A*02:78 | 718  | FTISVTTEI   | 0,6858 |
| A02 | HLA-A*02:78 | 721  | SVTTEILPV   | 0,5092 |
| A02 | HLA-A*02:78 | 777  | NTQEVFAQV   | 0,5878 |
| A02 | HLA-A*02:78 | 1060 | VVFLHVITYV  | 0,7321 |
| A02 | HLA-A*02:78 | 1136 | TVYDPLQPEL  | 0,5843 |
| A02 | HLA-A*02:78 | 1171 | GINASVVNI   | 0,5371 |
| A02 | HLA-A*02:79 | 133  | FQFCNDPFL   | 0,7104 |
| A02 | HLA-A*02:79 | 133  | FQFCNDPFLGV | 0,5205 |
| A02 | HLA-A*02:79 | 269  | YLQPRTFLL   | 0,8955 |
| A02 | HLA-A*02:79 | 417  | KIADYNYKL   | 0,9064 |
| A02 | HLA-A*02:79 | 424  | KLPDDFTGCV  | 0,5686 |
| A02 | HLA-A*02:79 | 612  | YQDVNCTEV   | 0,5256 |
| A02 | HLA-A*02:79 | 691  | SIIAYTMSL   | 0,847  |
| A02 | HLA-A*02:79 | 712  | IAIPTNFTI   | 0,5224 |
| A02 | HLA-A*02:79 | 718  | FTISVTTEI   | 0,8184 |
| A02 | HLA-A*02:79 | 721  | SVTTEILPV   | 0,5642 |
| A02 | HLA-A*02:79 | 821  | LLFNKVTLA   | 0,5419 |
| A02 | HLA-A*02:79 | 894  | LQIPFAMQM   | 0,6147 |
| A02 | HLA-A*02:79 | 976  | VLNDILSRL   | 0,8346 |
| A02 | HLA-A*02:79 | 983  | RLDKVEAEV   | 0,6135 |
| A02 | HLA-A*02:79 | 1048 | HLMSFPQSA   | 0,5289 |
| A02 | HLA-A*02:79 | 1060 | VVFLHVITYV  | 0,7813 |
| A02 | HLA-A*02:79 | 1136 | TVYDPLQPEL  | 0,5968 |
| A02 | HLA-A*02:79 | 1220 | FIAGLIAIV   | 0,81   |
| A02 | HLA-A*02:85 | 109  | TLDSKTQSL   | 0,6782 |
| A02 | HLA-A*02:85 | 133  | FQFCNDPFL   | 0,518  |
| A02 | HLA-A*02:85 | 269  | YLQPRTFLL   | 0,973  |
| A02 | HLA-A*02:85 | 386  | KLNDLCFTNV  | 0,7108 |
| A02 | HLA-A*02:85 | 417  | KIADYNYKL   | 0,909  |
| A02 | HLA-A*02:85 | 424  | KLPDDFTGCV  | 0,5916 |
| A02 | HLA-A*02:85 | 515  | FELLHAPATV  | 0,6033 |
| A02 | HLA-A*02:85 | 610  | VLYQDVNCTEV | 0,5092 |



|     |             |      |             |        |
|-----|-------------|------|-------------|--------|
| A02 | HLA-A*02:85 | 691  | SIIAYTMSL   | 0,7995 |
| A02 | HLA-A*02:85 | 718  | FTISVTTEI   | 0,5257 |
| A02 | HLA-A*02:85 | 821  | LLFNKVTLA   | 0,7857 |
| A02 | HLA-A*02:85 | 857  | GLTVLPPLL   | 0,6786 |
| A02 | HLA-A*02:85 | 915  | VLYENQKLI   | 0,5378 |
| A02 | HLA-A*02:85 | 975  | SVLNDILSRL  | 0,5124 |
| A02 | HLA-A*02:85 | 976  | VLNDILSRL   | 0,9507 |
| A02 | HLA-A*02:85 | 983  | RLDKVEAEV   | 0,8609 |
| A02 | HLA-A*02:85 | 1000 | RLQSLQTYV   | 0,7431 |
| A02 | HLA-A*02:85 | 1047 | YHLMSFPQSA  | 0,5452 |
| A02 | HLA-A*02:85 | 1048 | HLMSFPQSA   | 0,7385 |
| A02 | HLA-A*02:85 | 1060 | VVFLHVITYV  | 0,6948 |
| A02 | HLA-A*02:85 | 1185 | RLNEVAKNL   | 0,6189 |
| A02 | HLA-A*02:85 | 1192 | NLNESLIDL   | 0,6972 |
| A02 | HLA-A*02:85 | 1220 | FIAGLIAIV   | 0,8207 |
| A02 | HLA-A*02:86 | 109  | TLDSKTQSL   | 0,6782 |
| A02 | HLA-A*02:86 | 133  | FQFCNDPFL   | 0,518  |
| A02 | HLA-A*02:86 | 269  | YLQPRTFLL   | 0,973  |
| A02 | HLA-A*02:86 | 386  | KLNDLCFTNV  | 0,7108 |
| A02 | HLA-A*02:86 | 417  | KIADYNYKL   | 0,909  |
| A02 | HLA-A*02:86 | 424  | KLPDDFTGCV  | 0,5916 |
| A02 | HLA-A*02:86 | 515  | FELLHAPATV  | 0,6033 |
| A02 | HLA-A*02:86 | 610  | VLYQDVNCTEV | 0,5092 |
| A02 | HLA-A*02:86 | 691  | SIIAYTMSL   | 0,7995 |
| A02 | HLA-A*02:86 | 718  | FTISVTTEI   | 0,5257 |
| A02 | HLA-A*02:86 | 821  | LLFNKVTLA   | 0,7857 |
| A02 | HLA-A*02:86 | 857  | GLTVLPPLL   | 0,6786 |
| A02 | HLA-A*02:86 | 915  | VLYENQKLI   | 0,5378 |
| A02 | HLA-A*02:86 | 975  | SVLNDILSRL  | 0,5124 |
| A02 | HLA-A*02:86 | 976  | VLNDILSRL   | 0,9507 |
| A02 | HLA-A*02:86 | 983  | RLDKVEAEV   | 0,8609 |
| A02 | HLA-A*02:86 | 1000 | RLQSLQTYV   | 0,7431 |
| A02 | HLA-A*02:86 | 1047 | YHLMSFPQSA  | 0,5452 |
| A02 | HLA-A*02:86 | 1048 | HLMSFPQSA   | 0,7385 |
| A02 | HLA-A*02:86 | 1060 | VVFLHVITYV  | 0,6948 |
| A02 | HLA-A*02:86 | 1185 | RLNEVAKNL   | 0,6189 |
| A02 | HLA-A*02:86 | 1192 | NLNESLIDL   | 0,6972 |
| A02 | HLA-A*02:86 | 1220 | FIAGLIAIV   | 0,8207 |
| A02 | HLA-A*68:02 | 28   | YTNSFTRGV   | 0,845  |
| A02 | HLA-A*68:02 | 122  | NATNVVIVK   | 0,7315 |
| A02 | HLA-A*68:02 | 258  | WTAGAAAYYV  | 0,5761 |
| A02 | HLA-A*68:02 | 259  | TAGAAAYYV   | 0,5379 |
| A02 | HLA-A*68:02 | 340  | EVFNATRFA   | 0,7317 |
| A02 | HLA-A*68:02 | 394  | NVYADSFVI   | 0,6993 |
| A02 | HLA-A*68:02 | 495  | YGFQPTNGV   | 0,5183 |
| A02 | HLA-A*68:02 | 568  | DIADTTDAV   | 0,7805 |
| A02 | HLA-A*68:02 | 603  | NTSNQVAVL   | 0,5558 |
| A02 | HLA-A*68:02 | 691  | SIIAYTMSL   | 0,6292 |
| A02 | HLA-A*68:02 | 704  | SVAYSNNSI   | 0,7306 |
| A02 | HLA-A*68:02 | 717  | NFTISVTTEI  | 0,6193 |

|     |             |      |            |        |
|-----|-------------|------|------------|--------|
| A02 | HLA-A*68:02 | 718  | FTISVTTEI  | 0,9208 |
| A02 | HLA-A*68:02 | 734  | TSVDCTMYI  | 0,5115 |
| A02 | HLA-A*68:02 | 777  | NTQEVFAQV  | 0,9221 |
| A02 | HLA-A*68:02 | 780  | EVFAQVKQI  | 0,6531 |
| A02 | HLA-A*68:02 | 869  | MIAQYTSAL  | 0,6202 |
| A02 | HLA-A*68:02 | 886  | WTFGAGAAL  | 0,732  |
| A02 | HLA-A*68:02 | 907  | NGIGVTQNV  | 0,5186 |
| A02 | HLA-A*68:02 | 940  | STASALGKL  | 0,5142 |
| A02 | HLA-A*68:02 | 1060 | VVFLHVTYV  | 0,6649 |
| A02 | HLA-A*68:02 | 1095 | FVSNGTHWV  | 0,5041 |
| A02 | HLA-A*68:02 | 1128 | VVIGVNNTV  | 0,5513 |
| A02 | HLA-A*68:02 | 1136 | TVYDPLQPEL | 0,6066 |
| A02 | HLA-A*68:02 | 1168 | DISGINASV  | 0,8721 |
| A02 | HLA-A*68:02 | 1220 | FIAGLIAIV  | 0,636  |
| A02 | HLA-A*68:27 | 28   | YTNSFTRGV  | 0,845  |
| A02 | HLA-A*68:27 | 122  | NATNVVIKV  | 0,7315 |
| A02 | HLA-A*68:27 | 258  | WTAGAAAYYV | 0,5761 |
| A02 | HLA-A*68:27 | 259  | TAGAAAYYV  | 0,5379 |
| A02 | HLA-A*68:27 | 340  | EVFNATRFA  | 0,7317 |
| A02 | HLA-A*68:27 | 394  | NVYADSFVI  | 0,6993 |
| A02 | HLA-A*68:27 | 495  | YGFQPTNGV  | 0,5183 |
| A02 | HLA-A*68:27 | 568  | DIADTTDAV  | 0,7805 |
| A02 | HLA-A*68:27 | 603  | NTSNQVAVL  | 0,5558 |
| A02 | HLA-A*68:27 | 691  | SIIAYTMSL  | 0,6292 |
| A02 | HLA-A*68:27 | 704  | SVAYSNNSI  | 0,7306 |
| A02 | HLA-A*68:27 | 717  | NFTISVTTEI | 0,6193 |
| A02 | HLA-A*68:27 | 718  | FTISVTTEI  | 0,9208 |
| A02 | HLA-A*68:27 | 734  | TSVDCTMYI  | 0,5115 |
| A02 | HLA-A*68:27 | 777  | NTQEVFAQV  | 0,9221 |
| A02 | HLA-A*68:27 | 780  | EVFAQVKQI  | 0,6531 |
| A02 | HLA-A*68:27 | 869  | MIAQYTSAL  | 0,6202 |
| A02 | HLA-A*68:27 | 886  | WTFGAGAAL  | 0,732  |
| A02 | HLA-A*68:27 | 907  | NGIGVTQNV  | 0,5186 |
| A02 | HLA-A*68:27 | 940  | STASALGKL  | 0,5142 |
| A02 | HLA-A*68:27 | 1060 | VVFLHVTYV  | 0,6649 |
| A02 | HLA-A*68:27 | 1095 | FVSNGTHWV  | 0,5041 |
| A02 | HLA-A*68:27 | 1128 | VVIGVNNTV  | 0,5513 |
| A02 | HLA-A*68:27 | 1136 | TVYDPLQPEL | 0,6066 |
| A02 | HLA-A*68:27 | 1168 | DISGINASV  | 0,8721 |
| A02 | HLA-A*68:27 | 1220 | FIAGLIAIV  | 0,636  |
| A02 | HLA-A*68:28 | 28   | YTNSFTRGV  | 0,5476 |
| A02 | HLA-A*68:28 | 568  | DIADTTDAV  | 0,6854 |
| A02 | HLA-A*68:28 | 718  | FTISVTTEI  | 0,6638 |
| A02 | HLA-A*68:28 | 777  | NTQEVFAQV  | 0,7667 |
| A02 | HLA-A*68:28 | 1168 | DISGINASV  | 0,5957 |
| A02 | HLA-A*69:01 | 28   | YTNSFTRGV  | 0,6754 |
| A02 | HLA-A*69:01 | 62   | VTWFHAIHV  | 0,5639 |
| A02 | HLA-A*69:01 | 122  | NATNVVIKV  | 0,6388 |
| A02 | HLA-A*69:01 | 394  | NVYADSFVI  | 0,702  |
| A02 | HLA-A*69:01 | 568  | DIADTTDAV  | 0,62   |

|     |             |      |              |        |
|-----|-------------|------|--------------|--------|
| A02 | HLA-A*69:01 | 691  | SIHAYTMSL    | 0,6455 |
| A02 | HLA-A*69:01 | 718  | FTISVTTEI    | 0,8233 |
| A02 | HLA-A*69:01 | 777  | NTQEVFAQV    | 0,8811 |
| A02 | HLA-A*69:01 | 780  | EVFAQVKQI    | 0,5161 |
| A02 | HLA-A*69:01 | 886  | WTFGAGAAL    | 0,6113 |
| A02 | HLA-A*69:01 | 1060 | VVFLHVTYV    | 0,6659 |
| A02 | HLA-A*69:01 | 1136 | TVYDPLQPEL   | 0,6066 |
| A02 | HLA-A*69:01 | 1168 | DISGINASV    | 0,7179 |
| A02 | HLA-A*69:01 | 1220 | FIAGLIAIV    | 0,5133 |
| A03 | HLA-A*03:01 | 35   | GVYYPDKVFR   | 0,568  |
| A03 | HLA-A*03:01 | 41   | KVFRSSVLH    | 0,6944 |
| A03 | HLA-A*03:01 | 89   | GVYFASTEK    | 0,9487 |
| A03 | HLA-A*03:01 | 142  | GVYYHKNNK    | 0,8871 |
| A03 | HLA-A*03:01 | 269  | YLQPRTFLK    | 0,5577 |
| A03 | HLA-A*03:01 | 302  | TLKSFTVEK    | 0,8988 |
| A03 | HLA-A*03:01 | 311  | GIYQTSNFR    | 0,6304 |
| A03 | HLA-A*03:01 | 349  | SVYAWNRRK    | 0,6333 |
| A03 | HLA-A*03:01 | 367  | VLVNSASFSTFK | 0,5358 |
| A03 | HLA-A*03:01 | 378  | KCYGVSPK     | 0,5631 |
| A03 | HLA-A*03:01 | 408  | RQIAPGQTGK   | 0,8957 |
| A03 | HLA-A*03:01 | 409  | QIAPGQTGK    | 0,6982 |
| A03 | HLA-A*03:01 | 454  | RLFRKSNLK    | 0,9589 |
| A03 | HLA-A*03:01 | 529  | KSTNLVKNK    | 0,5122 |
| A03 | HLA-A*03:01 | 724  | TEILPVSMK    | 0,6838 |
| A03 | HLA-A*03:01 | 786  | KQIYKTPPIK   | 0,8503 |
| A03 | HLA-A*03:01 | 787  | QIYKTPPIK    | 0,8934 |
| A03 | HLA-A*03:01 | 805  | ILPDPSKPSK   | 0,5588 |
| A03 | HLA-A*03:01 | 826  | VTLADAGFIK   | 0,5395 |
| A03 | HLA-A*03:01 | 827  | TLADAGFIK    | 0,7267 |
| A03 | HLA-A*03:01 | 924  | ANQFNLSAIGK  | 0,5091 |
| A03 | HLA-A*03:01 | 939  | SSTASALGK    | 0,5175 |
| A03 | HLA-A*03:01 | 1019 | RASANLAATK   | 0,5521 |
| A03 | HLA-A*03:01 | 1020 | ASANLAATK    | 0,7894 |
| A03 | HLA-A*03:01 | 1064 | HVTYVPAQEK   | 0,6951 |
| A03 | HLA-A*03:01 | 1065 | VTYVPAQEK    | 0,9087 |
| A03 | HLA-A*03:01 | 1099 | GTHWFVTQR    | 0,5011 |
| A03 | HLA-A*03:01 | 1196 | SLIDLQELGK   | 0,6419 |
| A03 | HLA-A*03:01 | 1264 | VLKGVKLHY    | 0,6718 |
| A03 | HLA-A*03:02 | 35   | GVYYPDKVFR   | 0,6162 |
| A03 | HLA-A*03:02 | 89   | GVYFASTEK    | 0,8282 |
| A03 | HLA-A*03:02 | 142  | GVYYHKNNK    | 0,6008 |
| A03 | HLA-A*03:02 | 269  | YLQPRTFLK    | 0,5505 |
| A03 | HLA-A*03:02 | 292  | ALDPLSETK    | 0,7332 |
| A03 | HLA-A*03:02 | 302  | TLKSFTVEK    | 0,8355 |
| A03 | HLA-A*03:02 | 311  | GIYQTSNFR    | 0,6485 |
| A03 | HLA-A*03:02 | 349  | SVYAWNRRK    | 0,5515 |
| A03 | HLA-A*03:02 | 408  | RQIAPGQTGK   | 0,607  |
| A03 | HLA-A*03:02 | 454  | RLFRKSNLK    | 0,8224 |
| A03 | HLA-A*03:02 | 724  | TEILPVSMK    | 0,5896 |
| A03 | HLA-A*03:02 | 725  | EILPVSMK     | 0,5252 |

|     |             |      |              |        |
|-----|-------------|------|--------------|--------|
| A03 | HLA-A*03:02 | 787  | QIYKTPPIK    | 0,6603 |
| A03 | HLA-A*03:02 | 805  | ILPDPSKPSK   | 0,52   |
| A03 | HLA-A*03:02 | 826  | VTLADAGFIK   | 0,5723 |
| A03 | HLA-A*03:02 | 827  | TLADAGFIK    | 0,8003 |
| A03 | HLA-A*03:02 | 975  | SVLNDILSR    | 0,6428 |
| A03 | HLA-A*03:02 | 1020 | ASANLAATK    | 0,6797 |
| A03 | HLA-A*03:02 | 1065 | VTYVPAQEK    | 0,744  |
| A03 | HLA-A*03:02 | 1099 | GTHWFVTQR    | 0,5647 |
| A03 | HLA-A*03:02 | 1196 | SLIDLQELGK   | 0,5484 |
| A03 | HLA-A*03:04 | 35   | GVYYPDKVFR   | 0,568  |
| A03 | HLA-A*03:04 | 41   | KVFRSSVLH    | 0,6944 |
| A03 | HLA-A*03:04 | 89   | GVYFASTEK    | 0,9487 |
| A03 | HLA-A*03:04 | 142  | GVYYHKNNK    | 0,8871 |
| A03 | HLA-A*03:04 | 269  | YLQPRTFLK    | 0,5577 |
| A03 | HLA-A*03:04 | 302  | TLKSFTVEK    | 0,8988 |
| A03 | HLA-A*03:04 | 311  | GIYQTSNFR    | 0,6304 |
| A03 | HLA-A*03:04 | 349  | SVYAWNRRK    | 0,6333 |
| A03 | HLA-A*03:04 | 367  | VLVNSASFSTFK | 0,5358 |
| A03 | HLA-A*03:04 | 378  | KCYGVSPK     | 0,5631 |
| A03 | HLA-A*03:04 | 408  | RQIAPGQTGK   | 0,8957 |
| A03 | HLA-A*03:04 | 409  | QIAPGQTGK    | 0,6982 |
| A03 | HLA-A*03:04 | 454  | RLFRKSNLK    | 0,9589 |
| A03 | HLA-A*03:04 | 529  | KSTNLVKNK    | 0,5122 |
| A03 | HLA-A*03:04 | 724  | TEILPVSMK    | 0,6838 |
| A03 | HLA-A*03:04 | 786  | KQIYKTPPIK   | 0,8503 |
| A03 | HLA-A*03:04 | 787  | QIYKTPPIK    | 0,8934 |
| A03 | HLA-A*03:04 | 805  | ILPDPSKPSK   | 0,5588 |
| A03 | HLA-A*03:04 | 826  | VTLADAGFIK   | 0,5395 |
| A03 | HLA-A*03:04 | 827  | TLADAGFIK    | 0,7267 |
| A03 | HLA-A*03:04 | 924  | ANQFNSAIGK   | 0,5091 |
| A03 | HLA-A*03:04 | 939  | SSTASALGK    | 0,5175 |
| A03 | HLA-A*03:04 | 1019 | RASANLAATK   | 0,5521 |
| A03 | HLA-A*03:04 | 1020 | ASANLAATK    | 0,7894 |
| A03 | HLA-A*03:04 | 1064 | HVTYVPAQEK   | 0,6951 |
| A03 | HLA-A*03:04 | 1065 | VTYVPAQEK    | 0,9087 |
| A03 | HLA-A*03:04 | 1099 | GTHWFVTQR    | 0,5011 |
| A03 | HLA-A*03:04 | 1196 | SLIDLQELGK   | 0,6419 |
| A03 | HLA-A*03:04 | 1264 | VLKGVKLHY    | 0,6718 |
| A03 | HLA-A*03:05 | 35   | GVYYPDKVFR   | 0,568  |
| A03 | HLA-A*03:05 | 41   | KVFRSSVLH    | 0,6944 |
| A03 | HLA-A*03:05 | 89   | GVYFASTEK    | 0,9487 |
| A03 | HLA-A*03:05 | 142  | GVYYHKNNK    | 0,8871 |
| A03 | HLA-A*03:05 | 269  | YLQPRTFLK    | 0,5577 |
| A03 | HLA-A*03:05 | 302  | TLKSFTVEK    | 0,8988 |
| A03 | HLA-A*03:05 | 311  | GIYQTSNFR    | 0,6304 |
| A03 | HLA-A*03:05 | 349  | SVYAWNRRK    | 0,6333 |
| A03 | HLA-A*03:05 | 367  | VLVNSASFSTFK | 0,5358 |
| A03 | HLA-A*03:05 | 378  | KCYGVSPK     | 0,5631 |
| A03 | HLA-A*03:05 | 408  | RQIAPGQTGK   | 0,8957 |
| A03 | HLA-A*03:05 | 409  | QIAPGQTGK    | 0,6982 |

|     |             |      |              |        |
|-----|-------------|------|--------------|--------|
| A03 | HLA-A*03:05 | 454  | RLFRKSNLK    | 0,9589 |
| A03 | HLA-A*03:05 | 529  | KSTNLVKNK    | 0,5122 |
| A03 | HLA-A*03:05 | 724  | TEILPVSMTK   | 0,6838 |
| A03 | HLA-A*03:05 | 786  | KQIYKTPPIK   | 0,8503 |
| A03 | HLA-A*03:05 | 787  | QIYKTPPIK    | 0,8934 |
| A03 | HLA-A*03:05 | 805  | ILPDPSKPSK   | 0,5588 |
| A03 | HLA-A*03:05 | 826  | VTLADAGFIK   | 0,5395 |
| A03 | HLA-A*03:05 | 827  | TLADAGFIK    | 0,7267 |
| A03 | HLA-A*03:05 | 924  | ANQFNSAIGK   | 0,5091 |
| A03 | HLA-A*03:05 | 939  | SSTASALGK    | 0,5175 |
| A03 | HLA-A*03:05 | 1019 | RASANLAATK   | 0,5521 |
| A03 | HLA-A*03:05 | 1020 | ASANLAATK    | 0,7894 |
| A03 | HLA-A*03:05 | 1064 | HVTYVPAQEK   | 0,6951 |
| A03 | HLA-A*03:05 | 1065 | VTYVPAQEK    | 0,9087 |
| A03 | HLA-A*03:05 | 1099 | GTHWFVTQR    | 0,5011 |
| A03 | HLA-A*03:05 | 1196 | SLIDLQELGK   | 0,6419 |
| A03 | HLA-A*03:05 | 1264 | VLKGVKLHY    | 0,6718 |
| A03 | HLA-A*03:06 | 35   | GVYYPDKVFR   | 0,568  |
| A03 | HLA-A*03:06 | 41   | KVFRSSVLH    | 0,6944 |
| A03 | HLA-A*03:06 | 89   | GVYFASTEK    | 0,9487 |
| A03 | HLA-A*03:06 | 142  | GVYYHKNNK    | 0,8871 |
| A03 | HLA-A*03:06 | 269  | YLQPRTFLLK   | 0,5577 |
| A03 | HLA-A*03:06 | 302  | TLKSFTVEK    | 0,8988 |
| A03 | HLA-A*03:06 | 311  | GIYQTSNFR    | 0,6304 |
| A03 | HLA-A*03:06 | 349  | SVYAWNRRK    | 0,6333 |
| A03 | HLA-A*03:06 | 367  | VLYNSASFSTFK | 0,5358 |
| A03 | HLA-A*03:06 | 378  | KCYGVSPTK    | 0,5631 |
| A03 | HLA-A*03:06 | 408  | RQIAPGQTGK   | 0,8957 |
| A03 | HLA-A*03:06 | 409  | QIAPGQTGK    | 0,6982 |
| A03 | HLA-A*03:06 | 454  | RLFRKSNLK    | 0,9589 |
| A03 | HLA-A*03:06 | 529  | KSTNLVKNK    | 0,5122 |
| A03 | HLA-A*03:06 | 724  | TEILPVSMTK   | 0,6838 |
| A03 | HLA-A*03:06 | 786  | KQIYKTPPIK   | 0,8503 |
| A03 | HLA-A*03:06 | 787  | QIYKTPPIK    | 0,8934 |
| A03 | HLA-A*03:06 | 805  | ILPDPSKPSK   | 0,5588 |
| A03 | HLA-A*03:06 | 826  | VTLADAGFIK   | 0,5395 |
| A03 | HLA-A*03:06 | 827  | TLADAGFIK    | 0,7267 |
| A03 | HLA-A*03:06 | 924  | ANQFNSAIGK   | 0,5091 |
| A03 | HLA-A*03:06 | 939  | SSTASALGK    | 0,5175 |
| A03 | HLA-A*03:06 | 1019 | RASANLAATK   | 0,5521 |
| A03 | HLA-A*03:06 | 1020 | ASANLAATK    | 0,7894 |
| A03 | HLA-A*03:06 | 1064 | HVTYVPAQEK   | 0,6951 |
| A03 | HLA-A*03:06 | 1065 | VTYVPAQEK    | 0,9087 |
| A03 | HLA-A*03:06 | 1099 | GTHWFVTQR    | 0,5011 |
| A03 | HLA-A*03:06 | 1196 | SLIDLQELGK   | 0,6419 |
| A03 | HLA-A*03:06 | 1264 | VLKGVKLHY    | 0,6718 |
| A03 | HLA-A*03:07 | 35   | GVYYPDKVFR   | 0,7348 |
| A03 | HLA-A*03:07 | 89   | GVYFASTEK    | 0,8648 |
| A03 | HLA-A*03:07 | 142  | GVYYHKNNK    | 0,6702 |
| A03 | HLA-A*03:07 | 292  | ALDPLSETK    | 0,6955 |

|     |             |      |            |        |
|-----|-------------|------|------------|--------|
| A03 | HLA-A*03:07 | 302  | TLKSFTVEK  | 0,8407 |
| A03 | HLA-A*03:07 | 311  | GIYQTSNFR  | 0,7033 |
| A03 | HLA-A*03:07 | 349  | SVYAWNRRKR | 0,6804 |
| A03 | HLA-A*03:07 | 370  | NSASFSTFK  | 0,5695 |
| A03 | HLA-A*03:07 | 408  | RQIAPGQTGK | 0,6507 |
| A03 | HLA-A*03:07 | 454  | RLFRKSNLK  | 0,8435 |
| A03 | HLA-A*03:07 | 458  | KSNLKPFER  | 0,5539 |
| A03 | HLA-A*03:07 | 724  | TEILPVSMTK | 0,6479 |
| A03 | HLA-A*03:07 | 725  | EILPVSMTK  | 0,6008 |
| A03 | HLA-A*03:07 | 786  | KQIYKTPPIK | 0,5627 |
| A03 | HLA-A*03:07 | 787  | QIYKTPPIK  | 0,757  |
| A03 | HLA-A*03:07 | 805  | ILPDPSKPSK | 0,5158 |
| A03 | HLA-A*03:07 | 826  | VTLADAGFIK | 0,6103 |
| A03 | HLA-A*03:07 | 827  | TLADAGFIK  | 0,8004 |
| A03 | HLA-A*03:07 | 975  | SVLNDILSR  | 0,744  |
| A03 | HLA-A*03:07 | 1020 | ASANLAATK  | 0,7263 |
| A03 | HLA-A*03:07 | 1064 | HVTYVPAQEK | 0,5071 |
| A03 | HLA-A*03:07 | 1065 | VTYVPAQEK  | 0,8254 |
| A03 | HLA-A*03:07 | 1099 | GTHWFVTQR  | 0,6685 |
| A03 | HLA-A*03:07 | 1196 | SLIDLQELGK | 0,6149 |
| A03 | HLA-A*03:08 | 35   | GVYYPDKVFR | 0,5777 |
| A03 | HLA-A*03:08 | 41   | KVFRSSVLH  | 0,5336 |
| A03 | HLA-A*03:08 | 89   | GVYFASTEK  | 0,8234 |
| A03 | HLA-A*03:08 | 142  | GVYYHKNNK  | 0,7338 |
| A03 | HLA-A*03:08 | 302  | TLKSFTVEK  | 0,7823 |
| A03 | HLA-A*03:08 | 311  | GIYQTSNFR  | 0,623  |
| A03 | HLA-A*03:08 | 349  | SVYAWNRRKR | 0,6585 |
| A03 | HLA-A*03:08 | 408  | RQIAPGQTGK | 0,7314 |
| A03 | HLA-A*03:08 | 454  | RLFRKSNLK  | 0,9008 |
| A03 | HLA-A*03:08 | 786  | KQIYKTPPIK | 0,6142 |
| A03 | HLA-A*03:08 | 787  | QIYKTPPIK  | 0,679  |
| A03 | HLA-A*03:08 | 1020 | ASANLAATK  | 0,5793 |
| A03 | HLA-A*03:08 | 1065 | VTYVPAQEK  | 0,7028 |
| A03 | HLA-A*03:08 | 1099 | GTHWFVTQR  | 0,5336 |
| A03 | HLA-A*03:10 | 35   | GVYYPDKVFR | 0,6162 |
| A03 | HLA-A*03:10 | 89   | GVYFASTEK  | 0,8282 |
| A03 | HLA-A*03:10 | 142  | GVYYHKNNK  | 0,6008 |
| A03 | HLA-A*03:10 | 269  | YLQPRTFLK  | 0,5505 |
| A03 | HLA-A*03:10 | 292  | ALDPLSETK  | 0,7332 |
| A03 | HLA-A*03:10 | 302  | TLKSFTVEK  | 0,8355 |
| A03 | HLA-A*03:10 | 311  | GIYQTSNFR  | 0,6485 |
| A03 | HLA-A*03:10 | 349  | SVYAWNRRKR | 0,5515 |
| A03 | HLA-A*03:10 | 408  | RQIAPGQTGK | 0,607  |
| A03 | HLA-A*03:10 | 454  | RLFRKSNLK  | 0,8224 |
| A03 | HLA-A*03:10 | 724  | TEILPVSMTK | 0,5896 |
| A03 | HLA-A*03:10 | 725  | EILPVSMTK  | 0,5252 |
| A03 | HLA-A*03:10 | 787  | QIYKTPPIK  | 0,6603 |
| A03 | HLA-A*03:10 | 805  | ILPDPSKPSK | 0,52   |
| A03 | HLA-A*03:10 | 826  | VTLADAGFIK | 0,5723 |
| A03 | HLA-A*03:10 | 827  | TLADAGFIK  | 0,8003 |

|     |             |      |              |        |
|-----|-------------|------|--------------|--------|
| A03 | HLA-A*03:10 | 975  | SVLNDILSR    | 0,6428 |
| A03 | HLA-A*03:10 | 1020 | ASANLAATK    | 0,6797 |
| A03 | HLA-A*03:10 | 1065 | VTYVPAQEK    | 0,744  |
| A03 | HLA-A*03:10 | 1099 | GTHWFVTQR    | 0,5647 |
| A03 | HLA-A*03:10 | 1196 | SLIDLQELGK   | 0,5484 |
| A03 | HLA-A*03:12 | 35   | GVYYPDKVFR   | 0,6548 |
| A03 | HLA-A*03:12 | 41   | KVFRSSVLH    | 0,7788 |
| A03 | HLA-A*03:12 | 69   | HVSGTNGTK    | 0,5995 |
| A03 | HLA-A*03:12 | 89   | GVYFASTEK    | 0,9495 |
| A03 | HLA-A*03:12 | 142  | GVYYHKNNK    | 0,8976 |
| A03 | HLA-A*03:12 | 302  | TLKSFTVEK    | 0,8641 |
| A03 | HLA-A*03:12 | 311  | GIYQTSNFR    | 0,6653 |
| A03 | HLA-A*03:12 | 348  | ASVYAWNRRK   | 0,6546 |
| A03 | HLA-A*03:12 | 349  | SVYAWNRRKR   | 0,7468 |
| A03 | HLA-A*03:12 | 370  | NSASFSTFK    | 0,6426 |
| A03 | HLA-A*03:12 | 375  | STFKCYGVSPTK | 0,5581 |
| A03 | HLA-A*03:12 | 378  | KCYGVSPTK    | 0,6783 |
| A03 | HLA-A*03:12 | 408  | RQIAPGQTGK   | 0,8931 |
| A03 | HLA-A*03:12 | 409  | QIAPGQTGK    | 0,7544 |
| A03 | HLA-A*03:12 | 454  | RLFRKSNLK    | 0,9223 |
| A03 | HLA-A*03:12 | 458  | KSNLKPFER    | 0,5408 |
| A03 | HLA-A*03:12 | 529  | KSTNLVKNK    | 0,7666 |
| A03 | HLA-A*03:12 | 550  | GVLTESNKK    | 0,6481 |
| A03 | HLA-A*03:12 | 724  | TEILPVSMTK   | 0,6899 |
| A03 | HLA-A*03:12 | 725  | EILPVSMTK    | 0,7052 |
| A03 | HLA-A*03:12 | 786  | KQIYKTPPIK   | 0,7729 |
| A03 | HLA-A*03:12 | 787  | QIYKTPPIK    | 0,8972 |
| A03 | HLA-A*03:12 | 803  | SQILPDPSK    | 0,5075 |
| A03 | HLA-A*03:12 | 826  | VTLADAGFIK   | 0,5973 |
| A03 | HLA-A*03:12 | 827  | TLADAGFIK    | 0,6931 |
| A03 | HLA-A*03:12 | 845  | AARDLICAQK   | 0,5375 |
| A03 | HLA-A*03:12 | 924  | ANQFNSAIGK   | 0,679  |
| A03 | HLA-A*03:12 | 925  | NQFNSAIGK    | 0,6061 |
| A03 | HLA-A*03:12 | 939  | SSTASALGK    | 0,7158 |
| A03 | HLA-A*03:12 | 956  | AQALNTLVK    | 0,5799 |
| A03 | HLA-A*03:12 | 975  | SVLNDILSR    | 0,7042 |
| A03 | HLA-A*03:12 | 1019 | RASANLAATK   | 0,6895 |
| A03 | HLA-A*03:12 | 1020 | ASANLAATK    | 0,8887 |
| A03 | HLA-A*03:12 | 1064 | HVTYVPAQEK   | 0,7577 |
| A03 | HLA-A*03:12 | 1065 | VTYVPAQEK    | 0,9408 |
| A03 | HLA-A*03:12 | 1099 | GTHWFVTQR    | 0,7035 |
| A03 | HLA-A*03:12 | 1196 | SLIDLQELGK   | 0,5515 |
| A03 | HLA-A*03:12 | 1264 | VLKGVKLHY    | 0,6239 |
| A03 | HLA-A*03:13 | 35   | GVYYPDKVFR   | 0,568  |
| A03 | HLA-A*03:13 | 41   | KVFRSSVLH    | 0,6944 |
| A03 | HLA-A*03:13 | 89   | GVYFASTEK    | 0,9487 |
| A03 | HLA-A*03:13 | 142  | GVYYHKNNK    | 0,8871 |
| A03 | HLA-A*03:13 | 269  | YLQPRTFLK    | 0,5577 |
| A03 | HLA-A*03:13 | 302  | TLKSFTVEK    | 0,8988 |
| A03 | HLA-A*03:13 | 311  | GIYQTSNFR    | 0,6304 |

|     |             |      |              |        |
|-----|-------------|------|--------------|--------|
| A03 | HLA-A*03:13 | 349  | SVYAWNRRKR   | 0,6333 |
| A03 | HLA-A*03:13 | 367  | VLVNSASFSTFK | 0,5358 |
| A03 | HLA-A*03:13 | 378  | KCYGVSPTK    | 0,5631 |
| A03 | HLA-A*03:13 | 408  | RQIAPGQTGK   | 0,8957 |
| A03 | HLA-A*03:13 | 409  | QIAPGQTGK    | 0,6982 |
| A03 | HLA-A*03:13 | 454  | RLFRKSNLK    | 0,9589 |
| A03 | HLA-A*03:13 | 529  | KSTNLVKNK    | 0,5122 |
| A03 | HLA-A*03:13 | 724  | TEILPVSMTK   | 0,6838 |
| A03 | HLA-A*03:13 | 786  | KQIYKTPPIK   | 0,8503 |
| A03 | HLA-A*03:13 | 787  | QIYKTPPIK    | 0,8934 |
| A03 | HLA-A*03:13 | 805  | ILPDPSKPSK   | 0,5588 |
| A03 | HLA-A*03:13 | 826  | VTLADAGFIK   | 0,5395 |
| A03 | HLA-A*03:13 | 827  | TLADAGFIK    | 0,7267 |
| A03 | HLA-A*03:13 | 924  | ANQFNSAIGK   | 0,5091 |
| A03 | HLA-A*03:13 | 939  | SSTASALGK    | 0,5175 |
| A03 | HLA-A*03:13 | 1019 | RASANLAATK   | 0,5521 |
| A03 | HLA-A*03:13 | 1020 | ASANLAATK    | 0,7894 |
| A03 | HLA-A*03:13 | 1064 | HVTYVPAQEK   | 0,6951 |
| A03 | HLA-A*03:13 | 1065 | VTYVPAQEK    | 0,9087 |
| A03 | HLA-A*03:13 | 1099 | GTHWFVTQR    | 0,5011 |
| A03 | HLA-A*03:13 | 1196 | SLIDLQELGK   | 0,6419 |
| A03 | HLA-A*03:13 | 1264 | VLKGVKLHY    | 0,6718 |
| A03 | HLA-A*03:14 | 35   | GVYYPDKVFR   | 0,568  |
| A03 | HLA-A*03:14 | 41   | KVFRSSVLH    | 0,6944 |
| A03 | HLA-A*03:14 | 89   | GVYFASTEK    | 0,9487 |
| A03 | HLA-A*03:14 | 142  | GVYYHKNNK    | 0,8871 |
| A03 | HLA-A*03:14 | 269  | YLQPRTFLK    | 0,5577 |
| A03 | HLA-A*03:14 | 302  | TLKSFTVEK    | 0,8988 |
| A03 | HLA-A*03:14 | 311  | GIYQTSNFR    | 0,6304 |
| A03 | HLA-A*03:14 | 349  | SVYAWNRRKR   | 0,6333 |
| A03 | HLA-A*03:14 | 367  | VLVNSASFSTFK | 0,5358 |
| A03 | HLA-A*03:14 | 378  | KCYGVSPTK    | 0,5631 |
| A03 | HLA-A*03:14 | 408  | RQIAPGQTGK   | 0,8957 |
| A03 | HLA-A*03:14 | 409  | QIAPGQTGK    | 0,6982 |
| A03 | HLA-A*03:14 | 454  | RLFRKSNLK    | 0,9589 |
| A03 | HLA-A*03:14 | 529  | KSTNLVKNK    | 0,5122 |
| A03 | HLA-A*03:14 | 724  | TEILPVSMTK   | 0,6838 |
| A03 | HLA-A*03:14 | 786  | KQIYKTPPIK   | 0,8503 |
| A03 | HLA-A*03:14 | 787  | QIYKTPPIK    | 0,8934 |
| A03 | HLA-A*03:14 | 805  | ILPDPSKPSK   | 0,5588 |
| A03 | HLA-A*03:14 | 826  | VTLADAGFIK   | 0,5395 |
| A03 | HLA-A*03:14 | 827  | TLADAGFIK    | 0,7267 |
| A03 | HLA-A*03:14 | 924  | ANQFNSAIGK   | 0,5091 |
| A03 | HLA-A*03:14 | 939  | SSTASALGK    | 0,5175 |
| A03 | HLA-A*03:14 | 1019 | RASANLAATK   | 0,5521 |
| A03 | HLA-A*03:14 | 1020 | ASANLAATK    | 0,7894 |
| A03 | HLA-A*03:14 | 1064 | HVTYVPAQEK   | 0,6951 |
| A03 | HLA-A*03:14 | 1065 | VTYVPAQEK    | 0,9087 |
| A03 | HLA-A*03:14 | 1099 | GTHWFVTQR    | 0,5011 |
| A03 | HLA-A*03:14 | 1196 | SLIDLQELGK   | 0,6419 |



|     |             |      |              |        |
|-----|-------------|------|--------------|--------|
| A03 | HLA-A*03:14 | 1264 | VLKGVKLHY    | 0,6718 |
| A03 | HLA-A*03:16 | 35   | GVYYPDKVFR   | 0,568  |
| A03 | HLA-A*03:16 | 41   | KVFRSSVLH    | 0,6944 |
| A03 | HLA-A*03:16 | 89   | GVYFASTEK    | 0,9487 |
| A03 | HLA-A*03:16 | 142  | GVYYHKNNK    | 0,8871 |
| A03 | HLA-A*03:16 | 269  | YLQPRTFLLK   | 0,5577 |
| A03 | HLA-A*03:16 | 302  | TLKSFTVEK    | 0,8988 |
| A03 | HLA-A*03:16 | 311  | GIYQTSNFR    | 0,6304 |
| A03 | HLA-A*03:16 | 349  | SVYAWNRRK    | 0,6333 |
| A03 | HLA-A*03:16 | 367  | VLVNSASFSTFK | 0,5358 |
| A03 | HLA-A*03:16 | 378  | KCYGVSPK     | 0,5631 |
| A03 | HLA-A*03:16 | 408  | RQIAPGQTGK   | 0,8957 |
| A03 | HLA-A*03:16 | 409  | QIAPGQTGK    | 0,6982 |
| A03 | HLA-A*03:16 | 454  | RLFRKSNLK    | 0,9589 |
| A03 | HLA-A*03:16 | 529  | KSTNLVKNK    | 0,5122 |
| A03 | HLA-A*03:16 | 724  | TEILPVSMK    | 0,6838 |
| A03 | HLA-A*03:16 | 786  | KQIYKTPPIK   | 0,8503 |
| A03 | HLA-A*03:16 | 787  | QIYKTPPIK    | 0,8934 |
| A03 | HLA-A*03:16 | 805  | ILPDPSKPSK   | 0,5588 |
| A03 | HLA-A*03:16 | 826  | VTLADAGFIK   | 0,5395 |
| A03 | HLA-A*03:16 | 827  | TLADAGFIK    | 0,7267 |
| A03 | HLA-A*03:16 | 924  | ANQFNSAIGK   | 0,5091 |
| A03 | HLA-A*03:16 | 939  | SSTASALGK    | 0,5175 |
| A03 | HLA-A*03:16 | 1019 | RASANLAATK   | 0,5521 |
| A03 | HLA-A*03:16 | 1020 | ASANLAATK    | 0,7894 |
| A03 | HLA-A*03:16 | 1064 | HVTYVPAQEK   | 0,6951 |
| A03 | HLA-A*03:16 | 1065 | VTYVPAQEK    | 0,9087 |
| A03 | HLA-A*03:16 | 1099 | GTHWFVTQR    | 0,5011 |
| A03 | HLA-A*03:16 | 1196 | SLIDLQELGK   | 0,6419 |
| A03 | HLA-A*03:16 | 1264 | VLKGVKLHY    | 0,6718 |
| A03 | HLA-A*03:17 | 35   | GVYYPDKVFR   | 0,568  |
| A03 | HLA-A*03:17 | 41   | KVFRSSVLH    | 0,6944 |
| A03 | HLA-A*03:17 | 89   | GVYFASTEK    | 0,9487 |
| A03 | HLA-A*03:17 | 142  | GVYYHKNNK    | 0,8871 |
| A03 | HLA-A*03:17 | 269  | YLQPRTFLLK   | 0,5577 |
| A03 | HLA-A*03:17 | 302  | TLKSFTVEK    | 0,8988 |
| A03 | HLA-A*03:17 | 311  | GIYQTSNFR    | 0,6304 |
| A03 | HLA-A*03:17 | 349  | SVYAWNRRK    | 0,6333 |
| A03 | HLA-A*03:17 | 367  | VLVNSASFSTFK | 0,5358 |
| A03 | HLA-A*03:17 | 378  | KCYGVSPK     | 0,5631 |
| A03 | HLA-A*03:17 | 408  | RQIAPGQTGK   | 0,8957 |
| A03 | HLA-A*03:17 | 409  | QIAPGQTGK    | 0,6982 |
| A03 | HLA-A*03:17 | 454  | RLFRKSNLK    | 0,9589 |
| A03 | HLA-A*03:17 | 529  | KSTNLVKNK    | 0,5122 |
| A03 | HLA-A*03:17 | 724  | TEILPVSMK    | 0,6838 |
| A03 | HLA-A*03:17 | 786  | KQIYKTPPIK   | 0,8503 |
| A03 | HLA-A*03:17 | 787  | QIYKTPPIK    | 0,8934 |
| A03 | HLA-A*03:17 | 805  | ILPDPSKPSK   | 0,5588 |
| A03 | HLA-A*03:17 | 826  | VTLADAGFIK   | 0,5395 |
| A03 | HLA-A*03:17 | 827  | TLADAGFIK    | 0,7267 |

|     |             |      |              |        |
|-----|-------------|------|--------------|--------|
| A03 | HLA-A*03:17 | 924  | ANQFNSAIGK   | 0,5091 |
| A03 | HLA-A*03:17 | 939  | SSTASALGK    | 0,5175 |
| A03 | HLA-A*03:17 | 1019 | RASANLAATK   | 0,5521 |
| A03 | HLA-A*03:17 | 1020 | ASANLAATK    | 0,7894 |
| A03 | HLA-A*03:17 | 1064 | HVTYVPAQEK   | 0,6951 |
| A03 | HLA-A*03:17 | 1065 | VTYVPAQEK    | 0,9087 |
| A03 | HLA-A*03:17 | 1099 | GTHWFVTQR    | 0,5011 |
| A03 | HLA-A*03:17 | 1196 | SLIDLQELGK   | 0,6419 |
| A03 | HLA-A*03:17 | 1264 | VLKGVKLHY    | 0,6718 |
| A03 | HLA-A*11:01 | 35   | GVYYPDKVFR   | 0,6555 |
| A03 | HLA-A*11:01 | 89   | GVYFASTEK    | 0,9386 |
| A03 | HLA-A*11:01 | 142  | GVYYHKNNK    | 0,7229 |
| A03 | HLA-A*11:01 | 292  | ALDPLSETK    | 0,6795 |
| A03 | HLA-A*11:01 | 302  | TLKSFTVEK    | 0,819  |
| A03 | HLA-A*11:01 | 311  | GIYQTSNFR    | 0,5901 |
| A03 | HLA-A*11:01 | 348  | ASVYAWNRRK   | 0,6551 |
| A03 | HLA-A*11:01 | 349  | SVYAWNRRK    | 0,576  |
| A03 | HLA-A*11:01 | 369  | YNSASFSTFK   | 0,5561 |
| A03 | HLA-A*11:01 | 370  | NSASFSTFK    | 0,8025 |
| A03 | HLA-A*11:01 | 375  | STFKCYGVSPTK | 0,6638 |
| A03 | HLA-A*11:01 | 408  | RQIAPGQTGK   | 0,6249 |
| A03 | HLA-A*11:01 | 409  | QIAPGQTGK    | 0,6748 |
| A03 | HLA-A*11:01 | 454  | RLFRKSNLK    | 0,6772 |
| A03 | HLA-A*11:01 | 550  | GVLTESNKK    | 0,7312 |
| A03 | HLA-A*11:01 | 686  | SVASQSIIAY   | 0,5292 |
| A03 | HLA-A*11:01 | 723  | TTEILPVSMTK  | 0,5964 |
| A03 | HLA-A*11:01 | 724  | TEILPVSMTK   | 0,7926 |
| A03 | HLA-A*11:01 | 725  | EILPVSMTK    | 0,7733 |
| A03 | HLA-A*11:01 | 787  | QIYKTPPIK    | 0,7378 |
| A03 | HLA-A*11:01 | 825  | KVTLADAGFIK  | 0,5709 |
| A03 | HLA-A*11:01 | 826  | VTLADAGFIK   | 0,7264 |
| A03 | HLA-A*11:01 | 827  | TLADAGFIK    | 0,8305 |
| A03 | HLA-A*11:01 | 925  | NQFNSAIGK    | 0,5165 |
| A03 | HLA-A*11:01 | 939  | SSTASALGK    | 0,7797 |
| A03 | HLA-A*11:01 | 956  | AQALNTLVK    | 0,5151 |
| A03 | HLA-A*11:01 | 975  | SVLNDILSR    | 0,8499 |
| A03 | HLA-A*11:01 | 975  | SVLNDILSRLDK | 0,5938 |
| A03 | HLA-A*11:01 | 1019 | RASANLAATK   | 0,5185 |
| A03 | HLA-A*11:01 | 1020 | ASANLAATK    | 0,9119 |
| A03 | HLA-A*11:01 | 1064 | HVTYVPAQEK   | 0,6484 |
| A03 | HLA-A*11:01 | 1065 | VTYVPAQEK    | 0,9153 |
| A03 | HLA-A*11:01 | 1099 | GTHWFVTQR    | 0,7768 |
| A03 | HLA-A*11:01 | 1196 | SLIDLQELGK   | 0,5993 |
| A03 | HLA-A*11:02 | 35   | GVYYPDKVFR   | 0,6555 |
| A03 | HLA-A*11:02 | 89   | GVYFASTEK    | 0,9386 |
| A03 | HLA-A*11:02 | 142  | GVYYHKNNK    | 0,7229 |
| A03 | HLA-A*11:02 | 292  | ALDPLSETK    | 0,6795 |
| A03 | HLA-A*11:02 | 302  | TLKSFTVEK    | 0,819  |
| A03 | HLA-A*11:02 | 311  | GIYQTSNFR    | 0,5901 |
| A03 | HLA-A*11:02 | 348  | ASVYAWNRRK   | 0,6551 |

|     |             |      |              |        |
|-----|-------------|------|--------------|--------|
| A03 | HLA-A*11:02 | 349  | SVYAWNRRKR   | 0,576  |
| A03 | HLA-A*11:02 | 369  | YNSASFSTFK   | 0,5561 |
| A03 | HLA-A*11:02 | 370  | NSASFSTFK    | 0,8025 |
| A03 | HLA-A*11:02 | 375  | STFKCYGVSPTK | 0,6638 |
| A03 | HLA-A*11:02 | 408  | RQIAPGQTGK   | 0,6249 |
| A03 | HLA-A*11:02 | 409  | QIAPGQTGK    | 0,6748 |
| A03 | HLA-A*11:02 | 454  | RLFRKSNLK    | 0,6772 |
| A03 | HLA-A*11:02 | 550  | GVLTESNKK    | 0,7312 |
| A03 | HLA-A*11:02 | 686  | SVASQSIIAY   | 0,5292 |
| A03 | HLA-A*11:02 | 723  | TTEILPVSMTK  | 0,5964 |
| A03 | HLA-A*11:02 | 724  | TEILPVSMTK   | 0,7926 |
| A03 | HLA-A*11:02 | 725  | EILPVSMTK    | 0,7733 |
| A03 | HLA-A*11:02 | 787  | QIYKTPPIK    | 0,7378 |
| A03 | HLA-A*11:02 | 825  | KVTLADAGFIK  | 0,5709 |
| A03 | HLA-A*11:02 | 826  | VTLADAGFIK   | 0,7264 |
| A03 | HLA-A*11:02 | 827  | TLADAGFIK    | 0,8305 |
| A03 | HLA-A*11:02 | 925  | NQFNSAIGK    | 0,5165 |
| A03 | HLA-A*11:02 | 939  | SSTASALGK    | 0,7797 |
| A03 | HLA-A*11:02 | 956  | AQALNTLVK    | 0,5151 |
| A03 | HLA-A*11:02 | 975  | SVLNDILSR    | 0,8499 |
| A03 | HLA-A*11:02 | 975  | SVLNDILSRLDK | 0,5938 |
| A03 | HLA-A*11:02 | 1019 | RASANLAATK   | 0,5185 |
| A03 | HLA-A*11:02 | 1020 | ASANLAATK    | 0,9119 |
| A03 | HLA-A*11:02 | 1064 | HVTYVPAQEK   | 0,6484 |
| A03 | HLA-A*11:02 | 1065 | VTYVPAQEK    | 0,9153 |
| A03 | HLA-A*11:02 | 1099 | GTHWFVTQR    | 0,7768 |
| A03 | HLA-A*11:02 | 1196 | SLIDLQELGK   | 0,5993 |
| A03 | HLA-A*11:03 | 35   | GVYYPDKVFR   | 0,5729 |
| A03 | HLA-A*11:03 | 41   | KVFRSSVLH    | 0,6359 |
| A03 | HLA-A*11:03 | 69   | HVSGTNGTK    | 0,5574 |
| A03 | HLA-A*11:03 | 89   | GVYFASTEK    | 0,9479 |
| A03 | HLA-A*11:03 | 142  | GVYYHKNNK    | 0,8636 |
| A03 | HLA-A*11:03 | 257  | GWTAGAAAYY   | 0,5027 |
| A03 | HLA-A*11:03 | 292  | ALDPLSETK    | 0,6109 |
| A03 | HLA-A*11:03 | 302  | TLKSFTVEK    | 0,8758 |
| A03 | HLA-A*11:03 | 311  | GIYQTSNFR    | 0,6106 |
| A03 | HLA-A*11:03 | 348  | ASVYAWNRRK   | 0,6559 |
| A03 | HLA-A*11:03 | 349  | SVYAWNRRKR   | 0,6192 |
| A03 | HLA-A*11:03 | 369  | YNSASFSTFK   | 0,5161 |
| A03 | HLA-A*11:03 | 370  | NSASFSTFK    | 0,7603 |
| A03 | HLA-A*11:03 | 375  | STFKCYGVSPTK | 0,6584 |
| A03 | HLA-A*11:03 | 408  | RQIAPGQTGK   | 0,8115 |
| A03 | HLA-A*11:03 | 409  | QIAPGQTGK    | 0,7924 |
| A03 | HLA-A*11:03 | 454  | RLFRKSNLK    | 0,839  |
| A03 | HLA-A*11:03 | 529  | KSTNLVKNK    | 0,6205 |
| A03 | HLA-A*11:03 | 550  | GVLTESNKK    | 0,7419 |
| A03 | HLA-A*11:03 | 686  | SVASQSIIAY   | 0,5979 |
| A03 | HLA-A*11:03 | 723  | TTEILPVSMTK  | 0,5555 |
| A03 | HLA-A*11:03 | 724  | TEILPVSMTK   | 0,7868 |
| A03 | HLA-A*11:03 | 725  | EILPVSMTK    | 0,7674 |

|     |             |      |              |        |
|-----|-------------|------|--------------|--------|
| A03 | HLA-A*11:03 | 786  | KQIYKTPPIK   | 0,5919 |
| A03 | HLA-A*11:03 | 787  | QIYKTPPIK    | 0,8358 |
| A03 | HLA-A*11:03 | 825  | KVTLADAGFIK  | 0,5148 |
| A03 | HLA-A*11:03 | 826  | VTLADAGFIK   | 0,6588 |
| A03 | HLA-A*11:03 | 827  | TLADAGFIK    | 0,7979 |
| A03 | HLA-A*11:03 | 924  | ANQFNSAIGK   | 0,5982 |
| A03 | HLA-A*11:03 | 925  | NQFNSAIGK    | 0,5795 |
| A03 | HLA-A*11:03 | 939  | SSTASALGK    | 0,7993 |
| A03 | HLA-A*11:03 | 956  | AQALNTLVK    | 0,5795 |
| A03 | HLA-A*11:03 | 975  | SVLNDILSR    | 0,7656 |
| A03 | HLA-A*11:03 | 975  | SVLNDILSRLDK | 0,5176 |
| A03 | HLA-A*11:03 | 1019 | RASANLAATK   | 0,6171 |
| A03 | HLA-A*11:03 | 1020 | ASANLAATK    | 0,9033 |
| A03 | HLA-A*11:03 | 1064 | HVTYVPAQEK   | 0,7064 |
| A03 | HLA-A*11:03 | 1065 | VTYVPAQEK    | 0,9204 |
| A03 | HLA-A*11:03 | 1099 | GTHWFTQQR    | 0,7038 |
| A03 | HLA-A*11:03 | 1196 | SLIDLQELGK   | 0,6467 |
| A03 | HLA-A*11:04 | 35   | GVYYPDKVFR   | 0,6723 |
| A03 | HLA-A*11:04 | 89   | GVYFASTEK    | 0,9041 |
| A03 | HLA-A*11:04 | 142  | GVYYHKNNK    | 0,7342 |
| A03 | HLA-A*11:04 | 292  | ALDPLSETK    | 0,5968 |
| A03 | HLA-A*11:04 | 302  | TLKSFTVEK    | 0,8186 |
| A03 | HLA-A*11:04 | 311  | GIYQTSNFR    | 0,6771 |
| A03 | HLA-A*11:04 | 319  | RVQPTESIVR   | 0,5363 |
| A03 | HLA-A*11:04 | 348  | ASVYAWNRRK   | 0,5541 |
| A03 | HLA-A*11:04 | 349  | SVYAWNRRK    | 0,646  |
| A03 | HLA-A*11:04 | 370  | NSASFSTFK    | 0,6355 |
| A03 | HLA-A*11:04 | 375  | STFKCYGVSPTK | 0,5031 |
| A03 | HLA-A*11:04 | 408  | RQIAPGQTGK   | 0,7357 |
| A03 | HLA-A*11:04 | 409  | QIAPGQTGK    | 0,6296 |
| A03 | HLA-A*11:04 | 454  | RLFRKSNLK    | 0,8162 |
| A03 | HLA-A*11:04 | 458  | KSNLKPFER    | 0,6282 |
| A03 | HLA-A*11:04 | 529  | KSTNLVKNK    | 0,5664 |
| A03 | HLA-A*11:04 | 550  | GVLTESNKK    | 0,6125 |
| A03 | HLA-A*11:04 | 724  | TEILPVSMTK   | 0,653  |
| A03 | HLA-A*11:04 | 725  | EILPVSMTK    | 0,6293 |
| A03 | HLA-A*11:04 | 786  | KQIYKTPPIK   | 0,5121 |
| A03 | HLA-A*11:04 | 787  | QIYKTPPIK    | 0,7537 |
| A03 | HLA-A*11:04 | 825  | KVTLADAGFIK  | 0,5571 |
| A03 | HLA-A*11:04 | 826  | VTLADAGFIK   | 0,5926 |
| A03 | HLA-A*11:04 | 827  | TLADAGFIK    | 0,7565 |
| A03 | HLA-A*11:04 | 939  | SSTASALGK    | 0,6578 |
| A03 | HLA-A*11:04 | 956  | AQALNTLVK    | 0,5269 |
| A03 | HLA-A*11:04 | 975  | SVLNDILSR    | 0,7843 |
| A03 | HLA-A*11:04 | 1019 | RASANLAATK   | 0,5722 |
| A03 | HLA-A*11:04 | 1020 | ASANLAATK    | 0,8712 |
| A03 | HLA-A*11:04 | 1064 | HVTYVPAQEK   | 0,5792 |
| A03 | HLA-A*11:04 | 1065 | VTYVPAQEK    | 0,8811 |
| A03 | HLA-A*11:04 | 1099 | GTHWFTQQR    | 0,7363 |
| A03 | HLA-A*11:05 | 35   | GVYYPDKVFR   | 0,6555 |

|     |             |      |              |        |
|-----|-------------|------|--------------|--------|
| A03 | HLA-A*11:05 | 89   | GVYFASTEK    | 0,9386 |
| A03 | HLA-A*11:05 | 142  | GVYYHKNNK    | 0,7229 |
| A03 | HLA-A*11:05 | 292  | ALDPLSETK    | 0,6795 |
| A03 | HLA-A*11:05 | 302  | TLKSFTVEK    | 0,819  |
| A03 | HLA-A*11:05 | 311  | GIYQTSNFR    | 0,5901 |
| A03 | HLA-A*11:05 | 348  | ASVYAWNRRK   | 0,6551 |
| A03 | HLA-A*11:05 | 349  | SVYAWNRRKR   | 0,576  |
| A03 | HLA-A*11:05 | 369  | YNSASFSTFK   | 0,5561 |
| A03 | HLA-A*11:05 | 370  | NSASFSTFK    | 0,8025 |
| A03 | HLA-A*11:05 | 375  | STFKCYGVSPTK | 0,6638 |
| A03 | HLA-A*11:05 | 408  | RQIAPGQTGK   | 0,6249 |
| A03 | HLA-A*11:05 | 409  | QIAPGQTGK    | 0,6748 |
| A03 | HLA-A*11:05 | 454  | RLFRKSNLK    | 0,6772 |
| A03 | HLA-A*11:05 | 550  | GVLTESNKK    | 0,7312 |
| A03 | HLA-A*11:05 | 686  | SVASQSIIAY   | 0,5292 |
| A03 | HLA-A*11:05 | 723  | TTEILPVSMTK  | 0,5964 |
| A03 | HLA-A*11:05 | 724  | TEILPVSMTK   | 0,7926 |
| A03 | HLA-A*11:05 | 725  | EILPVSMTK    | 0,7733 |
| A03 | HLA-A*11:05 | 787  | QIYKTPPIK    | 0,7378 |
| A03 | HLA-A*11:05 | 825  | KVTLADAGFIK  | 0,5709 |
| A03 | HLA-A*11:05 | 826  | VTLADAGFIK   | 0,7264 |
| A03 | HLA-A*11:05 | 827  | TLADAGFIK    | 0,8305 |
| A03 | HLA-A*11:05 | 925  | NQFNSAIGK    | 0,5165 |
| A03 | HLA-A*11:05 | 939  | SSTASALGK    | 0,7797 |
| A03 | HLA-A*11:05 | 956  | AQALNTLVK    | 0,5151 |
| A03 | HLA-A*11:05 | 975  | SVLNDILSR    | 0,8499 |
| A03 | HLA-A*11:05 | 975  | SVLNDILSRLDK | 0,5938 |
| A03 | HLA-A*11:05 | 1019 | RASANLAATK   | 0,5185 |
| A03 | HLA-A*11:05 | 1020 | ASANLAATK    | 0,9119 |
| A03 | HLA-A*11:05 | 1064 | HVTYVPAQEK   | 0,6484 |
| A03 | HLA-A*11:05 | 1065 | VTYVPAQEK    | 0,9153 |
| A03 | HLA-A*11:05 | 1099 | GTHWFVTQR    | 0,7768 |
| A03 | HLA-A*11:05 | 1196 | SLIDLQELGK   | 0,5993 |
| A03 | HLA-A*11:07 | 35   | GVYYPDKVFR   | 0,6555 |
| A03 | HLA-A*11:07 | 89   | GVYFASTEK    | 0,9386 |
| A03 | HLA-A*11:07 | 142  | GVYYHKNNK    | 0,7229 |
| A03 | HLA-A*11:07 | 292  | ALDPLSETK    | 0,6795 |
| A03 | HLA-A*11:07 | 302  | TLKSFTVEK    | 0,819  |
| A03 | HLA-A*11:07 | 311  | GIYQTSNFR    | 0,5901 |
| A03 | HLA-A*11:07 | 348  | ASVYAWNRRK   | 0,6551 |
| A03 | HLA-A*11:07 | 349  | SVYAWNRRKR   | 0,576  |
| A03 | HLA-A*11:07 | 369  | YNSASFSTFK   | 0,5561 |
| A03 | HLA-A*11:07 | 370  | NSASFSTFK    | 0,8025 |
| A03 | HLA-A*11:07 | 375  | STFKCYGVSPTK | 0,6638 |
| A03 | HLA-A*11:07 | 408  | RQIAPGQTGK   | 0,6249 |
| A03 | HLA-A*11:07 | 409  | QIAPGQTGK    | 0,6748 |
| A03 | HLA-A*11:07 | 454  | RLFRKSNLK    | 0,6772 |
| A03 | HLA-A*11:07 | 550  | GVLTESNKK    | 0,7312 |
| A03 | HLA-A*11:07 | 686  | SVASQSIIAY   | 0,5292 |
| A03 | HLA-A*11:07 | 723  | TTEILPVSMTK  | 0,5964 |

|     |             |      |              |        |
|-----|-------------|------|--------------|--------|
| A03 | HLA-A*11:07 | 724  | TEILPVSMTK   | 0,7926 |
| A03 | HLA-A*11:07 | 725  | EILPVSMTK    | 0,7733 |
| A03 | HLA-A*11:07 | 787  | QIYKTPPIK    | 0,7378 |
| A03 | HLA-A*11:07 | 825  | KVTLADAGFIK  | 0,5709 |
| A03 | HLA-A*11:07 | 826  | VTLADAGFIK   | 0,7264 |
| A03 | HLA-A*11:07 | 827  | TLADAGFIK    | 0,8305 |
| A03 | HLA-A*11:07 | 925  | NQFNSAIGK    | 0,5165 |
| A03 | HLA-A*11:07 | 939  | SSTASALGK    | 0,7797 |
| A03 | HLA-A*11:07 | 956  | AQALNTLVK    | 0,5151 |
| A03 | HLA-A*11:07 | 975  | SVLNDILSR    | 0,8499 |
| A03 | HLA-A*11:07 | 975  | SVLNDILSRLDK | 0,5938 |
| A03 | HLA-A*11:07 | 1019 | RASANLAATK   | 0,5185 |
| A03 | HLA-A*11:07 | 1020 | ASANLAATK    | 0,9119 |
| A03 | HLA-A*11:07 | 1064 | HVTYVPAQEK   | 0,6484 |
| A03 | HLA-A*11:07 | 1065 | VTYVPAQEK    | 0,9153 |
| A03 | HLA-A*11:07 | 1099 | GTHWFTVQR    | 0,7768 |
| A03 | HLA-A*11:07 | 1196 | SLIDLQELGK   | 0,5993 |
| A03 | HLA-A*11:08 | 30   | NSFTRGVYY    | 0,6147 |
| A03 | HLA-A*11:08 | 41   | KVFRSSVLH    | 0,5716 |
| A03 | HLA-A*11:08 | 69   | HVSGTNGTK    | 0,5285 |
| A03 | HLA-A*11:08 | 89   | GVYFASTEK    | 0,9181 |
| A03 | HLA-A*11:08 | 142  | GVYYHKNNK    | 0,7168 |
| A03 | HLA-A*11:08 | 257  | GWTAGAAAYY   | 0,6585 |
| A03 | HLA-A*11:08 | 258  | WTAGAAAYY    | 0,5874 |
| A03 | HLA-A*11:08 | 261  | GAAAYYVGY    | 0,5405 |
| A03 | HLA-A*11:08 | 292  | ALDPLSETK    | 0,7101 |
| A03 | HLA-A*11:08 | 302  | TLKSFTVEK    | 0,8239 |
| A03 | HLA-A*11:08 | 311  | GIYQTSNFR    | 0,5198 |
| A03 | HLA-A*11:08 | 348  | ASVYAWNRK    | 0,6142 |
| A03 | HLA-A*11:08 | 349  | SVYAWNRKR    | 0,5031 |
| A03 | HLA-A*11:08 | 361  | CVADYSVLY    | 0,5983 |
| A03 | HLA-A*11:08 | 369  | YNSASFSTFK   | 0,5604 |
| A03 | HLA-A*11:08 | 370  | NSASFSTFK    | 0,8068 |
| A03 | HLA-A*11:08 | 375  | STFKCYGVSPTK | 0,5765 |
| A03 | HLA-A*11:08 | 408  | RQIAPGQTGK   | 0,7216 |
| A03 | HLA-A*11:08 | 409  | QIAPGQTGK    | 0,7553 |
| A03 | HLA-A*11:08 | 454  | RLFRKSNLK    | 0,707  |
| A03 | HLA-A*11:08 | 550  | GVLTESNKK    | 0,7019 |
| A03 | HLA-A*11:08 | 604  | TSNQVAVLY    | 0,6574 |
| A03 | HLA-A*11:08 | 686  | SVASQSIIAY   | 0,7162 |
| A03 | HLA-A*11:08 | 723  | TTEILPVSMTK  | 0,519  |
| A03 | HLA-A*11:08 | 724  | TEILPVSMTK   | 0,7064 |
| A03 | HLA-A*11:08 | 725  | EILPVSMTK    | 0,7265 |
| A03 | HLA-A*11:08 | 787  | QIYKTPPIK    | 0,7324 |
| A03 | HLA-A*11:08 | 805  | ILPDPSKPSK   | 0,536  |
| A03 | HLA-A*11:08 | 825  | KVTLADAGFIK  | 0,5029 |
| A03 | HLA-A*11:08 | 826  | VTLADAGFIK   | 0,6667 |
| A03 | HLA-A*11:08 | 827  | TLADAGFIK    | 0,8043 |
| A03 | HLA-A*11:08 | 925  | NQFNSAIGK    | 0,5146 |
| A03 | HLA-A*11:08 | 939  | SSTASALGK    | 0,7826 |

|     |             |      |              |        |
|-----|-------------|------|--------------|--------|
| A03 | HLA-A*11:08 | 956  | AQALNTLVK    | 0,5229 |
| A03 | HLA-A*11:08 | 975  | SVLNDILSR    | 0,7316 |
| A03 | HLA-A*11:08 | 1019 | RASANLAATK   | 0,5652 |
| A03 | HLA-A*11:08 | 1020 | ASANLAATK    | 0,8837 |
| A03 | HLA-A*11:08 | 1064 | HVTYVPAQEK   | 0,6371 |
| A03 | HLA-A*11:08 | 1065 | VTYVPAQEK    | 0,8948 |
| A03 | HLA-A*11:08 | 1099 | GTHWFVTQR    | 0,6403 |
| A03 | HLA-A*11:08 | 1196 | SLIDLQELGK   | 0,5719 |
| A03 | HLA-A*11:09 | 35   | GVYYPDKVFR   | 0,6555 |
| A03 | HLA-A*11:09 | 89   | GVYFASTEK    | 0,9386 |
| A03 | HLA-A*11:09 | 142  | GVYYHKNNK    | 0,7229 |
| A03 | HLA-A*11:09 | 292  | ALDPLSETK    | 0,6795 |
| A03 | HLA-A*11:09 | 302  | TLKSFTVEK    | 0,819  |
| A03 | HLA-A*11:09 | 311  | GIYQTSNFR    | 0,5901 |
| A03 | HLA-A*11:09 | 348  | ASVYAWNRK    | 0,6551 |
| A03 | HLA-A*11:09 | 349  | SVYAWNRKR    | 0,576  |
| A03 | HLA-A*11:09 | 369  | YNSASFSTFK   | 0,5561 |
| A03 | HLA-A*11:09 | 370  | NSASFSTFK    | 0,8025 |
| A03 | HLA-A*11:09 | 375  | STFKCYGVSPTK | 0,6638 |
| A03 | HLA-A*11:09 | 408  | RQIAPGQTGK   | 0,6249 |
| A03 | HLA-A*11:09 | 409  | QIAPGQTGK    | 0,6748 |
| A03 | HLA-A*11:09 | 454  | RLFRKSNLK    | 0,6772 |
| A03 | HLA-A*11:09 | 550  | GVLTESNKK    | 0,7312 |
| A03 | HLA-A*11:09 | 686  | SVASQSIIAY   | 0,5292 |
| A03 | HLA-A*11:09 | 723  | TTEILPVSMTK  | 0,5964 |
| A03 | HLA-A*11:09 | 724  | TEILPVSMTK   | 0,7926 |
| A03 | HLA-A*11:09 | 725  | EILPVSMTK    | 0,7733 |
| A03 | HLA-A*11:09 | 787  | QIYKTPPIK    | 0,7378 |
| A03 | HLA-A*11:09 | 825  | KVTLADAGFIK  | 0,5709 |
| A03 | HLA-A*11:09 | 826  | VTLADAGFIK   | 0,7264 |
| A03 | HLA-A*11:09 | 827  | TLADAGFIK    | 0,8305 |
| A03 | HLA-A*11:09 | 925  | NQFNSAIGK    | 0,5165 |
| A03 | HLA-A*11:09 | 939  | SSTASALGK    | 0,7797 |
| A03 | HLA-A*11:09 | 956  | AQALNTLVK    | 0,5151 |
| A03 | HLA-A*11:09 | 975  | SVLNDILSR    | 0,8499 |
| A03 | HLA-A*11:09 | 975  | SVLNDILSRLDK | 0,5938 |
| A03 | HLA-A*11:09 | 1019 | RASANLAATK   | 0,5185 |
| A03 | HLA-A*11:09 | 1020 | ASANLAATK    | 0,9119 |
| A03 | HLA-A*11:09 | 1064 | HVTYVPAQEK   | 0,6484 |
| A03 | HLA-A*11:09 | 1065 | VTYVPAQEK    | 0,9153 |
| A03 | HLA-A*11:09 | 1099 | GTHWFVTQR    | 0,7768 |
| A03 | HLA-A*11:09 | 1196 | SLIDLQELGK   | 0,5993 |
| A03 | HLA-A*11:10 | 30   | NSFTRGVYY    | 0,5648 |
| A03 | HLA-A*11:10 | 88   | DGVYFASTEK   | 0,5092 |
| A03 | HLA-A*11:10 | 89   | GVYFASTEK    | 0,6152 |
| A03 | HLA-A*11:10 | 258  | WTAGAAAYY    | 0,5276 |
| A03 | HLA-A*11:10 | 361  | CVADYSVLY    | 0,5044 |
| A03 | HLA-A*11:10 | 370  | NSASFSTFK    | 0,7786 |
| A03 | HLA-A*11:10 | 724  | TEILPVSMTK   | 0,5103 |
| A03 | HLA-A*11:10 | 725  | EILPVSMTK    | 0,8498 |

|     |             |      |              |        |
|-----|-------------|------|--------------|--------|
| A03 | HLA-A*11:10 | 817  | FIEDLLFNK    | 0,5044 |
| A03 | HLA-A*11:10 | 827  | TLADAGFIK    | 0,6366 |
| A03 | HLA-A*11:10 | 975  | SVLNDILSR    | 0,6653 |
| A03 | HLA-A*11:10 | 1065 | VTYVPAQEK    | 0,5627 |
| A03 | HLA-A*11:10 | 1173 | NASVVNIQK    | 0,5907 |
| A03 | HLA-A*11:12 | 35   | GVYYPDKVFR   | 0,6555 |
| A03 | HLA-A*11:12 | 89   | GVYFASTEK    | 0,9386 |
| A03 | HLA-A*11:12 | 142  | GVYYHKNNK    | 0,7229 |
| A03 | HLA-A*11:12 | 292  | ALDPLSETK    | 0,6795 |
| A03 | HLA-A*11:12 | 302  | TLKSFTVEK    | 0,819  |
| A03 | HLA-A*11:12 | 311  | GIYQTSNFR    | 0,5901 |
| A03 | HLA-A*11:12 | 348  | ASVYAWNRK    | 0,6551 |
| A03 | HLA-A*11:12 | 349  | SVYAWNRKR    | 0,576  |
| A03 | HLA-A*11:12 | 369  | YNSASFSTFK   | 0,5561 |
| A03 | HLA-A*11:12 | 370  | NSASFSTFK    | 0,8025 |
| A03 | HLA-A*11:12 | 375  | STFKCYGVSPTK | 0,6638 |
| A03 | HLA-A*11:12 | 408  | RQIAPGQTGK   | 0,6249 |
| A03 | HLA-A*11:12 | 409  | QIAPGQTGK    | 0,6748 |
| A03 | HLA-A*11:12 | 454  | RLFRKSNLK    | 0,6772 |
| A03 | HLA-A*11:12 | 550  | GVLTESNKK    | 0,7312 |
| A03 | HLA-A*11:12 | 686  | SVASQSIIAY   | 0,5292 |
| A03 | HLA-A*11:12 | 723  | TTEILPVSMTK  | 0,5964 |
| A03 | HLA-A*11:12 | 724  | TEILPVSMTK   | 0,7926 |
| A03 | HLA-A*11:12 | 725  | EILPVSMTK    | 0,7733 |
| A03 | HLA-A*11:12 | 787  | QIYKTPPIK    | 0,7378 |
| A03 | HLA-A*11:12 | 825  | KVTLADAGFIK  | 0,5709 |
| A03 | HLA-A*11:12 | 826  | VTLADAGFIK   | 0,7264 |
| A03 | HLA-A*11:12 | 827  | TLADAGFIK    | 0,8305 |
| A03 | HLA-A*11:12 | 925  | NQFNSAIGK    | 0,5165 |
| A03 | HLA-A*11:12 | 939  | SSTASALGK    | 0,7797 |
| A03 | HLA-A*11:12 | 956  | AQALNTLVK    | 0,5151 |
| A03 | HLA-A*11:12 | 975  | SVLNDILSR    | 0,8499 |
| A03 | HLA-A*11:12 | 975  | SVLNDILSRLDK | 0,5938 |
| A03 | HLA-A*11:12 | 1019 | RASANLAATK   | 0,5185 |
| A03 | HLA-A*11:12 | 1020 | ASANLAATK    | 0,9119 |
| A03 | HLA-A*11:12 | 1064 | HVTYVPAQEK   | 0,6484 |
| A03 | HLA-A*11:12 | 1065 | VTYVPAQEK    | 0,9153 |
| A03 | HLA-A*11:12 | 1099 | GTHWFVTQR    | 0,7768 |
| A03 | HLA-A*11:12 | 1196 | SLIDLQELGK   | 0,5993 |
| A03 | HLA-A*11:13 | 35   | GVYYPDKVFR   | 0,6555 |
| A03 | HLA-A*11:13 | 89   | GVYFASTEK    | 0,9386 |
| A03 | HLA-A*11:13 | 142  | GVYYHKNNK    | 0,7229 |
| A03 | HLA-A*11:13 | 292  | ALDPLSETK    | 0,6795 |
| A03 | HLA-A*11:13 | 302  | TLKSFTVEK    | 0,819  |
| A03 | HLA-A*11:13 | 311  | GIYQTSNFR    | 0,5901 |
| A03 | HLA-A*11:13 | 348  | ASVYAWNRK    | 0,6551 |
| A03 | HLA-A*11:13 | 349  | SVYAWNRKR    | 0,576  |
| A03 | HLA-A*11:13 | 369  | YNSASFSTFK   | 0,5561 |
| A03 | HLA-A*11:13 | 370  | NSASFSTFK    | 0,8025 |
| A03 | HLA-A*11:13 | 375  | STFKCYGVSPTK | 0,6638 |



|     |             |      |              |        |
|-----|-------------|------|--------------|--------|
| A03 | HLA-A*11:13 | 408  | RQIAPGQTGK   | 0,6249 |
| A03 | HLA-A*11:13 | 409  | QIAPGQTGK    | 0,6748 |
| A03 | HLA-A*11:13 | 454  | RLFRKSNLK    | 0,6772 |
| A03 | HLA-A*11:13 | 550  | GVLTESNKK    | 0,7312 |
| A03 | HLA-A*11:13 | 686  | SVASQSIIAY   | 0,5292 |
| A03 | HLA-A*11:13 | 723  | TTEILPVSMTK  | 0,5964 |
| A03 | HLA-A*11:13 | 724  | TEILPVSMTK   | 0,7926 |
| A03 | HLA-A*11:13 | 725  | EILPVSMTK    | 0,7733 |
| A03 | HLA-A*11:13 | 787  | QIYKTPPIK    | 0,7378 |
| A03 | HLA-A*11:13 | 825  | KVTLADAGFIK  | 0,5709 |
| A03 | HLA-A*11:13 | 826  | VTLADAGFIK   | 0,7264 |
| A03 | HLA-A*11:13 | 827  | TLADAGFIK    | 0,8305 |
| A03 | HLA-A*11:13 | 925  | NQFNSAIGK    | 0,5165 |
| A03 | HLA-A*11:13 | 939  | SSTASALGK    | 0,7797 |
| A03 | HLA-A*11:13 | 956  | AQALNTLVK    | 0,5151 |
| A03 | HLA-A*11:13 | 975  | SVLNDILSR    | 0,8499 |
| A03 | HLA-A*11:13 | 975  | SVLNDILSRLDK | 0,5938 |
| A03 | HLA-A*11:13 | 1019 | RASANLAATK   | 0,5185 |
| A03 | HLA-A*11:13 | 1020 | ASANLAATK    | 0,9119 |
| A03 | HLA-A*11:13 | 1064 | HVTYVPAQEK   | 0,6484 |
| A03 | HLA-A*11:13 | 1065 | VTYVPAQEK    | 0,9153 |
| A03 | HLA-A*11:13 | 1099 | GTHWFVTQR    | 0,7768 |
| A03 | HLA-A*11:13 | 1196 | SLIDLQELGK   | 0,5993 |
| A03 | HLA-A*11:14 | 41   | KVFRSSVLH    | 0,5801 |
| A03 | HLA-A*11:14 | 89   | GVYFASTEK    | 0,9113 |
| A03 | HLA-A*11:14 | 142  | GVYYHKNNK    | 0,7242 |
| A03 | HLA-A*11:14 | 292  | ALDPLSETK    | 0,552  |
| A03 | HLA-A*11:14 | 302  | TLKSFTVEK    | 0,7933 |
| A03 | HLA-A*11:14 | 311  | GIYQTSNFR    | 0,5287 |
| A03 | HLA-A*11:14 | 348  | ASVYAWNRRK   | 0,5921 |
| A03 | HLA-A*11:14 | 349  | SVYAWNRRK    | 0,524  |
| A03 | HLA-A*11:14 | 370  | NSASFSTFK    | 0,7046 |
| A03 | HLA-A*11:14 | 375  | STFKCYGVSPTK | 0,5354 |
| A03 | HLA-A*11:14 | 408  | RQIAPGQTGK   | 0,6772 |
| A03 | HLA-A*11:14 | 409  | QIAPGQTGK    | 0,6664 |
| A03 | HLA-A*11:14 | 454  | RLFRKSNLK    | 0,7323 |
| A03 | HLA-A*11:14 | 550  | GVLTESNKK    | 0,6399 |
| A03 | HLA-A*11:14 | 686  | SVASQSIIAY   | 0,5437 |
| A03 | HLA-A*11:14 | 724  | TEILPVSMTK   | 0,6944 |
| A03 | HLA-A*11:14 | 725  | EILPVSMTK    | 0,6759 |
| A03 | HLA-A*11:14 | 787  | QIYKTPPIK    | 0,728  |
| A03 | HLA-A*11:14 | 826  | VTLADAGFIK   | 0,595  |
| A03 | HLA-A*11:14 | 827  | TLADAGFIK    | 0,7304 |
| A03 | HLA-A*11:14 | 924  | ANQFNSAIGK   | 0,5078 |
| A03 | HLA-A*11:14 | 925  | NQFNSAIGK    | 0,519  |
| A03 | HLA-A*11:14 | 939  | SSTASALGK    | 0,7137 |
| A03 | HLA-A*11:14 | 956  | AQALNTLVK    | 0,5035 |
| A03 | HLA-A*11:14 | 975  | SVLNDILSR    | 0,743  |
| A03 | HLA-A*11:14 | 1019 | RASANLAATK   | 0,5006 |
| A03 | HLA-A*11:14 | 1020 | ASANLAATK    | 0,857  |

|     |             |      |              |        |
|-----|-------------|------|--------------|--------|
| A03 | HLA-A*11:14 | 1064 | HVTYVPAQEK   | 0,5851 |
| A03 | HLA-A*11:14 | 1065 | VTYVPAQEK    | 0,8766 |
| A03 | HLA-A*11:14 | 1099 | GTHWFTQR     | 0,6316 |
| A03 | HLA-A*11:14 | 1196 | SLIDLQELGK   | 0,536  |
| A03 | HLA-A*11:15 | 35   | GVYYPDKVFR   | 0,6555 |
| A03 | HLA-A*11:15 | 89   | GVYFASTEK    | 0,9386 |
| A03 | HLA-A*11:15 | 142  | GVYYHKNNK    | 0,7229 |
| A03 | HLA-A*11:15 | 292  | ALDPLSETK    | 0,6795 |
| A03 | HLA-A*11:15 | 302  | TLKSFTVEK    | 0,819  |
| A03 | HLA-A*11:15 | 311  | GIYQTSNFR    | 0,5901 |
| A03 | HLA-A*11:15 | 348  | ASVYAWNRK    | 0,6551 |
| A03 | HLA-A*11:15 | 349  | SVYAWNRKR    | 0,576  |
| A03 | HLA-A*11:15 | 369  | YNSASFSTFK   | 0,5561 |
| A03 | HLA-A*11:15 | 370  | NSASFSTFK    | 0,8025 |
| A03 | HLA-A*11:15 | 375  | STFKCYGVSPTK | 0,6638 |
| A03 | HLA-A*11:15 | 408  | RQIAPGQTGK   | 0,6249 |
| A03 | HLA-A*11:15 | 409  | QIAPGQTGK    | 0,6748 |
| A03 | HLA-A*11:15 | 454  | RLFRKSNLK    | 0,6772 |
| A03 | HLA-A*11:15 | 550  | GVLTESNKK    | 0,7312 |
| A03 | HLA-A*11:15 | 686  | SVASQSIIAY   | 0,5292 |
| A03 | HLA-A*11:15 | 723  | TTEILPVSMTK  | 0,5964 |
| A03 | HLA-A*11:15 | 724  | TEILPVSMTK   | 0,7926 |
| A03 | HLA-A*11:15 | 725  | EILPVSMTK    | 0,7733 |
| A03 | HLA-A*11:15 | 787  | QIYKTPPIK    | 0,7378 |
| A03 | HLA-A*11:15 | 825  | KVTLADAGFIK  | 0,5709 |
| A03 | HLA-A*11:15 | 826  | VTLADAGFIK   | 0,7264 |
| A03 | HLA-A*11:15 | 827  | TLADAGFIK    | 0,8305 |
| A03 | HLA-A*11:15 | 925  | NQFNSAIGK    | 0,5165 |
| A03 | HLA-A*11:15 | 939  | SSTASALGK    | 0,7797 |
| A03 | HLA-A*11:15 | 956  | AQALNTLVK    | 0,5151 |
| A03 | HLA-A*11:15 | 975  | SVLNDILSR    | 0,8499 |
| A03 | HLA-A*11:15 | 975  | SVLNDILSRLDK | 0,5938 |
| A03 | HLA-A*11:15 | 1019 | RASANLAATK   | 0,5185 |
| A03 | HLA-A*11:15 | 1020 | ASANLAATK    | 0,9119 |
| A03 | HLA-A*11:15 | 1064 | HVTYVPAQEK   | 0,6484 |
| A03 | HLA-A*11:15 | 1065 | VTYVPAQEK    | 0,9153 |
| A03 | HLA-A*11:15 | 1099 | GTHWFTQR     | 0,7768 |
| A03 | HLA-A*11:15 | 1196 | SLIDLQELGK   | 0,5993 |
| A03 | HLA-A*11:16 | 35   | GVYYPDKVFR   | 0,6555 |
| A03 | HLA-A*11:16 | 89   | GVYFASTEK    | 0,9386 |
| A03 | HLA-A*11:16 | 142  | GVYYHKNNK    | 0,7229 |
| A03 | HLA-A*11:16 | 292  | ALDPLSETK    | 0,6795 |
| A03 | HLA-A*11:16 | 302  | TLKSFTVEK    | 0,819  |
| A03 | HLA-A*11:16 | 311  | GIYQTSNFR    | 0,5901 |
| A03 | HLA-A*11:16 | 348  | ASVYAWNRK    | 0,6551 |
| A03 | HLA-A*11:16 | 349  | SVYAWNRKR    | 0,576  |
| A03 | HLA-A*11:16 | 369  | YNSASFSTFK   | 0,5561 |
| A03 | HLA-A*11:16 | 370  | NSASFSTFK    | 0,8025 |
| A03 | HLA-A*11:16 | 375  | STFKCYGVSPTK | 0,6638 |
| A03 | HLA-A*11:16 | 408  | RQIAPGQTGK   | 0,6249 |

|     |             |      |              |        |
|-----|-------------|------|--------------|--------|
| A03 | HLA-A*11:16 | 409  | QIAPGQTGK    | 0,6748 |
| A03 | HLA-A*11:16 | 454  | RLFRKSNLK    | 0,6772 |
| A03 | HLA-A*11:16 | 550  | GVLTESNKK    | 0,7312 |
| A03 | HLA-A*11:16 | 686  | SVASQSIIAY   | 0,5292 |
| A03 | HLA-A*11:16 | 723  | TTEILPVSMTK  | 0,5964 |
| A03 | HLA-A*11:16 | 724  | TEILPVSMTK   | 0,7926 |
| A03 | HLA-A*11:16 | 725  | EILPVSMTK    | 0,7733 |
| A03 | HLA-A*11:16 | 787  | QIYKTPPIK    | 0,7378 |
| A03 | HLA-A*11:16 | 825  | KVTLADAGFIK  | 0,5709 |
| A03 | HLA-A*11:16 | 826  | VTLADAGFIK   | 0,7264 |
| A03 | HLA-A*11:16 | 827  | TLADAGFIK    | 0,8305 |
| A03 | HLA-A*11:16 | 925  | NQFNSAIGK    | 0,5165 |
| A03 | HLA-A*11:16 | 939  | SSTASALGK    | 0,7797 |
| A03 | HLA-A*11:16 | 956  | AQALNTLVK    | 0,5151 |
| A03 | HLA-A*11:16 | 975  | SVLNDILSR    | 0,8499 |
| A03 | HLA-A*11:16 | 975  | SVLNDILSRLDK | 0,5938 |
| A03 | HLA-A*11:16 | 1019 | RASANLAATK   | 0,5185 |
| A03 | HLA-A*11:16 | 1020 | ASANLAATK    | 0,9119 |
| A03 | HLA-A*11:16 | 1064 | HVTYVPAQEK   | 0,6484 |
| A03 | HLA-A*11:16 | 1065 | VTYVPAQEK    | 0,9153 |
| A03 | HLA-A*11:16 | 1099 | GTHWFVTQR    | 0,7768 |
| A03 | HLA-A*11:16 | 1196 | SLIDLQELGK   | 0,5993 |
| A03 | HLA-A*11:20 | 35   | GVYYPDKVFR   | 0,5729 |
| A03 | HLA-A*11:20 | 41   | KVFRSSVLH    | 0,6359 |
| A03 | HLA-A*11:20 | 69   | HVSGTNGTK    | 0,5574 |
| A03 | HLA-A*11:20 | 89   | GVYFASTEK    | 0,9479 |
| A03 | HLA-A*11:20 | 142  | GVYYHKNNK    | 0,8636 |
| A03 | HLA-A*11:20 | 257  | GWTAGAAAYY   | 0,5027 |
| A03 | HLA-A*11:20 | 292  | ALDPLSETK    | 0,6109 |
| A03 | HLA-A*11:20 | 302  | TLKSFTVEK    | 0,8758 |
| A03 | HLA-A*11:20 | 311  | GIYQTSNFR    | 0,6106 |
| A03 | HLA-A*11:20 | 348  | ASVYAWNRK    | 0,6559 |
| A03 | HLA-A*11:20 | 349  | SVYAWNRKR    | 0,6192 |
| A03 | HLA-A*11:20 | 369  | YNSASFSTFK   | 0,5161 |
| A03 | HLA-A*11:20 | 370  | NSASFSTFK    | 0,7603 |
| A03 | HLA-A*11:20 | 375  | STFKCYGVSPTK | 0,6584 |
| A03 | HLA-A*11:20 | 408  | RQIAPGQTGK   | 0,8115 |
| A03 | HLA-A*11:20 | 409  | QIAPGQTGK    | 0,7924 |
| A03 | HLA-A*11:20 | 454  | RLFRKSNLK    | 0,839  |
| A03 | HLA-A*11:20 | 529  | KSTNLVKNK    | 0,6205 |
| A03 | HLA-A*11:20 | 550  | GVLTESNKK    | 0,7419 |
| A03 | HLA-A*11:20 | 686  | SVASQSIIAY   | 0,5979 |
| A03 | HLA-A*11:20 | 723  | TTEILPVSMTK  | 0,5555 |
| A03 | HLA-A*11:20 | 724  | TEILPVSMTK   | 0,7868 |
| A03 | HLA-A*11:20 | 725  | EILPVSMTK    | 0,7674 |
| A03 | HLA-A*11:20 | 786  | KQIYKTPPIK   | 0,5919 |
| A03 | HLA-A*11:20 | 787  | QIYKTPPIK    | 0,8358 |
| A03 | HLA-A*11:20 | 825  | KVTLADAGFIK  | 0,5148 |
| A03 | HLA-A*11:20 | 826  | VTLADAGFIK   | 0,6588 |
| A03 | HLA-A*11:20 | 827  | TLADAGFIK    | 0,7979 |

|     |             |      |              |        |
|-----|-------------|------|--------------|--------|
| A03 | HLA-A*11:20 | 924  | ANQFNSAIGK   | 0,5982 |
| A03 | HLA-A*11:20 | 925  | NQFNSAIGK    | 0,5795 |
| A03 | HLA-A*11:20 | 939  | SSTASALGK    | 0,7993 |
| A03 | HLA-A*11:20 | 956  | AQALNTLVK    | 0,5795 |
| A03 | HLA-A*11:20 | 975  | SVLNDILSR    | 0,7656 |
| A03 | HLA-A*11:20 | 975  | SVLNDILSRLDK | 0,5176 |
| A03 | HLA-A*11:20 | 1019 | RASANLAATK   | 0,6171 |
| A03 | HLA-A*11:20 | 1020 | ASANLAATK    | 0,9033 |
| A03 | HLA-A*11:20 | 1064 | HVTYVPAQEK   | 0,7064 |
| A03 | HLA-A*11:20 | 1065 | VTYVPAQEK    | 0,9204 |
| A03 | HLA-A*11:20 | 1099 | GTHWFTQR     | 0,7038 |
| A03 | HLA-A*11:20 | 1196 | SLIDLQELGK   | 0,6467 |
| A03 | HLA-A*11:23 | 35   | GVYYPDKVFR   | 0,6555 |
| A03 | HLA-A*11:23 | 89   | GVYFASTEK    | 0,9386 |
| A03 | HLA-A*11:23 | 142  | GVYYHKNNK    | 0,7229 |
| A03 | HLA-A*11:23 | 292  | ALDPLSETK    | 0,6795 |
| A03 | HLA-A*11:23 | 302  | TLKSFTVEK    | 0,819  |
| A03 | HLA-A*11:23 | 311  | GIYQTSNFR    | 0,5901 |
| A03 | HLA-A*11:23 | 348  | ASVYAWNRK    | 0,6551 |
| A03 | HLA-A*11:23 | 349  | SVYAWNRKR    | 0,576  |
| A03 | HLA-A*11:23 | 369  | YNSASFSTFK   | 0,5561 |
| A03 | HLA-A*11:23 | 370  | NSASFSTFK    | 0,8025 |
| A03 | HLA-A*11:23 | 375  | STFKCYGVSPTK | 0,6638 |
| A03 | HLA-A*11:23 | 408  | RQIAPGQTGK   | 0,6249 |
| A03 | HLA-A*11:23 | 409  | QIAPGQTGK    | 0,6748 |
| A03 | HLA-A*11:23 | 454  | RLFRKSNLK    | 0,6772 |
| A03 | HLA-A*11:23 | 550  | GVLTESNKK    | 0,7312 |
| A03 | HLA-A*11:23 | 686  | SVASQSIIAY   | 0,5292 |
| A03 | HLA-A*11:23 | 723  | TTEILPVSMTK  | 0,5964 |
| A03 | HLA-A*11:23 | 724  | TEILPVSMTK   | 0,7926 |
| A03 | HLA-A*11:23 | 725  | EILPVSMTK    | 0,7733 |
| A03 | HLA-A*11:23 | 787  | QIYKTPPIK    | 0,7378 |
| A03 | HLA-A*11:23 | 825  | KVTLADAGFIK  | 0,5709 |
| A03 | HLA-A*11:23 | 826  | VTLADAGFIK   | 0,7264 |
| A03 | HLA-A*11:23 | 827  | TLADAGFIK    | 0,8305 |
| A03 | HLA-A*11:23 | 925  | NQFNSAIGK    | 0,5165 |
| A03 | HLA-A*11:23 | 939  | SSTASALGK    | 0,7797 |
| A03 | HLA-A*11:23 | 956  | AQALNTLVK    | 0,5151 |
| A03 | HLA-A*11:23 | 975  | SVLNDILSR    | 0,8499 |
| A03 | HLA-A*11:23 | 975  | SVLNDILSRLDK | 0,5938 |
| A03 | HLA-A*11:23 | 1019 | RASANLAATK   | 0,5185 |
| A03 | HLA-A*11:23 | 1020 | ASANLAATK    | 0,9119 |
| A03 | HLA-A*11:23 | 1064 | HVTYVPAQEK   | 0,6484 |
| A03 | HLA-A*11:23 | 1065 | VTYVPAQEK    | 0,9153 |
| A03 | HLA-A*11:23 | 1099 | GTHWFTQR     | 0,7768 |
| A03 | HLA-A*11:23 | 1196 | SLIDLQELGK   | 0,5993 |
| A03 | HLA-A*31:01 | 34   | RGVYYPDKVFR  | 0,5574 |
| A03 | HLA-A*31:01 | 35   | GVYYPDKVFR   | 0,7294 |
| A03 | HLA-A*31:01 | 36   | VYYPDKVFR    | 0,8085 |
| A03 | HLA-A*31:01 | 150  | KSWMESEFR    | 0,5583 |

|     |             |      |             |        |
|-----|-------------|------|-------------|--------|
| A03 | HLA-A*31:01 | 182  | KQGNFKNLR   | 0,6717 |
| A03 | HLA-A*31:01 | 310  | KGIYQTSNFR  | 0,5075 |
| A03 | HLA-A*31:01 | 311  | GIYQTSNFR   | 0,6612 |
| A03 | HLA-A*31:01 | 319  | RVQPTESIVR  | 0,5738 |
| A03 | HLA-A*31:01 | 346  | RFASVYAWNR  | 0,7025 |
| A03 | HLA-A*31:01 | 349  | SVYAWNRKR   | 0,8646 |
| A03 | HLA-A*31:01 | 395  | VYADSFVIR   | 0,575  |
| A03 | HLA-A*31:01 | 446  | GGNYNYLYR   | 0,5086 |
| A03 | HLA-A*31:01 | 454  | RLFRKSNLK   | 0,5237 |
| A03 | HLA-A*31:01 | 458  | KSNLKPFER   | 0,8687 |
| A03 | HLA-A*31:01 | 558  | KFLPFQQFGR  | 0,6235 |
| A03 | HLA-A*31:01 | 677  | QTNSPRRAR   | 0,6557 |
| A03 | HLA-A*31:01 | 975  | SVLNDILSR   | 0,6352 |
| A03 | HLA-A*31:01 | 1099 | GTHWFVTQR   | 0,837  |
| A03 | HLA-A*31:03 | 34   | RGVYYPDKVFR | 0,6638 |
| A03 | HLA-A*31:03 | 35   | GVYYPDKVFR  | 0,8323 |
| A03 | HLA-A*31:03 | 36   | VYYPDKVFR   | 0,882  |
| A03 | HLA-A*31:03 | 142  | GVYYHKNNK   | 0,5143 |
| A03 | HLA-A*31:03 | 150  | KSWMESEFR   | 0,7064 |
| A03 | HLA-A*31:03 | 182  | KQGNFKNLR   | 0,768  |
| A03 | HLA-A*31:03 | 193  | VFKNIDGYFK  | 0,6092 |
| A03 | HLA-A*31:03 | 237  | RFQTLALHR   | 0,5604 |
| A03 | HLA-A*31:03 | 264  | AYYVGYLQPR  | 0,5113 |
| A03 | HLA-A*31:03 | 302  | TLKSFTVEK   | 0,6023 |
| A03 | HLA-A*31:03 | 310  | KGIYQTSNFR  | 0,6    |
| A03 | HLA-A*31:03 | 311  | GIYQTSNFR   | 0,7783 |
| A03 | HLA-A*31:03 | 319  | RVQPTESIVR  | 0,6913 |
| A03 | HLA-A*31:03 | 346  | RFASVYAWNR  | 0,73   |
| A03 | HLA-A*31:03 | 348  | ASVYAWNRKR  | 0,5374 |
| A03 | HLA-A*31:03 | 349  | SVYAWNRKR   | 0,8673 |
| A03 | HLA-A*31:03 | 394  | NVYADSFVIR  | 0,5006 |
| A03 | HLA-A*31:03 | 395  | VYADSFVIR   | 0,708  |
| A03 | HLA-A*31:03 | 446  | GGNYNYLYR   | 0,7092 |
| A03 | HLA-A*31:03 | 449  | YNYLYRLF    | 0,5488 |
| A03 | HLA-A*31:03 | 454  | RLFRKSNLK   | 0,6239 |
| A03 | HLA-A*31:03 | 457  | RKSNLKPFER  | 0,5092 |
| A03 | HLA-A*31:03 | 458  | KSNLKPFER   | 0,9139 |
| A03 | HLA-A*31:03 | 558  | KFLPFQQFGR  | 0,7268 |
| A03 | HLA-A*31:03 | 637  | STGSNVFQTR  | 0,6297 |
| A03 | HLA-A*31:03 | 638  | TGSNVFQTR   | 0,5408 |
| A03 | HLA-A*31:03 | 677  | QTNSPRRAR   | 0,6697 |
| A03 | HLA-A*31:03 | 757  | GSFCTQLNR   | 0,5163 |
| A03 | HLA-A*31:03 | 975  | SVLNDILSR   | 0,8099 |
| A03 | HLA-A*31:03 | 991  | VQIDRLITGR  | 0,5083 |
| A03 | HLA-A*31:03 | 1099 | GTHWFVTQR   | 0,8669 |
| A03 | HLA-A*31:04 | 34   | RGVYYPDKVFR | 0,6638 |
| A03 | HLA-A*31:04 | 35   | GVYYPDKVFR  | 0,8323 |
| A03 | HLA-A*31:04 | 36   | VYYPDKVFR   | 0,882  |
| A03 | HLA-A*31:04 | 142  | GVYYHKNNK   | 0,5143 |
| A03 | HLA-A*31:04 | 150  | KSWMESEFR   | 0,7064 |

|     |             |      |             |        |
|-----|-------------|------|-------------|--------|
| A03 | HLA-A*31:04 | 182  | KQGNFKNLR   | 0,768  |
| A03 | HLA-A*31:04 | 193  | VFKNIDGYFK  | 0,6092 |
| A03 | HLA-A*31:04 | 237  | RFQTLALHR   | 0,5604 |
| A03 | HLA-A*31:04 | 264  | AYYVGYLQPR  | 0,5113 |
| A03 | HLA-A*31:04 | 302  | TLKSFTVEK   | 0,6023 |
| A03 | HLA-A*31:04 | 310  | KGIYQTSNFR  | 0,6    |
| A03 | HLA-A*31:04 | 311  | GIYQTSNFR   | 0,7783 |
| A03 | HLA-A*31:04 | 319  | RVQPTESIVR  | 0,6913 |
| A03 | HLA-A*31:04 | 346  | RFASVYAWNRR | 0,73   |
| A03 | HLA-A*31:04 | 348  | ASVYAWNRRKR | 0,5374 |
| A03 | HLA-A*31:04 | 349  | SVYAWNRRKR  | 0,8673 |
| A03 | HLA-A*31:04 | 394  | NVYADSFVIR  | 0,5006 |
| A03 | HLA-A*31:04 | 395  | VYADSFVIR   | 0,708  |
| A03 | HLA-A*31:04 | 446  | GGNYNYLYR   | 0,7092 |
| A03 | HLA-A*31:04 | 449  | YNYLYRLFR   | 0,5488 |
| A03 | HLA-A*31:04 | 454  | RLFRKSNLK   | 0,6239 |
| A03 | HLA-A*31:04 | 457  | RKSNLKPFR   | 0,5092 |
| A03 | HLA-A*31:04 | 458  | KSNLKPFR    | 0,9139 |
| A03 | HLA-A*31:04 | 558  | KFLPFQFGR   | 0,7268 |
| A03 | HLA-A*31:04 | 637  | STGSNVFQTR  | 0,6297 |
| A03 | HLA-A*31:04 | 638  | TGSNVFQTR   | 0,5408 |
| A03 | HLA-A*31:04 | 677  | QTNSPRRAR   | 0,6697 |
| A03 | HLA-A*31:04 | 757  | GSFCTQLNR   | 0,5163 |
| A03 | HLA-A*31:04 | 975  | SVLNDILSR   | 0,8099 |
| A03 | HLA-A*31:04 | 991  | VQIDRLITGR  | 0,5083 |
| A03 | HLA-A*31:04 | 1099 | GTHWFVTQR   | 0,8669 |
| A03 | HLA-A*31:05 | 35   | GVYYPDKVFR  | 0,5445 |
| A03 | HLA-A*31:05 | 36   | VYYPDKVFR   | 0,7165 |
| A03 | HLA-A*31:05 | 346  | RFASVYAWNRR | 0,6108 |
| A03 | HLA-A*31:05 | 349  | SVYAWNRRKR  | 0,6829 |
| A03 | HLA-A*31:05 | 395  | VYADSFVIR   | 0,5499 |
| A03 | HLA-A*31:05 | 458  | KSNLKPFR    | 0,6747 |
| A03 | HLA-A*31:05 | 1099 | GTHWFVTQR   | 0,6122 |
| A03 | HLA-A*31:06 | 34   | RGVYYPDKVFR | 0,5993 |
| A03 | HLA-A*31:06 | 35   | GVYYPDKVFR  | 0,8058 |
| A03 | HLA-A*31:06 | 36   | VYYPDKVFR   | 0,8626 |
| A03 | HLA-A*31:06 | 150  | KSWMESEFR   | 0,6719 |
| A03 | HLA-A*31:06 | 182  | KQGNFKNLR   | 0,7159 |
| A03 | HLA-A*31:06 | 193  | VFKNIDGYFK  | 0,5689 |
| A03 | HLA-A*31:06 | 237  | RFQTLALHR   | 0,5435 |
| A03 | HLA-A*31:06 | 302  | TLKSFTVEK   | 0,5191 |
| A03 | HLA-A*31:06 | 310  | KGIYQTSNFR  | 0,5598 |
| A03 | HLA-A*31:06 | 311  | GIYQTSNFR   | 0,7562 |
| A03 | HLA-A*31:06 | 319  | RVQPTESIVR  | 0,6572 |
| A03 | HLA-A*31:06 | 346  | RFASVYAWNRR | 0,7268 |
| A03 | HLA-A*31:06 | 349  | SVYAWNRRKR  | 0,8534 |
| A03 | HLA-A*31:06 | 395  | VYADSFVIR   | 0,6684 |
| A03 | HLA-A*31:06 | 446  | GGNYNYLYR   | 0,647  |
| A03 | HLA-A*31:06 | 449  | YNYLYRLFR   | 0,5126 |
| A03 | HLA-A*31:06 | 454  | RLFRKSNLK   | 0,5816 |

|     |             |      |             |        |
|-----|-------------|------|-------------|--------|
| A03 | HLA-A*31:06 | 458  | KSNLKPFER   | 0,8983 |
| A03 | HLA-A*31:06 | 558  | KFLPFQQFGR  | 0,6977 |
| A03 | HLA-A*31:06 | 637  | STGSNVFQTR  | 0,5673 |
| A03 | HLA-A*31:06 | 677  | QTNSPRRAR   | 0,5945 |
| A03 | HLA-A*31:06 | 975  | SVLNDILSR   | 0,7759 |
| A03 | HLA-A*31:06 | 1099 | GTHWFVTQR   | 0,856  |
| A03 | HLA-A*31:09 | 34   | RGVYYPDKVFR | 0,5141 |
| A03 | HLA-A*31:09 | 35   | GVYYPDKVFR  | 0,663  |
| A03 | HLA-A*31:09 | 36   | VYYPDKVFR   | 0,7682 |
| A03 | HLA-A*31:09 | 150  | KSWMESEFR   | 0,517  |
| A03 | HLA-A*31:09 | 182  | KQGNFKNLR   | 0,6571 |
| A03 | HLA-A*31:09 | 311  | GIYQTSNFR   | 0,5434 |
| A03 | HLA-A*31:09 | 346  | RFASVYAWNR  | 0,6162 |
| A03 | HLA-A*31:09 | 349  | SVYAWNRKR   | 0,8004 |
| A03 | HLA-A*31:09 | 395  | VYADSFVIR   | 0,5259 |
| A03 | HLA-A*31:09 | 458  | KSNLKPFER   | 0,8223 |
| A03 | HLA-A*31:09 | 558  | KFLPFQQFGR  | 0,5629 |
| A03 | HLA-A*31:09 | 677  | QTNSPRRAR   | 0,5307 |
| A03 | HLA-A*31:09 | 975  | SVLNDILSR   | 0,5479 |
| A03 | HLA-A*31:09 | 1099 | GTHWFVTQR   | 0,7562 |
| A03 | HLA-A*31:11 | 34   | RGVYYPDKVFR | 0,5574 |
| A03 | HLA-A*31:11 | 35   | GVYYPDKVFR  | 0,7294 |
| A03 | HLA-A*31:11 | 36   | VYYPDKVFR   | 0,8085 |
| A03 | HLA-A*31:11 | 150  | KSWMESEFR   | 0,5583 |
| A03 | HLA-A*31:11 | 182  | KQGNFKNLR   | 0,6717 |
| A03 | HLA-A*31:11 | 310  | KGIYQTSNFR  | 0,5075 |
| A03 | HLA-A*31:11 | 311  | GIYQTSNFR   | 0,6612 |
| A03 | HLA-A*31:11 | 319  | RVQPTESIVR  | 0,5738 |
| A03 | HLA-A*31:11 | 346  | RFASVYAWNR  | 0,7025 |
| A03 | HLA-A*31:11 | 349  | SVYAWNRKR   | 0,8646 |
| A03 | HLA-A*31:11 | 395  | VYADSFVIR   | 0,575  |
| A03 | HLA-A*31:11 | 446  | GGNYNYLYR   | 0,5086 |
| A03 | HLA-A*31:11 | 454  | RLFRKSNLK   | 0,5237 |
| A03 | HLA-A*31:11 | 458  | KSNLKPFER   | 0,8687 |
| A03 | HLA-A*31:11 | 558  | KFLPFQQFGR  | 0,6235 |
| A03 | HLA-A*31:11 | 677  | QTNSPRRAR   | 0,6557 |
| A03 | HLA-A*31:11 | 975  | SVLNDILSR   | 0,6352 |
| A03 | HLA-A*31:11 | 1099 | GTHWFVTQR   | 0,837  |
| A03 | HLA-A*33:01 | 36   | VYYPDKVFR   | 0,6674 |
| A03 | HLA-A*33:01 | 265  | YYVGYLQPR   | 0,6111 |
| A03 | HLA-A*33:01 | 349  | SVYAWNRKR   | 0,5816 |
| A03 | HLA-A*33:01 | 394  | NVYADSFVIR  | 0,575  |
| A03 | HLA-A*33:01 | 395  | VYADSFVIR   | 0,5728 |
| A03 | HLA-A*33:01 | 448  | NYNYLYRLFR  | 0,5281 |
| A03 | HLA-A*33:04 | 36   | VYYPDKVFR   | 0,6674 |
| A03 | HLA-A*33:04 | 265  | YYVGYLQPR   | 0,6111 |
| A03 | HLA-A*33:04 | 349  | SVYAWNRKR   | 0,5816 |
| A03 | HLA-A*33:04 | 394  | NVYADSFVIR  | 0,575  |
| A03 | HLA-A*33:04 | 395  | VYADSFVIR   | 0,5728 |
| A03 | HLA-A*33:04 | 448  | NYNYLYRLFR  | 0,5281 |

|     |             |      |            |        |
|-----|-------------|------|------------|--------|
| A03 | HLA-A*33:05 | 36   | VYYPDKVFR  | 0,6674 |
| A03 | HLA-A*33:05 | 265  | YYVGYLQPR  | 0,6111 |
| A03 | HLA-A*33:05 | 349  | SVYAWNRRKR | 0,5816 |
| A03 | HLA-A*33:05 | 394  | NVYADSFVIR | 0,575  |
| A03 | HLA-A*33:05 | 395  | VYADSFVIR  | 0,5728 |
| A03 | HLA-A*33:05 | 448  | NYNLYRLFR  | 0,5281 |
| A03 | HLA-A*33:06 | 36   | VYYPDKVFR  | 0,6561 |
| A03 | HLA-A*33:06 | 265  | YYVGYLQPR  | 0,5103 |
| A03 | HLA-A*33:06 | 349  | SVYAWNRRKR | 0,7608 |
| A03 | HLA-A*33:06 | 394  | NVYADSFVIR | 0,5705 |
| A03 | HLA-A*33:06 | 395  | VYADSFVIR  | 0,5307 |
| A03 | HLA-A*33:06 | 677  | QTNSPRRAR  | 0,5806 |
| A03 | HLA-A*33:06 | 975  | SVLNDILSR  | 0,5342 |
| A03 | HLA-A*33:06 | 1099 | GTHWFVTQR  | 0,5592 |
| A03 | HLA-A*33:07 | 36   | VYYPDKVFR  | 0,6674 |
| A03 | HLA-A*33:07 | 265  | YYVGYLQPR  | 0,6111 |
| A03 | HLA-A*33:07 | 349  | SVYAWNRRKR | 0,5816 |
| A03 | HLA-A*33:07 | 394  | NVYADSFVIR | 0,575  |
| A03 | HLA-A*33:07 | 395  | VYADSFVIR  | 0,5728 |
| A03 | HLA-A*33:07 | 448  | NYNLYRLFR  | 0,5281 |
| A03 | HLA-A*34:02 | 30   | NSFTRGVYY  | 0,7033 |
| A03 | HLA-A*34:02 | 35   | GVYYPDKVFR | 0,5826 |
| A03 | HLA-A*34:02 | 69   | HVSGTNGTK  | 0,6254 |
| A03 | HLA-A*34:02 | 88   | DGVYFASTEK | 0,5696 |
| A03 | HLA-A*34:02 | 89   | GVYFASTEK  | 0,81   |
| A03 | HLA-A*34:02 | 142  | GVYYHKNNK  | 0,7107 |
| A03 | HLA-A*34:02 | 192  | FVFKNIDGY  | 0,5463 |
| A03 | HLA-A*34:02 | 198  | DGYFKIYSK  | 0,5064 |
| A03 | HLA-A*34:02 | 258  | WTAGAAAYY  | 0,585  |
| A03 | HLA-A*34:02 | 302  | TLKSFTVEK  | 0,7513 |
| A03 | HLA-A*34:02 | 311  | GIYQTSNFR  | 0,5989 |
| A03 | HLA-A*34:02 | 349  | SVYAWNRRKR | 0,7569 |
| A03 | HLA-A*34:02 | 370  | NSASFSTFK  | 0,7929 |
| A03 | HLA-A*34:02 | 394  | NVYADSFVIR | 0,553  |
| A03 | HLA-A*34:02 | 409  | QIAPGQTGK  | 0,7709 |
| A03 | HLA-A*34:02 | 724  | TEILPVSMTK | 0,6467 |
| A03 | HLA-A*34:02 | 725  | EILPVSMTK  | 0,8798 |
| A03 | HLA-A*34:02 | 782  | FAQVKQIYK  | 0,569  |
| A03 | HLA-A*34:02 | 787  | QIYKTPPIK  | 0,744  |
| A03 | HLA-A*34:02 | 827  | TLADAGFIK  | 0,6884 |
| A03 | HLA-A*34:02 | 975  | SVLNDILSR  | 0,7688 |
| A03 | HLA-A*34:02 | 1020 | ASANLAATK  | 0,5816 |
| A03 | HLA-A*34:02 | 1064 | HVTYVPAQEK | 0,7046 |
| A03 | HLA-A*34:02 | 1065 | VTYVPAQEK  | 0,8154 |
| A03 | HLA-A*34:02 | 1099 | GTHWFVTQR  | 0,5926 |
| A03 | HLA-A*34:02 | 1173 | NASVVNIQK  | 0,5921 |
| A03 | HLA-A*34:03 | 30   | NSFTRGVYY  | 0,7033 |
| A03 | HLA-A*34:03 | 35   | GVYYPDKVFR | 0,5826 |
| A03 | HLA-A*34:03 | 69   | HVSGTNGTK  | 0,6254 |
| A03 | HLA-A*34:03 | 88   | DGVYFASTEK | 0,5696 |



|     |             |      |            |        |
|-----|-------------|------|------------|--------|
| A03 | HLA-A*34:03 | 89   | GVYFASTEK  | 0,81   |
| A03 | HLA-A*34:03 | 142  | GVYYHKNNK  | 0,7107 |
| A03 | HLA-A*34:03 | 192  | FVFKNIDGY  | 0,5463 |
| A03 | HLA-A*34:03 | 198  | DGYFKIYSK  | 0,5064 |
| A03 | HLA-A*34:03 | 258  | WTAGAAAYY  | 0,585  |
| A03 | HLA-A*34:03 | 302  | TLKSFTVEK  | 0,7513 |
| A03 | HLA-A*34:03 | 311  | GIYQTSNFR  | 0,5989 |
| A03 | HLA-A*34:03 | 349  | SVYAWNRKR  | 0,7569 |
| A03 | HLA-A*34:03 | 370  | NSASFSTFK  | 0,7929 |
| A03 | HLA-A*34:03 | 394  | NVYADSFVIR | 0,553  |
| A03 | HLA-A*34:03 | 409  | QIAPGQTGK  | 0,7709 |
| A03 | HLA-A*34:03 | 724  | TEILPVSMTK | 0,6467 |
| A03 | HLA-A*34:03 | 725  | EILPVSMTK  | 0,8798 |
| A03 | HLA-A*34:03 | 782  | FAQVKQIYK  | 0,569  |
| A03 | HLA-A*34:03 | 787  | QIYKTPPIK  | 0,744  |
| A03 | HLA-A*34:03 | 827  | TLADAGFIK  | 0,6884 |
| A03 | HLA-A*34:03 | 975  | SVLNDILSR  | 0,7688 |
| A03 | HLA-A*34:03 | 1020 | ASANLAATK  | 0,5816 |
| A03 | HLA-A*34:03 | 1064 | HVTYVPAQEK | 0,7046 |
| A03 | HLA-A*34:03 | 1065 | VTYVPAQEK  | 0,8154 |
| A03 | HLA-A*34:03 | 1099 | GTHWFVTQR  | 0,5926 |
| A03 | HLA-A*34:03 | 1173 | NASVVNIQK  | 0,5921 |
| A03 | HLA-A*34:04 | 30   | NSFTRGVYY  | 0,7033 |
| A03 | HLA-A*34:04 | 35   | GVYYPDKVFR | 0,5826 |
| A03 | HLA-A*34:04 | 69   | HVSGTNGTK  | 0,6254 |
| A03 | HLA-A*34:04 | 88   | DGVYFASTEK | 0,5696 |
| A03 | HLA-A*34:04 | 89   | GVYFASTEK  | 0,81   |
| A03 | HLA-A*34:04 | 142  | GVYYHKNNK  | 0,7107 |
| A03 | HLA-A*34:04 | 192  | FVFKNIDGY  | 0,5463 |
| A03 | HLA-A*34:04 | 198  | DGYFKIYSK  | 0,5064 |
| A03 | HLA-A*34:04 | 258  | WTAGAAAYY  | 0,585  |
| A03 | HLA-A*34:04 | 302  | TLKSFTVEK  | 0,7513 |
| A03 | HLA-A*34:04 | 311  | GIYQTSNFR  | 0,5989 |
| A03 | HLA-A*34:04 | 349  | SVYAWNRKR  | 0,7569 |
| A03 | HLA-A*34:04 | 370  | NSASFSTFK  | 0,7929 |
| A03 | HLA-A*34:04 | 394  | NVYADSFVIR | 0,553  |
| A03 | HLA-A*34:04 | 409  | QIAPGQTGK  | 0,7709 |
| A03 | HLA-A*34:04 | 724  | TEILPVSMTK | 0,6467 |
| A03 | HLA-A*34:04 | 725  | EILPVSMTK  | 0,8798 |
| A03 | HLA-A*34:04 | 782  | FAQVKQIYK  | 0,569  |
| A03 | HLA-A*34:04 | 787  | QIYKTPPIK  | 0,744  |
| A03 | HLA-A*34:04 | 827  | TLADAGFIK  | 0,6884 |
| A03 | HLA-A*34:04 | 975  | SVLNDILSR  | 0,7688 |
| A03 | HLA-A*34:04 | 1020 | ASANLAATK  | 0,5816 |
| A03 | HLA-A*34:04 | 1064 | HVTYVPAQEK | 0,7046 |
| A03 | HLA-A*34:04 | 1065 | VTYVPAQEK  | 0,8154 |
| A03 | HLA-A*34:04 | 1099 | GTHWFVTQR  | 0,5926 |
| A03 | HLA-A*34:04 | 1173 | NASVVNIQK  | 0,5921 |
| A03 | HLA-A*34:06 | 30   | NSFTRGVYY  | 0,6353 |
| A03 | HLA-A*34:06 | 192  | FVFKNIDGY  | 0,6689 |

|     |             |     |             |        |
|-----|-------------|-----|-------------|--------|
| A03 | HLA-A*34:06 | 258 | WTAGAAAYY   | 0,787  |
| A03 | HLA-A*34:06 | 349 | SVYAWNRKR   | 0,6008 |
| A03 | HLA-A*34:06 | 360 | NCVADYSVLY  | 0,5204 |
| A03 | HLA-A*34:06 | 361 | CVADYSVLY   | 0,6106 |
| A03 | HLA-A*34:06 | 604 | TSNQVAVLY   | 0,5152 |
| A03 | HLA-A*34:06 | 725 | EILPVSMTK   | 0,7361 |
| A03 | HLA-A*34:06 | 865 | LTDEMIAQY   | 0,516  |
| A03 | HLA-A*34:06 | 975 | SVLNDILSR   | 0,591  |
| A03 | HLA-A*66:01 | 192 | FVFKNIDGY   | 0,6341 |
| A03 | HLA-A*66:01 | 258 | WTAGAAAYY   | 0,7115 |
| A03 | HLA-A*66:01 | 725 | EILPVSMTK   | 0,6045 |
| A03 | HLA-A*66:02 | 69  | HVSGTNGTK   | 0,5701 |
| A03 | HLA-A*66:02 | 192 | FVFKNIDGY   | 0,6529 |
| A03 | HLA-A*66:02 | 258 | WTAGAAAYY   | 0,7098 |
| A03 | HLA-A*66:02 | 349 | SVYAWNRKR   | 0,538  |
| A03 | HLA-A*66:02 | 725 | EILPVSMTK   | 0,694  |
| A03 | HLA-A*66:03 | 192 | FVFKNIDGY   | 0,6992 |
| A03 | HLA-A*66:03 | 258 | WTAGAAAYY   | 0,7192 |
| A03 | HLA-A*66:03 | 349 | SVYAWNRKR   | 0,5229 |
| A03 | HLA-A*66:04 | 192 | FVFKNIDGY   | 0,5137 |
| A03 | HLA-A*66:04 | 258 | WTAGAAAYY   | 0,5766 |
| A03 | HLA-A*66:04 | 725 | EILPVSMTK   | 0,603  |
| A03 | HLA-A*68:01 | 30  | NSFTRGVYY   | 0,668  |
| A03 | HLA-A*68:01 | 35  | GVYYPDKVFR  | 0,7011 |
| A03 | HLA-A*68:01 | 69  | HVSGTNGTK   | 0,6905 |
| A03 | HLA-A*68:01 | 69  | HVSGTNGTKR  | 0,6265 |
| A03 | HLA-A*68:01 | 88  | DGVYFASTEK  | 0,6542 |
| A03 | HLA-A*68:01 | 89  | GVYFASTEK   | 0,6612 |
| A03 | HLA-A*68:01 | 94  | STEKSNIIIR  | 0,5226 |
| A03 | HLA-A*68:01 | 192 | FVFKNIDGY   | 0,6109 |
| A03 | HLA-A*68:01 | 198 | DGYFKIYSK   | 0,5463 |
| A03 | HLA-A*68:01 | 228 | DLPIGINITR  | 0,6101 |
| A03 | HLA-A*68:01 | 258 | WTAGAAAYY   | 0,739  |
| A03 | HLA-A*68:01 | 302 | TLKSFTVEK   | 0,5381 |
| A03 | HLA-A*68:01 | 311 | GIYQTSNFR   | 0,6323 |
| A03 | HLA-A*68:01 | 347 | FASVYAWNR   | 0,6502 |
| A03 | HLA-A*68:01 | 349 | SVYAWNRKR   | 0,7833 |
| A03 | HLA-A*68:01 | 361 | CVADYSVLY   | 0,538  |
| A03 | HLA-A*68:01 | 369 | YNSASFSTFK  | 0,5211 |
| A03 | HLA-A*68:01 | 370 | NSASFSTFK   | 0,8693 |
| A03 | HLA-A*68:01 | 394 | NVYADSFVIR  | 0,8218 |
| A03 | HLA-A*68:01 | 400 | FVIRGDEVIR  | 0,7176 |
| A03 | HLA-A*68:01 | 409 | QIAPGQTGK   | 0,6056 |
| A03 | HLA-A*68:01 | 501 | NGVGYQPYPYR | 0,5133 |
| A03 | HLA-A*68:01 | 568 | DIADTTDAVR  | 0,5526 |
| A03 | HLA-A*68:01 | 604 | TSNQVAVLY   | 0,5237 |
| A03 | HLA-A*68:01 | 637 | STGSNVFQTR  | 0,6834 |
| A03 | HLA-A*68:01 | 677 | QTNSPRRAR   | 0,5628 |
| A03 | HLA-A*68:01 | 725 | EILPVSMTK   | 0,8883 |
| A03 | HLA-A*68:01 | 777 | NTQEVFAQVK  | 0,5821 |

|     |             |      |            |        |
|-----|-------------|------|------------|--------|
| A03 | HLA-A*68:01 | 782  | FAQVKQIYK  | 0,557  |
| A03 | HLA-A*68:01 | 817  | FIEDLLFNK  | 0,5167 |
| A03 | HLA-A*68:01 | 827  | TLADAGFIK  | 0,6674 |
| A03 | HLA-A*68:01 | 975  | SVLNDILSR  | 0,7755 |
| A03 | HLA-A*68:01 | 1020 | ASANLAATK  | 0,5422 |
| A03 | HLA-A*68:01 | 1064 | HVTYVPAQEK | 0,6592 |
| A03 | HLA-A*68:01 | 1065 | VTYVPAQEK  | 0,6604 |
| A03 | HLA-A*68:01 | 1099 | GTHWFVTQR  | 0,7781 |
| A03 | HLA-A*68:01 | 1173 | NASVVNIQK  | 0,8236 |
| A03 | HLA-A*68:03 | 30   | NSFTRGVYY  | 0,52   |
| A03 | HLA-A*68:03 | 35   | GVYYPDKVFR | 0,583  |
| A03 | HLA-A*68:03 | 69   | HVSGTNGTKR | 0,5195 |
| A03 | HLA-A*68:03 | 192  | FVFKNIDGY  | 0,5247 |
| A03 | HLA-A*68:03 | 228  | DLPIGINITR | 0,5626 |
| A03 | HLA-A*68:03 | 258  | WTAGAAAYY  | 0,6587 |
| A03 | HLA-A*68:03 | 311  | GIYQTSNFR  | 0,5487 |
| A03 | HLA-A*68:03 | 347  | FASVYAWNR  | 0,5769 |
| A03 | HLA-A*68:03 | 349  | SVYAWNRKR  | 0,6915 |
| A03 | HLA-A*68:03 | 370  | NSASFSTFK  | 0,6811 |
| A03 | HLA-A*68:03 | 394  | NVYADSFVIR | 0,7431 |
| A03 | HLA-A*68:03 | 400  | FVIRGDEVR  | 0,6382 |
| A03 | HLA-A*68:03 | 637  | STGSNVFQTR | 0,5981 |
| A03 | HLA-A*68:03 | 725  | EILPVSMTK  | 0,7062 |
| A03 | HLA-A*68:03 | 975  | SVLNDILSR  | 0,7019 |
| A03 | HLA-A*68:03 | 1099 | GTHWFVTQR  | 0,6828 |
| A03 | HLA-A*68:03 | 1173 | NASVVNIQK  | 0,5167 |
| A03 | HLA-A*68:04 | 35   | GVYYPDKVFR | 0,5995 |
| A03 | HLA-A*68:04 | 69   | HVSGTNGTKR | 0,5678 |
| A03 | HLA-A*68:04 | 228  | DLPIGINITR | 0,5843 |
| A03 | HLA-A*68:04 | 258  | WTAGAAAYY  | 0,5018 |
| A03 | HLA-A*68:04 | 311  | GIYQTSNFR  | 0,5866 |
| A03 | HLA-A*68:04 | 347  | FASVYAWNR  | 0,6029 |
| A03 | HLA-A*68:04 | 349  | SVYAWNRKR  | 0,7626 |
| A03 | HLA-A*68:04 | 370  | NSASFSTFK  | 0,6296 |
| A03 | HLA-A*68:04 | 394  | NVYADSFVIR | 0,7377 |
| A03 | HLA-A*68:04 | 400  | FVIRGDEVR  | 0,6688 |
| A03 | HLA-A*68:04 | 568  | DIADTTDAVR | 0,5213 |
| A03 | HLA-A*68:04 | 637  | STGSNVFQTR | 0,6194 |
| A03 | HLA-A*68:04 | 677  | QTNSPRRAR  | 0,5976 |
| A03 | HLA-A*68:04 | 725  | EILPVSMTK  | 0,6512 |
| A03 | HLA-A*68:04 | 975  | SVLNDILSR  | 0,7053 |
| A03 | HLA-A*68:04 | 1099 | GTHWFVTQR  | 0,6927 |
| A03 | HLA-A*68:08 | 30   | NSFTRGVYY  | 0,6319 |
| A03 | HLA-A*68:08 | 35   | GVYYPDKVFR | 0,6146 |
| A03 | HLA-A*68:08 | 89   | GVYFASTEK  | 0,5888 |
| A03 | HLA-A*68:08 | 192  | FVFKNIDGY  | 0,5341 |
| A03 | HLA-A*68:08 | 258  | WTAGAAAYY  | 0,6296 |
| A03 | HLA-A*68:08 | 311  | GIYQTSNFR  | 0,5259 |
| A03 | HLA-A*68:08 | 349  | SVYAWNRKR  | 0,7003 |
| A03 | HLA-A*68:08 | 361  | CVADYSVLY  | 0,5107 |

|     |             |      |            |        |
|-----|-------------|------|------------|--------|
| A03 | HLA-A*68:08 | 370  | NSASFSTFK  | 0,7548 |
| A03 | HLA-A*68:08 | 394  | NVYADSFVIR | 0,7003 |
| A03 | HLA-A*68:08 | 725  | EILPVSMTK  | 0,8497 |
| A03 | HLA-A*68:08 | 817  | FIEDLLFNK  | 0,54   |
| A03 | HLA-A*68:08 | 827  | TLADAGFIK  | 0,6538 |
| A03 | HLA-A*68:08 | 975  | SVLNDILSR  | 0,7898 |
| A03 | HLA-A*68:08 | 1065 | VTYVPAQEK  | 0,5951 |
| A03 | HLA-A*68:08 | 1099 | GTHWFVTQR  | 0,627  |
| A03 | HLA-A*68:08 | 1173 | NASVVNIQK  | 0,7036 |
| A03 | HLA-A*68:09 | 30   | NSFTRGVYY  | 0,5551 |
| A03 | HLA-A*68:09 | 35   | GVYYPDKVFR | 0,5657 |
| A03 | HLA-A*68:09 | 89   | GVYFASTEK  | 0,5852 |
| A03 | HLA-A*68:09 | 94   | STEKSNIIIR | 0,5242 |
| A03 | HLA-A*68:09 | 258  | WTAGAAAYY  | 0,6062 |
| A03 | HLA-A*68:09 | 302  | TLKSFTVEK  | 0,5606 |
| A03 | HLA-A*68:09 | 311  | GIYQTSNFR  | 0,5449 |
| A03 | HLA-A*68:09 | 349  | SVYAWNRRK  | 0,6482 |
| A03 | HLA-A*68:09 | 370  | NSASFSTFK  | 0,7717 |
| A03 | HLA-A*68:09 | 394  | NVYADSFVIR | 0,6549 |
| A03 | HLA-A*68:09 | 409  | QIAPGQTGK  | 0,5013 |
| A03 | HLA-A*68:09 | 725  | EILPVSMTK  | 0,8372 |
| A03 | HLA-A*68:09 | 782  | FAQVKQIYK  | 0,5222 |
| A03 | HLA-A*68:09 | 817  | FIEDLLFNK  | 0,5307 |
| A03 | HLA-A*68:09 | 827  | TLADAGFIK  | 0,7002 |
| A03 | HLA-A*68:09 | 975  | SVLNDILSR  | 0,773  |
| A03 | HLA-A*68:09 | 1065 | VTYVPAQEK  | 0,5868 |
| A03 | HLA-A*68:09 | 1099 | GTHWFVTQR  | 0,6191 |
| A03 | HLA-A*68:09 | 1173 | NASVVNIQK  | 0,6784 |
| A03 | HLA-A*68:10 | 35   | GVYYPDKVFR | 0,8083 |
| A03 | HLA-A*68:10 | 69   | HVSGTNGTK  | 0,53   |
| A03 | HLA-A*68:10 | 89   | GVYFASTEK  | 0,8449 |
| A03 | HLA-A*68:10 | 142  | GVYYHKNNK  | 0,6813 |
| A03 | HLA-A*68:10 | 150  | KSWMESEFR  | 0,5571 |
| A03 | HLA-A*68:10 | 302  | TLKSFTVEK  | 0,7187 |
| A03 | HLA-A*68:10 | 310  | KGIYQTSNFR | 0,5025 |
| A03 | HLA-A*68:10 | 311  | GIYQTSNFR  | 0,7383 |
| A03 | HLA-A*68:10 | 319  | RVQPTESIVR | 0,5288 |
| A03 | HLA-A*68:10 | 348  | ASVYAWNRRK | 0,6444 |
| A03 | HLA-A*68:10 | 349  | SVYAWNRRK  | 0,7606 |
| A03 | HLA-A*68:10 | 369  | YNSASFSTFK | 0,5505 |
| A03 | HLA-A*68:10 | 370  | NSASFSTFK  | 0,782  |
| A03 | HLA-A*68:10 | 394  | NVYADSFVIR | 0,5174 |
| A03 | HLA-A*68:10 | 408  | RQIAPGQTGK | 0,6091 |
| A03 | HLA-A*68:10 | 409  | QIAPGQTGK  | 0,6387 |
| A03 | HLA-A*68:10 | 454  | RLFRKSNLK  | 0,6427 |
| A03 | HLA-A*68:10 | 458  | KSNLKPFER  | 0,7028 |
| A03 | HLA-A*68:10 | 529  | KSTNLVKNK  | 0,5693 |
| A03 | HLA-A*68:10 | 550  | GVLTESNKK  | 0,5463 |
| A03 | HLA-A*68:10 | 637  | STGSNVFQTR | 0,6581 |
| A03 | HLA-A*68:10 | 724  | TEILPVSMTK | 0,5558 |

|     |             |      |             |        |
|-----|-------------|------|-------------|--------|
| A03 | HLA-A*68:10 | 725  | EILPVSMTK   | 0,6932 |
| A03 | HLA-A*68:10 | 757  | GSFCTQLNR   | 0,5531 |
| A03 | HLA-A*68:10 | 782  | FAQVKQIYK   | 0,5621 |
| A03 | HLA-A*68:10 | 787  | QIYKTPPIK   | 0,5872 |
| A03 | HLA-A*68:10 | 826  | VTLADAGFIK  | 0,6153 |
| A03 | HLA-A*68:10 | 827  | TLADAGFIK   | 0,7116 |
| A03 | HLA-A*68:10 | 939  | SSTASALGK   | 0,5627 |
| A03 | HLA-A*68:10 | 975  | SVLNDILSR   | 0,813  |
| A03 | HLA-A*68:10 | 1019 | RASANLAATK  | 0,5906 |
| A03 | HLA-A*68:10 | 1020 | ASANLAATK   | 0,8515 |
| A03 | HLA-A*68:10 | 1064 | HVTYVPAQEK  | 0,6145 |
| A03 | HLA-A*68:10 | 1065 | VTYVPAQEK   | 0,8181 |
| A03 | HLA-A*68:10 | 1099 | GTHWFVTQR   | 0,8652 |
| A03 | HLA-A*68:10 | 1173 | NASVVNIQK   | 0,5721 |
| A03 | HLA-A*68:12 | 30   | NSFTRGVYY   | 0,668  |
| A03 | HLA-A*68:12 | 35   | GVYYPDKVFR  | 0,7011 |
| A03 | HLA-A*68:12 | 69   | HVSGTNGTK   | 0,6905 |
| A03 | HLA-A*68:12 | 69   | HVSGTNGTKR  | 0,6265 |
| A03 | HLA-A*68:12 | 88   | DGVYFASTEK  | 0,6542 |
| A03 | HLA-A*68:12 | 89   | GVYFASTEK   | 0,6612 |
| A03 | HLA-A*68:12 | 94   | STEKSNIIIR  | 0,5226 |
| A03 | HLA-A*68:12 | 192  | FVFKNIDGY   | 0,6109 |
| A03 | HLA-A*68:12 | 198  | DGYFKIYSK   | 0,5463 |
| A03 | HLA-A*68:12 | 228  | DLPIGINITR  | 0,6101 |
| A03 | HLA-A*68:12 | 258  | WTAGAAAYY   | 0,739  |
| A03 | HLA-A*68:12 | 302  | TLKSFTVEK   | 0,5381 |
| A03 | HLA-A*68:12 | 311  | GIYQTSNFR   | 0,6323 |
| A03 | HLA-A*68:12 | 347  | FASVYAWNR   | 0,6502 |
| A03 | HLA-A*68:12 | 349  | SVYAWNRKR   | 0,7833 |
| A03 | HLA-A*68:12 | 361  | CVADYSVLY   | 0,538  |
| A03 | HLA-A*68:12 | 369  | YNSASFSTFK  | 0,5211 |
| A03 | HLA-A*68:12 | 370  | NSASFSTFK   | 0,8693 |
| A03 | HLA-A*68:12 | 394  | NVYADSFVIR  | 0,8218 |
| A03 | HLA-A*68:12 | 400  | FVIRGDEVR   | 0,7176 |
| A03 | HLA-A*68:12 | 409  | QIAPGQTGK   | 0,6056 |
| A03 | HLA-A*68:12 | 501  | NGVGYQPYPYR | 0,5133 |
| A03 | HLA-A*68:12 | 568  | DIADTTDAVR  | 0,5526 |
| A03 | HLA-A*68:12 | 604  | TSNQVAVLY   | 0,5237 |
| A03 | HLA-A*68:12 | 637  | STGSNVFQTR  | 0,6834 |
| A03 | HLA-A*68:12 | 677  | QTNSPRRAR   | 0,5628 |
| A03 | HLA-A*68:12 | 725  | EILPVSMTK   | 0,8883 |
| A03 | HLA-A*68:12 | 777  | NTQEVFAQVK  | 0,5821 |
| A03 | HLA-A*68:12 | 782  | FAQVKQIYK   | 0,557  |
| A03 | HLA-A*68:12 | 817  | FIEDLLFNK   | 0,5167 |
| A03 | HLA-A*68:12 | 827  | TLADAGFIK   | 0,6674 |
| A03 | HLA-A*68:12 | 975  | SVLNDILSR   | 0,7755 |
| A03 | HLA-A*68:12 | 1020 | ASANLAATK   | 0,5422 |
| A03 | HLA-A*68:12 | 1064 | HVTYVPAQEK  | 0,6592 |
| A03 | HLA-A*68:12 | 1065 | VTYVPAQEK   | 0,6604 |
| A03 | HLA-A*68:12 | 1099 | GTHWFVTQR   | 0,7781 |

|     |             |      |            |        |
|-----|-------------|------|------------|--------|
| A03 | HLA-A*68:12 | 1173 | NASVVNIQK  | 0,8236 |
| A03 | HLA-A*68:13 | 35   | GVYYPDKVFR | 0,8316 |
| A03 | HLA-A*68:13 | 69   | HVSGTNGTK  | 0,5191 |
| A03 | HLA-A*68:13 | 89   | GVYFASTEK  | 0,8528 |
| A03 | HLA-A*68:13 | 142  | GVYYHKNNK  | 0,6657 |
| A03 | HLA-A*68:13 | 258  | WTAGAAAYY  | 0,5568 |
| A03 | HLA-A*68:13 | 302  | TLKSFTVEK  | 0,7097 |
| A03 | HLA-A*68:13 | 311  | GIYQTSNFR  | 0,7417 |
| A03 | HLA-A*68:13 | 348  | ASVYAWNRRK | 0,588  |
| A03 | HLA-A*68:13 | 349  | SVYAWNRRK  | 0,7769 |
| A03 | HLA-A*68:13 | 369  | YNSASFSTFK | 0,5945 |
| A03 | HLA-A*68:13 | 370  | NSASFSTFK  | 0,7984 |
| A03 | HLA-A*68:13 | 394  | NVYADSFVIR | 0,6004 |
| A03 | HLA-A*68:13 | 400  | FVIRGDEV   | 0,5034 |
| A03 | HLA-A*68:13 | 409  | QIAPGQTGK  | 0,6035 |
| A03 | HLA-A*68:13 | 454  | RLFRKSNLK  | 0,5075 |
| A03 | HLA-A*68:13 | 458  | KSNLKPFR   | 0,5406 |
| A03 | HLA-A*68:13 | 637  | STGSNVFQTR | 0,6827 |
| A03 | HLA-A*68:13 | 724  | TEILPVSMTK | 0,541  |
| A03 | HLA-A*68:13 | 725  | EILPVSMTK  | 0,7319 |
| A03 | HLA-A*68:13 | 757  | GSFCTQLNR  | 0,5489 |
| A03 | HLA-A*68:13 | 782  | FAQVKQIYK  | 0,5799 |
| A03 | HLA-A*68:13 | 787  | QIYKTPPIK  | 0,5619 |
| A03 | HLA-A*68:13 | 826  | VTLADAGFIK | 0,6185 |
| A03 | HLA-A*68:13 | 827  | TLADAGFIK  | 0,6995 |
| A03 | HLA-A*68:13 | 939  | SSTASALGK  | 0,5057 |
| A03 | HLA-A*68:13 | 975  | SVLNDILSR  | 0,8131 |
| A03 | HLA-A*68:13 | 1020 | ASANLAATK  | 0,8167 |
| A03 | HLA-A*68:13 | 1064 | HVTYVPAQEK | 0,6451 |
| A03 | HLA-A*68:13 | 1065 | VTYVPAQEK  | 0,823  |
| A03 | HLA-A*68:13 | 1099 | GTHWFVTQR  | 0,8791 |
| A03 | HLA-A*68:13 | 1173 | NASVVNIQK  | 0,58   |
| A03 | HLA-A*68:14 | 35   | GVYYPDKVFR | 0,8083 |
| A03 | HLA-A*68:14 | 69   | HVSGTNGTK  | 0,53   |
| A03 | HLA-A*68:14 | 89   | GVYFASTEK  | 0,8449 |
| A03 | HLA-A*68:14 | 142  | GVYYHKNNK  | 0,6813 |
| A03 | HLA-A*68:14 | 150  | KSWMESEFR  | 0,5571 |
| A03 | HLA-A*68:14 | 302  | TLKSFTVEK  | 0,7187 |
| A03 | HLA-A*68:14 | 310  | KGIYQTSNFR | 0,5025 |
| A03 | HLA-A*68:14 | 311  | GIYQTSNFR  | 0,7383 |
| A03 | HLA-A*68:14 | 319  | RVQPTESIVR | 0,5288 |
| A03 | HLA-A*68:14 | 348  | ASVYAWNRRK | 0,6444 |
| A03 | HLA-A*68:14 | 349  | SVYAWNRRK  | 0,7606 |
| A03 | HLA-A*68:14 | 369  | YNSASFSTFK | 0,5505 |
| A03 | HLA-A*68:14 | 370  | NSASFSTFK  | 0,782  |
| A03 | HLA-A*68:14 | 394  | NVYADSFVIR | 0,5174 |
| A03 | HLA-A*68:14 | 408  | RQIAPGQTGK | 0,6091 |
| A03 | HLA-A*68:14 | 409  | QIAPGQTGK  | 0,6387 |
| A03 | HLA-A*68:14 | 454  | RLFRKSNLK  | 0,6427 |
| A03 | HLA-A*68:14 | 458  | KSNLKPFR   | 0,7028 |

|     |             |      |             |        |
|-----|-------------|------|-------------|--------|
| A03 | HLA-A*68:14 | 529  | KSTNLVKNK   | 0,5693 |
| A03 | HLA-A*68:14 | 550  | GVLTESNKK   | 0,5463 |
| A03 | HLA-A*68:14 | 637  | STGSNVFQTR  | 0,6581 |
| A03 | HLA-A*68:14 | 724  | TEILPVSMTK  | 0,5558 |
| A03 | HLA-A*68:14 | 725  | EILPVSMTK   | 0,6932 |
| A03 | HLA-A*68:14 | 757  | GSFCTQLNR   | 0,5531 |
| A03 | HLA-A*68:14 | 782  | FAQVKQIYK   | 0,5621 |
| A03 | HLA-A*68:14 | 787  | QIYKTPPIK   | 0,5872 |
| A03 | HLA-A*68:14 | 826  | VTLADAGFIK  | 0,6153 |
| A03 | HLA-A*68:14 | 827  | TLADAGFIK   | 0,7116 |
| A03 | HLA-A*68:14 | 939  | SSTASALGK   | 0,5627 |
| A03 | HLA-A*68:14 | 975  | SVLNDILSR   | 0,813  |
| A03 | HLA-A*68:14 | 1019 | RASANLAATK  | 0,5906 |
| A03 | HLA-A*68:14 | 1020 | ASANLAATK   | 0,8515 |
| A03 | HLA-A*68:14 | 1064 | HVTYVPAQEK  | 0,6145 |
| A03 | HLA-A*68:14 | 1065 | VTYVPAQEK   | 0,8181 |
| A03 | HLA-A*68:14 | 1099 | GTHWFVTQR   | 0,8652 |
| A03 | HLA-A*68:14 | 1173 | NASVVNIQK   | 0,5721 |
| A03 | HLA-A*68:16 | 30   | NSFTRGVYY   | 0,668  |
| A03 | HLA-A*68:16 | 35   | GVYYPDKVFR  | 0,7011 |
| A03 | HLA-A*68:16 | 69   | HVSGTNGTK   | 0,6905 |
| A03 | HLA-A*68:16 | 69   | HVSGTNGTKR  | 0,6265 |
| A03 | HLA-A*68:16 | 88   | DGVYFASTEK  | 0,6542 |
| A03 | HLA-A*68:16 | 89   | GVYFASTEK   | 0,6612 |
| A03 | HLA-A*68:16 | 94   | STEKSNIIR   | 0,5226 |
| A03 | HLA-A*68:16 | 192  | FVFKNIDGY   | 0,6109 |
| A03 | HLA-A*68:16 | 198  | DGYFKIYSK   | 0,5463 |
| A03 | HLA-A*68:16 | 228  | DLPIGINITR  | 0,6101 |
| A03 | HLA-A*68:16 | 258  | WTAGAAAYY   | 0,739  |
| A03 | HLA-A*68:16 | 302  | TLKSFTVEK   | 0,5381 |
| A03 | HLA-A*68:16 | 311  | GIYQTSNFR   | 0,6323 |
| A03 | HLA-A*68:16 | 347  | FASVYAWNR   | 0,6502 |
| A03 | HLA-A*68:16 | 349  | SVYAWNRKR   | 0,7833 |
| A03 | HLA-A*68:16 | 361  | CVADYSVLY   | 0,538  |
| A03 | HLA-A*68:16 | 369  | YNSASFSTFK  | 0,5211 |
| A03 | HLA-A*68:16 | 370  | NSASFSTFK   | 0,8693 |
| A03 | HLA-A*68:16 | 394  | NVYADSFVIR  | 0,8218 |
| A03 | HLA-A*68:16 | 400  | FVIRGDEV    | 0,7176 |
| A03 | HLA-A*68:16 | 409  | QIAPGQTGK   | 0,6056 |
| A03 | HLA-A*68:16 | 501  | NGVGYQPYPYR | 0,5133 |
| A03 | HLA-A*68:16 | 568  | DIADTTDAVR  | 0,5526 |
| A03 | HLA-A*68:16 | 604  | TSNQVAVLY   | 0,5237 |
| A03 | HLA-A*68:16 | 637  | STGSNVFQTR  | 0,6834 |
| A03 | HLA-A*68:16 | 677  | QTNSPRRAR   | 0,5628 |
| A03 | HLA-A*68:16 | 725  | EILPVSMTK   | 0,8883 |
| A03 | HLA-A*68:16 | 777  | NTQEVFAQVK  | 0,5821 |
| A03 | HLA-A*68:16 | 782  | FAQVKQIYK   | 0,557  |
| A03 | HLA-A*68:16 | 817  | FIEDLLFNK   | 0,5167 |
| A03 | HLA-A*68:16 | 827  | TLADAGFIK   | 0,6674 |
| A03 | HLA-A*68:16 | 975  | SVLNDILSR   | 0,7755 |

|     |             |      |             |        |
|-----|-------------|------|-------------|--------|
| A03 | HLA-A*68:16 | 1020 | ASANLAATK   | 0,5422 |
| A03 | HLA-A*68:16 | 1064 | HVTYVPAQEK  | 0,6592 |
| A03 | HLA-A*68:16 | 1065 | VTYVPAQEK   | 0,6604 |
| A03 | HLA-A*68:16 | 1099 | GTHWFVTQR   | 0,7781 |
| A03 | HLA-A*68:16 | 1173 | NASVVNIQK   | 0,8236 |
| A03 | HLA-A*68:19 | 30   | NSFTRGVYY   | 0,668  |
| A03 | HLA-A*68:19 | 35   | GVYYPDKVFR  | 0,7011 |
| A03 | HLA-A*68:19 | 69   | HVSGTNGTK   | 0,6905 |
| A03 | HLA-A*68:19 | 69   | HVSGTNGTKR  | 0,6265 |
| A03 | HLA-A*68:19 | 88   | DGVYFASTEK  | 0,6542 |
| A03 | HLA-A*68:19 | 89   | GVYFASTEK   | 0,6612 |
| A03 | HLA-A*68:19 | 94   | STEKSNIIR   | 0,5226 |
| A03 | HLA-A*68:19 | 192  | FVFKNIDGY   | 0,6109 |
| A03 | HLA-A*68:19 | 198  | DGYFKIYSK   | 0,5463 |
| A03 | HLA-A*68:19 | 228  | DLPIGINITR  | 0,6101 |
| A03 | HLA-A*68:19 | 258  | WTAGAAAYY   | 0,739  |
| A03 | HLA-A*68:19 | 302  | TLKSFTVEK   | 0,5381 |
| A03 | HLA-A*68:19 | 311  | GIYQTSNFR   | 0,6323 |
| A03 | HLA-A*68:19 | 347  | FASVYAWNR   | 0,6502 |
| A03 | HLA-A*68:19 | 349  | SVYAWNRKR   | 0,7833 |
| A03 | HLA-A*68:19 | 361  | CVADYSVLY   | 0,538  |
| A03 | HLA-A*68:19 | 369  | YNSASFSTFK  | 0,5211 |
| A03 | HLA-A*68:19 | 370  | NSASFSTFK   | 0,8693 |
| A03 | HLA-A*68:19 | 394  | NVYADSFVIR  | 0,8218 |
| A03 | HLA-A*68:19 | 400  | FVIRGDEVR   | 0,7176 |
| A03 | HLA-A*68:19 | 409  | QIAPGQTGK   | 0,6056 |
| A03 | HLA-A*68:19 | 501  | NGVGYQPYPYR | 0,5133 |
| A03 | HLA-A*68:19 | 568  | DIADTTDAVR  | 0,5526 |
| A03 | HLA-A*68:19 | 604  | TSNQVAVLY   | 0,5237 |
| A03 | HLA-A*68:19 | 637  | STGSNVFQTR  | 0,6834 |
| A03 | HLA-A*68:19 | 677  | QTNSPRRAR   | 0,5628 |
| A03 | HLA-A*68:19 | 725  | EILPVSMTK   | 0,8883 |
| A03 | HLA-A*68:19 | 777  | NTQEVFAQVK  | 0,5821 |
| A03 | HLA-A*68:19 | 782  | FAQVKQIYK   | 0,557  |
| A03 | HLA-A*68:19 | 817  | FIEDLLFNK   | 0,5167 |
| A03 | HLA-A*68:19 | 827  | TLADAGFIK   | 0,6674 |
| A03 | HLA-A*68:19 | 975  | SVLNDILSR   | 0,7755 |
| A03 | HLA-A*68:19 | 1020 | ASANLAATK   | 0,5422 |
| A03 | HLA-A*68:19 | 1064 | HVTYVPAQEK  | 0,6592 |
| A03 | HLA-A*68:19 | 1065 | VTYVPAQEK   | 0,6604 |
| A03 | HLA-A*68:19 | 1099 | GTHWFVTQR   | 0,7781 |
| A03 | HLA-A*68:19 | 1173 | NASVVNIQK   | 0,8236 |
| A03 | HLA-A*68:21 | 30   | NSFTRGVYY   | 0,668  |
| A03 | HLA-A*68:21 | 35   | GVYYPDKVFR  | 0,7011 |
| A03 | HLA-A*68:21 | 69   | HVSGTNGTK   | 0,6905 |
| A03 | HLA-A*68:21 | 69   | HVSGTNGTKR  | 0,6265 |
| A03 | HLA-A*68:21 | 88   | DGVYFASTEK  | 0,6542 |
| A03 | HLA-A*68:21 | 89   | GVYFASTEK   | 0,6612 |
| A03 | HLA-A*68:21 | 94   | STEKSNIIR   | 0,5226 |
| A03 | HLA-A*68:21 | 192  | FVFKNIDGY   | 0,6109 |



|     |             |      |            |        |
|-----|-------------|------|------------|--------|
| A03 | HLA-A*68:21 | 198  | DGYFKIYSK  | 0,5463 |
| A03 | HLA-A*68:21 | 228  | DLPIGINITR | 0,6101 |
| A03 | HLA-A*68:21 | 258  | WTAGAAAYY  | 0,739  |
| A03 | HLA-A*68:21 | 302  | TLKSFTVEK  | 0,5381 |
| A03 | HLA-A*68:21 | 311  | GIYQTSNFR  | 0,6323 |
| A03 | HLA-A*68:21 | 347  | FASVYAWNR  | 0,6502 |
| A03 | HLA-A*68:21 | 349  | SVYAWNRKR  | 0,7833 |
| A03 | HLA-A*68:21 | 361  | CVADYSVLY  | 0,538  |
| A03 | HLA-A*68:21 | 369  | YNSASFSTFK | 0,5211 |
| A03 | HLA-A*68:21 | 370  | NSASFSTFK  | 0,8693 |
| A03 | HLA-A*68:21 | 394  | NVYADSFVIR | 0,8218 |
| A03 | HLA-A*68:21 | 400  | FVIRGDEV   | 0,7176 |
| A03 | HLA-A*68:21 | 409  | QIAPGQTGK  | 0,6056 |
| A03 | HLA-A*68:21 | 501  | NGVGYQPYP  | 0,5133 |
| A03 | HLA-A*68:21 | 568  | DIADTTDAVR | 0,5526 |
| A03 | HLA-A*68:21 | 604  | TSNQVAVLY  | 0,5237 |
| A03 | HLA-A*68:21 | 637  | STGSNVFQTR | 0,6834 |
| A03 | HLA-A*68:21 | 677  | QTNSPRRAR  | 0,5628 |
| A03 | HLA-A*68:21 | 725  | EILPVSMTK  | 0,8883 |
| A03 | HLA-A*68:21 | 777  | NTQEVFAQVK | 0,5821 |
| A03 | HLA-A*68:21 | 782  | FAQVKQIYK  | 0,557  |
| A03 | HLA-A*68:21 | 817  | FIEDLLFNK  | 0,5167 |
| A03 | HLA-A*68:21 | 827  | TLADAGFIK  | 0,6674 |
| A03 | HLA-A*68:21 | 975  | SVLNDILSR  | 0,7755 |
| A03 | HLA-A*68:21 | 1020 | ASANLAATK  | 0,5422 |
| A03 | HLA-A*68:21 | 1064 | HVTYVPAQEK | 0,6592 |
| A03 | HLA-A*68:21 | 1065 | VTYVPAQEK  | 0,6604 |
| A03 | HLA-A*68:21 | 1099 | GTHWFVTQR  | 0,7781 |
| A03 | HLA-A*68:21 | 1173 | NASVVNIQK  | 0,8236 |
| A03 | HLA-A*68:22 | 30   | NSFTRGVYY  | 0,668  |
| A03 | HLA-A*68:22 | 35   | GVYYPDKVFR | 0,7011 |
| A03 | HLA-A*68:22 | 69   | HVSGTNGTK  | 0,6905 |
| A03 | HLA-A*68:22 | 69   | HVSGTNGTKR | 0,6265 |
| A03 | HLA-A*68:22 | 88   | DGVYFASTEK | 0,6542 |
| A03 | HLA-A*68:22 | 89   | GVYFASTEK  | 0,6612 |
| A03 | HLA-A*68:22 | 94   | STEKSNIIR  | 0,5226 |
| A03 | HLA-A*68:22 | 192  | FVFKNIDGY  | 0,6109 |
| A03 | HLA-A*68:22 | 198  | DGYFKIYSK  | 0,5463 |
| A03 | HLA-A*68:22 | 228  | DLPIGINITR | 0,6101 |
| A03 | HLA-A*68:22 | 258  | WTAGAAAYY  | 0,739  |
| A03 | HLA-A*68:22 | 302  | TLKSFTVEK  | 0,5381 |
| A03 | HLA-A*68:22 | 311  | GIYQTSNFR  | 0,6323 |
| A03 | HLA-A*68:22 | 347  | FASVYAWNR  | 0,6502 |
| A03 | HLA-A*68:22 | 349  | SVYAWNRKR  | 0,7833 |
| A03 | HLA-A*68:22 | 361  | CVADYSVLY  | 0,538  |
| A03 | HLA-A*68:22 | 369  | YNSASFSTFK | 0,5211 |
| A03 | HLA-A*68:22 | 370  | NSASFSTFK  | 0,8693 |
| A03 | HLA-A*68:22 | 394  | NVYADSFVIR | 0,8218 |
| A03 | HLA-A*68:22 | 400  | FVIRGDEV   | 0,7176 |
| A03 | HLA-A*68:22 | 409  | QIAPGQTGK  | 0,6056 |

|     |             |      |            |        |
|-----|-------------|------|------------|--------|
| A03 | HLA-A*68:22 | 501  | NGVGYQPYPY | 0,5133 |
| A03 | HLA-A*68:22 | 568  | DIADTTDAVR | 0,5526 |
| A03 | HLA-A*68:22 | 604  | TSNQVAVLY  | 0,5237 |
| A03 | HLA-A*68:22 | 637  | STGSNVFQTR | 0,6834 |
| A03 | HLA-A*68:22 | 677  | QTNSPRRAR  | 0,5628 |
| A03 | HLA-A*68:22 | 725  | EILPVSMTK  | 0,8883 |
| A03 | HLA-A*68:22 | 777  | NTQEVFAQVK | 0,5821 |
| A03 | HLA-A*68:22 | 782  | FAQVKQIYK  | 0,557  |
| A03 | HLA-A*68:22 | 817  | FIEDLLFNK  | 0,5167 |
| A03 | HLA-A*68:22 | 827  | TLADAGFIK  | 0,6674 |
| A03 | HLA-A*68:22 | 975  | SVLNDILSR  | 0,7755 |
| A03 | HLA-A*68:22 | 1020 | ASANLAATK  | 0,5422 |
| A03 | HLA-A*68:22 | 1064 | HVTYVPAQEK | 0,6592 |
| A03 | HLA-A*68:22 | 1065 | VTYVPAQEK  | 0,6604 |
| A03 | HLA-A*68:22 | 1099 | GTHWFVTQR  | 0,7781 |
| A03 | HLA-A*68:22 | 1173 | NASVVNIQK  | 0,8236 |
| A03 | HLA-A*68:24 | 30   | NSFTRGVYY  | 0,668  |
| A03 | HLA-A*68:24 | 35   | GVYYPDKVFR | 0,7011 |
| A03 | HLA-A*68:24 | 69   | HVSGTNGTK  | 0,6905 |
| A03 | HLA-A*68:24 | 69   | HVSGTNGTKR | 0,6265 |
| A03 | HLA-A*68:24 | 88   | DGVYFASTEK | 0,6542 |
| A03 | HLA-A*68:24 | 89   | GVYFASTEK  | 0,6612 |
| A03 | HLA-A*68:24 | 94   | STEKSNIIIR | 0,5226 |
| A03 | HLA-A*68:24 | 192  | FVFKNIDGY  | 0,6109 |
| A03 | HLA-A*68:24 | 198  | DGYFKIYSK  | 0,5463 |
| A03 | HLA-A*68:24 | 228  | DLPIGINITR | 0,6101 |
| A03 | HLA-A*68:24 | 258  | WTAGAAAYY  | 0,739  |
| A03 | HLA-A*68:24 | 302  | TLKSFTVEK  | 0,5381 |
| A03 | HLA-A*68:24 | 311  | GIYQTSNFR  | 0,6323 |
| A03 | HLA-A*68:24 | 347  | FASVYAWNR  | 0,6502 |
| A03 | HLA-A*68:24 | 349  | SVYAWNRKR  | 0,7833 |
| A03 | HLA-A*68:24 | 361  | CVADYSVLY  | 0,538  |
| A03 | HLA-A*68:24 | 369  | YNSASFSTFK | 0,5211 |
| A03 | HLA-A*68:24 | 370  | NSASFSTFK  | 0,8693 |
| A03 | HLA-A*68:24 | 394  | NVYADSFVIR | 0,8218 |
| A03 | HLA-A*68:24 | 400  | FVIRGDEVIR | 0,7176 |
| A03 | HLA-A*68:24 | 409  | QIAPGQTGK  | 0,6056 |
| A03 | HLA-A*68:24 | 501  | NGVGYQPYPY | 0,5133 |
| A03 | HLA-A*68:24 | 568  | DIADTTDAVR | 0,5526 |
| A03 | HLA-A*68:24 | 604  | TSNQVAVLY  | 0,5237 |
| A03 | HLA-A*68:24 | 637  | STGSNVFQTR | 0,6834 |
| A03 | HLA-A*68:24 | 677  | QTNSPRRAR  | 0,5628 |
| A03 | HLA-A*68:24 | 725  | EILPVSMTK  | 0,8883 |
| A03 | HLA-A*68:24 | 777  | NTQEVFAQVK | 0,5821 |
| A03 | HLA-A*68:24 | 782  | FAQVKQIYK  | 0,557  |
| A03 | HLA-A*68:24 | 817  | FIEDLLFNK  | 0,5167 |
| A03 | HLA-A*68:24 | 827  | TLADAGFIK  | 0,6674 |
| A03 | HLA-A*68:24 | 975  | SVLNDILSR  | 0,7755 |
| A03 | HLA-A*68:24 | 1020 | ASANLAATK  | 0,5422 |
| A03 | HLA-A*68:24 | 1064 | HVTYVPAQEK | 0,6592 |

|     |             |      |            |        |
|-----|-------------|------|------------|--------|
| A03 | HLA-A*68:24 | 1065 | VTYVPAQEK  | 0,6604 |
| A03 | HLA-A*68:24 | 1099 | GTHWFVTQR  | 0,7781 |
| A03 | HLA-A*68:24 | 1173 | NASVVNIQK  | 0,8236 |
| A03 | HLA-A*68:25 | 30   | NSFTRGVYY  | 0,668  |
| A03 | HLA-A*68:25 | 35   | GVYYPDKVFR | 0,7011 |
| A03 | HLA-A*68:25 | 69   | HVSGTNGTK  | 0,6905 |
| A03 | HLA-A*68:25 | 69   | HVSGTNGTKR | 0,6265 |
| A03 | HLA-A*68:25 | 88   | DGVYFASTEK | 0,6542 |
| A03 | HLA-A*68:25 | 89   | GVYFASTEK  | 0,6612 |
| A03 | HLA-A*68:25 | 94   | STEKSNIIIR | 0,5226 |
| A03 | HLA-A*68:25 | 192  | FVFKNIDGY  | 0,6109 |
| A03 | HLA-A*68:25 | 198  | DGYFKIYSK  | 0,5463 |
| A03 | HLA-A*68:25 | 228  | DLPIGINITR | 0,6101 |
| A03 | HLA-A*68:25 | 258  | WTAGAAAYY  | 0,739  |
| A03 | HLA-A*68:25 | 302  | TLKSFTVEK  | 0,5381 |
| A03 | HLA-A*68:25 | 311  | GIYQTSNFR  | 0,6323 |
| A03 | HLA-A*68:25 | 347  | FASVYAWNR  | 0,6502 |
| A03 | HLA-A*68:25 | 349  | SVYAWNRKR  | 0,7833 |
| A03 | HLA-A*68:25 | 361  | CVADYSVLY  | 0,538  |
| A03 | HLA-A*68:25 | 369  | YNSASFSTFK | 0,5211 |
| A03 | HLA-A*68:25 | 370  | NSASFSTFK  | 0,8693 |
| A03 | HLA-A*68:25 | 394  | NVYADSFVIR | 0,8218 |
| A03 | HLA-A*68:25 | 400  | FVIRGDEV   | 0,7176 |
| A03 | HLA-A*68:25 | 409  | QIAPGQTGK  | 0,6056 |
| A03 | HLA-A*68:25 | 501  | NGVGYQPYP  | 0,5133 |
| A03 | HLA-A*68:25 | 568  | DIADTTDAVR | 0,5526 |
| A03 | HLA-A*68:25 | 604  | TSNQVAVLY  | 0,5237 |
| A03 | HLA-A*68:25 | 637  | STGSNVFQTR | 0,6834 |
| A03 | HLA-A*68:25 | 677  | QTNSPRRAR  | 0,5628 |
| A03 | HLA-A*68:25 | 725  | EILPVSMTK  | 0,8883 |
| A03 | HLA-A*68:25 | 777  | NTQEVFAQVK | 0,5821 |
| A03 | HLA-A*68:25 | 782  | FAQVKQIYK  | 0,557  |
| A03 | HLA-A*68:25 | 817  | FIEDLLFNK  | 0,5167 |
| A03 | HLA-A*68:25 | 827  | TLADAGFIK  | 0,6674 |
| A03 | HLA-A*68:25 | 975  | SVLNDILSR  | 0,7755 |
| A03 | HLA-A*68:25 | 1020 | ASANLAATK  | 0,5422 |
| A03 | HLA-A*68:25 | 1064 | HVTYVPAQEK | 0,6592 |
| A03 | HLA-A*68:25 | 1065 | VTYVPAQEK  | 0,6604 |
| A03 | HLA-A*68:25 | 1099 | GTHWFVTQR  | 0,7781 |
| A03 | HLA-A*68:25 | 1173 | NASVVNIQK  | 0,8236 |
| A03 | HLA-A*68:26 | 258  | WTAGAAAYY  | 0,5231 |
| A03 | HLA-A*68:26 | 370  | NSASFSTFK  | 0,5588 |
| A03 | HLA-A*68:26 | 725  | EILPVSMTK  | 0,699  |
| A03 | HLA-A*68:26 | 827  | TLADAGFIK  | 0,5161 |
| A03 | HLA-A*74:01 | 349  | SVYAWNRKR  | 0,536  |
| A03 | HLA-A*74:02 | 349  | SVYAWNRKR  | 0,536  |
| A03 | HLA-A*74:03 | 349  | SVYAWNRKR  | 0,536  |
| A03 | HLA-A*74:05 | 35   | GVYYPDKVFR | 0,5051 |
| A03 | HLA-A*74:05 | 349  | SVYAWNRKR  | 0,5895 |
| A03 | HLA-A*74:05 | 454  | RLFRKSNLK  | 0,5208 |

|     |             |      |              |        |
|-----|-------------|------|--------------|--------|
| A03 | HLA-A*74:05 | 1099 | GTHWFVTQR    | 0,5226 |
| A03 | HLA-A*74:07 | 35   | GVYYPDKVFR   | 0,5118 |
| A03 | HLA-A*74:07 | 349  | SVYAWNRRKR   | 0,6319 |
| A03 | HLA-A*74:07 | 1099 | GTHWFVTQR    | 0,5316 |
| A03 | HLA-A*74:08 | 349  | SVYAWNRRKR   | 0,536  |
| A03 | HLA-A*74:09 | 349  | SVYAWNRRKR   | 0,536  |
| A03 | HLA-A*74:11 | 349  | SVYAWNRRKR   | 0,536  |
| A24 | HLA-A*23:01 | 57   | PFFSNVTWF    | 0,9141 |
| A24 | HLA-A*23:01 | 78   | RFDNPVLPF    | 0,8396 |
| A24 | HLA-A*23:01 | 143  | VYYHKNNKSW   | 0,7142 |
| A24 | HLA-A*23:01 | 144  | YYHKNNKSW    | 0,8036 |
| A24 | HLA-A*23:01 | 159  | VYSSANNCTF   | 0,917  |
| A24 | HLA-A*23:01 | 169  | EYV SQPFLM   | 0,8499 |
| A24 | HLA-A*23:01 | 193  | VFKNIDGYF    | 0,7818 |
| A24 | HLA-A*23:01 | 203  | IYSKHTPINL   | 0,6028 |
| A24 | HLA-A*23:01 | 264  | AYYYGYLQPRTF | 0,7912 |
| A24 | HLA-A*23:01 | 265  | YYVGYLQPRTF  | 0,879  |
| A24 | HLA-A*23:01 | 268  | GYLQPRTFLL   | 0,7046 |
| A24 | HLA-A*23:01 | 269  | YLQPRTFLL    | 0,5573 |
| A24 | HLA-A*23:01 | 312  | IYQTSNFRV    | 0,6966 |
| A24 | HLA-A*23:01 | 328  | RFPNITNLCPF  | 0,8158 |
| A24 | HLA-A*23:01 | 368  | LYNSASFSTF   | 0,8553 |
| A24 | HLA-A*23:01 | 395  | VYADSFVI     | 0,5149 |
| A24 | HLA-A*23:01 | 448  | NYNLYRLF     | 0,8881 |
| A24 | HLA-A*23:01 | 488  | CYFPLQSYGF   | 0,6136 |
| A24 | HLA-A*23:01 | 489  | YFPLQSYGF    | 0,9108 |
| A24 | HLA-A*23:01 | 504  | GYQPYRVVLSF  | 0,667  |
| A24 | HLA-A*23:01 | 507  | PYRVVLSF     | 0,8298 |
| A24 | HLA-A*23:01 | 558  | KFLPFQQF     | 0,7881 |
| A24 | HLA-A*23:01 | 634  | RVYSTGSNVF   | 0,5782 |
| A24 | HLA-A*23:01 | 635  | VYSTGSNVF    | 0,934  |
| A24 | HLA-A*23:01 | 788  | IYKTPPIKDF   | 0,9066 |
| A24 | HLA-A*23:01 | 816  | SFIEDLLF     | 0,7909 |
| A24 | HLA-A*23:01 | 880  | GTITSGWTF    | 0,5317 |
| A24 | HLA-A*23:01 | 898  | FAMQMAYRF    | 0,5028 |
| A24 | HLA-A*23:01 | 1066 | TYVPAQEKNF   | 0,9478 |
| A24 | HLA-A*23:01 | 1094 | VFVSNGTHW    | 0,8761 |
| A24 | HLA-A*23:01 | 1094 | VFVSNGTHWF   | 0,8258 |
| A24 | HLA-A*23:01 | 1101 | HWFVTQRNF    | 0,7845 |
| A24 | HLA-A*23:01 | 1137 | VYDPLQPELDSF | 0,7515 |
| A24 | HLA-A*23:01 | 1208 | QYIKWPWYI    | 0,9638 |
| A24 | HLA-A*23:01 | 1208 | QYIKWPWYIW   | 0,7814 |
| A24 | HLA-A*23:01 | 1211 | KWPWYIWLGF   | 0,6037 |
| A24 | HLA-A*23:01 | 1216 | IWLGFIAGL    | 0,5925 |
| A24 | HLA-A*23:02 | 57   | PFFSNVTWF    | 0,8811 |
| A24 | HLA-A*23:02 | 143  | VYYHKNNKSW   | 0,7728 |
| A24 | HLA-A*23:02 | 144  | YYHKNNKSW    | 0,8613 |
| A24 | HLA-A*23:02 | 159  | VYSSANNCTF   | 0,9503 |
| A24 | HLA-A*23:02 | 169  | EYV SQPFLM   | 0,8797 |
| A24 | HLA-A*23:02 | 193  | VFKNIDGYF    | 0,8456 |

|     |             |      |              |        |
|-----|-------------|------|--------------|--------|
| A24 | HLA-A*23:02 | 203  | IYSKHTPINL   | 0,6962 |
| A24 | HLA-A*23:02 | 264  | AYYVGYLQPRTF | 0,759  |
| A24 | HLA-A*23:02 | 265  | YYVGYLQPRTF  | 0,9004 |
| A24 | HLA-A*23:02 | 268  | GYLQPRTFLL   | 0,6697 |
| A24 | HLA-A*23:02 | 269  | YLQPRTFLL    | 0,5368 |
| A24 | HLA-A*23:02 | 312  | IYQTSNFRV    | 0,6415 |
| A24 | HLA-A*23:02 | 328  | RFPNITNLCPF  | 0,8669 |
| A24 | HLA-A*23:02 | 368  | LYNSASFSTF   | 0,901  |
| A24 | HLA-A*23:02 | 448  | NYNLYRLF     | 0,9202 |
| A24 | HLA-A*23:02 | 488  | CYFPLQSYGF   | 0,6273 |
| A24 | HLA-A*23:02 | 489  | YFPLQSYGF    | 0,9384 |
| A24 | HLA-A*23:02 | 504  | GYQPYRVVLSF  | 0,6274 |
| A24 | HLA-A*23:02 | 507  | PYRVVLSF     | 0,8272 |
| A24 | HLA-A*23:02 | 634  | RVYSTGSNVF   | 0,7093 |
| A24 | HLA-A*23:02 | 635  | VYSTGSNVF    | 0,9475 |
| A24 | HLA-A*23:02 | 755  | QYGSFCTQL    | 0,5573 |
| A24 | HLA-A*23:02 | 788  | IYKTPPIKDF   | 0,9187 |
| A24 | HLA-A*23:02 | 1066 | TYVPAQEKNF   | 0,9671 |
| A24 | HLA-A*23:02 | 1094 | VFVSNGTHW    | 0,8829 |
| A24 | HLA-A*23:02 | 1094 | VFVSNGTHWF   | 0,8701 |
| A24 | HLA-A*23:02 | 1101 | HWFVTQRNF    | 0,7966 |
| A24 | HLA-A*23:02 | 1208 | QYIKWPWYI    | 0,9423 |
| A24 | HLA-A*23:02 | 1208 | QYIKWPWYIW   | 0,7679 |
| A24 | HLA-A*23:02 | 1211 | KWPWYIWLGF   | 0,5976 |
| A24 | HLA-A*23:03 | 57   | PFFSNVTWF    | 0,9141 |
| A24 | HLA-A*23:03 | 78   | RFDNPVLPF    | 0,8396 |
| A24 | HLA-A*23:03 | 143  | VYYHKNNKSW   | 0,7142 |
| A24 | HLA-A*23:03 | 144  | YYHKNNKSW    | 0,8036 |
| A24 | HLA-A*23:03 | 159  | VYSSANNCTF   | 0,917  |
| A24 | HLA-A*23:03 | 169  | EYVSQPFLM    | 0,8499 |
| A24 | HLA-A*23:03 | 193  | VFKNIDGYF    | 0,7818 |
| A24 | HLA-A*23:03 | 203  | IYSKHTPINL   | 0,6028 |
| A24 | HLA-A*23:03 | 264  | AYYVGYLQPRTF | 0,7912 |
| A24 | HLA-A*23:03 | 265  | YYVGYLQPRTF  | 0,879  |
| A24 | HLA-A*23:03 | 268  | GYLQPRTFLL   | 0,7046 |
| A24 | HLA-A*23:03 | 269  | YLQPRTFLL    | 0,5573 |
| A24 | HLA-A*23:03 | 312  | IYQTSNFRV    | 0,6966 |
| A24 | HLA-A*23:03 | 328  | RFPNITNLCPF  | 0,8158 |
| A24 | HLA-A*23:03 | 368  | LYNSASFSTF   | 0,8553 |
| A24 | HLA-A*23:03 | 395  | VYADSFVI     | 0,5149 |
| A24 | HLA-A*23:03 | 448  | NYNLYRLF     | 0,8881 |
| A24 | HLA-A*23:03 | 488  | CYFPLQSYGF   | 0,6136 |
| A24 | HLA-A*23:03 | 489  | YFPLQSYGF    | 0,9108 |
| A24 | HLA-A*23:03 | 504  | GYQPYRVVLSF  | 0,667  |
| A24 | HLA-A*23:03 | 507  | PYRVVLSF     | 0,8298 |
| A24 | HLA-A*23:03 | 558  | KFLPFQQF     | 0,7881 |
| A24 | HLA-A*23:03 | 634  | RVYSTGSNVF   | 0,5782 |
| A24 | HLA-A*23:03 | 635  | VYSTGSNVF    | 0,934  |
| A24 | HLA-A*23:03 | 788  | IYKTPPIKDF   | 0,9066 |
| A24 | HLA-A*23:03 | 816  | SFIEDLLF     | 0,7909 |

|     |             |      |              |        |
|-----|-------------|------|--------------|--------|
| A24 | HLA-A*23:03 | 880  | GTITSGWTF    | 0,5317 |
| A24 | HLA-A*23:03 | 898  | FAMQMAYRF    | 0,5028 |
| A24 | HLA-A*23:03 | 1066 | TYVPAQEKNF   | 0,9478 |
| A24 | HLA-A*23:03 | 1094 | VFVSNATHW    | 0,8761 |
| A24 | HLA-A*23:03 | 1094 | VFVSNATHWF   | 0,8258 |
| A24 | HLA-A*23:03 | 1101 | HWFVTQRNF    | 0,7845 |
| A24 | HLA-A*23:03 | 1137 | VYDPLQPELDSF | 0,7515 |
| A24 | HLA-A*23:03 | 1208 | QYIKWPWYI    | 0,9638 |
| A24 | HLA-A*23:03 | 1208 | QYIKWPWYIW   | 0,7814 |
| A24 | HLA-A*23:03 | 1211 | KWPWYIWLGF   | 0,6037 |
| A24 | HLA-A*23:03 | 1216 | IWLGFIAGL    | 0,5925 |
| A24 | HLA-A*23:04 | 36   | VYYPDKVF     | 0,9008 |
| A24 | HLA-A*23:04 | 37   | YYPDKVFRSSVL | 0,5679 |
| A24 | HLA-A*23:04 | 57   | PFFSNVTWF    | 0,9013 |
| A24 | HLA-A*23:04 | 77   | KRFDNPVLPF   | 0,6675 |
| A24 | HLA-A*23:04 | 78   | RFDNPVLPF    | 0,9308 |
| A24 | HLA-A*23:04 | 143  | VYYHKNKSW    | 0,7934 |
| A24 | HLA-A*23:04 | 144  | YYHKNKSW     | 0,9179 |
| A24 | HLA-A*23:04 | 151  | SWMESEFRV    | 0,667  |
| A24 | HLA-A*23:04 | 159  | VYSSANNCTF   | 0,9321 |
| A24 | HLA-A*23:04 | 167  | TFEYVSQPF    | 0,5826 |
| A24 | HLA-A*23:04 | 168  | FEYVSQPFLM   | 0,5386 |
| A24 | HLA-A*23:04 | 169  | EYVSQPFLM    | 0,8708 |
| A24 | HLA-A*23:04 | 193  | VFKNIDGYF    | 0,8925 |
| A24 | HLA-A*23:04 | 203  | IYSKHTPINL   | 0,679  |
| A24 | HLA-A*23:04 | 247  | SYLTPGDSSSGW | 0,6431 |
| A24 | HLA-A*23:04 | 264  | AYYVGYLQPRTF | 0,8651 |
| A24 | HLA-A*23:04 | 265  | YYVGYLQPRTF  | 0,926  |
| A24 | HLA-A*23:04 | 265  | YYVGYLQPRTF  | 0,5396 |
| A24 | HLA-A*23:04 | 267  | VGYLQPRTF    | 0,6172 |
| A24 | HLA-A*23:04 | 268  | GYLQPRTF     | 0,7597 |
| A24 | HLA-A*23:04 | 268  | GYLQPRTF     | 0,9029 |
| A24 | HLA-A*23:04 | 268  | GYLQPRTF     | 0,8435 |
| A24 | HLA-A*23:04 | 269  | YLQPRTF      | 0,5793 |
| A24 | HLA-A*23:04 | 312  | IYQTSNFRV    | 0,807  |
| A24 | HLA-A*23:04 | 328  | RFPNITNLCPF  | 0,8874 |
| A24 | HLA-A*23:04 | 345  | TRFASVYAW    | 0,5445 |
| A24 | HLA-A*23:04 | 346  | RFASVYAW     | 0,6882 |
| A24 | HLA-A*23:04 | 368  | LYNSASFSTF   | 0,8917 |
| A24 | HLA-A*23:04 | 395  | VYADSFVI     | 0,5709 |
| A24 | HLA-A*23:04 | 448  | NYNYLYRLF    | 0,8977 |
| A24 | HLA-A*23:04 | 488  | CYFPLQSYGF   | 0,7405 |
| A24 | HLA-A*23:04 | 489  | YFPLQSYGF    | 0,9665 |
| A24 | HLA-A*23:04 | 504  | GYQPYRVVV    | 0,6984 |
| A24 | HLA-A*23:04 | 504  | GYQPYRVVVL   | 0,6433 |
| A24 | HLA-A*23:04 | 504  | GYQPYRVVLSF  | 0,8025 |
| A24 | HLA-A*23:04 | 507  | PYRVVLSF     | 0,8366 |
| A24 | HLA-A*23:04 | 558  | KFLPFQQF     | 0,8975 |
| A24 | HLA-A*23:04 | 634  | RVYSTGSNVF   | 0,7676 |
| A24 | HLA-A*23:04 | 635  | VYSTGSNVF    | 0,9621 |

|     |             |      |              |        |
|-----|-------------|------|--------------|--------|
| A24 | HLA-A*23:04 | 659  | SYECDIPIGAGI | 0,5668 |
| A24 | HLA-A*23:04 | 706  | AYSNNSIAI    | 0,7351 |
| A24 | HLA-A*23:04 | 755  | QYGSFCTQL    | 0,6733 |
| A24 | HLA-A*23:04 | 788  | IYKTPPIKDF   | 0,9258 |
| A24 | HLA-A*23:04 | 816  | SFIEDLLF     | 0,8315 |
| A24 | HLA-A*23:04 | 880  | GTITSGWTF    | 0,6365 |
| A24 | HLA-A*23:04 | 898  | FAMQMAYRF    | 0,5384 |
| A24 | HLA-A*23:04 | 1051 | SFPQSAPHGVVF | 0,7156 |
| A24 | HLA-A*23:04 | 1066 | TYVPAQEKNF   | 0,9578 |
| A24 | HLA-A*23:04 | 1094 | VFVSNGTHW    | 0,9161 |
| A24 | HLA-A*23:04 | 1094 | VFVSNGTHWF   | 0,829  |
| A24 | HLA-A*23:04 | 1101 | HWFVTQRNF    | 0,9099 |
| A24 | HLA-A*23:04 | 1137 | VYDPLQPEL    | 0,9435 |
| A24 | HLA-A*23:04 | 1137 | VYDPLQPELDSF | 0,802  |
| A24 | HLA-A*23:04 | 1147 | SFKEELDKYF   | 0,5695 |
| A24 | HLA-A*23:04 | 1205 | KYEQYIKW     | 0,612  |
| A24 | HLA-A*23:04 | 1208 | QYIKWPWYI    | 0,9656 |
| A24 | HLA-A*23:04 | 1208 | QYIKWPWYIW   | 0,7453 |
| A24 | HLA-A*23:04 | 1211 | KWPWYIWLGF   | 0,7165 |
| A24 | HLA-A*23:04 | 1216 | IWLGFIAGL    | 0,7942 |
| A24 | HLA-A*23:04 | 1219 | GFIAGLIAI    | 0,5361 |
| A24 | HLA-A*23:06 | 57   | PFFSNVTWF    | 0,9141 |
| A24 | HLA-A*23:06 | 78   | RFDNPVLPF    | 0,8396 |
| A24 | HLA-A*23:06 | 143  | VYYHKNNKSW   | 0,7142 |
| A24 | HLA-A*23:06 | 144  | YYHKNNKSW    | 0,8036 |
| A24 | HLA-A*23:06 | 159  | VYSSANNCTF   | 0,917  |
| A24 | HLA-A*23:06 | 169  | EYVSQPFLM    | 0,8499 |
| A24 | HLA-A*23:06 | 193  | VFKNIDGYF    | 0,7818 |
| A24 | HLA-A*23:06 | 203  | IYSKHTPINL   | 0,6028 |
| A24 | HLA-A*23:06 | 264  | AYYVGYLQPRTF | 0,7912 |
| A24 | HLA-A*23:06 | 265  | YYVGYLQPRTF  | 0,879  |
| A24 | HLA-A*23:06 | 268  | GYLQPRTFLL   | 0,7046 |
| A24 | HLA-A*23:06 | 269  | YLQPRTFLL    | 0,5573 |
| A24 | HLA-A*23:06 | 312  | IYQTSNFRV    | 0,6966 |
| A24 | HLA-A*23:06 | 328  | RFPNITNLCPF  | 0,8158 |
| A24 | HLA-A*23:06 | 368  | LYNSASFSTF   | 0,8553 |
| A24 | HLA-A*23:06 | 395  | VYADSFVI     | 0,5149 |
| A24 | HLA-A*23:06 | 448  | NYNYLYRLF    | 0,8881 |
| A24 | HLA-A*23:06 | 488  | CYFPLQSYGF   | 0,6136 |
| A24 | HLA-A*23:06 | 489  | YFPLQSYGF    | 0,9108 |
| A24 | HLA-A*23:06 | 504  | GYQPYRVVLSF  | 0,667  |
| A24 | HLA-A*23:06 | 507  | PYRVVLSF     | 0,8298 |
| A24 | HLA-A*23:06 | 558  | KFLPFQQF     | 0,7881 |
| A24 | HLA-A*23:06 | 634  | RVYSTGSNVF   | 0,5782 |
| A24 | HLA-A*23:06 | 635  | VYSTGSNVF    | 0,934  |
| A24 | HLA-A*23:06 | 788  | IYKTPPIKDF   | 0,9066 |
| A24 | HLA-A*23:06 | 816  | SFIEDLLF     | 0,7909 |
| A24 | HLA-A*23:06 | 880  | GTITSGWTF    | 0,5317 |
| A24 | HLA-A*23:06 | 898  | FAMQMAYRF    | 0,5028 |
| A24 | HLA-A*23:06 | 1066 | TYVPAQEKNF   | 0,9478 |

|     |             |      |              |        |
|-----|-------------|------|--------------|--------|
| A24 | HLA-A*23:06 | 1094 | VFVSNQTHW    | 0,8761 |
| A24 | HLA-A*23:06 | 1094 | VFVSNQTHWF   | 0,8258 |
| A24 | HLA-A*23:06 | 1101 | HWFVTQRNF    | 0,7845 |
| A24 | HLA-A*23:06 | 1137 | VYDPLQPELDSF | 0,7515 |
| A24 | HLA-A*23:06 | 1208 | QYIKWPWYI    | 0,9638 |
| A24 | HLA-A*23:06 | 1208 | QYIKWPWYIW   | 0,7814 |
| A24 | HLA-A*23:06 | 1211 | KWPWYIWLGF   | 0,6037 |
| A24 | HLA-A*23:06 | 1216 | IWLGFIAGL    | 0,5925 |
| A24 | HLA-A*23:10 | 57   | PFFSNVTWF    | 0,8852 |
| A24 | HLA-A*23:10 | 78   | RFDNPVLPF    | 0,8057 |
| A24 | HLA-A*23:10 | 159  | VYSSANNCTF   | 0,8567 |
| A24 | HLA-A*23:10 | 169  | EYVSQPFLM    | 0,8502 |
| A24 | HLA-A*23:10 | 264  | AYYVGYLQPRTF | 0,6408 |
| A24 | HLA-A*23:10 | 265  | YYVGYLQPRTF  | 0,7982 |
| A24 | HLA-A*23:10 | 268  | GYLQPRTFLL   | 0,6349 |
| A24 | HLA-A*23:10 | 269  | YLQPRTFLL    | 0,5339 |
| A24 | HLA-A*23:10 | 312  | IYQTSNFRV    | 0,5674 |
| A24 | HLA-A*23:10 | 328  | RFPNITNLCPF  | 0,6995 |
| A24 | HLA-A*23:10 | 368  | LYNSASFSTF   | 0,7785 |
| A24 | HLA-A*23:10 | 448  | NYNLYRLF     | 0,8162 |
| A24 | HLA-A*23:10 | 488  | CYFPLQSYGF   | 0,5004 |
| A24 | HLA-A*23:10 | 489  | YFPLQSYGF    | 0,8984 |
| A24 | HLA-A*23:10 | 504  | GYQPYRVVLSF  | 0,5485 |
| A24 | HLA-A*23:10 | 507  | PYRVVLSF     | 0,7181 |
| A24 | HLA-A*23:10 | 635  | VYSTGSNVF    | 0,8708 |
| A24 | HLA-A*23:10 | 816  | SFIEDLLF     | 0,7518 |
| A24 | HLA-A*23:10 | 880  | GTITSGWTF    | 0,6006 |
| A24 | HLA-A*23:10 | 898  | FAMQMAYRF    | 0,5102 |
| A24 | HLA-A*23:10 | 1066 | TYVPAQEKNF   | 0,9105 |
| A24 | HLA-A*23:10 | 1094 | VFVSNQTHW    | 0,8044 |
| A24 | HLA-A*23:10 | 1094 | VFVSNQTHWF   | 0,7522 |
| A24 | HLA-A*23:10 | 1101 | HWFVTQRNF    | 0,6918 |
| A24 | HLA-A*23:10 | 1137 | VYDPLQPELDSF | 0,682  |
| A24 | HLA-A*23:10 | 1208 | QYIKWPWYI    | 0,9438 |
| A24 | HLA-A*23:10 | 1208 | QYIKWPWYIW   | 0,6787 |
| A24 | HLA-A*23:10 | 1216 | IWLGFIAGL    | 0,5657 |
| A24 | HLA-A*24:02 | 37   | YYPDKVFRSSVL | 0,601  |
| A24 | HLA-A*24:02 | 57   | PFFSNVTWF    | 0,8728 |
| A24 | HLA-A*24:02 | 78   | RFDNPVLPF    | 0,8538 |
| A24 | HLA-A*24:02 | 143  | VYYHKNNKSW   | 0,7378 |
| A24 | HLA-A*24:02 | 144  | YYHKNNKSW    | 0,8416 |
| A24 | HLA-A*24:02 | 151  | SWMESEFRV    | 0,5046 |
| A24 | HLA-A*24:02 | 159  | VYSSANNCTF   | 0,9582 |
| A24 | HLA-A*24:02 | 167  | TFEYVSQPF    | 0,5365 |
| A24 | HLA-A*24:02 | 169  | EYVSQPFLM    | 0,8484 |
| A24 | HLA-A*24:02 | 203  | IYSKHTPINL   | 0,7085 |
| A24 | HLA-A*24:02 | 264  | AYYVGYLQPRTF | 0,8037 |
| A24 | HLA-A*24:02 | 265  | YYVGYLQPRTF  | 0,9005 |
| A24 | HLA-A*24:02 | 268  | GYLQPRTFLL   | 0,731  |
| A24 | HLA-A*24:02 | 269  | YLQPRTFLL    | 0,5359 |



|     |             |      |              |        |
|-----|-------------|------|--------------|--------|
| A24 | HLA-A*24:02 | 312  | IYQTSNFRV    | 0,785  |
| A24 | HLA-A*24:02 | 328  | RFPNITNLCPF  | 0,8789 |
| A24 | HLA-A*24:02 | 346  | RFASVYAW     | 0,521  |
| A24 | HLA-A*24:02 | 368  | LYNSASFSTF   | 0,914  |
| A24 | HLA-A*24:02 | 395  | VYADSFVI     | 0,6394 |
| A24 | HLA-A*24:02 | 448  | NYNYLYRLF    | 0,9353 |
| A24 | HLA-A*24:02 | 488  | CYFPLQSYGF   | 0,5885 |
| A24 | HLA-A*24:02 | 489  | YFPLQSYGF    | 0,9442 |
| A24 | HLA-A*24:02 | 504  | GYQPYRVVLSF  | 0,6707 |
| A24 | HLA-A*24:02 | 507  | PYRVVLSF     | 0,8166 |
| A24 | HLA-A*24:02 | 558  | KFLPFQQF     | 0,6948 |
| A24 | HLA-A*24:02 | 634  | RVYSTGSNVF   | 0,7146 |
| A24 | HLA-A*24:02 | 635  | VYSTGSNVF    | 0,9696 |
| A24 | HLA-A*24:02 | 755  | QYGSFCTQL    | 0,5614 |
| A24 | HLA-A*24:02 | 788  | IYKTPPIKDF   | 0,9226 |
| A24 | HLA-A*24:02 | 816  | SFIEDLLF     | 0,7253 |
| A24 | HLA-A*24:02 | 1066 | TYVPAQEKNF   | 0,9479 |
| A24 | HLA-A*24:02 | 1094 | VFVSNGTHW    | 0,8658 |
| A24 | HLA-A*24:02 | 1094 | VFVSNGTHWF   | 0,8335 |
| A24 | HLA-A*24:02 | 1101 | HWFVTQRNF    | 0,754  |
| A24 | HLA-A*24:02 | 1137 | VYDPLQPELDSF | 0,8174 |
| A24 | HLA-A*24:02 | 1208 | QYIKWPWYI    | 0,9613 |
| A24 | HLA-A*24:02 | 1208 | QYIKWPWYIW   | 0,7582 |
| A24 | HLA-A*24:02 | 1211 | KWPWYIWLGF   | 0,6582 |
| A24 | HLA-A*24:03 | 36   | VYYPDKVF     | 0,8969 |
| A24 | HLA-A*24:03 | 37   | YYPDKVFRSSVL | 0,7149 |
| A24 | HLA-A*24:03 | 57   | PFFSNVTWF    | 0,8822 |
| A24 | HLA-A*24:03 | 77   | KRFDNPVLPF   | 0,6134 |
| A24 | HLA-A*24:03 | 78   | RFDNPVLPF    | 0,9523 |
| A24 | HLA-A*24:03 | 143  | VYYHKNNKSW   | 0,8351 |
| A24 | HLA-A*24:03 | 144  | YYHKNNKSW    | 0,9523 |
| A24 | HLA-A*24:03 | 151  | SWMESEFRV    | 0,7048 |
| A24 | HLA-A*24:03 | 159  | VYSSANNCTF   | 0,9732 |
| A24 | HLA-A*24:03 | 167  | TFEYVSQPF    | 0,6889 |
| A24 | HLA-A*24:03 | 169  | EYVSQPFLM    | 0,8798 |
| A24 | HLA-A*24:03 | 193  | VFKNIDGYF    | 0,8984 |
| A24 | HLA-A*24:03 | 203  | IYSKHTPINL   | 0,8029 |
| A24 | HLA-A*24:03 | 247  | SYLTPGDSSSGW | 0,7197 |
| A24 | HLA-A*24:03 | 264  | AYYVGYLQPRTF | 0,8966 |
| A24 | HLA-A*24:03 | 265  | YYVGYLQPRTF  | 0,9506 |
| A24 | HLA-A*24:03 | 265  | YYVGYLQPRTF  | 0,6242 |
| A24 | HLA-A*24:03 | 267  | VGYLQPRTF    | 0,7184 |
| A24 | HLA-A*24:03 | 268  | GYLQPRTF     | 0,7874 |
| A24 | HLA-A*24:03 | 268  | GYLQPRTF     | 0,9337 |
| A24 | HLA-A*24:03 | 268  | GYLQPRTFLL   | 0,8923 |
| A24 | HLA-A*24:03 | 312  | IYQTSNFRV    | 0,8841 |
| A24 | HLA-A*24:03 | 328  | RFPNITNLCPF  | 0,9389 |
| A24 | HLA-A*24:03 | 346  | RFASVYAW     | 0,7335 |
| A24 | HLA-A*24:03 | 350  | VYAWNKRRI    | 0,6686 |
| A24 | HLA-A*24:03 | 368  | LYNSASFSTF   | 0,9453 |

|     |             |      |              |        |
|-----|-------------|------|--------------|--------|
| A24 | HLA-A*24:03 | 379  | CYGVSPTKL    | 0,6202 |
| A24 | HLA-A*24:03 | 395  | VYADSFVI     | 0,6956 |
| A24 | HLA-A*24:03 | 448  | NYNLYRLF     | 0,9379 |
| A24 | HLA-A*24:03 | 488  | CYFPLQSYGF   | 0,7404 |
| A24 | HLA-A*24:03 | 489  | YFPLQSYGF    | 0,9778 |
| A24 | HLA-A*24:03 | 504  | GYQPYRVVV    | 0,7982 |
| A24 | HLA-A*24:03 | 504  | GYQPYRVVVL   | 0,7444 |
| A24 | HLA-A*24:03 | 504  | GYQPYRVVLSF  | 0,8581 |
| A24 | HLA-A*24:03 | 507  | PYRVVLSF     | 0,8533 |
| A24 | HLA-A*24:03 | 558  | KFLPFQF      | 0,8636 |
| A24 | HLA-A*24:03 | 632  | TWRVYSTGSNVF | 0,5957 |
| A24 | HLA-A*24:03 | 634  | RVYSTGSNVF   | 0,8822 |
| A24 | HLA-A*24:03 | 635  | VYSTGSNVF    | 0,9872 |
| A24 | HLA-A*24:03 | 659  | SYECDIPIGAGI | 0,6187 |
| A24 | HLA-A*24:03 | 706  | AYSNNSIAI    | 0,8828 |
| A24 | HLA-A*24:03 | 755  | QYGSFCTQL    | 0,7929 |
| A24 | HLA-A*24:03 | 788  | IYKTPPIKDF   | 0,9538 |
| A24 | HLA-A*24:03 | 816  | SFIEDLLF     | 0,8244 |
| A24 | HLA-A*24:03 | 1051 | SFPQSAPHGVVF | 0,8397 |
| A24 | HLA-A*24:03 | 1066 | TYVPAQEKNF   | 0,97   |
| A24 | HLA-A*24:03 | 1094 | VFVSNGTHW    | 0,9343 |
| A24 | HLA-A*24:03 | 1094 | VFVSNGTHWF   | 0,8723 |
| A24 | HLA-A*24:03 | 1101 | HWFVTQRNF    | 0,9047 |
| A24 | HLA-A*24:03 | 1137 | VYDPLQPEL    | 0,9496 |
| A24 | HLA-A*24:03 | 1137 | VYDPLQPELDSF | 0,8822 |
| A24 | HLA-A*24:03 | 1147 | SFKEELDKYF   | 0,6438 |
| A24 | HLA-A*24:03 | 1205 | KYEQYIKW     | 0,6328 |
| A24 | HLA-A*24:03 | 1208 | QYIKWPWYI    | 0,9753 |
| A24 | HLA-A*24:03 | 1208 | QYIKWPWYIW   | 0,7703 |
| A24 | HLA-A*24:03 | 1211 | KWPWYIWLGF   | 0,7747 |
| A24 | HLA-A*24:03 | 1216 | IWLGFIAGL    | 0,7773 |
| A24 | HLA-A*24:05 | 37   | YYPDKVFRSSVL | 0,601  |
| A24 | HLA-A*24:05 | 57   | PFFSNVTWF    | 0,8728 |
| A24 | HLA-A*24:05 | 78   | RFDNPVLPF    | 0,8538 |
| A24 | HLA-A*24:05 | 143  | VYYHKNNKSW   | 0,7378 |
| A24 | HLA-A*24:05 | 144  | YYHKNNKSW    | 0,8416 |
| A24 | HLA-A*24:05 | 151  | SWMESEFRV    | 0,5046 |
| A24 | HLA-A*24:05 | 159  | VYSSANNCTF   | 0,9582 |
| A24 | HLA-A*24:05 | 167  | TFEYVSQPF    | 0,5365 |
| A24 | HLA-A*24:05 | 169  | EYVSQPFLM    | 0,8484 |
| A24 | HLA-A*24:05 | 203  | IYSKHTPINL   | 0,7085 |
| A24 | HLA-A*24:05 | 264  | AYYVGYLQPRTF | 0,8037 |
| A24 | HLA-A*24:05 | 265  | YYVGYLQPRTF  | 0,9005 |
| A24 | HLA-A*24:05 | 268  | GYLQPRTFLL   | 0,731  |
| A24 | HLA-A*24:05 | 269  | YLQPRTFLL    | 0,5359 |
| A24 | HLA-A*24:05 | 312  | IYQTSNFRV    | 0,785  |
| A24 | HLA-A*24:05 | 328  | RFPNITNLCPF  | 0,8789 |
| A24 | HLA-A*24:05 | 346  | RFASVYAW     | 0,521  |
| A24 | HLA-A*24:05 | 368  | LYNSASFSTF   | 0,914  |
| A24 | HLA-A*24:05 | 395  | VYADSFVI     | 0,6394 |

|     |             |      |              |        |
|-----|-------------|------|--------------|--------|
| A24 | HLA-A*24:05 | 448  | NYNLYRLF     | 0,9353 |
| A24 | HLA-A*24:05 | 488  | CYFPLQSYGF   | 0,5885 |
| A24 | HLA-A*24:05 | 489  | YFPLQSYGF    | 0,9442 |
| A24 | HLA-A*24:05 | 504  | GYQPYRVVLSF  | 0,6707 |
| A24 | HLA-A*24:05 | 507  | PYRVVLSF     | 0,8166 |
| A24 | HLA-A*24:05 | 558  | KFLPFQQF     | 0,6948 |
| A24 | HLA-A*24:05 | 634  | RVYSTGSNVF   | 0,7146 |
| A24 | HLA-A*24:05 | 635  | VYSTGSNVF    | 0,9696 |
| A24 | HLA-A*24:05 | 755  | QYGSFCTQL    | 0,5614 |
| A24 | HLA-A*24:05 | 788  | IYKTPPIKDF   | 0,9226 |
| A24 | HLA-A*24:05 | 816  | SFIEDLLF     | 0,7253 |
| A24 | HLA-A*24:05 | 1066 | TYVPAQEKNF   | 0,9479 |
| A24 | HLA-A*24:05 | 1094 | VFVSNNGTHW   | 0,8658 |
| A24 | HLA-A*24:05 | 1094 | VFVSNNGTHWF  | 0,8335 |
| A24 | HLA-A*24:05 | 1101 | HWFVTQRNF    | 0,754  |
| A24 | HLA-A*24:05 | 1137 | VYDPLQPELDSF | 0,8174 |
| A24 | HLA-A*24:05 | 1208 | QYIKWPWYI    | 0,9613 |
| A24 | HLA-A*24:05 | 1208 | QYIKWPWYIW   | 0,7582 |
| A24 | HLA-A*24:05 | 1211 | KWPWYIWLGF   | 0,6582 |
| A24 | HLA-A*24:06 | 57   | PFFSNVTWF    | 0,8811 |
| A24 | HLA-A*24:06 | 143  | VYYHKNNKSW   | 0,7728 |
| A24 | HLA-A*24:06 | 144  | YYHKNNKSW    | 0,8613 |
| A24 | HLA-A*24:06 | 159  | VYSSANNCTF   | 0,9503 |
| A24 | HLA-A*24:06 | 169  | EYVSQPFLM    | 0,8797 |
| A24 | HLA-A*24:06 | 193  | VFKNIDGYF    | 0,8456 |
| A24 | HLA-A*24:06 | 203  | IYSKHTPINL   | 0,6962 |
| A24 | HLA-A*24:06 | 264  | AYYVGYLQPRTF | 0,759  |
| A24 | HLA-A*24:06 | 265  | YYVGYLQPRTF  | 0,9004 |
| A24 | HLA-A*24:06 | 268  | GYLQPRTFLL   | 0,6697 |
| A24 | HLA-A*24:06 | 269  | YLQPRTFLL    | 0,5368 |
| A24 | HLA-A*24:06 | 312  | IYQTSNFRV    | 0,6415 |
| A24 | HLA-A*24:06 | 328  | RFPNITNLCPF  | 0,8669 |
| A24 | HLA-A*24:06 | 368  | LYNSASFSTF   | 0,901  |
| A24 | HLA-A*24:06 | 448  | NYNLYRLF     | 0,9202 |
| A24 | HLA-A*24:06 | 488  | CYFPLQSYGF   | 0,6273 |
| A24 | HLA-A*24:06 | 489  | YFPLQSYGF    | 0,9384 |
| A24 | HLA-A*24:06 | 504  | GYQPYRVVLSF  | 0,6274 |
| A24 | HLA-A*24:06 | 507  | PYRVVLSF     | 0,8272 |
| A24 | HLA-A*24:06 | 634  | RVYSTGSNVF   | 0,7093 |
| A24 | HLA-A*24:06 | 635  | VYSTGSNVF    | 0,9475 |
| A24 | HLA-A*24:06 | 755  | QYGSFCTQL    | 0,5573 |
| A24 | HLA-A*24:06 | 788  | IYKTPPIKDF   | 0,9187 |
| A24 | HLA-A*24:06 | 1066 | TYVPAQEKNF   | 0,9671 |
| A24 | HLA-A*24:06 | 1094 | VFVSNNGTHW   | 0,8829 |
| A24 | HLA-A*24:06 | 1094 | VFVSNNGTHWF  | 0,8701 |
| A24 | HLA-A*24:06 | 1101 | HWFVTQRNF    | 0,7966 |
| A24 | HLA-A*24:06 | 1208 | QYIKWPWYI    | 0,9423 |
| A24 | HLA-A*24:06 | 1208 | QYIKWPWYIW   | 0,7679 |
| A24 | HLA-A*24:06 | 1211 | KWPWYIWLGF   | 0,5976 |
| A24 | HLA-A*24:08 | 144  | YYHKNNKSW    | 0,7358 |

|     |             |      |              |        |
|-----|-------------|------|--------------|--------|
| A24 | HLA-A*24:08 | 159  | VYSSANNCTF   | 0,8525 |
| A24 | HLA-A*24:08 | 265  | YYVGYLQPRTF  | 0,757  |
| A24 | HLA-A*24:08 | 268  | GYLQPRTFLL   | 0,6018 |
| A24 | HLA-A*24:08 | 269  | YLQPRTFLL    | 0,6645 |
| A24 | HLA-A*24:08 | 312  | IYQTSNFRV    | 0,6407 |
| A24 | HLA-A*24:08 | 328  | RFPNITNLCPF  | 0,7387 |
| A24 | HLA-A*24:08 | 368  | LYNSASFSTF   | 0,7867 |
| A24 | HLA-A*24:08 | 448  | NYNLYRLF     | 0,827  |
| A24 | HLA-A*24:08 | 489  | YFPLQSYGF    | 0,8868 |
| A24 | HLA-A*24:08 | 635  | VYSTGSNVF    | 0,8901 |
| A24 | HLA-A*24:08 | 1094 | VFVSNGTHWF   | 0,7487 |
| A24 | HLA-A*24:08 | 1208 | QYIKWPWYI    | 0,9046 |
| A24 | HLA-A*24:08 | 1208 | QYIKWPWYIW   | 0,6181 |
| A24 | HLA-A*24:10 | 23   | QLPPAYTNSF   | 0,6067 |
| A24 | HLA-A*24:10 | 36   | VYYPDKVF     | 0,8127 |
| A24 | HLA-A*24:10 | 37   | YYPDKVFRSSVL | 0,7336 |
| A24 | HLA-A*24:10 | 57   | PFFSNVTWF    | 0,8735 |
| A24 | HLA-A*24:10 | 77   | KRFDNPVLPF   | 0,571  |
| A24 | HLA-A*24:10 | 78   | RFDNPVLPF    | 0,9417 |
| A24 | HLA-A*24:10 | 143  | VYYHKNKSW    | 0,6813 |
| A24 | HLA-A*24:10 | 144  | YYHKNKSW     | 0,898  |
| A24 | HLA-A*24:10 | 151  | SWMESEFRV    | 0,7017 |
| A24 | HLA-A*24:10 | 159  | VYSSANNCTF   | 0,9516 |
| A24 | HLA-A*24:10 | 167  | TFEYVSQPF    | 0,6744 |
| A24 | HLA-A*24:10 | 168  | FEYVSQPFLM   | 0,5891 |
| A24 | HLA-A*24:10 | 169  | EYVSQPFLM    | 0,8711 |
| A24 | HLA-A*24:10 | 193  | VFKNIDGYF    | 0,8319 |
| A24 | HLA-A*24:10 | 203  | IYSKHTPINL   | 0,7032 |
| A24 | HLA-A*24:10 | 247  | SYLTPGDSSSGW | 0,6388 |
| A24 | HLA-A*24:10 | 264  | AYVGYLQPRTF  | 0,8043 |
| A24 | HLA-A*24:10 | 265  | YYVGYLQPRTF  | 0,8996 |
| A24 | HLA-A*24:10 | 265  | YYVGYLQPRTFL | 0,5933 |
| A24 | HLA-A*24:10 | 267  | VGYLQPRTFL   | 0,6401 |
| A24 | HLA-A*24:10 | 268  | GYLQPRTF     | 0,6374 |
| A24 | HLA-A*24:10 | 268  | GYLQPRTFL    | 0,8962 |
| A24 | HLA-A*24:10 | 268  | GYLQPRTFLL   | 0,8395 |
| A24 | HLA-A*24:10 | 269  | YLQPRTFLL    | 0,5904 |
| A24 | HLA-A*24:10 | 312  | IYQTSNFRV    | 0,8099 |
| A24 | HLA-A*24:10 | 328  | RFPNITNLCPF  | 0,8972 |
| A24 | HLA-A*24:10 | 346  | RFASVYAW     | 0,5964 |
| A24 | HLA-A*24:10 | 368  | LYNSASFSTF   | 0,9153 |
| A24 | HLA-A*24:10 | 395  | VYADSFVI     | 0,6432 |
| A24 | HLA-A*24:10 | 448  | NYNLYRLF     | 0,9031 |
| A24 | HLA-A*24:10 | 488  | CYFPLQSYGF   | 0,6933 |
| A24 | HLA-A*24:10 | 489  | YFPLQSYGF    | 0,9707 |
| A24 | HLA-A*24:10 | 504  | GYQPYRVVV    | 0,6833 |
| A24 | HLA-A*24:10 | 504  | GYQPYRVVVL   | 0,6625 |
| A24 | HLA-A*24:10 | 504  | GYQPYRVVLSF  | 0,7723 |
| A24 | HLA-A*24:10 | 507  | PYRVVLSF     | 0,7928 |
| A24 | HLA-A*24:10 | 558  | KFLPFQF      | 0,7572 |

|     |             |      |              |        |
|-----|-------------|------|--------------|--------|
| A24 | HLA-A*24:10 | 634  | RVYSTGSNVF   | 0,7497 |
| A24 | HLA-A*24:10 | 635  | VYSTGSNVF    | 0,9761 |
| A24 | HLA-A*24:10 | 659  | SYECDIPIGAGI | 0,5966 |
| A24 | HLA-A*24:10 | 706  | AYSNNSIAI    | 0,8424 |
| A24 | HLA-A*24:10 | 755  | QYGSFCTQL    | 0,7571 |
| A24 | HLA-A*24:10 | 788  | IYKTPPIKDF   | 0,8924 |
| A24 | HLA-A*24:10 | 816  | SFIEDLLF     | 0,8218 |
| A24 | HLA-A*24:10 | 880  | GTITSGWTF    | 0,6067 |
| A24 | HLA-A*24:10 | 1051 | SFPQSAPHGVVF | 0,8219 |
| A24 | HLA-A*24:10 | 1066 | TYVPAQEKNF   | 0,9499 |
| A24 | HLA-A*24:10 | 1094 | VFVSNGTHW    | 0,8862 |
| A24 | HLA-A*24:10 | 1094 | VFVSNGTHWF   | 0,8275 |
| A24 | HLA-A*24:10 | 1101 | HWFVTQRNF    | 0,8486 |
| A24 | HLA-A*24:10 | 1137 | VYDPLQPEL    | 0,9463 |
| A24 | HLA-A*24:10 | 1137 | VYDPLQPELDSF | 0,8552 |
| A24 | HLA-A*24:10 | 1147 | SFKEELDKYF   | 0,621  |
| A24 | HLA-A*24:10 | 1208 | QYIKWPWYI    | 0,9619 |
| A24 | HLA-A*24:10 | 1208 | QYIKWPWYIW   | 0,6962 |
| A24 | HLA-A*24:10 | 1211 | KWPWYIWLGF   | 0,6791 |
| A24 | HLA-A*24:10 | 1216 | IWLGFIAGL    | 0,748  |
| A24 | HLA-A*24:13 | 57   | PFFSNVTWF    | 0,9141 |
| A24 | HLA-A*24:13 | 78   | RFDNPVLPF    | 0,8396 |
| A24 | HLA-A*24:13 | 143  | VYYHKNNKSW   | 0,7142 |
| A24 | HLA-A*24:13 | 144  | YYHKNNKSW    | 0,8036 |
| A24 | HLA-A*24:13 | 159  | VYSSANNCTF   | 0,917  |
| A24 | HLA-A*24:13 | 169  | EYVSQPFLM    | 0,8499 |
| A24 | HLA-A*24:13 | 193  | VFKNIDGYF    | 0,7818 |
| A24 | HLA-A*24:13 | 203  | IYSKHTPINL   | 0,6028 |
| A24 | HLA-A*24:13 | 264  | AYYVGYLQPRTF | 0,7912 |
| A24 | HLA-A*24:13 | 265  | YYVGYLQPRTF  | 0,879  |
| A24 | HLA-A*24:13 | 268  | GYLQPRTFLL   | 0,7046 |
| A24 | HLA-A*24:13 | 269  | YLQPRTFLL    | 0,5573 |
| A24 | HLA-A*24:13 | 312  | IYQTSNFRV    | 0,6966 |
| A24 | HLA-A*24:13 | 328  | RFPNITNLCPF  | 0,8158 |
| A24 | HLA-A*24:13 | 368  | LYNSASFSTF   | 0,8553 |
| A24 | HLA-A*24:13 | 395  | VYADSFVI     | 0,5149 |
| A24 | HLA-A*24:13 | 448  | NYNYLYRLF    | 0,8881 |
| A24 | HLA-A*24:13 | 488  | CYFPLQSYGF   | 0,6136 |
| A24 | HLA-A*24:13 | 489  | YFPLQSYGF    | 0,9108 |
| A24 | HLA-A*24:13 | 504  | GYQPYRVVLSF  | 0,667  |
| A24 | HLA-A*24:13 | 507  | PYRVVLSF     | 0,8298 |
| A24 | HLA-A*24:13 | 558  | KFLPFQQF     | 0,7881 |
| A24 | HLA-A*24:13 | 634  | RVYSTGSNVF   | 0,5782 |
| A24 | HLA-A*24:13 | 635  | VYSTGSNVF    | 0,934  |
| A24 | HLA-A*24:13 | 788  | IYKTPPIKDF   | 0,9066 |
| A24 | HLA-A*24:13 | 816  | SFIEDLLF     | 0,7909 |
| A24 | HLA-A*24:13 | 880  | GTITSGWTF    | 0,5317 |
| A24 | HLA-A*24:13 | 898  | FAMQMAYRF    | 0,5028 |
| A24 | HLA-A*24:13 | 1066 | TYVPAQEKNF   | 0,9478 |
| A24 | HLA-A*24:13 | 1094 | VFVSNGTHW    | 0,8761 |

|     |             |      |              |        |
|-----|-------------|------|--------------|--------|
| A24 | HLA-A*24:13 | 1094 | VFVSNNGTHWF  | 0,8258 |
| A24 | HLA-A*24:13 | 1101 | HWFVTQRNF    | 0,7845 |
| A24 | HLA-A*24:13 | 1137 | VYDPLQPELDSF | 0,7515 |
| A24 | HLA-A*24:13 | 1208 | QYIKWPWYI    | 0,9638 |
| A24 | HLA-A*24:13 | 1208 | QYIKWPWYIW   | 0,7814 |
| A24 | HLA-A*24:13 | 1211 | KWPWYIWLGF   | 0,6037 |
| A24 | HLA-A*24:13 | 1216 | IWLGFIAGL    | 0,5925 |
| A24 | HLA-A*24:18 | 36   | VYYPDKVF     | 0,8173 |
| A24 | HLA-A*24:18 | 57   | PFFSNVTWF    | 0,7076 |
| A24 | HLA-A*24:18 | 77   | KRFDNPVLPF   | 0,5982 |
| A24 | HLA-A*24:18 | 78   | RFDNPVLPF    | 0,8452 |
| A24 | HLA-A*24:18 | 143  | VYYHKNNKSW   | 0,6438 |
| A24 | HLA-A*24:18 | 144  | YYHKNNKSW    | 0,7986 |
| A24 | HLA-A*24:18 | 159  | VYSSANNCTF   | 0,8212 |
| A24 | HLA-A*24:18 | 169  | EYVSQPFLM    | 0,6396 |
| A24 | HLA-A*24:18 | 193  | VFKNIDGYF    | 0,8479 |
| A24 | HLA-A*24:18 | 203  | IYSKHTPINL   | 0,5908 |
| A24 | HLA-A*24:18 | 264  | AYYVGYLQPRTF | 0,7906 |
| A24 | HLA-A*24:18 | 265  | YYVGYLQPRTF  | 0,7951 |
| A24 | HLA-A*24:18 | 267  | VGYLQPRTF    | 0,5749 |
| A24 | HLA-A*24:18 | 268  | GYLQPRTF     | 0,7049 |
| A24 | HLA-A*24:18 | 268  | GYLQPRTF     | 0,8826 |
| A24 | HLA-A*24:18 | 268  | GYLQPRTFLL   | 0,7029 |
| A24 | HLA-A*24:18 | 312  | IYQTSNFRV    | 0,625  |
| A24 | HLA-A*24:18 | 328  | RFPNITNLCPF  | 0,6955 |
| A24 | HLA-A*24:18 | 350  | VYAWNRKRI    | 0,5642 |
| A24 | HLA-A*24:18 | 368  | LYNSASFSTF   | 0,7395 |
| A24 | HLA-A*24:18 | 448  | NYNLYRLF     | 0,8086 |
| A24 | HLA-A*24:18 | 488  | CYFPLQSYGF   | 0,5236 |
| A24 | HLA-A*24:18 | 489  | YFPLQSYGF    | 0,8335 |
| A24 | HLA-A*24:18 | 504  | GYQPYRVVV    | 0,659  |
| A24 | HLA-A*24:18 | 504  | GYQPYRVVVL   | 0,5063 |
| A24 | HLA-A*24:18 | 504  | GYQPYRVVLSF  | 0,6043 |
| A24 | HLA-A*24:18 | 507  | PYRVVLSF     | 0,7472 |
| A24 | HLA-A*24:18 | 558  | KFLPFQQF     | 0,7919 |
| A24 | HLA-A*24:18 | 634  | RVYSTGSNVF   | 0,6968 |
| A24 | HLA-A*24:18 | 635  | VYSTGSNVF    | 0,9155 |
| A24 | HLA-A*24:18 | 706  | AYSNNSIAI    | 0,6343 |
| A24 | HLA-A*24:18 | 755  | QYGSFCTQL    | 0,5402 |
| A24 | HLA-A*24:18 | 788  | IYKTPPIKDF   | 0,8671 |
| A24 | HLA-A*24:18 | 1066 | TYVPAQEKNF   | 0,7987 |
| A24 | HLA-A*24:18 | 1094 | VFVSNNGTHW   | 0,7787 |
| A24 | HLA-A*24:18 | 1094 | VFVSNNGTHWF  | 0,6654 |
| A24 | HLA-A*24:18 | 1101 | HWFVTQRNF    | 0,8544 |
| A24 | HLA-A*24:18 | 1137 | VYDPLQPEL    | 0,8216 |
| A24 | HLA-A*24:18 | 1208 | QYIKWPWYI    | 0,8782 |
| A24 | HLA-A*24:18 | 1211 | KWPWYIWLGF   | 0,5123 |
| A24 | HLA-A*24:18 | 1216 | IWLGFIAGL    | 0,7231 |
| A24 | HLA-A*24:20 | 37   | YYPDKVFRSSVL | 0,601  |
| A24 | HLA-A*24:20 | 57   | PFFSNVTWF    | 0,8728 |

|     |             |      |              |        |
|-----|-------------|------|--------------|--------|
| A24 | HLA-A*24:20 | 78   | RFDNPVLPF    | 0,8538 |
| A24 | HLA-A*24:20 | 143  | VYYHKNNKSW   | 0,7378 |
| A24 | HLA-A*24:20 | 144  | YYHKNNKSW    | 0,8416 |
| A24 | HLA-A*24:20 | 151  | SWMESEFRV    | 0,5046 |
| A24 | HLA-A*24:20 | 159  | VYSSANNCTF   | 0,9582 |
| A24 | HLA-A*24:20 | 167  | TFEYVSQPF    | 0,5365 |
| A24 | HLA-A*24:20 | 169  | EYVSQPFLM    | 0,8484 |
| A24 | HLA-A*24:20 | 203  | IYSKHTPINL   | 0,7085 |
| A24 | HLA-A*24:20 | 264  | AYYVGYLQPRTF | 0,8037 |
| A24 | HLA-A*24:20 | 265  | YYVGYLQPRTF  | 0,9005 |
| A24 | HLA-A*24:20 | 268  | GYLQPRTFLL   | 0,731  |
| A24 | HLA-A*24:20 | 269  | YLQPRTFLL    | 0,5359 |
| A24 | HLA-A*24:20 | 312  | IYQTSNFRV    | 0,785  |
| A24 | HLA-A*24:20 | 328  | RFPNITNLCPF  | 0,8789 |
| A24 | HLA-A*24:20 | 346  | RFASVYAW     | 0,521  |
| A24 | HLA-A*24:20 | 368  | LYNSASFSTF   | 0,914  |
| A24 | HLA-A*24:20 | 395  | VYADSFVI     | 0,6394 |
| A24 | HLA-A*24:20 | 448  | NYNLYRLF     | 0,9353 |
| A24 | HLA-A*24:20 | 488  | CYFPLQSYGF   | 0,5885 |
| A24 | HLA-A*24:20 | 489  | YFPLQSYGF    | 0,9442 |
| A24 | HLA-A*24:20 | 504  | GYQPYRVVLSF  | 0,6707 |
| A24 | HLA-A*24:20 | 507  | PYRVVLSF     | 0,8166 |
| A24 | HLA-A*24:20 | 558  | KFLPFQQF     | 0,6948 |
| A24 | HLA-A*24:20 | 634  | RVYSTGSNVF   | 0,7146 |
| A24 | HLA-A*24:20 | 635  | VYSTGSNVF    | 0,9696 |
| A24 | HLA-A*24:20 | 755  | QYGSFCTQL    | 0,5614 |
| A24 | HLA-A*24:20 | 788  | IYKTPPIKDF   | 0,9226 |
| A24 | HLA-A*24:20 | 816  | SFIEDLLF     | 0,7253 |
| A24 | HLA-A*24:20 | 1066 | TYVPAQEKNF   | 0,9479 |
| A24 | HLA-A*24:20 | 1094 | VFVSNGTHW    | 0,8658 |
| A24 | HLA-A*24:20 | 1094 | VFVSNGTHWF   | 0,8335 |
| A24 | HLA-A*24:20 | 1101 | HWFVTQRNF    | 0,754  |
| A24 | HLA-A*24:20 | 1137 | VYDPLQPELDSF | 0,8174 |
| A24 | HLA-A*24:20 | 1208 | QYIKWPWYI    | 0,9613 |
| A24 | HLA-A*24:20 | 1208 | QYIKWPWYIW   | 0,7582 |
| A24 | HLA-A*24:20 | 1211 | KWPWYIWLGF   | 0,6582 |
| A24 | HLA-A*24:21 | 37   | YYPDKVFRSSVL | 0,601  |
| A24 | HLA-A*24:21 | 57   | PFFSNVTWF    | 0,8728 |
| A24 | HLA-A*24:21 | 78   | RFDNPVLPF    | 0,8538 |
| A24 | HLA-A*24:21 | 143  | VYYHKNNKSW   | 0,7378 |
| A24 | HLA-A*24:21 | 144  | YYHKNNKSW    | 0,8416 |
| A24 | HLA-A*24:21 | 151  | SWMESEFRV    | 0,5046 |
| A24 | HLA-A*24:21 | 159  | VYSSANNCTF   | 0,9582 |
| A24 | HLA-A*24:21 | 167  | TFEYVSQPF    | 0,5365 |
| A24 | HLA-A*24:21 | 169  | EYVSQPFLM    | 0,8484 |
| A24 | HLA-A*24:21 | 203  | IYSKHTPINL   | 0,7085 |
| A24 | HLA-A*24:21 | 264  | AYYVGYLQPRTF | 0,8037 |
| A24 | HLA-A*24:21 | 265  | YYVGYLQPRTF  | 0,9005 |
| A24 | HLA-A*24:21 | 268  | GYLQPRTFLL   | 0,731  |
| A24 | HLA-A*24:21 | 269  | YLQPRTFLL    | 0,5359 |

|     |             |      |              |        |
|-----|-------------|------|--------------|--------|
| A24 | HLA-A*24:21 | 312  | IYQTSNFRV    | 0,785  |
| A24 | HLA-A*24:21 | 328  | RFPNITNLCPF  | 0,8789 |
| A24 | HLA-A*24:21 | 346  | RFASVYAW     | 0,521  |
| A24 | HLA-A*24:21 | 368  | LYNSASFSTF   | 0,914  |
| A24 | HLA-A*24:21 | 395  | VYADSFVI     | 0,6394 |
| A24 | HLA-A*24:21 | 448  | NYNLYRLF     | 0,9353 |
| A24 | HLA-A*24:21 | 488  | CYFPLQSYGF   | 0,5885 |
| A24 | HLA-A*24:21 | 489  | YFPLQSYGF    | 0,9442 |
| A24 | HLA-A*24:21 | 504  | GYQPYRVVLSF  | 0,6707 |
| A24 | HLA-A*24:21 | 507  | PYRVVLSF     | 0,8166 |
| A24 | HLA-A*24:21 | 558  | KFLPFQQF     | 0,6948 |
| A24 | HLA-A*24:21 | 634  | RVYSTGSNVF   | 0,7146 |
| A24 | HLA-A*24:21 | 635  | VYSTGSNVF    | 0,9696 |
| A24 | HLA-A*24:21 | 755  | QYGSFCTQL    | 0,5614 |
| A24 | HLA-A*24:21 | 788  | IYKTPPIKDF   | 0,9226 |
| A24 | HLA-A*24:21 | 816  | SFIEDLLF     | 0,7253 |
| A24 | HLA-A*24:21 | 1066 | TYVPAQEKNF   | 0,9479 |
| A24 | HLA-A*24:21 | 1094 | VFVSNGTHW    | 0,8658 |
| A24 | HLA-A*24:21 | 1094 | VFVSNGTHWF   | 0,8335 |
| A24 | HLA-A*24:21 | 1101 | HWFVTQRNF    | 0,754  |
| A24 | HLA-A*24:21 | 1137 | VYDPLQPELDSF | 0,8174 |
| A24 | HLA-A*24:21 | 1208 | QYIKWPWYI    | 0,9613 |
| A24 | HLA-A*24:21 | 1208 | QYIKWPWYIW   | 0,7582 |
| A24 | HLA-A*24:21 | 1211 | KWPWYIWLGF   | 0,6582 |
| A24 | HLA-A*24:22 | 23   | QLPPAYTNSF   | 0,6934 |
| A24 | HLA-A*24:22 | 36   | VYYPDKVF     | 0,8478 |
| A24 | HLA-A*24:22 | 37   | YYPDKVFRSSVL | 0,692  |
| A24 | HLA-A*24:22 | 47   | VLHSTQDLF    | 0,6614 |
| A24 | HLA-A*24:22 | 57   | PFFSNVTWF    | 0,8749 |
| A24 | HLA-A*24:22 | 77   | KRFDNPVLPF   | 0,6655 |
| A24 | HLA-A*24:22 | 78   | RFDNPVLPF    | 0,861  |
| A24 | HLA-A*24:22 | 143  | VYYHKNNKSW   | 0,8066 |
| A24 | HLA-A*24:22 | 144  | YYHKNNKSW    | 0,9429 |
| A24 | HLA-A*24:22 | 151  | SWMESEFRV    | 0,6473 |
| A24 | HLA-A*24:22 | 159  | VYSSANNCTF   | 0,9584 |
| A24 | HLA-A*24:22 | 167  | TFEYVSQPF    | 0,6382 |
| A24 | HLA-A*24:22 | 169  | EYVSQPFLM    | 0,8978 |
| A24 | HLA-A*24:22 | 193  | VFKNIDGYF    | 0,9224 |
| A24 | HLA-A*24:22 | 203  | IYSKHTPINL   | 0,7532 |
| A24 | HLA-A*24:22 | 247  | SYLTPGDSSSGW | 0,7072 |
| A24 | HLA-A*24:22 | 264  | AYYVGYLQPRTF | 0,8149 |
| A24 | HLA-A*24:22 | 265  | YYVGYLQPRTF  | 0,9218 |
| A24 | HLA-A*24:22 | 268  | GYLQPRTFLL   | 0,8871 |
| A24 | HLA-A*24:22 | 268  | GYLQPRTFLL   | 0,7943 |
| A24 | HLA-A*24:22 | 269  | YLQPRTFLL    | 0,6428 |
| A24 | HLA-A*24:22 | 312  | IYQTSNFRV    | 0,7597 |
| A24 | HLA-A*24:22 | 328  | RFPNITNLCPF  | 0,8917 |
| A24 | HLA-A*24:22 | 346  | RFASVYAW     | 0,6744 |
| A24 | HLA-A*24:22 | 350  | VYAWNKRRI    | 0,6447 |
| A24 | HLA-A*24:22 | 368  | LYNSASFSTF   | 0,9108 |



|     |             |      |              |        |
|-----|-------------|------|--------------|--------|
| A24 | HLA-A*24:22 | 369  | YNSASFSTF    | 0,6618 |
| A24 | HLA-A*24:22 | 379  | CYGVSPTKL    | 0,6159 |
| A24 | HLA-A*24:22 | 448  | NYNLYRLF     | 0,9199 |
| A24 | HLA-A*24:22 | 488  | CYFPLQSYGF   | 0,766  |
| A24 | HLA-A*24:22 | 489  | YFPLQSYGF    | 0,9702 |
| A24 | HLA-A*24:22 | 504  | GYQPYRVVV    | 0,6915 |
| A24 | HLA-A*24:22 | 504  | GYQPYRVVVL   | 0,6647 |
| A24 | HLA-A*24:22 | 504  | GYQPYRVVLSF  | 0,7575 |
| A24 | HLA-A*24:22 | 507  | PYRVVLSF     | 0,8211 |
| A24 | HLA-A*24:22 | 558  | KFLPFQF      | 0,7981 |
| A24 | HLA-A*24:22 | 634  | RVYSTGSNVF   | 0,8412 |
| A24 | HLA-A*24:22 | 635  | VYSTGSNVF    | 0,9766 |
| A24 | HLA-A*24:22 | 659  | SYECDIPGAGI  | 0,6229 |
| A24 | HLA-A*24:22 | 706  | AYSNNSIAI    | 0,7925 |
| A24 | HLA-A*24:22 | 755  | QYGSFCTQL    | 0,7423 |
| A24 | HLA-A*24:22 | 788  | IYKTPPIKDF   | 0,9284 |
| A24 | HLA-A*24:22 | 816  | SFIEDLLF     | 0,7943 |
| A24 | HLA-A*24:22 | 880  | GTITSGWTF    | 0,6649 |
| A24 | HLA-A*24:22 | 1051 | SFPQSAPHGVVF | 0,8172 |
| A24 | HLA-A*24:22 | 1066 | TYVPAQEKNF   | 0,9704 |
| A24 | HLA-A*24:22 | 1094 | VFVSNGTHW    | 0,9217 |
| A24 | HLA-A*24:22 | 1094 | VFVSNGTHWF   | 0,8558 |
| A24 | HLA-A*24:22 | 1095 | FVSNGTHWF    | 0,6853 |
| A24 | HLA-A*24:22 | 1101 | HWFVTQRNF    | 0,884  |
| A24 | HLA-A*24:22 | 1137 | VYDPLQPEL    | 0,9126 |
| A24 | HLA-A*24:22 | 1137 | VYDPLQPELDSF | 0,8166 |
| A24 | HLA-A*24:22 | 1147 | SFKEELDKYF   | 0,7313 |
| A24 | HLA-A*24:22 | 1208 | QYIKWPWYI    | 0,9408 |
| A24 | HLA-A*24:22 | 1208 | QYIKWPWYIW   | 0,7516 |
| A24 | HLA-A*24:22 | 1211 | KWPWYIWLGF   | 0,6645 |
| A24 | HLA-A*24:22 | 1216 | IWLGFIAGL    | 0,7116 |
| A24 | HLA-A*24:23 | 36   | VYYPDKVF     | 0,8969 |
| A24 | HLA-A*24:23 | 37   | YYPDKVFRSSVL | 0,7149 |
| A24 | HLA-A*24:23 | 57   | PFFSNVTWF    | 0,8822 |
| A24 | HLA-A*24:23 | 77   | KRFDNPVLPF   | 0,6134 |
| A24 | HLA-A*24:23 | 78   | RFDNPVLPF    | 0,9523 |
| A24 | HLA-A*24:23 | 143  | VYYHKNNKSW   | 0,8351 |
| A24 | HLA-A*24:23 | 144  | YYHKNNKSW    | 0,9523 |
| A24 | HLA-A*24:23 | 151  | SWMESEFRV    | 0,7048 |
| A24 | HLA-A*24:23 | 159  | VYSSANNCTF   | 0,9732 |
| A24 | HLA-A*24:23 | 167  | TFEYVSQPF    | 0,6889 |
| A24 | HLA-A*24:23 | 169  | EYVSQPFLM    | 0,8798 |
| A24 | HLA-A*24:23 | 193  | VFKNIDGYF    | 0,8984 |
| A24 | HLA-A*24:23 | 203  | IYSKHTPINL   | 0,8029 |
| A24 | HLA-A*24:23 | 247  | SYLTPGDSSSGW | 0,7197 |
| A24 | HLA-A*24:23 | 264  | AYYVGYLQPRTF | 0,8966 |
| A24 | HLA-A*24:23 | 265  | YYVGYLQPRTF  | 0,9506 |
| A24 | HLA-A*24:23 | 265  | YYVGYLQPRTF  | 0,6242 |
| A24 | HLA-A*24:23 | 267  | VGYLQPRTF    | 0,7184 |
| A24 | HLA-A*24:23 | 268  | GYLQPRTF     | 0,7874 |

|     |             |      |              |        |
|-----|-------------|------|--------------|--------|
| A24 | HLA-A*24:23 | 268  | GYLQPRTFL    | 0,9337 |
| A24 | HLA-A*24:23 | 268  | GYLQPRTFLL   | 0,8923 |
| A24 | HLA-A*24:23 | 312  | IYQTSNFRV    | 0,8841 |
| A24 | HLA-A*24:23 | 328  | RFPNITNLCPF  | 0,9389 |
| A24 | HLA-A*24:23 | 346  | RFASVYAW     | 0,7335 |
| A24 | HLA-A*24:23 | 350  | VYAWNKRRI    | 0,6686 |
| A24 | HLA-A*24:23 | 368  | LYNSASFSTF   | 0,9453 |
| A24 | HLA-A*24:23 | 379  | CYGVSPTKL    | 0,6202 |
| A24 | HLA-A*24:23 | 395  | VYADSFVI     | 0,6956 |
| A24 | HLA-A*24:23 | 448  | NYNLYRLF     | 0,9379 |
| A24 | HLA-A*24:23 | 488  | CYFPLQSYGF   | 0,7404 |
| A24 | HLA-A*24:23 | 489  | YFPLQSYGF    | 0,9778 |
| A24 | HLA-A*24:23 | 504  | GYQPYRVVV    | 0,7982 |
| A24 | HLA-A*24:23 | 504  | GYQPYRVVVL   | 0,7444 |
| A24 | HLA-A*24:23 | 504  | GYQPYRVVLSF  | 0,8581 |
| A24 | HLA-A*24:23 | 507  | PYRVVLSF     | 0,8533 |
| A24 | HLA-A*24:23 | 558  | KFLPFQQF     | 0,8636 |
| A24 | HLA-A*24:23 | 632  | TWRVYSTGSNVF | 0,5957 |
| A24 | HLA-A*24:23 | 634  | RVYSTGSNVF   | 0,8822 |
| A24 | HLA-A*24:23 | 635  | VYSTGSNVF    | 0,9872 |
| A24 | HLA-A*24:23 | 659  | SYECDIPIGAGI | 0,6187 |
| A24 | HLA-A*24:23 | 706  | AYSNNIAI     | 0,8828 |
| A24 | HLA-A*24:23 | 755  | QYGSFCTQL    | 0,7929 |
| A24 | HLA-A*24:23 | 788  | IYKTPPIKDF   | 0,9538 |
| A24 | HLA-A*24:23 | 816  | SFIEDLLF     | 0,8244 |
| A24 | HLA-A*24:23 | 1051 | SFPQSAPHGVVF | 0,8397 |
| A24 | HLA-A*24:23 | 1066 | TYVPAQEKNF   | 0,97   |
| A24 | HLA-A*24:23 | 1094 | VFVSNGTHW    | 0,9343 |
| A24 | HLA-A*24:23 | 1094 | VFVSNGTHWF   | 0,8723 |
| A24 | HLA-A*24:23 | 1101 | HWFVTQRNF    | 0,9047 |
| A24 | HLA-A*24:23 | 1137 | VYDPLQPEL    | 0,9496 |
| A24 | HLA-A*24:23 | 1137 | VYDPLQPELDSF | 0,8822 |
| A24 | HLA-A*24:23 | 1147 | SFKEELDKYF   | 0,6438 |
| A24 | HLA-A*24:23 | 1205 | KYEQYIKW     | 0,6328 |
| A24 | HLA-A*24:23 | 1208 | QYIKWPWYI    | 0,9753 |
| A24 | HLA-A*24:23 | 1208 | QYIKWPWYIW   | 0,7703 |
| A24 | HLA-A*24:23 | 1211 | KWPWYIWLGF   | 0,7747 |
| A24 | HLA-A*24:23 | 1216 | IWLGFIAGL    | 0,7773 |
| A24 | HLA-A*24:26 | 37   | YYPDKVFRSSVL | 0,601  |
| A24 | HLA-A*24:26 | 57   | PFFSNVTWF    | 0,8728 |
| A24 | HLA-A*24:26 | 78   | RFDNPVLPF    | 0,8538 |
| A24 | HLA-A*24:26 | 143  | VYYHKNNKSW   | 0,7378 |
| A24 | HLA-A*24:26 | 144  | YYHKNNKSW    | 0,8416 |
| A24 | HLA-A*24:26 | 151  | SWMESEFRV    | 0,5046 |
| A24 | HLA-A*24:26 | 159  | VYSSANNCTF   | 0,9582 |
| A24 | HLA-A*24:26 | 167  | TFEYVSQPF    | 0,5365 |
| A24 | HLA-A*24:26 | 169  | EYVSQPFLM    | 0,8484 |
| A24 | HLA-A*24:26 | 203  | IYSKHTPINL   | 0,7085 |
| A24 | HLA-A*24:26 | 264  | AYYVGYLQPRTF | 0,8037 |
| A24 | HLA-A*24:26 | 265  | YYVGYLQPRTF  | 0,9005 |

|     |             |      |              |        |
|-----|-------------|------|--------------|--------|
| A24 | HLA-A*24:26 | 268  | GYLQPRTFLL   | 0,731  |
| A24 | HLA-A*24:26 | 269  | YLQPRTFLL    | 0,5359 |
| A24 | HLA-A*24:26 | 312  | IYQTSNFRV    | 0,785  |
| A24 | HLA-A*24:26 | 328  | RFPNITNLCPF  | 0,8789 |
| A24 | HLA-A*24:26 | 346  | RFASVYAW     | 0,521  |
| A24 | HLA-A*24:26 | 368  | LYNSASFSTF   | 0,914  |
| A24 | HLA-A*24:26 | 395  | VYADSFVI     | 0,6394 |
| A24 | HLA-A*24:26 | 448  | NYNLYRLF     | 0,9353 |
| A24 | HLA-A*24:26 | 488  | CYFPLQSYGF   | 0,5885 |
| A24 | HLA-A*24:26 | 489  | YFPLQSYGF    | 0,9442 |
| A24 | HLA-A*24:26 | 504  | GYQPYRVVLSF  | 0,6707 |
| A24 | HLA-A*24:26 | 507  | PYRVVLSF     | 0,8166 |
| A24 | HLA-A*24:26 | 558  | KFLPFQQF     | 0,6948 |
| A24 | HLA-A*24:26 | 634  | RVYSTGSNVF   | 0,7146 |
| A24 | HLA-A*24:26 | 635  | VYSTGSNVF    | 0,9696 |
| A24 | HLA-A*24:26 | 755  | QYGSFCTQL    | 0,5614 |
| A24 | HLA-A*24:26 | 788  | IYKTPPIKDF   | 0,9226 |
| A24 | HLA-A*24:26 | 816  | SFIEDLLF     | 0,7253 |
| A24 | HLA-A*24:26 | 1066 | TYVPAQEKNF   | 0,9479 |
| A24 | HLA-A*24:26 | 1094 | VFVSNGTHW    | 0,8658 |
| A24 | HLA-A*24:26 | 1094 | VFVSNGTHWF   | 0,8335 |
| A24 | HLA-A*24:26 | 1101 | HWFVTQRNF    | 0,754  |
| A24 | HLA-A*24:26 | 1137 | VYDPLQPELDSF | 0,8174 |
| A24 | HLA-A*24:26 | 1208 | QYIKWPWYI    | 0,9613 |
| A24 | HLA-A*24:26 | 1208 | QYIKWPWYIW   | 0,7582 |
| A24 | HLA-A*24:26 | 1211 | KWPWYIWLGF   | 0,6582 |
| A24 | HLA-A*24:27 | 37   | YYPDKVFRSSVL | 0,601  |
| A24 | HLA-A*24:27 | 57   | PFFSNVTWF    | 0,8728 |
| A24 | HLA-A*24:27 | 78   | RFDNPVLPF    | 0,8538 |
| A24 | HLA-A*24:27 | 143  | VYYHKNNKSW   | 0,7378 |
| A24 | HLA-A*24:27 | 144  | YYHKNNKSW    | 0,8416 |
| A24 | HLA-A*24:27 | 151  | SWMESEFRV    | 0,5046 |
| A24 | HLA-A*24:27 | 159  | VYSSANNCTF   | 0,9582 |
| A24 | HLA-A*24:27 | 167  | TFEYVSQPF    | 0,5365 |
| A24 | HLA-A*24:27 | 169  | EYVSQPFLM    | 0,8484 |
| A24 | HLA-A*24:27 | 203  | IYSKHTPINL   | 0,7085 |
| A24 | HLA-A*24:27 | 264  | AYYVGYLQPRTF | 0,8037 |
| A24 | HLA-A*24:27 | 265  | YYVGYLQPRTF  | 0,9005 |
| A24 | HLA-A*24:27 | 268  | GYLQPRTFLL   | 0,731  |
| A24 | HLA-A*24:27 | 269  | YLQPRTFLL    | 0,5359 |
| A24 | HLA-A*24:27 | 312  | IYQTSNFRV    | 0,785  |
| A24 | HLA-A*24:27 | 328  | RFPNITNLCPF  | 0,8789 |
| A24 | HLA-A*24:27 | 346  | RFASVYAW     | 0,521  |
| A24 | HLA-A*24:27 | 368  | LYNSASFSTF   | 0,914  |
| A24 | HLA-A*24:27 | 395  | VYADSFVI     | 0,6394 |
| A24 | HLA-A*24:27 | 448  | NYNLYRLF     | 0,9353 |
| A24 | HLA-A*24:27 | 488  | CYFPLQSYGF   | 0,5885 |
| A24 | HLA-A*24:27 | 489  | YFPLQSYGF    | 0,9442 |
| A24 | HLA-A*24:27 | 504  | GYQPYRVVLSF  | 0,6707 |
| A24 | HLA-A*24:27 | 507  | PYRVVLSF     | 0,8166 |

|     |             |      |              |        |
|-----|-------------|------|--------------|--------|
| A24 | HLA-A*24:27 | 558  | KFLPFQQF     | 0,6948 |
| A24 | HLA-A*24:27 | 634  | RVYSTGSNVF   | 0,7146 |
| A24 | HLA-A*24:27 | 635  | VYSTGSNVF    | 0,9696 |
| A24 | HLA-A*24:27 | 755  | QYGSFCTQL    | 0,5614 |
| A24 | HLA-A*24:27 | 788  | IYKTPPIKDF   | 0,9226 |
| A24 | HLA-A*24:27 | 816  | SFIEDLLF     | 0,7253 |
| A24 | HLA-A*24:27 | 1066 | TYVPAQEKNF   | 0,9479 |
| A24 | HLA-A*24:27 | 1094 | VFVSNGTHW    | 0,8658 |
| A24 | HLA-A*24:27 | 1094 | VFVSNGTHWF   | 0,8335 |
| A24 | HLA-A*24:27 | 1101 | HWFVTQRNF    | 0,754  |
| A24 | HLA-A*24:27 | 1137 | VYDPLQPELDSF | 0,8174 |
| A24 | HLA-A*24:27 | 1208 | QYIKWPWYI    | 0,9613 |
| A24 | HLA-A*24:27 | 1208 | QYIKWPWYIW   | 0,7582 |
| A24 | HLA-A*24:27 | 1211 | KWPWYIWLGF   | 0,6582 |
| A24 | HLA-A*24:28 | 151  | SWMESEFRV    | 0,6568 |
| A24 | HLA-A*24:28 | 269  | YLQPRTFLL    | 0,5702 |
| A24 | HLA-A*24:28 | 312  | IYQTSNFRV    | 0,5721 |
| A24 | HLA-A*24:28 | 1208 | QYIKWPWYI    | 0,7279 |
| A24 | HLA-A*24:28 | 1216 | IWLGFIAGL    | 0,697  |
| A24 | HLA-A*24:29 | 37   | YYPDKVFRSSVL | 0,601  |
| A24 | HLA-A*24:29 | 57   | PFFSNVTWF    | 0,8728 |
| A24 | HLA-A*24:29 | 78   | RFDNPVLPF    | 0,8538 |
| A24 | HLA-A*24:29 | 143  | VYYHKNNKSW   | 0,7378 |
| A24 | HLA-A*24:29 | 144  | YYHKNNKSW    | 0,8416 |
| A24 | HLA-A*24:29 | 151  | SWMESEFRV    | 0,5046 |
| A24 | HLA-A*24:29 | 159  | VYSSANNCTF   | 0,9582 |
| A24 | HLA-A*24:29 | 167  | TFEYVSQPF    | 0,5365 |
| A24 | HLA-A*24:29 | 169  | EYVSQPFLM    | 0,8484 |
| A24 | HLA-A*24:29 | 203  | IYSKHTPINL   | 0,7085 |
| A24 | HLA-A*24:29 | 264  | AYYVGYLQPRTF | 0,8037 |
| A24 | HLA-A*24:29 | 265  | YYVGYLQPRTF  | 0,9005 |
| A24 | HLA-A*24:29 | 268  | GYLQPRTFLL   | 0,731  |
| A24 | HLA-A*24:29 | 269  | YLQPRTFLL    | 0,5359 |
| A24 | HLA-A*24:29 | 312  | IYQTSNFRV    | 0,785  |
| A24 | HLA-A*24:29 | 328  | RFPNITNLCPF  | 0,8789 |
| A24 | HLA-A*24:29 | 346  | RFASVYAW     | 0,521  |
| A24 | HLA-A*24:29 | 368  | LYNSASFSTF   | 0,914  |
| A24 | HLA-A*24:29 | 395  | VYADSFVI     | 0,6394 |
| A24 | HLA-A*24:29 | 448  | NYNLYRLF     | 0,9353 |
| A24 | HLA-A*24:29 | 488  | CYFPLQSYGF   | 0,5885 |
| A24 | HLA-A*24:29 | 489  | YFPLQSYGF    | 0,9442 |
| A24 | HLA-A*24:29 | 504  | GYQPYRVVLSF  | 0,6707 |
| A24 | HLA-A*24:29 | 507  | PYRVVLSF     | 0,8166 |
| A24 | HLA-A*24:29 | 558  | KFLPFQQF     | 0,6948 |
| A24 | HLA-A*24:29 | 634  | RVYSTGSNVF   | 0,7146 |
| A24 | HLA-A*24:29 | 635  | VYSTGSNVF    | 0,9696 |
| A24 | HLA-A*24:29 | 755  | QYGSFCTQL    | 0,5614 |
| A24 | HLA-A*24:29 | 788  | IYKTPPIKDF   | 0,9226 |
| A24 | HLA-A*24:29 | 816  | SFIEDLLF     | 0,7253 |
| A24 | HLA-A*24:29 | 1066 | TYVPAQEKNF   | 0,9479 |

|     |             |      |              |        |
|-----|-------------|------|--------------|--------|
| A24 | HLA-A*24:29 | 1094 | VFVSNQTHW    | 0,8658 |
| A24 | HLA-A*24:29 | 1094 | VFVSNQTHWF   | 0,8335 |
| A24 | HLA-A*24:29 | 1101 | HWFVTQRNF    | 0,754  |
| A24 | HLA-A*24:29 | 1137 | VYDPLQPELDSF | 0,8174 |
| A24 | HLA-A*24:29 | 1208 | QYIKWPWYI    | 0,9613 |
| A24 | HLA-A*24:29 | 1208 | QYIKWPWYIW   | 0,7582 |
| A24 | HLA-A*24:29 | 1211 | KWPWYIWLGF   | 0,6582 |
| A24 | HLA-A*24:33 | 36   | VYYPDKVF     | 0,8969 |
| A24 | HLA-A*24:33 | 37   | YYPDKVFRSSVL | 0,7149 |
| A24 | HLA-A*24:33 | 57   | PFFSNVTWF    | 0,8822 |
| A24 | HLA-A*24:33 | 77   | KRFDNPVLPF   | 0,6134 |
| A24 | HLA-A*24:33 | 78   | RFDNPVLPF    | 0,9523 |
| A24 | HLA-A*24:33 | 143  | VYYHKNNKSW   | 0,8351 |
| A24 | HLA-A*24:33 | 144  | YYHKNNKSW    | 0,9523 |
| A24 | HLA-A*24:33 | 151  | SWMESEFRV    | 0,7048 |
| A24 | HLA-A*24:33 | 159  | VYSSANNCTF   | 0,9732 |
| A24 | HLA-A*24:33 | 167  | TFEYVSQPF    | 0,6889 |
| A24 | HLA-A*24:33 | 169  | EYVSQPFLM    | 0,8798 |
| A24 | HLA-A*24:33 | 193  | VFKNIDGYF    | 0,8984 |
| A24 | HLA-A*24:33 | 203  | IYSKHTPINL   | 0,8029 |
| A24 | HLA-A*24:33 | 247  | SYLTPGDSSSGW | 0,7197 |
| A24 | HLA-A*24:33 | 264  | AYYVGYLQPRTF | 0,8966 |
| A24 | HLA-A*24:33 | 265  | YYVGYLQPRTF  | 0,9506 |
| A24 | HLA-A*24:33 | 265  | YYVGYLQPRTFL | 0,6242 |
| A24 | HLA-A*24:33 | 267  | VGYLQPRTFL   | 0,7184 |
| A24 | HLA-A*24:33 | 268  | GYLQPRTF     | 0,7874 |
| A24 | HLA-A*24:33 | 268  | GYLQPRTFL    | 0,9337 |
| A24 | HLA-A*24:33 | 268  | GYLQPRTFLL   | 0,8923 |
| A24 | HLA-A*24:33 | 312  | IYQTSNFRV    | 0,8841 |
| A24 | HLA-A*24:33 | 328  | RFPNITNLCPF  | 0,9389 |
| A24 | HLA-A*24:33 | 346  | RFASVYAW     | 0,7335 |
| A24 | HLA-A*24:33 | 350  | VYAWNKRRI    | 0,6686 |
| A24 | HLA-A*24:33 | 368  | LYNSASFSTF   | 0,9453 |
| A24 | HLA-A*24:33 | 379  | CYGVSPTKL    | 0,6202 |
| A24 | HLA-A*24:33 | 395  | VYADSFVI     | 0,6956 |
| A24 | HLA-A*24:33 | 448  | NYNLYRLF     | 0,9379 |
| A24 | HLA-A*24:33 | 488  | CYFPLQSYGF   | 0,7404 |
| A24 | HLA-A*24:33 | 489  | YFPLQSYGF    | 0,9778 |
| A24 | HLA-A*24:33 | 504  | GYQPYRVVV    | 0,7982 |
| A24 | HLA-A*24:33 | 504  | GYQPYRVVVL   | 0,7444 |
| A24 | HLA-A*24:33 | 504  | GYQPYRVVLSF  | 0,8581 |
| A24 | HLA-A*24:33 | 507  | PYRVVLSF     | 0,8533 |
| A24 | HLA-A*24:33 | 558  | KFLPFQQF     | 0,8636 |
| A24 | HLA-A*24:33 | 632  | TWRVYSTGSNVF | 0,5957 |
| A24 | HLA-A*24:33 | 634  | RVYSTGSNVF   | 0,8822 |
| A24 | HLA-A*24:33 | 635  | VYSTGSNVF    | 0,9872 |
| A24 | HLA-A*24:33 | 659  | SYECDIPIGAGI | 0,6187 |
| A24 | HLA-A*24:33 | 706  | AYSNNNSIAI   | 0,8828 |
| A24 | HLA-A*24:33 | 755  | QYGSFCTQL    | 0,7929 |
| A24 | HLA-A*24:33 | 788  | IYKTPPIKDF   | 0,9538 |

|     |             |      |              |        |
|-----|-------------|------|--------------|--------|
| A24 | HLA-A*24:33 | 816  | SFIEDLLF     | 0,8244 |
| A24 | HLA-A*24:33 | 1051 | SFPQSAPHGVVF | 0,8397 |
| A24 | HLA-A*24:33 | 1066 | TYVPAQEKNF   | 0,97   |
| A24 | HLA-A*24:33 | 1094 | VFVSNNGTHW   | 0,9343 |
| A24 | HLA-A*24:33 | 1094 | VFVSNNGTHWF  | 0,8723 |
| A24 | HLA-A*24:33 | 1101 | HWFVTQRNF    | 0,9047 |
| A24 | HLA-A*24:33 | 1137 | VYDPLQPEL    | 0,9496 |
| A24 | HLA-A*24:33 | 1137 | VYDPLQPELDSF | 0,8822 |
| A24 | HLA-A*24:33 | 1147 | SFKEELDKYF   | 0,6438 |
| A24 | HLA-A*24:33 | 1205 | KYEQYIKW     | 0,6328 |
| A24 | HLA-A*24:33 | 1208 | QYIKWPWYI    | 0,9753 |
| A24 | HLA-A*24:33 | 1208 | QYIKWPWYIW   | 0,7703 |
| A24 | HLA-A*24:33 | 1211 | KWPWYIWLGF   | 0,7747 |
| A24 | HLA-A*24:33 | 1216 | IWLGFIAGL    | 0,7773 |
| A24 | HLA-A*24:34 | 37   | YYPDKVFRSSVL | 0,6196 |
| A24 | HLA-A*24:34 | 57   | PFFSNVTWF    | 0,8335 |
| A24 | HLA-A*24:34 | 78   | RFDNPVLPF    | 0,8388 |
| A24 | HLA-A*24:34 | 143  | VYYHKNNKSW   | 0,6844 |
| A24 | HLA-A*24:34 | 144  | YYHKNNKSW    | 0,819  |
| A24 | HLA-A*24:34 | 151  | SWMESEFRV    | 0,5644 |
| A24 | HLA-A*24:34 | 159  | VYSSANNCTF   | 0,9424 |
| A24 | HLA-A*24:34 | 167  | TFEYVSQPF    | 0,5518 |
| A24 | HLA-A*24:34 | 169  | EYVSQPFLM    | 0,8551 |
| A24 | HLA-A*24:34 | 193  | VFKNIDGYF    | 0,7905 |
| A24 | HLA-A*24:34 | 203  | IYSKHTPINL   | 0,7288 |
| A24 | HLA-A*24:34 | 264  | AYYYGYLQPRTF | 0,7698 |
| A24 | HLA-A*24:34 | 265  | YYVGYLQPRTF  | 0,857  |
| A24 | HLA-A*24:34 | 268  | GYLQPRTFLL   | 0,7636 |
| A24 | HLA-A*24:34 | 269  | YLQPRTFLL    | 0,6367 |
| A24 | HLA-A*24:34 | 312  | IYQTSNFRV    | 0,7925 |
| A24 | HLA-A*24:34 | 328  | RFPNITNLCPF  | 0,8538 |
| A24 | HLA-A*24:34 | 350  | VYAWNRKRI    | 0,5795 |
| A24 | HLA-A*24:34 | 368  | LYNSASFSTF   | 0,9096 |
| A24 | HLA-A*24:34 | 395  | VYADSFVI     | 0,6072 |
| A24 | HLA-A*24:34 | 448  | NYNLYRLF     | 0,9345 |
| A24 | HLA-A*24:34 | 488  | CYFPLQSYGF   | 0,618  |
| A24 | HLA-A*24:34 | 489  | YFPLQSYGF    | 0,9263 |
| A24 | HLA-A*24:34 | 504  | GYQPYRVVLSF  | 0,6666 |
| A24 | HLA-A*24:34 | 507  | PYRVVLSF     | 0,7841 |
| A24 | HLA-A*24:34 | 634  | RVYSTGSNVF   | 0,6878 |
| A24 | HLA-A*24:34 | 635  | VYSTGSNVF    | 0,9648 |
| A24 | HLA-A*24:34 | 706  | AYSNNSIAI    | 0,7097 |
| A24 | HLA-A*24:34 | 755  | QYGSFCTQL    | 0,6183 |
| A24 | HLA-A*24:34 | 788  | IYKTPPIKDF   | 0,9047 |
| A24 | HLA-A*24:34 | 897  | PFAMQMAYRF   | 0,5116 |
| A24 | HLA-A*24:34 | 1066 | TYVPAQEKNF   | 0,9166 |
| A24 | HLA-A*24:34 | 1094 | VFVSNNGTHW   | 0,866  |
| A24 | HLA-A*24:34 | 1094 | VFVSNNGTHWF  | 0,8212 |
| A24 | HLA-A*24:34 | 1101 | HWFVTQRNF    | 0,7483 |
| A24 | HLA-A*24:34 | 1137 | VYDPLQPELDSF | 0,7712 |

|     |             |      |              |        |
|-----|-------------|------|--------------|--------|
| A24 | HLA-A*24:34 | 1208 | QYIKWPWYI    | 0,9658 |
| A24 | HLA-A*24:34 | 1208 | QYIKWPWYIW   | 0,7348 |
| A24 | HLA-A*24:34 | 1211 | KWPWYIWLGF   | 0,6265 |
| A24 | HLA-A*24:35 | 37   | YYPDKVFRSSVL | 0,601  |
| A24 | HLA-A*24:35 | 57   | PFFSNVTWF    | 0,8728 |
| A24 | HLA-A*24:35 | 78   | RFDNPVLPF    | 0,8538 |
| A24 | HLA-A*24:35 | 143  | VYYHKNNKSW   | 0,7378 |
| A24 | HLA-A*24:35 | 144  | YYHKNNKSW    | 0,8416 |
| A24 | HLA-A*24:35 | 151  | SWMESEFRV    | 0,5046 |
| A24 | HLA-A*24:35 | 159  | VYSSANNCTF   | 0,9582 |
| A24 | HLA-A*24:35 | 167  | TFEYVSQPF    | 0,5365 |
| A24 | HLA-A*24:35 | 169  | EYVSQPFLM    | 0,8484 |
| A24 | HLA-A*24:35 | 203  | IYSKHTPINL   | 0,7085 |
| A24 | HLA-A*24:35 | 264  | AYYVGYLQPRTF | 0,8037 |
| A24 | HLA-A*24:35 | 265  | YYVGYLQPRTF  | 0,9005 |
| A24 | HLA-A*24:35 | 268  | GYLQPRTFLL   | 0,731  |
| A24 | HLA-A*24:35 | 269  | YLQPRTFLL    | 0,5359 |
| A24 | HLA-A*24:35 | 312  | IYQTSNFRV    | 0,785  |
| A24 | HLA-A*24:35 | 328  | RFPNITNLCPF  | 0,8789 |
| A24 | HLA-A*24:35 | 346  | RFASVYAW     | 0,521  |
| A24 | HLA-A*24:35 | 368  | LYNSASFSTF   | 0,914  |
| A24 | HLA-A*24:35 | 395  | VYADSFVI     | 0,6394 |
| A24 | HLA-A*24:35 | 448  | NYNLYRLF     | 0,9353 |
| A24 | HLA-A*24:35 | 488  | CYFPLQSYGF   | 0,5885 |
| A24 | HLA-A*24:35 | 489  | YFPLQSYGF    | 0,9442 |
| A24 | HLA-A*24:35 | 504  | GYQPYRVVLSF  | 0,6707 |
| A24 | HLA-A*24:35 | 507  | PYRVVLSF     | 0,8166 |
| A24 | HLA-A*24:35 | 558  | KFLPFQQF     | 0,6948 |
| A24 | HLA-A*24:35 | 634  | RVYSTGSNVF   | 0,7146 |
| A24 | HLA-A*24:35 | 635  | VYSTGSNVF    | 0,9696 |
| A24 | HLA-A*24:35 | 755  | QYGSFCTQL    | 0,5614 |
| A24 | HLA-A*24:35 | 788  | IYKTPPIKDF   | 0,9226 |
| A24 | HLA-A*24:35 | 816  | SFIEDLLF     | 0,7253 |
| A24 | HLA-A*24:35 | 1066 | TYVPAQEKNF   | 0,9479 |
| A24 | HLA-A*24:35 | 1094 | VFVSNGTHW    | 0,8658 |
| A24 | HLA-A*24:35 | 1094 | VFVSNGTHWF   | 0,8335 |
| A24 | HLA-A*24:35 | 1101 | HWFVTQRNF    | 0,754  |
| A24 | HLA-A*24:35 | 1137 | VYDPLQPELDSF | 0,8174 |
| A24 | HLA-A*24:35 | 1208 | QYIKWPWYI    | 0,9613 |
| A24 | HLA-A*24:35 | 1208 | QYIKWPWYIW   | 0,7582 |
| A24 | HLA-A*24:35 | 1211 | KWPWYIWLGF   | 0,6582 |
| A24 | HLA-A*24:37 | 37   | YYPDKVFRSSVL | 0,601  |
| A24 | HLA-A*24:37 | 57   | PFFSNVTWF    | 0,8728 |
| A24 | HLA-A*24:37 | 78   | RFDNPVLPF    | 0,8538 |
| A24 | HLA-A*24:37 | 143  | VYYHKNNKSW   | 0,7378 |
| A24 | HLA-A*24:37 | 144  | YYHKNNKSW    | 0,8416 |
| A24 | HLA-A*24:37 | 151  | SWMESEFRV    | 0,5046 |
| A24 | HLA-A*24:37 | 159  | VYSSANNCTF   | 0,9582 |
| A24 | HLA-A*24:37 | 167  | TFEYVSQPF    | 0,5365 |
| A24 | HLA-A*24:37 | 169  | EYVSQPFLM    | 0,8484 |

|     |             |      |              |        |
|-----|-------------|------|--------------|--------|
| A24 | HLA-A*24:37 | 203  | IYSKHTPINL   | 0,7085 |
| A24 | HLA-A*24:37 | 264  | AYYVGYLQPRTF | 0,8037 |
| A24 | HLA-A*24:37 | 265  | YYVGYLQPRTF  | 0,9005 |
| A24 | HLA-A*24:37 | 268  | GYLQPRTFLL   | 0,731  |
| A24 | HLA-A*24:37 | 269  | YLQPRTFLL    | 0,5359 |
| A24 | HLA-A*24:37 | 312  | IYQTSNFRV    | 0,785  |
| A24 | HLA-A*24:37 | 328  | RFPNITNLCPF  | 0,8789 |
| A24 | HLA-A*24:37 | 346  | RFASVYAW     | 0,521  |
| A24 | HLA-A*24:37 | 368  | LYNSASFSTF   | 0,914  |
| A24 | HLA-A*24:37 | 395  | VYADSFVI     | 0,6394 |
| A24 | HLA-A*24:37 | 448  | NYNLYRLF     | 0,9353 |
| A24 | HLA-A*24:37 | 488  | CYFPLQSYGF   | 0,5885 |
| A24 | HLA-A*24:37 | 489  | YFPLQSYGF    | 0,9442 |
| A24 | HLA-A*24:37 | 504  | GYQPYRVVLSF  | 0,6707 |
| A24 | HLA-A*24:37 | 507  | PYRVVLSF     | 0,8166 |
| A24 | HLA-A*24:37 | 558  | KFLPFQQF     | 0,6948 |
| A24 | HLA-A*24:37 | 634  | RVYSTGSNVF   | 0,7146 |
| A24 | HLA-A*24:37 | 635  | VYSTGSNVF    | 0,9696 |
| A24 | HLA-A*24:37 | 755  | QYGSFCTQL    | 0,5614 |
| A24 | HLA-A*24:37 | 788  | IYKTPPIKDF   | 0,9226 |
| A24 | HLA-A*24:37 | 816  | SFIEDLLF     | 0,7253 |
| A24 | HLA-A*24:37 | 1066 | TYVPAQEKNF   | 0,9479 |
| A24 | HLA-A*24:37 | 1094 | VFVSNGTHW    | 0,8658 |
| A24 | HLA-A*24:37 | 1094 | VFVSNGTHWF   | 0,8335 |
| A24 | HLA-A*24:37 | 1101 | HWFVTQRNF    | 0,754  |
| A24 | HLA-A*24:37 | 1137 | VYDPLQPELDSF | 0,8174 |
| A24 | HLA-A*24:37 | 1208 | QYIKWPWYI    | 0,9613 |
| A24 | HLA-A*24:37 | 1208 | QYIKWPWYIW   | 0,7582 |
| A24 | HLA-A*24:37 | 1211 | KWPWYIWLGF   | 0,6582 |
| A24 | HLA-A*24:38 | 37   | YYPDKVFRSSVL | 0,601  |
| A24 | HLA-A*24:38 | 57   | PFFSNVTWF    | 0,8728 |
| A24 | HLA-A*24:38 | 78   | RFDNPVLPF    | 0,8538 |
| A24 | HLA-A*24:38 | 143  | VYYHKNNKSW   | 0,7378 |
| A24 | HLA-A*24:38 | 144  | YYHKNNKSW    | 0,8416 |
| A24 | HLA-A*24:38 | 151  | SWMESEFRV    | 0,5046 |
| A24 | HLA-A*24:38 | 159  | VYSSANNCTF   | 0,9582 |
| A24 | HLA-A*24:38 | 167  | TFEYVSQPF    | 0,5365 |
| A24 | HLA-A*24:38 | 169  | EYVSQPFLM    | 0,8484 |
| A24 | HLA-A*24:38 | 203  | IYSKHTPINL   | 0,7085 |
| A24 | HLA-A*24:38 | 264  | AYYVGYLQPRTF | 0,8037 |
| A24 | HLA-A*24:38 | 265  | YYVGYLQPRTF  | 0,9005 |
| A24 | HLA-A*24:38 | 268  | GYLQPRTFLL   | 0,731  |
| A24 | HLA-A*24:38 | 269  | YLQPRTFLL    | 0,5359 |
| A24 | HLA-A*24:38 | 312  | IYQTSNFRV    | 0,785  |
| A24 | HLA-A*24:38 | 328  | RFPNITNLCPF  | 0,8789 |
| A24 | HLA-A*24:38 | 346  | RFASVYAW     | 0,521  |
| A24 | HLA-A*24:38 | 368  | LYNSASFSTF   | 0,914  |
| A24 | HLA-A*24:38 | 395  | VYADSFVI     | 0,6394 |
| A24 | HLA-A*24:38 | 448  | NYNLYRLF     | 0,9353 |
| A24 | HLA-A*24:38 | 488  | CYFPLQSYGF   | 0,5885 |



|     |             |      |              |        |
|-----|-------------|------|--------------|--------|
| A24 | HLA-A*24:38 | 489  | YFPLQSYGF    | 0,9442 |
| A24 | HLA-A*24:38 | 504  | GYQPYRVVLSF  | 0,6707 |
| A24 | HLA-A*24:38 | 507  | PYRVVLSF     | 0,8166 |
| A24 | HLA-A*24:38 | 558  | KFLPFQQF     | 0,6948 |
| A24 | HLA-A*24:38 | 634  | RVYSTGSNVF   | 0,7146 |
| A24 | HLA-A*24:38 | 635  | VYSTGSNVF    | 0,9696 |
| A24 | HLA-A*24:38 | 755  | QYGSFCTQL    | 0,5614 |
| A24 | HLA-A*24:38 | 788  | IYKTPPIKDF   | 0,9226 |
| A24 | HLA-A*24:38 | 816  | SFIEDLLF     | 0,7253 |
| A24 | HLA-A*24:38 | 1066 | TYVPAQEKNF   | 0,9479 |
| A24 | HLA-A*24:38 | 1094 | VFVSNATHW    | 0,8658 |
| A24 | HLA-A*24:38 | 1094 | VFVSNATHWF   | 0,8335 |
| A24 | HLA-A*24:38 | 1101 | HWFVTQRNF    | 0,754  |
| A24 | HLA-A*24:38 | 1137 | VYDPLQPELDSF | 0,8174 |
| A24 | HLA-A*24:38 | 1208 | QYIKWPWYI    | 0,9613 |
| A24 | HLA-A*24:38 | 1208 | QYIKWPWYIW   | 0,7582 |
| A24 | HLA-A*24:38 | 1211 | KWPWYIWLGF   | 0,6582 |
| A24 | HLA-A*24:39 | 37   | YYPDKVFRSSVL | 0,601  |
| A24 | HLA-A*24:39 | 57   | PFFSNVTWF    | 0,8728 |
| A24 | HLA-A*24:39 | 78   | RFDNPVLPF    | 0,8538 |
| A24 | HLA-A*24:39 | 143  | VYYHKNNKSW   | 0,7378 |
| A24 | HLA-A*24:39 | 144  | YYHKNNKSW    | 0,8416 |
| A24 | HLA-A*24:39 | 151  | SWMESEFRV    | 0,5046 |
| A24 | HLA-A*24:39 | 159  | VYSSANNCTF   | 0,9582 |
| A24 | HLA-A*24:39 | 167  | TFEYVSQPF    | 0,5365 |
| A24 | HLA-A*24:39 | 169  | EYVSQPFLM    | 0,8484 |
| A24 | HLA-A*24:39 | 203  | IYSKHTPINL   | 0,7085 |
| A24 | HLA-A*24:39 | 264  | AYYVGYLQPRTF | 0,8037 |
| A24 | HLA-A*24:39 | 265  | YYVGYLQPRTF  | 0,9005 |
| A24 | HLA-A*24:39 | 268  | GYLQPRTFLL   | 0,731  |
| A24 | HLA-A*24:39 | 269  | YLQPRTFLL    | 0,5359 |
| A24 | HLA-A*24:39 | 312  | IYQTSNFRV    | 0,785  |
| A24 | HLA-A*24:39 | 328  | RFPNITNLCPF  | 0,8789 |
| A24 | HLA-A*24:39 | 346  | RFASVYAW     | 0,521  |
| A24 | HLA-A*24:39 | 368  | LYNSASFSTF   | 0,914  |
| A24 | HLA-A*24:39 | 395  | VYADSFVI     | 0,6394 |
| A24 | HLA-A*24:39 | 448  | NYNLYRLF     | 0,9353 |
| A24 | HLA-A*24:39 | 488  | CYFPLQSYGF   | 0,5885 |
| A24 | HLA-A*24:39 | 489  | YFPLQSYGF    | 0,9442 |
| A24 | HLA-A*24:39 | 504  | GYQPYRVVLSF  | 0,6707 |
| A24 | HLA-A*24:39 | 507  | PYRVVLSF     | 0,8166 |
| A24 | HLA-A*24:39 | 558  | KFLPFQQF     | 0,6948 |
| A24 | HLA-A*24:39 | 634  | RVYSTGSNVF   | 0,7146 |
| A24 | HLA-A*24:39 | 635  | VYSTGSNVF    | 0,9696 |
| A24 | HLA-A*24:39 | 755  | QYGSFCTQL    | 0,5614 |
| A24 | HLA-A*24:39 | 788  | IYKTPPIKDF   | 0,9226 |
| A24 | HLA-A*24:39 | 816  | SFIEDLLF     | 0,7253 |
| A24 | HLA-A*24:39 | 1066 | TYVPAQEKNF   | 0,9479 |
| A24 | HLA-A*24:39 | 1094 | VFVSNATHW    | 0,8658 |
| A24 | HLA-A*24:39 | 1094 | VFVSNATHWF   | 0,8335 |

|     |             |      |              |        |
|-----|-------------|------|--------------|--------|
| A24 | HLA-A*24:39 | 1101 | HWFVTQRNF    | 0,754  |
| A24 | HLA-A*24:39 | 1137 | VYDPLQPELDSF | 0,8174 |
| A24 | HLA-A*24:39 | 1208 | QYIKWPWYI    | 0,9613 |
| A24 | HLA-A*24:39 | 1208 | QYIKWPWYIW   | 0,7582 |
| A24 | HLA-A*24:39 | 1211 | KWPWYIWLGF   | 0,6582 |
| A24 | HLA-A*24:43 | 37   | YYPDKVFRSSVL | 0,601  |
| A24 | HLA-A*24:43 | 57   | PFFSNVTWF    | 0,8728 |
| A24 | HLA-A*24:43 | 78   | RFDNPVLPF    | 0,8538 |
| A24 | HLA-A*24:43 | 143  | VYYHKNNKSW   | 0,7378 |
| A24 | HLA-A*24:43 | 144  | YYHKNNKSW    | 0,8416 |
| A24 | HLA-A*24:43 | 151  | SWMESEFRV    | 0,5046 |
| A24 | HLA-A*24:43 | 159  | VYSSANNCTF   | 0,9582 |
| A24 | HLA-A*24:43 | 167  | TFEYVSQPF    | 0,5365 |
| A24 | HLA-A*24:43 | 169  | EYVSQPFLM    | 0,8484 |
| A24 | HLA-A*24:43 | 203  | IYSKHTPINL   | 0,7085 |
| A24 | HLA-A*24:43 | 264  | AYYVGYLQPRTF | 0,8037 |
| A24 | HLA-A*24:43 | 265  | YYVGYLQPRTF  | 0,9005 |
| A24 | HLA-A*24:43 | 268  | GYLQPRTFLL   | 0,731  |
| A24 | HLA-A*24:43 | 269  | YLQPRTFLL    | 0,5359 |
| A24 | HLA-A*24:43 | 312  | IYQTSNFRV    | 0,785  |
| A24 | HLA-A*24:43 | 328  | RFPNITNLCPF  | 0,8789 |
| A24 | HLA-A*24:43 | 346  | RFASVYAW     | 0,521  |
| A24 | HLA-A*24:43 | 368  | LYNSASFSTF   | 0,914  |
| A24 | HLA-A*24:43 | 395  | VYADSFVI     | 0,6394 |
| A24 | HLA-A*24:43 | 448  | NYNYLYRLF    | 0,9353 |
| A24 | HLA-A*24:43 | 488  | CYFPLQSYGF   | 0,5885 |
| A24 | HLA-A*24:43 | 489  | YFPLQSYGF    | 0,9442 |
| A24 | HLA-A*24:43 | 504  | GYQPYRVVLSF  | 0,6707 |
| A24 | HLA-A*24:43 | 507  | PYRVVLSF     | 0,8166 |
| A24 | HLA-A*24:43 | 558  | KFLPFQQF     | 0,6948 |
| A24 | HLA-A*24:43 | 634  | RVYSTGSNVF   | 0,7146 |
| A24 | HLA-A*24:43 | 635  | VYSTGSNVF    | 0,9696 |
| A24 | HLA-A*24:43 | 755  | QYGSFCTQL    | 0,5614 |
| A24 | HLA-A*24:43 | 788  | IYKTPPIKDF   | 0,9226 |
| A24 | HLA-A*24:43 | 816  | SFIEDLLF     | 0,7253 |
| A24 | HLA-A*24:43 | 1066 | TYVPAQEKNF   | 0,9479 |
| A24 | HLA-A*24:43 | 1094 | VFVSNGTHW    | 0,8658 |
| A24 | HLA-A*24:43 | 1094 | VFVSNGTHWF   | 0,8335 |
| A24 | HLA-A*24:43 | 1101 | HWFVTQRNF    | 0,754  |
| A24 | HLA-A*24:43 | 1137 | VYDPLQPELDSF | 0,8174 |
| A24 | HLA-A*24:43 | 1208 | QYIKWPWYI    | 0,9613 |
| A24 | HLA-A*24:43 | 1208 | QYIKWPWYIW   | 0,7582 |
| A24 | HLA-A*24:43 | 1211 | KWPWYIWLGF   | 0,6582 |
| A24 | HLA-A*24:46 | 37   | YYPDKVFRSSVL | 0,5855 |
| A24 | HLA-A*24:46 | 57   | PFFSNVTWF    | 0,8459 |
| A24 | HLA-A*24:46 | 78   | RFDNPVLPF    | 0,8229 |
| A24 | HLA-A*24:46 | 159  | VYSSANNCTF   | 0,9103 |
| A24 | HLA-A*24:46 | 169  | EYVSQPFLM    | 0,851  |
| A24 | HLA-A*24:46 | 264  | AYYVGYLQPRTF | 0,6417 |
| A24 | HLA-A*24:46 | 265  | YYVGYLQPRTF  | 0,8194 |

|     |             |      |              |        |
|-----|-------------|------|--------------|--------|
| A24 | HLA-A*24:46 | 268  | GYLQPRTFLL   | 0,6533 |
| A24 | HLA-A*24:46 | 269  | YLQPRTFLL    | 0,5285 |
| A24 | HLA-A*24:46 | 312  | IYQTSNFRV    | 0,6584 |
| A24 | HLA-A*24:46 | 328  | RFPNITNLCPF  | 0,7845 |
| A24 | HLA-A*24:46 | 368  | LYNSASFSTF   | 0,8513 |
| A24 | HLA-A*24:46 | 395  | VYADSFVI     | 0,5561 |
| A24 | HLA-A*24:46 | 448  | NYNLYRLF     | 0,871  |
| A24 | HLA-A*24:46 | 488  | CYFPLQSYGF   | 0,5138 |
| A24 | HLA-A*24:46 | 489  | YFPLQSYGF    | 0,9325 |
| A24 | HLA-A*24:46 | 504  | GYQPYRVVLSF  | 0,5468 |
| A24 | HLA-A*24:46 | 635  | VYSTGSNVF    | 0,9278 |
| A24 | HLA-A*24:46 | 755  | QYGSFCTQL    | 0,5152 |
| A24 | HLA-A*24:46 | 816  | SFIEDLLF     | 0,7078 |
| A24 | HLA-A*24:46 | 1066 | TYVPAQEKNF   | 0,9054 |
| A24 | HLA-A*24:46 | 1094 | VFVSNGTHWF   | 0,756  |
| A24 | HLA-A*24:46 | 1137 | VYDPLQPELDSF | 0,7602 |
| A24 | HLA-A*24:46 | 1208 | QYIKWPWYI    | 0,9343 |
| A24 | HLA-A*24:46 | 1208 | QYIKWPWYIW   | 0,6481 |
| A24 | HLA-A*24:46 | 1211 | KWPWYIWLGF   | 0,5239 |
| A24 | HLA-A*24:47 | 37   | YYPDKVFRSSVL | 0,601  |
| A24 | HLA-A*24:47 | 57   | PFFSNVTWF    | 0,8728 |
| A24 | HLA-A*24:47 | 78   | RFDNPVLPF    | 0,8538 |
| A24 | HLA-A*24:47 | 143  | VYYHKNNKSW   | 0,7378 |
| A24 | HLA-A*24:47 | 144  | YYHKNNKSW    | 0,8416 |
| A24 | HLA-A*24:47 | 151  | SWMESEFRV    | 0,5046 |
| A24 | HLA-A*24:47 | 159  | VYSSANNCTF   | 0,9582 |
| A24 | HLA-A*24:47 | 167  | TFEYVSQPF    | 0,5365 |
| A24 | HLA-A*24:47 | 169  | EYVSQPFLM    | 0,8484 |
| A24 | HLA-A*24:47 | 203  | IYSKHTPINL   | 0,7085 |
| A24 | HLA-A*24:47 | 264  | AYYVGYLQPRTF | 0,8037 |
| A24 | HLA-A*24:47 | 265  | YYVGYLQPRTF  | 0,9005 |
| A24 | HLA-A*24:47 | 268  | GYLQPRTFLL   | 0,731  |
| A24 | HLA-A*24:47 | 269  | YLQPRTFLL    | 0,5359 |
| A24 | HLA-A*24:47 | 312  | IYQTSNFRV    | 0,785  |
| A24 | HLA-A*24:47 | 328  | RFPNITNLCPF  | 0,8789 |
| A24 | HLA-A*24:47 | 346  | RFASVYAW     | 0,521  |
| A24 | HLA-A*24:47 | 368  | LYNSASFSTF   | 0,914  |
| A24 | HLA-A*24:47 | 395  | VYADSFVI     | 0,6394 |
| A24 | HLA-A*24:47 | 448  | NYNLYRLF     | 0,9353 |
| A24 | HLA-A*24:47 | 488  | CYFPLQSYGF   | 0,5885 |
| A24 | HLA-A*24:47 | 489  | YFPLQSYGF    | 0,9442 |
| A24 | HLA-A*24:47 | 504  | GYQPYRVVLSF  | 0,6707 |
| A24 | HLA-A*24:47 | 507  | PYRVVLSF     | 0,8166 |
| A24 | HLA-A*24:47 | 558  | KFLPFQQF     | 0,6948 |
| A24 | HLA-A*24:47 | 634  | RVYSTGSNVF   | 0,7146 |
| A24 | HLA-A*24:47 | 635  | VYSTGSNVF    | 0,9696 |
| A24 | HLA-A*24:47 | 755  | QYGSFCTQL    | 0,5614 |
| A24 | HLA-A*24:47 | 788  | IYKTPPIKDF   | 0,9226 |
| A24 | HLA-A*24:47 | 816  | SFIEDLLF     | 0,7253 |
| A24 | HLA-A*24:47 | 1066 | TYVPAQEKNF   | 0,9479 |

|     |             |      |              |        |
|-----|-------------|------|--------------|--------|
| A24 | HLA-A*24:47 | 1094 | VFVSNQTHW    | 0,8658 |
| A24 | HLA-A*24:47 | 1094 | VFVSNQTHWF   | 0,8335 |
| A24 | HLA-A*24:47 | 1101 | HWFVTQRNF    | 0,754  |
| A24 | HLA-A*24:47 | 1137 | VYDPLQPELDSF | 0,8174 |
| A24 | HLA-A*24:47 | 1208 | QYIKWPWYI    | 0,9613 |
| A24 | HLA-A*24:47 | 1208 | QYIKWPWYIW   | 0,7582 |
| A24 | HLA-A*24:47 | 1211 | KWPWYIWLGF   | 0,6582 |
| A24 | HLA-A*24:49 | 37   | YYPDKVFRSSVL | 0,601  |
| A24 | HLA-A*24:49 | 57   | PFFSNVTWF    | 0,8728 |
| A24 | HLA-A*24:49 | 78   | RFDNPVLPF    | 0,8538 |
| A24 | HLA-A*24:49 | 143  | VYYHKNNKSW   | 0,7378 |
| A24 | HLA-A*24:49 | 144  | YYHKNNKSW    | 0,8416 |
| A24 | HLA-A*24:49 | 151  | SWMESEFRV    | 0,5046 |
| A24 | HLA-A*24:49 | 159  | VYSSANNCTF   | 0,9582 |
| A24 | HLA-A*24:49 | 167  | TFEYVSQPF    | 0,5365 |
| A24 | HLA-A*24:49 | 169  | EYVSQPFLM    | 0,8484 |
| A24 | HLA-A*24:49 | 203  | IYSKHTPINL   | 0,7085 |
| A24 | HLA-A*24:49 | 264  | AYYVGYLQPRTF | 0,8037 |
| A24 | HLA-A*24:49 | 265  | YYVGYLQPRTF  | 0,9005 |
| A24 | HLA-A*24:49 | 268  | GYLQPRTFLL   | 0,731  |
| A24 | HLA-A*24:49 | 269  | YLQPRTFLL    | 0,5359 |
| A24 | HLA-A*24:49 | 312  | IYQTSNFRV    | 0,785  |
| A24 | HLA-A*24:49 | 328  | RFPNITNLCPF  | 0,8789 |
| A24 | HLA-A*24:49 | 346  | RFASVYAW     | 0,521  |
| A24 | HLA-A*24:49 | 368  | LYNSASFSTF   | 0,914  |
| A24 | HLA-A*24:49 | 395  | VYADSFVI     | 0,6394 |
| A24 | HLA-A*24:49 | 448  | NYNLYRLF     | 0,9353 |
| A24 | HLA-A*24:49 | 488  | CYFPLQSYGF   | 0,5885 |
| A24 | HLA-A*24:49 | 489  | YFPLQSYGF    | 0,9442 |
| A24 | HLA-A*24:49 | 504  | GYQPYRVVLSF  | 0,6707 |
| A24 | HLA-A*24:49 | 507  | PYRVVLSF     | 0,8166 |
| A24 | HLA-A*24:49 | 558  | KFLPFQQF     | 0,6948 |
| A24 | HLA-A*24:49 | 634  | RVYSTGSNVF   | 0,7146 |
| A24 | HLA-A*24:49 | 635  | VYSTGSNVF    | 0,9696 |
| A24 | HLA-A*24:49 | 755  | QYGSFCTQL    | 0,5614 |
| A24 | HLA-A*24:49 | 788  | IYKTPPIKDF   | 0,9226 |
| A24 | HLA-A*24:49 | 816  | SFIEDLLF     | 0,7253 |
| A24 | HLA-A*24:49 | 1066 | TYVPAQEKNF   | 0,9479 |
| A24 | HLA-A*24:49 | 1094 | VFVSNQTHW    | 0,8658 |
| A24 | HLA-A*24:49 | 1094 | VFVSNQTHWF   | 0,8335 |
| A24 | HLA-A*24:49 | 1101 | HWFVTQRNF    | 0,754  |
| A24 | HLA-A*24:49 | 1137 | VYDPLQPELDSF | 0,8174 |
| A24 | HLA-A*24:49 | 1208 | QYIKWPWYI    | 0,9613 |
| A24 | HLA-A*24:49 | 1208 | QYIKWPWYIW   | 0,7582 |
| A24 | HLA-A*24:49 | 1211 | KWPWYIWLGF   | 0,6582 |
| B07 | HLA-B*07:02 | 24   | LPPAYTNSF    | 0,5263 |
| B07 | HLA-B*07:02 | 38   | YDPDKVFRSSV  | 0,5308 |
| B07 | HLA-B*07:02 | 208  | TPINLVRDL    | 0,7332 |
| B07 | HLA-B*07:02 | 216  | LPQGFSAL     | 0,6854 |
| B07 | HLA-B*07:02 | 462  | KPFERDISTEI  | 0,6344 |

|     |             |      |              |        |
|-----|-------------|------|--------------|--------|
| B07 | HLA-B*07:02 | 506  | QPYRVVVL     | 0,6389 |
| B07 | HLA-B*07:02 | 526  | GPKKSTNLV    | 0,6037 |
| B07 | HLA-B*07:02 | 620  | VPVAIHADQL   | 0,5101 |
| B07 | HLA-B*07:02 | 680  | SPRRARVA     | 0,7296 |
| B07 | HLA-B*07:02 | 714  | IPTNFTISV    | 0,6596 |
| B07 | HLA-B*07:02 | 1056 | APHGVVFL     | 0,6399 |
| B07 | HLA-B*07:02 | 1261 | SEPVLKGVKL   | 0,6496 |
| B07 | HLA-B*07:03 | 24   | LPPAYTNSF    | 0,6635 |
| B07 | HLA-B*07:03 | 38   | YPDKVFRRSSV  | 0,6468 |
| B07 | HLA-B*07:03 | 38   | YPDKVFRRSSVL | 0,5441 |
| B07 | HLA-B*07:03 | 208  | TPINLVRDL    | 0,7801 |
| B07 | HLA-B*07:03 | 216  | LPQGFSAL     | 0,8331 |
| B07 | HLA-B*07:03 | 462  | KPFERDISTEI  | 0,5705 |
| B07 | HLA-B*07:03 | 506  | QPYRVVVL     | 0,8112 |
| B07 | HLA-B*07:03 | 526  | GPKKSTNL     | 0,5568 |
| B07 | HLA-B*07:03 | 526  | GPKKSTNLV    | 0,6514 |
| B07 | HLA-B*07:03 | 588  | TPCSFGGVSV   | 0,525  |
| B07 | HLA-B*07:03 | 620  | VPVAIHADQL   | 0,5699 |
| B07 | HLA-B*07:03 | 680  | SPRRARVA     | 0,7613 |
| B07 | HLA-B*07:03 | 714  | IPTNFTISV    | 0,7313 |
| B07 | HLA-B*07:03 | 869  | MIAQYTSAL    | 0,584  |
| B07 | HLA-B*07:03 | 1052 | FPQSAPHGV    | 0,5776 |
| B07 | HLA-B*07:03 | 1052 | FPQSAPHGVVF  | 0,6134 |
| B07 | HLA-B*07:03 | 1056 | APHGVVFL     | 0,7644 |
| B07 | HLA-B*07:03 | 1261 | SEPVLKGVKL   | 0,7262 |
| B07 | HLA-B*07:04 | 208  | TPINLVRDL    | 0,6264 |
| B07 | HLA-B*07:04 | 462  | KPFERDISTEI  | 0,5191 |
| B07 | HLA-B*07:04 | 506  | QPYRVVVL     | 0,6271 |
| B07 | HLA-B*07:04 | 526  | GPKKSTNLV    | 0,5173 |
| B07 | HLA-B*07:04 | 680  | SPRRARVA     | 0,6865 |
| B07 | HLA-B*07:04 | 714  | IPTNFTISV    | 0,5207 |
| B07 | HLA-B*07:04 | 1261 | SEPVLKGVKL   | 0,5427 |
| B07 | HLA-B*07:05 | 24   | LPPAYTNSF    | 0,5378 |
| B07 | HLA-B*07:05 | 38   | YPDKVFRRSSV  | 0,6462 |
| B07 | HLA-B*07:05 | 208  | TPINLVRDL    | 0,7572 |
| B07 | HLA-B*07:05 | 216  | LPQGFSAL     | 0,7578 |
| B07 | HLA-B*07:05 | 462  | KPFERDISTEI  | 0,6075 |
| B07 | HLA-B*07:05 | 506  | QPYRVVVL     | 0,7004 |
| B07 | HLA-B*07:05 | 526  | GPKKSTNLV    | 0,6522 |
| B07 | HLA-B*07:05 | 588  | TPCSFGGVSV   | 0,5218 |
| B07 | HLA-B*07:05 | 620  | VPVAIHADQL   | 0,5518 |
| B07 | HLA-B*07:05 | 680  | SPRRARVA     | 0,7396 |
| B07 | HLA-B*07:05 | 714  | IPTNFTISV    | 0,75   |
| B07 | HLA-B*07:05 | 1056 | APHGVVFL     | 0,6769 |
| B07 | HLA-B*07:05 | 1261 | SEPVLKGVKL   | 0,6685 |
| B07 | HLA-B*07:06 | 24   | LPPAYTNSF    | 0,5378 |
| B07 | HLA-B*07:06 | 38   | YPDKVFRRSSV  | 0,6462 |
| B07 | HLA-B*07:06 | 208  | TPINLVRDL    | 0,7572 |
| B07 | HLA-B*07:06 | 216  | LPQGFSAL     | 0,7578 |
| B07 | HLA-B*07:06 | 462  | KPFERDISTEI  | 0,6075 |

|     |             |      |             |        |
|-----|-------------|------|-------------|--------|
| B07 | HLA-B*07:06 | 506  | QPYRVVVL    | 0,7004 |
| B07 | HLA-B*07:06 | 526  | GPKKSTNLV   | 0,6522 |
| B07 | HLA-B*07:06 | 588  | TPCSFGGVS   | 0,5218 |
| B07 | HLA-B*07:06 | 620  | VPVAIHADQL  | 0,5518 |
| B07 | HLA-B*07:06 | 680  | SPRRARVA    | 0,7396 |
| B07 | HLA-B*07:06 | 714  | IPTNFTISV   | 0,75   |
| B07 | HLA-B*07:06 | 1056 | APHGVVFL    | 0,6769 |
| B07 | HLA-B*07:06 | 1261 | SEPVLKGVKL  | 0,6685 |
| B07 | HLA-B*07:15 | 38   | YDPKVFRRSSV | 0,6004 |
| B07 | HLA-B*07:15 | 208  | TPINLVRDL   | 0,7101 |
| B07 | HLA-B*07:15 | 216  | LPQGFSAL    | 0,6649 |
| B07 | HLA-B*07:15 | 506  | QPYRVVVL    | 0,6118 |
| B07 | HLA-B*07:15 | 526  | GPKKSTNLV   | 0,5338 |
| B07 | HLA-B*07:15 | 680  | SPRRARVA    | 0,6589 |
| B07 | HLA-B*07:15 | 714  | IPTNFTISV   | 0,7194 |
| B07 | HLA-B*07:15 | 1052 | FPQSAPHGV   | 0,5075 |
| B07 | HLA-B*07:15 | 1056 | APHGVVFL    | 0,6254 |
| B07 | HLA-B*07:15 | 1261 | SEPVLKGVKL  | 0,5393 |
| B07 | HLA-B*07:19 | 24   | LPPAYTNSF   | 0,5493 |
| B07 | HLA-B*07:19 | 208  | TPINLVRDL   | 0,7209 |
| B07 | HLA-B*07:19 | 216  | LPQGFSAL    | 0,5972 |
| B07 | HLA-B*07:19 | 462  | KPFERDISTEI | 0,5462 |
| B07 | HLA-B*07:19 | 506  | QPYRVVVL    | 0,744  |
| B07 | HLA-B*07:19 | 526  | GPKKSTNLV   | 0,6123 |
| B07 | HLA-B*07:19 | 680  | SPRRARSV    | 0,5347 |
| B07 | HLA-B*07:19 | 680  | SPRRARVA    | 0,7444 |
| B07 | HLA-B*07:19 | 714  | IPTNFTISV   | 0,6042 |
| B07 | HLA-B*07:19 | 1056 | APHGVVFL    | 0,5804 |
| B07 | HLA-B*07:19 | 1261 | SEPVLKGVKL  | 0,6196 |
| B07 | HLA-B*07:20 | 24   | LPPAYTNSF   | 0,5771 |
| B07 | HLA-B*07:20 | 208  | TPINLVRDL   | 0,6858 |
| B07 | HLA-B*07:20 | 216  | LPQGFSAL    | 0,5023 |
| B07 | HLA-B*07:21 | 24   | LPPAYTNSF   | 0,5263 |
| B07 | HLA-B*07:21 | 38   | YDPKVFRRSSV | 0,5308 |
| B07 | HLA-B*07:21 | 208  | TPINLVRDL   | 0,7332 |
| B07 | HLA-B*07:21 | 216  | LPQGFSAL    | 0,6854 |
| B07 | HLA-B*07:21 | 462  | KPFERDISTEI | 0,6344 |
| B07 | HLA-B*07:21 | 506  | QPYRVVVL    | 0,6389 |
| B07 | HLA-B*07:21 | 526  | GPKKSTNLV   | 0,6037 |
| B07 | HLA-B*07:21 | 620  | VPVAIHADQL  | 0,5101 |
| B07 | HLA-B*07:21 | 680  | SPRRARVA    | 0,7296 |
| B07 | HLA-B*07:21 | 714  | IPTNFTISV   | 0,6596 |
| B07 | HLA-B*07:21 | 1056 | APHGVVFL    | 0,6399 |
| B07 | HLA-B*07:21 | 1261 | SEPVLKGVKL  | 0,6496 |
| B07 | HLA-B*07:22 | 24   | LPPAYTNSF   | 0,5263 |
| B07 | HLA-B*07:22 | 38   | YDPKVFRRSSV | 0,5308 |
| B07 | HLA-B*07:22 | 208  | TPINLVRDL   | 0,7332 |
| B07 | HLA-B*07:22 | 216  | LPQGFSAL    | 0,6854 |
| B07 | HLA-B*07:22 | 462  | KPFERDISTEI | 0,6344 |
| B07 | HLA-B*07:22 | 506  | QPYRVVVL    | 0,6389 |

|     |             |      |             |        |
|-----|-------------|------|-------------|--------|
| B07 | HLA-B*07:22 | 526  | GPKKSTNLV   | 0,6037 |
| B07 | HLA-B*07:22 | 620  | VPVAIHADQL  | 0,5101 |
| B07 | HLA-B*07:22 | 680  | SPRRARVA    | 0,7296 |
| B07 | HLA-B*07:22 | 714  | IPTNFTISV   | 0,6596 |
| B07 | HLA-B*07:22 | 1056 | APHGVVFL    | 0,6399 |
| B07 | HLA-B*07:22 | 1261 | SEPVKGVKL   | 0,6496 |
| B07 | HLA-B*07:24 | 24   | LPPAYTNSF   | 0,6317 |
| B07 | HLA-B*07:24 | 38   | YDPKVFSSV   | 0,5009 |
| B07 | HLA-B*07:24 | 84   | LPFNDGVYF   | 0,6784 |
| B07 | HLA-B*07:24 | 208  | TPINLVRDL   | 0,787  |
| B07 | HLA-B*07:24 | 216  | LPQGFSAL    | 0,6678 |
| B07 | HLA-B*07:24 | 506  | QPYRVVVL    | 0,6042 |
| B07 | HLA-B*07:24 | 526  | GPKKSTNLV   | 0,5315 |
| B07 | HLA-B*07:24 | 680  | SPRRARVA    | 0,6404 |
| B07 | HLA-B*07:24 | 714  | IPTNFTISV   | 0,6579 |
| B07 | HLA-B*07:24 | 1052 | FPQSAPHGVV  | 0,5403 |
| B07 | HLA-B*07:24 | 1261 | SEPVKGVKL   | 0,6013 |
| B07 | HLA-B*07:25 | 24   | LPPAYTNSF   | 0,6744 |
| B07 | HLA-B*07:25 | 84   | LPFNDGVYF   | 0,6682 |
| B07 | HLA-B*07:25 | 208  | TPINLVRDL   | 0,7696 |
| B07 | HLA-B*07:25 | 216  | LPQGFSAL    | 0,5739 |
| B07 | HLA-B*07:25 | 506  | QPYRVVVL    | 0,6556 |
| B07 | HLA-B*07:25 | 620  | VPVAIHADQL  | 0,5421 |
| B07 | HLA-B*07:25 | 714  | IPTNFTISV   | 0,6917 |
| B07 | HLA-B*07:25 | 1052 | FPQSAPHGV   | 0,5272 |
| B07 | HLA-B*07:25 | 1052 | FPQSAPHGVV  | 0,524  |
| B07 | HLA-B*07:25 | 1056 | APHGVVFL    | 0,6273 |
| B07 | HLA-B*07:25 | 1261 | SEPVKGVKL   | 0,6103 |
| B07 | HLA-B*07:25 | 1262 | EPVLKGVKL   | 0,6809 |
| B07 | HLA-B*07:26 | 208  | TPINLVRDL   | 0,6472 |
| B07 | HLA-B*07:26 | 506  | QPYRVVVL    | 0,5503 |
| B07 | HLA-B*07:26 | 680  | SPRRARVA    | 0,542  |
| B07 | HLA-B*07:26 | 714  | IPTNFTISV   | 0,5255 |
| B07 | HLA-B*07:30 | 24   | LPPAYTNSF   | 0,5263 |
| B07 | HLA-B*07:30 | 38   | YDPKVFSSV   | 0,5308 |
| B07 | HLA-B*07:30 | 208  | TPINLVRDL   | 0,7332 |
| B07 | HLA-B*07:30 | 216  | LPQGFSAL    | 0,6854 |
| B07 | HLA-B*07:30 | 462  | KPFERDISTEI | 0,6344 |
| B07 | HLA-B*07:30 | 506  | QPYRVVVL    | 0,6389 |
| B07 | HLA-B*07:30 | 526  | GPKKSTNLV   | 0,6037 |
| B07 | HLA-B*07:30 | 620  | VPVAIHADQL  | 0,5101 |
| B07 | HLA-B*07:30 | 680  | SPRRARVA    | 0,7296 |
| B07 | HLA-B*07:30 | 714  | IPTNFTISV   | 0,6596 |
| B07 | HLA-B*07:30 | 1056 | APHGVVFL    | 0,6399 |
| B07 | HLA-B*07:30 | 1261 | SEPVKGVKL   | 0,6496 |
| B07 | HLA-B*07:31 | 24   | LPPAYTNSF   | 0,6652 |
| B07 | HLA-B*07:31 | 38   | YDPKVFSSV   | 0,6505 |
| B07 | HLA-B*07:31 | 84   | LPFNDGVYF   | 0,7128 |
| B07 | HLA-B*07:31 | 208  | TPINLVRDL   | 0,8331 |
| B07 | HLA-B*07:31 | 216  | LPQGFSAL    | 0,8036 |

|     |             |      |             |        |
|-----|-------------|------|-------------|--------|
| B07 | HLA-B*07:31 | 229  | LPIGINITRF  | 0,5034 |
| B07 | HLA-B*07:31 | 462  | KPFERDISTEI | 0,6827 |
| B07 | HLA-B*07:31 | 506  | QPYRVVVL    | 0,7867 |
| B07 | HLA-B*07:31 | 526  | GPKKSTNLV   | 0,7144 |
| B07 | HLA-B*07:31 | 620  | VPVAIHADQL  | 0,6023 |
| B07 | HLA-B*07:31 | 680  | SPRRARVA    | 0,8018 |
| B07 | HLA-B*07:31 | 714  | IPTNFTISV   | 0,7547 |
| B07 | HLA-B*07:31 | 1052 | FPQSAPHGV   | 0,5262 |
| B07 | HLA-B*07:31 | 1052 | FPQSAPHGVVF | 0,5664 |
| B07 | HLA-B*07:31 | 1056 | APHGVVFL    | 0,7394 |
| B07 | HLA-B*07:31 | 1261 | SEPVLKGVKL  | 0,7452 |
| B07 | HLA-B*07:31 | 1262 | EPVLKGVKL   | 0,7089 |
| B07 | HLA-B*07:33 | 24   | LPPAYTNSF   | 0,5263 |
| B07 | HLA-B*07:33 | 38   | YDPKVFRRSSV | 0,5308 |
| B07 | HLA-B*07:33 | 208  | TPINLVRDL   | 0,7332 |
| B07 | HLA-B*07:33 | 216  | LPQGFSAL    | 0,6854 |
| B07 | HLA-B*07:33 | 462  | KPFERDISTEI | 0,6344 |
| B07 | HLA-B*07:33 | 506  | QPYRVVVL    | 0,6389 |
| B07 | HLA-B*07:33 | 526  | GPKKSTNLV   | 0,6037 |
| B07 | HLA-B*07:33 | 620  | VPVAIHADQL  | 0,5101 |
| B07 | HLA-B*07:33 | 680  | SPRRARVA    | 0,7296 |
| B07 | HLA-B*07:33 | 714  | IPTNFTISV   | 0,6596 |
| B07 | HLA-B*07:33 | 1056 | APHGVVFL    | 0,6399 |
| B07 | HLA-B*07:33 | 1261 | SEPVLKGVKL  | 0,6496 |
| B07 | HLA-B*07:34 | 24   | LPPAYTNSF   | 0,5137 |
| B07 | HLA-B*07:34 | 84   | LPFNDGVYF   | 0,6562 |
| B07 | HLA-B*07:34 | 208  | TPINLVRDL   | 0,7702 |
| B07 | HLA-B*07:34 | 216  | LPQGFSAL    | 0,6635 |
| B07 | HLA-B*07:34 | 506  | QPYRVVVL    | 0,7653 |
| B07 | HLA-B*07:34 | 526  | GPKKSTNLV   | 0,5309 |
| B07 | HLA-B*07:34 | 680  | SPRRARVA    | 0,6471 |
| B07 | HLA-B*07:34 | 714  | IPTNFTISV   | 0,7183 |
| B07 | HLA-B*07:34 | 1056 | APHGVVFL    | 0,6103 |
| B07 | HLA-B*07:34 | 1261 | SEPVLKGVKL  | 0,5539 |
| B07 | HLA-B*07:35 | 24   | LPPAYTNSF   | 0,5263 |
| B07 | HLA-B*07:35 | 38   | YDPKVFRRSSV | 0,5308 |
| B07 | HLA-B*07:35 | 208  | TPINLVRDL   | 0,7332 |
| B07 | HLA-B*07:35 | 216  | LPQGFSAL    | 0,6854 |
| B07 | HLA-B*07:35 | 462  | KPFERDISTEI | 0,6344 |
| B07 | HLA-B*07:35 | 506  | QPYRVVVL    | 0,6389 |
| B07 | HLA-B*07:35 | 526  | GPKKSTNLV   | 0,6037 |
| B07 | HLA-B*07:35 | 620  | VPVAIHADQL  | 0,5101 |
| B07 | HLA-B*07:35 | 680  | SPRRARVA    | 0,7296 |
| B07 | HLA-B*07:35 | 714  | IPTNFTISV   | 0,6596 |
| B07 | HLA-B*07:35 | 1056 | APHGVVFL    | 0,6399 |
| B07 | HLA-B*07:35 | 1261 | SEPVLKGVKL  | 0,6496 |
| B07 | HLA-B*07:39 | 24   | LPPAYTNSF   | 0,5263 |
| B07 | HLA-B*07:39 | 38   | YDPKVFRRSSV | 0,5308 |
| B07 | HLA-B*07:39 | 208  | TPINLVRDL   | 0,7332 |
| B07 | HLA-B*07:39 | 216  | LPQGFSAL    | 0,6854 |



|     |             |      |             |        |
|-----|-------------|------|-------------|--------|
| B07 | HLA-B*07:39 | 462  | KPFERDISTEI | 0,6344 |
| B07 | HLA-B*07:39 | 506  | QPYRVVVL    | 0,6389 |
| B07 | HLA-B*07:39 | 526  | GPKKSTNLV   | 0,6037 |
| B07 | HLA-B*07:39 | 620  | VPVAIHADQL  | 0,5101 |
| B07 | HLA-B*07:39 | 680  | SPRRAROVA   | 0,7296 |
| B07 | HLA-B*07:39 | 714  | IPTNFTISV   | 0,6596 |
| B07 | HLA-B*07:39 | 1056 | APHGVVFL    | 0,6399 |
| B07 | HLA-B*07:39 | 1261 | SEPVKGVKL   | 0,6496 |
| B07 | HLA-B*07:40 | 24   | LPPAYTNSF   | 0,5378 |
| B07 | HLA-B*07:40 | 38   | YDPKVFRSSV  | 0,6462 |
| B07 | HLA-B*07:40 | 208  | TPINLVRDL   | 0,7572 |
| B07 | HLA-B*07:40 | 216  | LPQGFSAL    | 0,7578 |
| B07 | HLA-B*07:40 | 462  | KPFERDISTEI | 0,6075 |
| B07 | HLA-B*07:40 | 506  | QPYRVVVL    | 0,7004 |
| B07 | HLA-B*07:40 | 526  | GPKKSTNLV   | 0,6522 |
| B07 | HLA-B*07:40 | 588  | TPCSFGGVS   | 0,5218 |
| B07 | HLA-B*07:40 | 620  | VPVAIHADQL  | 0,5518 |
| B07 | HLA-B*07:40 | 680  | SPRRAROVA   | 0,7396 |
| B07 | HLA-B*07:40 | 714  | IPTNFTISV   | 0,75   |
| B07 | HLA-B*07:40 | 1056 | APHGVVFL    | 0,6769 |
| B07 | HLA-B*07:40 | 1261 | SEPVKGVKL   | 0,6685 |
| B07 | HLA-B*07:41 | 24   | LPPAYTNSF   | 0,5263 |
| B07 | HLA-B*07:41 | 38   | YDPKVFRSSV  | 0,5308 |
| B07 | HLA-B*07:41 | 208  | TPINLVRDL   | 0,7332 |
| B07 | HLA-B*07:41 | 216  | LPQGFSAL    | 0,6854 |
| B07 | HLA-B*07:41 | 462  | KPFERDISTEI | 0,6344 |
| B07 | HLA-B*07:41 | 506  | QPYRVVVL    | 0,6389 |
| B07 | HLA-B*07:41 | 526  | GPKKSTNLV   | 0,6037 |
| B07 | HLA-B*07:41 | 620  | VPVAIHADQL  | 0,5101 |
| B07 | HLA-B*07:41 | 680  | SPRRAROVA   | 0,7296 |
| B07 | HLA-B*07:41 | 714  | IPTNFTISV   | 0,6596 |
| B07 | HLA-B*07:41 | 1056 | APHGVVFL    | 0,6399 |
| B07 | HLA-B*07:41 | 1261 | SEPVKGVKL   | 0,6496 |
| B07 | HLA-B*07:42 | 24   | LPPAYTNSF   | 0,5263 |
| B07 | HLA-B*07:42 | 38   | YDPKVFRSSV  | 0,5308 |
| B07 | HLA-B*07:42 | 208  | TPINLVRDL   | 0,7332 |
| B07 | HLA-B*07:42 | 216  | LPQGFSAL    | 0,6854 |
| B07 | HLA-B*07:42 | 462  | KPFERDISTEI | 0,6344 |
| B07 | HLA-B*07:42 | 506  | QPYRVVVL    | 0,6389 |
| B07 | HLA-B*07:42 | 526  | GPKKSTNLV   | 0,6037 |
| B07 | HLA-B*07:42 | 620  | VPVAIHADQL  | 0,5101 |
| B07 | HLA-B*07:42 | 680  | SPRRAROVA   | 0,7296 |
| B07 | HLA-B*07:42 | 714  | IPTNFTISV   | 0,6596 |
| B07 | HLA-B*07:42 | 1056 | APHGVVFL    | 0,6399 |
| B07 | HLA-B*07:42 | 1261 | SEPVKGVKL   | 0,6496 |
| B07 | HLA-B*07:43 | 84   | LPFNDGVYF   | 0,6105 |
| B07 | HLA-B*07:43 | 208  | TPINLVRDL   | 0,7315 |
| B07 | HLA-B*07:43 | 216  | LPQGFSAL    | 0,5483 |
| B07 | HLA-B*07:43 | 506  | QPYRVVVL    | 0,6776 |
| B07 | HLA-B*07:43 | 680  | SPRRAROVA   | 0,6226 |

|     |             |      |             |        |
|-----|-------------|------|-------------|--------|
| B07 | HLA-B*07:43 | 714  | IPTNFTISV   | 0,6031 |
| B07 | HLA-B*15:08 | 84   | LPFNDGVYF   | 0,6442 |
| B07 | HLA-B*15:08 | 192  | FVFKNIDGY   | 0,5399 |
| B07 | HLA-B*15:08 | 687  | VASQSIIAY   | 0,7217 |
| B07 | HLA-B*15:08 | 699  | LGAENSVAY   | 0,5058 |
| B07 | HLA-B*15:08 | 896  | IPFAMQMAY   | 0,7301 |
| B07 | HLA-B*15:08 | 1054 | QSAPHGVVF   | 0,5652 |
| B07 | HLA-B*35:01 | 24   | LPPAYTNSF   | 0,8786 |
| B07 | HLA-B*35:01 | 30   | NSFTRGVYY   | 0,5335 |
| B07 | HLA-B*35:01 | 56   | LPFFSNVTW   | 0,8069 |
| B07 | HLA-B*35:01 | 83   | VLPFNDGVYF  | 0,7228 |
| B07 | HLA-B*35:01 | 84   | LPFNDGVY    | 0,824  |
| B07 | HLA-B*35:01 | 84   | LPFNDGVYF   | 0,9877 |
| B07 | HLA-B*35:01 | 162  | SANNCTFEY   | 0,6698 |
| B07 | HLA-B*35:01 | 192  | FVFKNIDGY   | 0,7837 |
| B07 | HLA-B*35:01 | 229  | LPIGINITRF  | 0,8394 |
| B07 | HLA-B*35:01 | 258  | WTAGAAAYY   | 0,5393 |
| B07 | HLA-B*35:01 | 271  | QPRTFLLKY   | 0,6565 |
| B07 | HLA-B*35:01 | 321  | QPTESIVRF   | 0,9476 |
| B07 | HLA-B*35:01 | 343  | NATRFASVY   | 0,7573 |
| B07 | HLA-B*35:01 | 361  | CVADYSVLY   | 0,5167 |
| B07 | HLA-B*35:01 | 478  | TPCNGVEGF   | 0,5961 |
| B07 | HLA-B*35:01 | 604  | TSNQVAVLY   | 0,5492 |
| B07 | HLA-B*35:01 | 625  | HADQLTPTW   | 0,7176 |
| B07 | HLA-B*35:01 | 664  | IPIGAGICASY | 0,8514 |
| B07 | HLA-B*35:01 | 687  | VASQSIIAY   | 0,9634 |
| B07 | HLA-B*35:01 | 699  | LGAENSVAY   | 0,8303 |
| B07 | HLA-B*35:01 | 714  | IPTNFTISV   | 0,5007 |
| B07 | HLA-B*35:01 | 861  | LPPLLTDEM   | 0,6186 |
| B07 | HLA-B*35:01 | 865  | LTDEMIAQY   | 0,6118 |
| B07 | HLA-B*35:01 | 892  | AALQIPFAM   | 0,5789 |
| B07 | HLA-B*35:01 | 895  | QIPFAMQMAY  | 0,6098 |
| B07 | HLA-B*35:01 | 896  | IPFAMQMAY   | 0,9872 |
| B07 | HLA-B*35:01 | 898  | FAMQMAYRF   | 0,7448 |
| B07 | HLA-B*35:01 | 1052 | FPQSAPHGVVF | 0,8504 |
| B07 | HLA-B*35:01 | 1054 | QSAPHGVVF   | 0,6307 |
| B07 | HLA-B*35:01 | 1095 | FVSNNGTHWF  | 0,5997 |
| B07 | HLA-B*35:03 | 84   | LPFNDGVYF   | 0,8449 |
| B07 | HLA-B*35:03 | 714  | IPTNFTISV   | 0,6549 |
| B07 | HLA-B*35:03 | 861  | LPPLLTDEM   | 0,674  |
| B07 | HLA-B*35:03 | 1052 | FPQSAPHGVVF | 0,6557 |
| B07 | HLA-B*35:07 | 24   | LPPAYTNSF   | 0,8786 |
| B07 | HLA-B*35:07 | 30   | NSFTRGVYY   | 0,5335 |
| B07 | HLA-B*35:07 | 56   | LPFFSNVTW   | 0,8069 |
| B07 | HLA-B*35:07 | 83   | VLPFNDGVYF  | 0,7228 |
| B07 | HLA-B*35:07 | 84   | LPFNDGVY    | 0,824  |
| B07 | HLA-B*35:07 | 84   | LPFNDGVYF   | 0,9877 |
| B07 | HLA-B*35:07 | 162  | SANNCTFEY   | 0,6698 |
| B07 | HLA-B*35:07 | 192  | FVFKNIDGY   | 0,7837 |
| B07 | HLA-B*35:07 | 229  | LPIGINITRF  | 0,8394 |

|     |             |      |             |        |
|-----|-------------|------|-------------|--------|
| B07 | HLA-B*35:07 | 258  | WTAGAAAYY   | 0,5393 |
| B07 | HLA-B*35:07 | 271  | QPRTFLLKY   | 0,6565 |
| B07 | HLA-B*35:07 | 321  | QPTESIVRF   | 0,9476 |
| B07 | HLA-B*35:07 | 343  | NATRFASVY   | 0,7573 |
| B07 | HLA-B*35:07 | 361  | CVADYSVLY   | 0,5167 |
| B07 | HLA-B*35:07 | 478  | TPCNGVEGF   | 0,5961 |
| B07 | HLA-B*35:07 | 604  | TSNQVAVLY   | 0,5492 |
| B07 | HLA-B*35:07 | 625  | HADQLTPTW   | 0,7176 |
| B07 | HLA-B*35:07 | 664  | IPIGAGICASY | 0,8514 |
| B07 | HLA-B*35:07 | 687  | VASQSIAY    | 0,9634 |
| B07 | HLA-B*35:07 | 699  | LGAENSVAY   | 0,8303 |
| B07 | HLA-B*35:07 | 714  | IPTNFTISV   | 0,5007 |
| B07 | HLA-B*35:07 | 861  | LPPLLTDEM   | 0,6186 |
| B07 | HLA-B*35:07 | 865  | LTDEMIAQY   | 0,6118 |
| B07 | HLA-B*35:07 | 892  | AALQIPFAM   | 0,5789 |
| B07 | HLA-B*35:07 | 895  | QIPFAMQMAY  | 0,6098 |
| B07 | HLA-B*35:07 | 896  | IPFAMQMAY   | 0,9872 |
| B07 | HLA-B*35:07 | 898  | FAMQMAYRF   | 0,7448 |
| B07 | HLA-B*35:07 | 1052 | FPQSAPHGVVF | 0,8504 |
| B07 | HLA-B*35:07 | 1054 | QSAPHGVVF   | 0,6307 |
| B07 | HLA-B*35:07 | 1095 | FVSNNGTHWF  | 0,5997 |
| B07 | HLA-B*35:08 | 24   | LPPAYTNSF   | 0,797  |
| B07 | HLA-B*35:08 | 56   | LPFFSNVTW   | 0,7097 |
| B07 | HLA-B*35:08 | 84   | LPFNDGVY    | 0,6312 |
| B07 | HLA-B*35:08 | 84   | LPFNDGVYF   | 0,9511 |
| B07 | HLA-B*35:08 | 162  | SANNCTFEY   | 0,5112 |
| B07 | HLA-B*35:08 | 229  | LPIGINITRF  | 0,6418 |
| B07 | HLA-B*35:08 | 321  | QPTESIVRF   | 0,8721 |
| B07 | HLA-B*35:08 | 343  | NATRFASVY   | 0,5359 |
| B07 | HLA-B*35:08 | 664  | IPIGAGICASY | 0,6771 |
| B07 | HLA-B*35:08 | 687  | VASQSIAY    | 0,8861 |
| B07 | HLA-B*35:08 | 699  | LGAENSVAY   | 0,6356 |
| B07 | HLA-B*35:08 | 861  | LPPLLTDEM   | 0,5504 |
| B07 | HLA-B*35:08 | 896  | IPFAMQMAY   | 0,9572 |
| B07 | HLA-B*35:08 | 1052 | FPQSAPHGVVF | 0,787  |
| B07 | HLA-B*35:11 | 24   | LPPAYTNSF   | 0,8352 |
| B07 | HLA-B*35:11 | 30   | NSFTRGVYY   | 0,7008 |
| B07 | HLA-B*35:11 | 56   | LPFFSNVTW   | 0,6542 |
| B07 | HLA-B*35:11 | 83   | VLPFNDGVYF  | 0,6879 |
| B07 | HLA-B*35:11 | 84   | LPFNDGVY    | 0,8263 |
| B07 | HLA-B*35:11 | 84   | LPFNDGVYF   | 0,9718 |
| B07 | HLA-B*35:11 | 160  | YSSANNCTF   | 0,5303 |
| B07 | HLA-B*35:11 | 162  | SANNCTFEY   | 0,5536 |
| B07 | HLA-B*35:11 | 192  | FVFKNIDGY   | 0,7481 |
| B07 | HLA-B*35:11 | 212  | LVRDLPGGF   | 0,575  |
| B07 | HLA-B*35:11 | 229  | LPIGINITRF  | 0,775  |
| B07 | HLA-B*35:11 | 258  | WTAGAAAYY   | 0,5592 |
| B07 | HLA-B*35:11 | 261  | GAAAYYVGY   | 0,5071 |
| B07 | HLA-B*35:11 | 271  | QPRTFLLKY   | 0,8033 |
| B07 | HLA-B*35:11 | 321  | QPTESIVRF   | 0,879  |

|     |             |      |             |        |
|-----|-------------|------|-------------|--------|
| B07 | HLA-B*35:11 | 343  | NATRFASVY   | 0,812  |
| B07 | HLA-B*35:11 | 366  | SVLYNSASF   | 0,7009 |
| B07 | HLA-B*35:11 | 604  | TSNQVAVLY   | 0,5291 |
| B07 | HLA-B*35:11 | 664  | IPIGAGICASY | 0,8485 |
| B07 | HLA-B*35:11 | 686  | SVASQSIIAY  | 0,5827 |
| B07 | HLA-B*35:11 | 687  | VASQSIIAY   | 0,9537 |
| B07 | HLA-B*35:11 | 699  | LGAENSVAY   | 0,8145 |
| B07 | HLA-B*35:11 | 710  | NSIAIPTNF   | 0,608  |
| B07 | HLA-B*35:11 | 865  | LTDEMIAQY   | 0,5297 |
| B07 | HLA-B*35:11 | 869  | MIAQYTSAL   | 0,5203 |
| B07 | HLA-B*35:11 | 886  | WTFGAGAAL   | 0,5144 |
| B07 | HLA-B*35:11 | 892  | AALQIPFAM   | 0,6266 |
| B07 | HLA-B*35:11 | 895  | QIPFAMQMAY  | 0,6561 |
| B07 | HLA-B*35:11 | 896  | IPFAMQMAY   | 0,9842 |
| B07 | HLA-B*35:11 | 898  | FAMQMAYRF   | 0,6952 |
| B07 | HLA-B*35:11 | 1021 | SANLAATKM   | 0,6657 |
| B07 | HLA-B*35:11 | 1052 | FPQSAPHGVVF | 0,7606 |
| B07 | HLA-B*35:11 | 1054 | QSAPHGVVF   | 0,7902 |
| B07 | HLA-B*35:11 | 1095 | FVSNATHWF   | 0,6488 |
| B07 | HLA-B*35:11 | 1113 | QIITDNTF    | 0,5819 |
| B07 | HLA-B*35:14 | 24   | LPPAYTNSF   | 0,7489 |
| B07 | HLA-B*35:14 | 84   | LPFNDGVY    | 0,6173 |
| B07 | HLA-B*35:14 | 84   | LPFNDGVYF   | 0,8767 |
| B07 | HLA-B*35:14 | 192  | FVFKNIDGY   | 0,677  |
| B07 | HLA-B*35:14 | 229  | LPIGINITRF  | 0,6057 |
| B07 | HLA-B*35:14 | 258  | WTAGAAAYY   | 0,5528 |
| B07 | HLA-B*35:14 | 343  | NATRFASVY   | 0,7039 |
| B07 | HLA-B*35:14 | 366  | SVLYNSASF   | 0,5417 |
| B07 | HLA-B*35:14 | 664  | IPIGAGICASY | 0,6706 |
| B07 | HLA-B*35:14 | 686  | SVASQSIIAY  | 0,5487 |
| B07 | HLA-B*35:14 | 687  | VASQSIIAY   | 0,8589 |
| B07 | HLA-B*35:14 | 699  | LGAENSVAY   | 0,6846 |
| B07 | HLA-B*35:14 | 896  | IPFAMQMAY   | 0,9083 |
| B07 | HLA-B*35:14 | 898  | FAMQMAYRF   | 0,501  |
| B07 | HLA-B*35:14 | 1052 | FPQSAPHGVVF | 0,5835 |
| B07 | HLA-B*35:14 | 1054 | QSAPHGVVF   | 0,6632 |
| B07 | HLA-B*35:14 | 1095 | FVSNATHWF   | 0,5633 |
| B07 | HLA-B*35:15 | 24   | LPPAYTNSF   | 0,7919 |
| B07 | HLA-B*35:15 | 56   | LPFFSNVTW   | 0,7224 |
| B07 | HLA-B*35:15 | 83   | VLPFNDGVYF  | 0,6829 |
| B07 | HLA-B*35:15 | 84   | LPFNDGVY    | 0,7275 |
| B07 | HLA-B*35:15 | 84   | LPFNDGVYF   | 0,9676 |
| B07 | HLA-B*35:15 | 162  | SANNCTFEY   | 0,5711 |
| B07 | HLA-B*35:15 | 192  | FVFKNIDGY   | 0,5935 |
| B07 | HLA-B*35:15 | 229  | LPIGINITRF  | 0,7637 |
| B07 | HLA-B*35:15 | 321  | QPTESIVRF   | 0,8872 |
| B07 | HLA-B*35:15 | 343  | NATRFASVY   | 0,5685 |
| B07 | HLA-B*35:15 | 664  | IPIGAGICASY | 0,7825 |
| B07 | HLA-B*35:15 | 687  | VASQSIIAY   | 0,9029 |
| B07 | HLA-B*35:15 | 699  | LGAENSVAY   | 0,6765 |

|     |             |      |             |        |
|-----|-------------|------|-------------|--------|
| B07 | HLA-B*35:15 | 714  | IPTNFTISV   | 0,5146 |
| B07 | HLA-B*35:15 | 861  | LPPLLTDEM   | 0,5696 |
| B07 | HLA-B*35:15 | 892  | AALQIPFAM   | 0,6734 |
| B07 | HLA-B*35:15 | 895  | QIPFAMQMAY  | 0,5998 |
| B07 | HLA-B*35:15 | 896  | IPFAMQMAY   | 0,9714 |
| B07 | HLA-B*35:15 | 898  | FAMQMAYRF   | 0,665  |
| B07 | HLA-B*35:15 | 1052 | FPQSAPHGVVF | 0,781  |
| B07 | HLA-B*35:15 | 1054 | QSAPHGVVF   | 0,5581 |
| B07 | HLA-B*35:21 | 24   | LPPAYTNSF   | 0,8395 |
| B07 | HLA-B*35:21 | 30   | NSFTRGVYY   | 0,7343 |
| B07 | HLA-B*35:21 | 56   | LPFFSNVTW   | 0,7008 |
| B07 | HLA-B*35:21 | 83   | VLPFNDGVYF  | 0,6004 |
| B07 | HLA-B*35:21 | 84   | LPFNDGVY    | 0,8356 |
| B07 | HLA-B*35:21 | 84   | LPFNDGVYF   | 0,9541 |
| B07 | HLA-B*35:21 | 138  | DPFLGVYY    | 0,7423 |
| B07 | HLA-B*35:21 | 192  | FVFKNIDGY   | 0,6843 |
| B07 | HLA-B*35:21 | 229  | LPIGINITRF  | 0,7683 |
| B07 | HLA-B*35:21 | 271  | QPRTFLLKY   | 0,8503 |
| B07 | HLA-B*35:21 | 321  | QPTESIVRF   | 0,8652 |
| B07 | HLA-B*35:21 | 343  | NATRFASVY   | 0,817  |
| B07 | HLA-B*35:21 | 366  | SVLYNSASF   | 0,6264 |
| B07 | HLA-B*35:21 | 487  | NCYFPLQSY   | 0,57   |
| B07 | HLA-B*35:21 | 490  | FPLQSYGF    | 0,5592 |
| B07 | HLA-B*35:21 | 664  | IPIGAGICASY | 0,8085 |
| B07 | HLA-B*35:21 | 686  | SVASQSIAY   | 0,5007 |
| B07 | HLA-B*35:21 | 687  | VASQSIAY    | 0,9249 |
| B07 | HLA-B*35:21 | 699  | LGAENSVAY   | 0,7697 |
| B07 | HLA-B*35:21 | 869  | MIAQYTSAL   | 0,5073 |
| B07 | HLA-B*35:21 | 892  | AALQIPFAM   | 0,5807 |
| B07 | HLA-B*35:21 | 895  | QIPFAMQMAY  | 0,688  |
| B07 | HLA-B*35:21 | 896  | IPFAMQMAY   | 0,9842 |
| B07 | HLA-B*35:21 | 897  | PFAMQMAY    | 0,6134 |
| B07 | HLA-B*35:21 | 898  | FAMQMAYRF   | 0,7194 |
| B07 | HLA-B*35:21 | 1021 | SANLAATKM   | 0,5645 |
| B07 | HLA-B*35:21 | 1052 | FPQSAPHGVVF | 0,7764 |
| B07 | HLA-B*35:21 | 1054 | QSAPHGVVF   | 0,7008 |
| B07 | HLA-B*35:21 | 1095 | FVSNNGTHWF  | 0,5717 |
| B07 | HLA-B*35:21 | 1130 | IGIVNNTVY   | 0,5011 |
| B07 | HLA-B*35:22 | 24   | LPPAYTNSF   | 0,6758 |
| B07 | HLA-B*35:22 | 84   | LPFNDGVYF   | 0,8301 |
| B07 | HLA-B*35:22 | 216  | LPQGFSAL    | 0,5263 |
| B07 | HLA-B*35:22 | 714  | IPTNFTISV   | 0,8019 |
| B07 | HLA-B*35:22 | 861  | LPPLLTDEM   | 0,6575 |
| B07 | HLA-B*35:22 | 896  | IPFAMQMAY   | 0,568  |
| B07 | HLA-B*35:22 | 1052 | FPQSAPHGV   | 0,7661 |
| B07 | HLA-B*35:22 | 1052 | FPQSAPHGVVF | 0,6166 |
| B07 | HLA-B*35:24 | 24   | LPPAYTNSF   | 0,8659 |
| B07 | HLA-B*35:24 | 30   | NSFTRGVYY   | 0,6    |
| B07 | HLA-B*35:24 | 56   | LPFFSNVTW   | 0,8189 |
| B07 | HLA-B*35:24 | 56   | LPFFSNVTWF  | 0,517  |

|     |             |      |             |        |
|-----|-------------|------|-------------|--------|
| B07 | HLA-B*35:24 | 83   | VLPFNDGVYF  | 0,6239 |
| B07 | HLA-B*35:24 | 84   | LPFNDGVY    | 0,8242 |
| B07 | HLA-B*35:24 | 84   | LPFNDGVYF   | 0,9759 |
| B07 | HLA-B*35:24 | 138  | DPFLGVYY    | 0,7649 |
| B07 | HLA-B*35:24 | 138  | DPFLGVYYH   | 0,6062 |
| B07 | HLA-B*35:24 | 162  | SANNCTFEY   | 0,5434 |
| B07 | HLA-B*35:24 | 192  | FVFKNIDGY   | 0,6882 |
| B07 | HLA-B*35:24 | 229  | LPIGINITRF  | 0,8081 |
| B07 | HLA-B*35:24 | 271  | QPRTFLLKY   | 0,7209 |
| B07 | HLA-B*35:24 | 321  | QPTESIVRF   | 0,9142 |
| B07 | HLA-B*35:24 | 343  | NATRFASVY   | 0,7681 |
| B07 | HLA-B*35:24 | 490  | FPLQSYGF    | 0,6001 |
| B07 | HLA-B*35:24 | 604  | TSNQVAVLY   | 0,5175 |
| B07 | HLA-B*35:24 | 625  | HADQLTPTW   | 0,6622 |
| B07 | HLA-B*35:24 | 664  | IPIGAGICASY | 0,7856 |
| B07 | HLA-B*35:24 | 687  | VASQSIAY    | 0,9318 |
| B07 | HLA-B*35:24 | 699  | LGAENSVAY   | 0,7685 |
| B07 | HLA-B*35:24 | 714  | IPTNFTISV   | 0,5262 |
| B07 | HLA-B*35:24 | 861  | LPPLLTDEM   | 0,5723 |
| B07 | HLA-B*35:24 | 865  | LTDEMIAQY   | 0,5411 |
| B07 | HLA-B*35:24 | 892  | AALQIPFAM   | 0,5331 |
| B07 | HLA-B*35:24 | 895  | QIPFAMQMAY  | 0,6479 |
| B07 | HLA-B*35:24 | 896  | IPFAMQMAY   | 0,987  |
| B07 | HLA-B*35:24 | 897  | PFAMQMAY    | 0,5448 |
| B07 | HLA-B*35:24 | 898  | FAMQMAYRF   | 0,7695 |
| B07 | HLA-B*35:24 | 1052 | FPQSAPHGVVF | 0,8489 |
| B07 | HLA-B*35:24 | 1054 | QSAPHGVVF   | 0,5377 |
| B07 | HLA-B*35:24 | 1095 | FVSNNGTHWF  | 0,5268 |
| B07 | HLA-B*35:31 | 38   | YDPKVFRSSVL | 0,5154 |
| B07 | HLA-B*35:31 | 84   | LPFNDGVYF   | 0,7397 |
| B07 | HLA-B*35:31 | 216  | LPQGFSAL    | 0,5549 |
| B07 | HLA-B*35:31 | 714  | IPTNFTISV   | 0,825  |
| B07 | HLA-B*35:31 | 861  | LPPLLTDEM   | 0,5885 |
| B07 | HLA-B*35:31 | 892  | AALQIPFAM   | 0,5669 |
| B07 | HLA-B*35:31 | 1052 | FPQSAPHGV   | 0,7222 |
| B07 | HLA-B*35:31 | 1052 | FPQSAPHGVVF | 0,5623 |
| B07 | HLA-B*35:32 | 24   | LPPAYTNSF   | 0,9052 |
| B07 | HLA-B*35:32 | 30   | NSFTRGVYY   | 0,5702 |
| B07 | HLA-B*35:32 | 56   | LPFFSNVTW   | 0,8087 |
| B07 | HLA-B*35:32 | 56   | LPFFSNVTWF  | 0,5164 |
| B07 | HLA-B*35:32 | 83   | VLPFNDGVYF  | 0,7561 |
| B07 | HLA-B*35:32 | 84   | LPFNDGVY    | 0,8314 |
| B07 | HLA-B*35:32 | 84   | LPFNDGVYF   | 0,9881 |
| B07 | HLA-B*35:32 | 160  | YSSANNCTF   | 0,5049 |
| B07 | HLA-B*35:32 | 162  | SANNCTFEY   | 0,7098 |
| B07 | HLA-B*35:32 | 192  | FVFKNIDGY   | 0,8032 |
| B07 | HLA-B*35:32 | 229  | LPIGINITRF  | 0,8498 |
| B07 | HLA-B*35:32 | 258  | WTAGAAAYY   | 0,5683 |
| B07 | HLA-B*35:32 | 271  | QPRTFLLKY   | 0,6724 |
| B07 | HLA-B*35:32 | 321  | QPTESIVRF   | 0,9486 |

|     |             |      |              |        |
|-----|-------------|------|--------------|--------|
| B07 | HLA-B*35:32 | 343  | NATRFASVY    | 0,7659 |
| B07 | HLA-B*35:32 | 361  | CVADYSVLY    | 0,53   |
| B07 | HLA-B*35:32 | 478  | TPCNGVEGF    | 0,6358 |
| B07 | HLA-B*35:32 | 490  | FPLQSYGF     | 0,5082 |
| B07 | HLA-B*35:32 | 604  | TSNQVAVLY    | 0,5842 |
| B07 | HLA-B*35:32 | 625  | HADQLTPTW    | 0,7442 |
| B07 | HLA-B*35:32 | 664  | IPIGAGICASY  | 0,8564 |
| B07 | HLA-B*35:32 | 686  | SVASQSIIAY   | 0,5225 |
| B07 | HLA-B*35:32 | 687  | VASQSIIAY    | 0,9698 |
| B07 | HLA-B*35:32 | 699  | LGAENSVAY    | 0,863  |
| B07 | HLA-B*35:32 | 710  | NSIAIPTNF    | 0,5244 |
| B07 | HLA-B*35:32 | 714  | IPTNFTISV    | 0,5438 |
| B07 | HLA-B*35:32 | 861  | LPPLLTDEM    | 0,6652 |
| B07 | HLA-B*35:32 | 865  | LTDEMIAQY    | 0,6517 |
| B07 | HLA-B*35:32 | 892  | AALQIPFAM    | 0,6373 |
| B07 | HLA-B*35:32 | 895  | QIPFAMQMAY   | 0,599  |
| B07 | HLA-B*35:32 | 896  | IPFAMQMAY    | 0,9853 |
| B07 | HLA-B*35:32 | 898  | FAMQMAYRF    | 0,7754 |
| B07 | HLA-B*35:32 | 1021 | SANLAATKM    | 0,5136 |
| B07 | HLA-B*35:32 | 1052 | FPQSAPHGV    | 0,5544 |
| B07 | HLA-B*35:32 | 1052 | FPQSAPHGVSF  | 0,8763 |
| B07 | HLA-B*35:32 | 1054 | QSAPHGVSF    | 0,697  |
| B07 | HLA-B*35:32 | 1095 | FVSNATHWF    | 0,6496 |
| B07 | HLA-B*35:32 | 1113 | QIITDNTF     | 0,5211 |
| B07 | HLA-B*35:33 | 714  | IPTNFTISV    | 0,6955 |
| B07 | HLA-B*35:33 | 861  | LPPLLTDEM    | 0,589  |
| B07 | HLA-B*35:35 | 24   | LPPAYTNSF    | 0,8931 |
| B07 | HLA-B*35:35 | 30   | NSFTRGVYY    | 0,6432 |
| B07 | HLA-B*35:35 | 38   | YDPKVFSS     | 0,5022 |
| B07 | HLA-B*35:35 | 56   | LPFFSNVTW    | 0,8081 |
| B07 | HLA-B*35:35 | 56   | LPFFSNVTWF   | 0,5997 |
| B07 | HLA-B*35:35 | 81   | NPVLPFNDGVYF | 0,5813 |
| B07 | HLA-B*35:35 | 83   | VLPFNDGVYF   | 0,7798 |
| B07 | HLA-B*35:35 | 84   | LPFNDGVY     | 0,8427 |
| B07 | HLA-B*35:35 | 84   | LPFNDGVYF    | 0,987  |
| B07 | HLA-B*35:35 | 160  | YSSANNCTF    | 0,5537 |
| B07 | HLA-B*35:35 | 162  | SANNCTFEY    | 0,7379 |
| B07 | HLA-B*35:35 | 192  | FVFKNIDGY    | 0,7847 |
| B07 | HLA-B*35:35 | 196  | NIDGYFKIY    | 0,5682 |
| B07 | HLA-B*35:35 | 229  | LPIGINTRF    | 0,8518 |
| B07 | HLA-B*35:35 | 258  | WTAGAAAYY    | 0,6006 |
| B07 | HLA-B*35:35 | 261  | GAAAYYVGY    | 0,5655 |
| B07 | HLA-B*35:35 | 271  | QPRTFLLKY    | 0,7481 |
| B07 | HLA-B*35:35 | 321  | QPTESIVRF    | 0,9497 |
| B07 | HLA-B*35:35 | 329  | FPNITNLCPF   | 0,5517 |
| B07 | HLA-B*35:35 | 343  | NATRFASVY    | 0,791  |
| B07 | HLA-B*35:35 | 361  | CVADYSVLY    | 0,579  |
| B07 | HLA-B*35:35 | 366  | SVLYNSASF    | 0,6081 |
| B07 | HLA-B*35:35 | 392  | FTNVYADSF    | 0,5023 |
| B07 | HLA-B*35:35 | 462  | KPFERDISTEY  | 0,6963 |

|     |             |      |              |        |
|-----|-------------|------|--------------|--------|
| B07 | HLA-B*35:35 | 478  | TPCNGVEGF    | 0,6736 |
| B07 | HLA-B*35:35 | 490  | FPLQSYGF     | 0,6408 |
| B07 | HLA-B*35:35 | 604  | TSNQVAVLY    | 0,653  |
| B07 | HLA-B*35:35 | 625  | HADQLTPTW    | 0,77   |
| B07 | HLA-B*35:35 | 652  | GAEHVNNSY    | 0,6983 |
| B07 | HLA-B*35:35 | 664  | IPIGAGICASY  | 0,8472 |
| B07 | HLA-B*35:35 | 686  | SVASQSIIAY   | 0,5942 |
| B07 | HLA-B*35:35 | 687  | VASQSIIAY    | 0,9671 |
| B07 | HLA-B*35:35 | 699  | LGAENSVAY    | 0,8503 |
| B07 | HLA-B*35:35 | 710  | NSIAIPTNF    | 0,6147 |
| B07 | HLA-B*35:35 | 714  | IPTNFTISV    | 0,6668 |
| B07 | HLA-B*35:35 | 861  | LPPLLTDEM    | 0,6989 |
| B07 | HLA-B*35:35 | 865  | LTDEMIAQY    | 0,7051 |
| B07 | HLA-B*35:35 | 869  | MIAQYTSAL    | 0,5063 |
| B07 | HLA-B*35:35 | 886  | WTFGAGAAL    | 0,5733 |
| B07 | HLA-B*35:35 | 892  | AALQIPFAM    | 0,7769 |
| B07 | HLA-B*35:35 | 895  | QIPFAMQMAY   | 0,6833 |
| B07 | HLA-B*35:35 | 896  | IPFAMQMAY    | 0,9858 |
| B07 | HLA-B*35:35 | 897  | PFAMQMAY     | 0,5282 |
| B07 | HLA-B*35:35 | 898  | FAMQMAYRF    | 0,8293 |
| B07 | HLA-B*35:35 | 1021 | SANLAATKM    | 0,6342 |
| B07 | HLA-B*35:35 | 1052 | FPQSAPHGV    | 0,6179 |
| B07 | HLA-B*35:35 | 1052 | FPQSAPHGVVF  | 0,8964 |
| B07 | HLA-B*35:35 | 1054 | QSAPHGVVF    | 0,7525 |
| B07 | HLA-B*35:35 | 1056 | APHGVVFLHVTY | 0,6046 |
| B07 | HLA-B*35:35 | 1089 | FPREGVFS     | 0,5258 |
| B07 | HLA-B*35:35 | 1095 | FVSNGTHWF    | 0,7045 |
| B07 | HLA-B*35:35 | 1113 | QIITDNTF     | 0,592  |
| B07 | HLA-B*35:36 | 84   | LPFNDGVYF    | 0,8449 |
| B07 | HLA-B*35:36 | 714  | IPTNFTISV    | 0,6549 |
| B07 | HLA-B*35:36 | 861  | LPPLLTDEM    | 0,674  |
| B07 | HLA-B*35:36 | 1052 | FPQSAPHGVVF  | 0,6557 |
| B07 | HLA-B*35:38 | 1052 | FPQSAPHGVVF  | 0,6186 |
| B07 | HLA-B*35:41 | 24   | LPPAYTNSF    | 0,9203 |
| B07 | HLA-B*35:41 | 30   | NSFTRGVYY    | 0,69   |
| B07 | HLA-B*35:41 | 56   | LPFFSNVTW    | 0,8713 |
| B07 | HLA-B*35:41 | 56   | LPFFSNVTWF   | 0,6188 |
| B07 | HLA-B*35:41 | 81   | NPVLPFNDGVYF | 0,5272 |
| B07 | HLA-B*35:41 | 83   | VLPFNDGVYF   | 0,7855 |
| B07 | HLA-B*35:41 | 84   | LPFNDGVY     | 0,8727 |
| B07 | HLA-B*35:41 | 84   | LPFNDGVYF    | 0,9927 |
| B07 | HLA-B*35:41 | 160  | YSSANNCTF    | 0,5877 |
| B07 | HLA-B*35:41 | 162  | SANNCTFEY    | 0,7881 |
| B07 | HLA-B*35:41 | 192  | FVFKNIDGY    | 0,8905 |
| B07 | HLA-B*35:41 | 196  | NIDGYFKIY    | 0,577  |
| B07 | HLA-B*35:41 | 229  | LPIGINITRF   | 0,8935 |
| B07 | HLA-B*35:41 | 258  | WTAGAAAYY    | 0,7113 |
| B07 | HLA-B*35:41 | 261  | GAAAYYVGY    | 0,5904 |
| B07 | HLA-B*35:41 | 271  | QPRTFLLKY    | 0,731  |
| B07 | HLA-B*35:41 | 321  | QPTESIVRF    | 0,9644 |



|     |             |      |              |        |
|-----|-------------|------|--------------|--------|
| B07 | HLA-B*35:41 | 329  | FPNITNLCPF   | 0,5798 |
| B07 | HLA-B*35:41 | 343  | NATRFASVY    | 0,8709 |
| B07 | HLA-B*35:41 | 361  | CVADYSVLY    | 0,6962 |
| B07 | HLA-B*35:41 | 366  | SVLYNSASF    | 0,6032 |
| B07 | HLA-B*35:41 | 392  | FTNVYADSF    | 0,5373 |
| B07 | HLA-B*35:41 | 462  | KPFERDISTEY  | 0,6461 |
| B07 | HLA-B*35:41 | 478  | TPCNGVEGF    | 0,6721 |
| B07 | HLA-B*35:41 | 481  | NGVEGFNCY    | 0,5089 |
| B07 | HLA-B*35:41 | 490  | FPLQSYGF     | 0,5518 |
| B07 | HLA-B*35:41 | 604  | TSNQVAVLY    | 0,7229 |
| B07 | HLA-B*35:41 | 625  | HADQLTPTW    | 0,7962 |
| B07 | HLA-B*35:41 | 652  | GAEHVNNSY    | 0,6893 |
| B07 | HLA-B*35:41 | 664  | IPIGAGICASY  | 0,908  |
| B07 | HLA-B*35:41 | 686  | SVASQSIIAY   | 0,6499 |
| B07 | HLA-B*35:41 | 687  | VASQSIIAY    | 0,9842 |
| B07 | HLA-B*35:41 | 699  | LGAENSVAY    | 0,9146 |
| B07 | HLA-B*35:41 | 710  | NSIAIPTNF    | 0,6291 |
| B07 | HLA-B*35:41 | 714  | IPTNFTISV    | 0,6147 |
| B07 | HLA-B*35:41 | 861  | LPPLLTDEM    | 0,695  |
| B07 | HLA-B*35:41 | 865  | LTDEMIAQY    | 0,7508 |
| B07 | HLA-B*35:41 | 892  | AALQIPFAM    | 0,7116 |
| B07 | HLA-B*35:41 | 895  | QIPFAMQMAY   | 0,7205 |
| B07 | HLA-B*35:41 | 896  | IPFAMQMAY    | 0,993  |
| B07 | HLA-B*35:41 | 897  | PFAMQMAY     | 0,5108 |
| B07 | HLA-B*35:41 | 898  | FAMQMAYRF    | 0,8561 |
| B07 | HLA-B*35:41 | 1021 | SANLAATKM    | 0,6172 |
| B07 | HLA-B*35:41 | 1052 | FPQSAPHGV    | 0,5784 |
| B07 | HLA-B*35:41 | 1052 | FPQSAPHGVVF  | 0,8981 |
| B07 | HLA-B*35:41 | 1054 | QSAPHGVVF    | 0,7647 |
| B07 | HLA-B*35:41 | 1056 | APHGVVFLHVTY | 0,5536 |
| B07 | HLA-B*35:41 | 1089 | FPREGVFVS    | 0,5633 |
| B07 | HLA-B*35:41 | 1095 | FVSNNGTHWF   | 0,7432 |
| B07 | HLA-B*35:41 | 1113 | QIITDNTF     | 0,6101 |
| B07 | HLA-B*35:41 | 1130 | IGIVNNTVY    | 0,512  |
| B07 | HLA-B*35:42 | 24   | LPPAYTNSF    | 0,8786 |
| B07 | HLA-B*35:42 | 30   | NSFTRGVYY    | 0,5335 |
| B07 | HLA-B*35:42 | 56   | LPFFSNVTW    | 0,8069 |
| B07 | HLA-B*35:42 | 83   | VLPFNDGVYF   | 0,7228 |
| B07 | HLA-B*35:42 | 84   | LPFNDGVY     | 0,824  |
| B07 | HLA-B*35:42 | 84   | LPFNDGVYF    | 0,9877 |
| B07 | HLA-B*35:42 | 162  | SANNCTFEY    | 0,6698 |
| B07 | HLA-B*35:42 | 192  | FVFKNIDGY    | 0,7837 |
| B07 | HLA-B*35:42 | 229  | LPIGINITRF   | 0,8394 |
| B07 | HLA-B*35:42 | 258  | WTAGAAAYY    | 0,5393 |
| B07 | HLA-B*35:42 | 271  | QPRTFLLKY    | 0,6565 |
| B07 | HLA-B*35:42 | 321  | QPTESIVRF    | 0,9476 |
| B07 | HLA-B*35:42 | 343  | NATRFASVY    | 0,7573 |
| B07 | HLA-B*35:42 | 361  | CVADYSVLY    | 0,5167 |
| B07 | HLA-B*35:42 | 478  | TPCNGVEGF    | 0,5961 |
| B07 | HLA-B*35:42 | 604  | TSNQVAVLY    | 0,5492 |

|     |             |      |             |        |
|-----|-------------|------|-------------|--------|
| B07 | HLA-B*35:42 | 625  | HADQLTPTW   | 0,7176 |
| B07 | HLA-B*35:42 | 664  | IPIGAGICASY | 0,8514 |
| B07 | HLA-B*35:42 | 687  | VASQSIIAY   | 0,9634 |
| B07 | HLA-B*35:42 | 699  | LGAENSVAY   | 0,8303 |
| B07 | HLA-B*35:42 | 714  | IPTNFTISV   | 0,5007 |
| B07 | HLA-B*35:42 | 861  | LPPLLTDEM   | 0,6186 |
| B07 | HLA-B*35:42 | 865  | LTDEMIAQY   | 0,6118 |
| B07 | HLA-B*35:42 | 892  | AALQIPFAM   | 0,5789 |
| B07 | HLA-B*35:42 | 895  | QIPFAMQMAY  | 0,6098 |
| B07 | HLA-B*35:42 | 896  | IPFAMQMAY   | 0,9872 |
| B07 | HLA-B*35:42 | 898  | FAMQMAYRF   | 0,7448 |
| B07 | HLA-B*35:42 | 1052 | FPQSAPHGVVF | 0,8504 |
| B07 | HLA-B*35:42 | 1054 | QSAPHGVVF   | 0,6307 |
| B07 | HLA-B*35:42 | 1095 | FVSNNGTHWF  | 0,5997 |
| B07 | HLA-B*35:43 | 24   | LPPAYTNSF   | 0,7875 |
| B07 | HLA-B*35:43 | 30   | NSFTRGVYY   | 0,5895 |
| B07 | HLA-B*35:43 | 84   | LPFNDGVY    | 0,6447 |
| B07 | HLA-B*35:43 | 84   | LPFNDGVYF   | 0,8888 |
| B07 | HLA-B*35:43 | 160  | YSSANNCTF   | 0,5206 |
| B07 | HLA-B*35:43 | 192  | FVFKNIDGY   | 0,7054 |
| B07 | HLA-B*35:43 | 229  | LPIGINITRF  | 0,6427 |
| B07 | HLA-B*35:43 | 258  | WTAGAAAYY   | 0,5829 |
| B07 | HLA-B*35:43 | 343  | NATRFASVY   | 0,7189 |
| B07 | HLA-B*35:43 | 366  | SVLYNSASF   | 0,6027 |
| B07 | HLA-B*35:43 | 664  | IPIGAGICASY | 0,6933 |
| B07 | HLA-B*35:43 | 686  | SVASQSIIAY  | 0,5892 |
| B07 | HLA-B*35:43 | 687  | VASQSIIAY   | 0,8891 |
| B07 | HLA-B*35:43 | 699  | LGAENSVAY   | 0,7466 |
| B07 | HLA-B*35:43 | 896  | IPFAMQMAY   | 0,9166 |
| B07 | HLA-B*35:43 | 898  | FAMQMAYRF   | 0,543  |
| B07 | HLA-B*35:43 | 962  | LVKQLSSNF   | 0,5124 |
| B07 | HLA-B*35:43 | 1052 | FPQSAPHGVVF | 0,6324 |
| B07 | HLA-B*35:43 | 1054 | QSAPHGVVF   | 0,7377 |
| B07 | HLA-B*35:43 | 1095 | FVSNNGTHWF  | 0,6086 |
| B07 | HLA-B*35:43 | 1113 | QIITDNTF    | 0,5611 |
| B07 | HLA-B*35:45 | 84   | LPFNDGVYF   | 0,7419 |
| B07 | HLA-B*35:45 | 687  | VASQSIIAY   | 0,5885 |
| B07 | HLA-B*35:45 | 896  | IPFAMQMAY   | 0,7957 |
| B07 | HLA-B*35:46 | 24   | LPPAYTNSF   | 0,6364 |
| B07 | HLA-B*35:46 | 56   | LPFFSNVTW   | 0,5165 |
| B07 | HLA-B*35:46 | 84   | LPFNDGVYF   | 0,9096 |
| B07 | HLA-B*35:46 | 192  | FVFKNIDGY   | 0,5961 |
| B07 | HLA-B*35:46 | 229  | LPIGINITRF  | 0,5183 |
| B07 | HLA-B*35:46 | 321  | QPTESIVRF   | 0,7199 |
| B07 | HLA-B*35:46 | 343  | NATRFASVY   | 0,5076 |
| B07 | HLA-B*35:46 | 664  | IPIGAGICASY | 0,6105 |
| B07 | HLA-B*35:46 | 687  | VASQSIIAY   | 0,8432 |
| B07 | HLA-B*35:46 | 699  | LGAENSVAY   | 0,6048 |
| B07 | HLA-B*35:46 | 896  | IPFAMQMAY   | 0,9239 |
| B07 | HLA-B*35:46 | 1052 | FPQSAPHGVVF | 0,5441 |

|     |             |      |             |        |
|-----|-------------|------|-------------|--------|
| B07 | HLA-B*35:46 | 1054 | QSAPHGVSF   | 0,5022 |
| B07 | HLA-B*35:54 | 24   | LPPAYTNSF   | 0,8786 |
| B07 | HLA-B*35:54 | 30   | NSFTRGVYY   | 0,5335 |
| B07 | HLA-B*35:54 | 56   | LPFFSNVTW   | 0,8069 |
| B07 | HLA-B*35:54 | 83   | VLPFNDGVYF  | 0,7228 |
| B07 | HLA-B*35:54 | 84   | LPFNDGVY    | 0,824  |
| B07 | HLA-B*35:54 | 84   | LPFNDGVYF   | 0,9877 |
| B07 | HLA-B*35:54 | 162  | SANNTCFEY   | 0,6698 |
| B07 | HLA-B*35:54 | 192  | FVFKNIDGY   | 0,7837 |
| B07 | HLA-B*35:54 | 229  | LPIGINITRF  | 0,8394 |
| B07 | HLA-B*35:54 | 258  | WTAGAAAYY   | 0,5393 |
| B07 | HLA-B*35:54 | 271  | QPRTFLLKY   | 0,6565 |
| B07 | HLA-B*35:54 | 321  | QPTESIVRF   | 0,9476 |
| B07 | HLA-B*35:54 | 343  | NATRFASVY   | 0,7573 |
| B07 | HLA-B*35:54 | 361  | CVADYSVLY   | 0,5167 |
| B07 | HLA-B*35:54 | 478  | TPCNGVEGF   | 0,5961 |
| B07 | HLA-B*35:54 | 604  | TSNQVAVLY   | 0,5492 |
| B07 | HLA-B*35:54 | 625  | HADQLTPTW   | 0,7176 |
| B07 | HLA-B*35:54 | 664  | IPIGAGICASY | 0,8514 |
| B07 | HLA-B*35:54 | 687  | VASQSIAY    | 0,9634 |
| B07 | HLA-B*35:54 | 699  | LGAENSVAY   | 0,8303 |
| B07 | HLA-B*35:54 | 714  | IPTNFTISV   | 0,5007 |
| B07 | HLA-B*35:54 | 861  | LPPLLTDEM   | 0,6186 |
| B07 | HLA-B*35:54 | 865  | LTDEMIAQY   | 0,6118 |
| B07 | HLA-B*35:54 | 892  | AALQIPFAM   | 0,5789 |
| B07 | HLA-B*35:54 | 895  | QIPFAMQMAY  | 0,6098 |
| B07 | HLA-B*35:54 | 896  | IPFAMQMAY   | 0,9872 |
| B07 | HLA-B*35:54 | 898  | FAMQMAYRF   | 0,7448 |
| B07 | HLA-B*35:54 | 1052 | FPQSAPHGVSF | 0,8504 |
| B07 | HLA-B*35:54 | 1054 | QSAPHGVSF   | 0,6307 |
| B07 | HLA-B*35:54 | 1095 | FVSNNGTHWF  | 0,5997 |
| B07 | HLA-B*35:55 | 84   | LPFNDGVYF   | 0,8449 |
| B07 | HLA-B*35:55 | 714  | IPTNFTISV   | 0,6549 |
| B07 | HLA-B*35:55 | 861  | LPPLLTDEM   | 0,674  |
| B07 | HLA-B*35:55 | 1052 | FPQSAPHGVSF | 0,6557 |
| B07 | HLA-B*35:57 | 24   | LPPAYTNSF   | 0,8786 |
| B07 | HLA-B*35:57 | 30   | NSFTRGVYY   | 0,5335 |
| B07 | HLA-B*35:57 | 56   | LPFFSNVTW   | 0,8069 |
| B07 | HLA-B*35:57 | 83   | VLPFNDGVYF  | 0,7228 |
| B07 | HLA-B*35:57 | 84   | LPFNDGVY    | 0,824  |
| B07 | HLA-B*35:57 | 84   | LPFNDGVYF   | 0,9877 |
| B07 | HLA-B*35:57 | 162  | SANNTCFEY   | 0,6698 |
| B07 | HLA-B*35:57 | 192  | FVFKNIDGY   | 0,7837 |
| B07 | HLA-B*35:57 | 229  | LPIGINITRF  | 0,8394 |
| B07 | HLA-B*35:57 | 258  | WTAGAAAYY   | 0,5393 |
| B07 | HLA-B*35:57 | 271  | QPRTFLLKY   | 0,6565 |
| B07 | HLA-B*35:57 | 321  | QPTESIVRF   | 0,9476 |
| B07 | HLA-B*35:57 | 343  | NATRFASVY   | 0,7573 |
| B07 | HLA-B*35:57 | 361  | CVADYSVLY   | 0,5167 |
| B07 | HLA-B*35:57 | 478  | TPCNGVEGF   | 0,5961 |

|     |             |      |             |        |
|-----|-------------|------|-------------|--------|
| B07 | HLA-B*35:57 | 604  | TSNQVAVLY   | 0,5492 |
| B07 | HLA-B*35:57 | 625  | HADQLTPTW   | 0,7176 |
| B07 | HLA-B*35:57 | 664  | IPIGAGICASY | 0,8514 |
| B07 | HLA-B*35:57 | 687  | VASQSIIAY   | 0,9634 |
| B07 | HLA-B*35:57 | 699  | LGAENSVAY   | 0,8303 |
| B07 | HLA-B*35:57 | 714  | IPTNFTISV   | 0,5007 |
| B07 | HLA-B*35:57 | 861  | LPPLLTDEM   | 0,6186 |
| B07 | HLA-B*35:57 | 865  | LTDEMIAQY   | 0,6118 |
| B07 | HLA-B*35:57 | 892  | AALQIPFAM   | 0,5789 |
| B07 | HLA-B*35:57 | 895  | QIPFAMQMAY  | 0,6098 |
| B07 | HLA-B*35:57 | 896  | IPFAMQMAY   | 0,9872 |
| B07 | HLA-B*35:57 | 898  | FAMQMAYRF   | 0,7448 |
| B07 | HLA-B*35:57 | 1052 | FPQSAPHGVVF | 0,8504 |
| B07 | HLA-B*35:57 | 1054 | QSAPHGVVF   | 0,6307 |
| B07 | HLA-B*35:57 | 1095 | FVSNGTHWF   | 0,5997 |
| B07 | HLA-B*35:61 | 24   | LPPAYTNSF   | 0,797  |
| B07 | HLA-B*35:61 | 56   | LPFFSNVTW   | 0,7097 |
| B07 | HLA-B*35:61 | 84   | LPFNDGVY    | 0,6312 |
| B07 | HLA-B*35:61 | 84   | LPFNDGVYF   | 0,9511 |
| B07 | HLA-B*35:61 | 162  | SANNCTFEY   | 0,5112 |
| B07 | HLA-B*35:61 | 229  | LPIGINITRF  | 0,6418 |
| B07 | HLA-B*35:61 | 321  | QPTESIVRF   | 0,8721 |
| B07 | HLA-B*35:61 | 343  | NATRFASVY   | 0,5359 |
| B07 | HLA-B*35:61 | 664  | IPIGAGICASY | 0,6771 |
| B07 | HLA-B*35:61 | 687  | VASQSIIAY   | 0,8861 |
| B07 | HLA-B*35:61 | 699  | LGAENSVAY   | 0,6356 |
| B07 | HLA-B*35:61 | 861  | LPPLLTDEM   | 0,5504 |
| B07 | HLA-B*35:61 | 896  | IPFAMQMAY   | 0,9572 |
| B07 | HLA-B*35:61 | 1052 | FPQSAPHGVVF | 0,787  |
| B07 | HLA-B*39:10 | 24   | LPPAYTNSF   | 0,7059 |
| B07 | HLA-B*39:10 | 38   | YDPKVFRRSSV | 0,6561 |
| B07 | HLA-B*39:10 | 38   | YDPKVFRRSVL | 0,6644 |
| B07 | HLA-B*39:10 | 84   | LPFNDGVYF   | 0,7911 |
| B07 | HLA-B*39:10 | 208  | TPINLVRDL   | 0,8013 |
| B07 | HLA-B*39:10 | 216  | LPQGFSAL    | 0,7184 |
| B07 | HLA-B*39:10 | 229  | LPIGINITRF  | 0,5061 |
| B07 | HLA-B*39:10 | 506  | QPYRVVVL    | 0,6651 |
| B07 | HLA-B*39:10 | 714  | IPTNFTISV   | 0,8392 |
| B07 | HLA-B*39:10 | 861  | LPPLLTDEM   | 0,6235 |
| B07 | HLA-B*39:10 | 869  | MIAQYTSAL   | 0,6143 |
| B07 | HLA-B*39:10 | 1052 | FPQSAPHGV   | 0,8631 |
| B07 | HLA-B*39:10 | 1052 | FPQSAPHGVV  | 0,603  |
| B07 | HLA-B*39:10 | 1052 | FPQSAPHGVVF | 0,7108 |
| B07 | HLA-B*39:10 | 1262 | EPVLKGVKL   | 0,8325 |
| B07 | HLA-B*39:16 | 24   | LPPAYTNSF   | 0,7059 |
| B07 | HLA-B*39:16 | 38   | YDPKVFRRSSV | 0,6561 |
| B07 | HLA-B*39:16 | 38   | YDPKVFRRSVL | 0,6644 |
| B07 | HLA-B*39:16 | 84   | LPFNDGVYF   | 0,7911 |
| B07 | HLA-B*39:16 | 208  | TPINLVRDL   | 0,8013 |
| B07 | HLA-B*39:16 | 216  | LPQGFSAL    | 0,7184 |

|     |             |      |             |        |
|-----|-------------|------|-------------|--------|
| B07 | HLA-B*39:16 | 229  | LPIGINITRF  | 0,5061 |
| B07 | HLA-B*39:16 | 506  | QPYRVVVL    | 0,6651 |
| B07 | HLA-B*39:16 | 714  | IPTNFTISV   | 0,8392 |
| B07 | HLA-B*39:16 | 861  | LPPLLTDEM   | 0,6235 |
| B07 | HLA-B*39:16 | 869  | MIAQYTSAL   | 0,6143 |
| B07 | HLA-B*39:16 | 1052 | FPQSAPHGV   | 0,8631 |
| B07 | HLA-B*39:16 | 1052 | FPQSAPHGVV  | 0,603  |
| B07 | HLA-B*39:16 | 1052 | FPQSAPHGVVF | 0,7108 |
| B07 | HLA-B*39:16 | 1262 | EPVLKGVKL   | 0,8325 |
| B07 | HLA-B*42:01 | 24   | LPPAYTNSF   | 0,7878 |
| B07 | HLA-B*42:01 | 38   | YDPKVFRRSSV | 0,6536 |
| B07 | HLA-B*42:01 | 84   | LPFNDGVYF   | 0,7423 |
| B07 | HLA-B*42:01 | 208  | TPINLVRDL   | 0,869  |
| B07 | HLA-B*42:01 | 216  | LPQGFSAL    | 0,7808 |
| B07 | HLA-B*42:01 | 229  | LPIGINITRF  | 0,5486 |
| B07 | HLA-B*42:01 | 506  | QPYRVVVL    | 0,8243 |
| B07 | HLA-B*42:01 | 526  | GPKKSTNLV   | 0,6419 |
| B07 | HLA-B*42:01 | 620  | VPVAIHADQL  | 0,633  |
| B07 | HLA-B*42:01 | 714  | IPTNFTISV   | 0,8435 |
| B07 | HLA-B*42:01 | 869  | MIAQYTSAL   | 0,5968 |
| B07 | HLA-B*42:01 | 1052 | FPQSAPHGV   | 0,7467 |
| B07 | HLA-B*42:01 | 1052 | FPQSAPHGVVF | 0,6491 |
| B07 | HLA-B*42:01 | 1056 | APHGVVFL    | 0,7492 |
| B07 | HLA-B*42:01 | 1261 | SEPVKGVKL   | 0,7228 |
| B07 | HLA-B*42:01 | 1262 | EPVLKGVKL   | 0,831  |
| B07 | HLA-B*42:04 | 38   | YDPKVFRRSSV | 0,7244 |
| B07 | HLA-B*42:04 | 208  | TPINLVRDL   | 0,7004 |
| B07 | HLA-B*42:04 | 216  | LPQGFSAL    | 0,6226 |
| B07 | HLA-B*42:04 | 462  | KPFERDIST   | 0,5873 |
| B07 | HLA-B*42:04 | 506  | QPYRVVVL    | 0,6967 |
| B07 | HLA-B*42:04 | 526  | GPKKSTNLV   | 0,662  |
| B07 | HLA-B*42:04 | 588  | TPCSFGGVS   | 0,5412 |
| B07 | HLA-B*42:04 | 664  | IPIGAGICA   | 0,5648 |
| B07 | HLA-B*42:04 | 680  | SPRRARVA    | 0,6117 |
| B07 | HLA-B*42:04 | 714  | IPTNFTISV   | 0,8825 |
| B07 | HLA-B*42:04 | 1052 | FPQSAPHGV   | 0,8239 |
| B07 | HLA-B*42:04 | 1052 | FPQSAPHGVV  | 0,6478 |
| B07 | HLA-B*42:04 | 1089 | FPREGVVFV   | 0,655  |
| B07 | HLA-B*42:04 | 1089 | FPREGVVS    | 0,5819 |
| B07 | HLA-B*42:05 | 24   | LPPAYTNSF   | 0,7878 |
| B07 | HLA-B*42:05 | 38   | YDPKVFRRSSV | 0,6536 |
| B07 | HLA-B*42:05 | 84   | LPFNDGVYF   | 0,7423 |
| B07 | HLA-B*42:05 | 208  | TPINLVRDL   | 0,869  |
| B07 | HLA-B*42:05 | 216  | LPQGFSAL    | 0,7808 |
| B07 | HLA-B*42:05 | 229  | LPIGINITRF  | 0,5486 |
| B07 | HLA-B*42:05 | 506  | QPYRVVVL    | 0,8243 |
| B07 | HLA-B*42:05 | 526  | GPKKSTNLV   | 0,6419 |
| B07 | HLA-B*42:05 | 620  | VPVAIHADQL  | 0,633  |
| B07 | HLA-B*42:05 | 714  | IPTNFTISV   | 0,8435 |
| B07 | HLA-B*42:05 | 869  | MIAQYTSAL   | 0,5968 |

|     |             |      |             |        |
|-----|-------------|------|-------------|--------|
| B07 | HLA-B*42:05 | 1052 | FPQSAPHGV   | 0,7467 |
| B07 | HLA-B*42:05 | 1052 | FPQSAPHGVVF | 0,6491 |
| B07 | HLA-B*42:05 | 1056 | APHGVVFL    | 0,7492 |
| B07 | HLA-B*42:05 | 1261 | SEPVLKGVKL  | 0,7228 |
| B07 | HLA-B*42:05 | 1262 | EPVLKGVKL   | 0,831  |
| B07 | HLA-B*51:01 | 712  | IAIPTNFTI   | 0,8936 |
| B07 | HLA-B*51:01 | 714  | IPTNFTISV   | 0,9219 |
| B07 | HLA-B*51:02 | 712  | IAIPTNFTI   | 0,9071 |
| B07 | HLA-B*51:02 | 714  | IPTNFTISV   | 0,9166 |
| B07 | HLA-B*51:02 | 923  | IANQFNSAI   | 0,7018 |
| B07 | HLA-B*51:02 | 1052 | FPQSAPHGV   | 0,7998 |
| B07 | HLA-B*51:02 | 1052 | FPQSAPHGVV  | 0,6058 |
| B07 | HLA-B*51:05 | 425  | LPDDFTGCVI  | 0,5315 |
| B07 | HLA-B*51:09 | 712  | IAIPTNFTI   | 0,7984 |
| B07 | HLA-B*51:09 | 714  | IPTNFTISV   | 0,7885 |
| B07 | HLA-B*51:16 | 712  | IAIPTNFTI   | 0,8496 |
| B07 | HLA-B*51:16 | 714  | IPTNFTISV   | 0,882  |
| B07 | HLA-B*51:17 | 712  | IAIPTNFTI   | 0,8936 |
| B07 | HLA-B*51:17 | 714  | IPTNFTISV   | 0,9219 |
| B07 | HLA-B*51:18 | 712  | IAIPTNFTI   | 0,8936 |
| B07 | HLA-B*51:18 | 714  | IPTNFTISV   | 0,9219 |
| B07 | HLA-B*51:19 | 56   | LPFFSNVTW   | 0,5994 |
| B07 | HLA-B*51:19 | 84   | LPFNDGVYF   | 0,7163 |
| B07 | HLA-B*51:19 | 712  | IAIPTNFTI   | 0,8629 |
| B07 | HLA-B*51:19 | 714  | IPTNFTISV   | 0,8404 |
| B07 | HLA-B*51:21 | 712  | IAIPTNFTI   | 0,8586 |
| B07 | HLA-B*51:21 | 714  | IPTNFTISV   | 0,8761 |
| B07 | HLA-B*51:24 | 712  | IAIPTNFTI   | 0,8936 |
| B07 | HLA-B*51:24 | 714  | IPTNFTISV   | 0,9219 |
| B07 | HLA-B*51:26 | 712  | IAIPTNFTI   | 0,8936 |
| B07 | HLA-B*51:26 | 714  | IPTNFTISV   | 0,9219 |
| B07 | HLA-B*51:28 | 712  | IAIPTNFTI   | 0,8936 |
| B07 | HLA-B*51:28 | 714  | IPTNFTISV   | 0,9219 |
| B07 | HLA-B*51:29 | 425  | LPDDFTGCVI  | 0,6074 |
| B07 | HLA-B*51:29 | 714  | IPTNFTISV   | 0,8847 |
| B07 | HLA-B*51:30 | 712  | IAIPTNFTI   | 0,8936 |
| B07 | HLA-B*51:30 | 714  | IPTNFTISV   | 0,9219 |
| B07 | HLA-B*51:31 | 712  | IAIPTNFTI   | 0,8324 |
| B07 | HLA-B*51:31 | 714  | IPTNFTISV   | 0,8262 |
| B07 | HLA-B*51:32 | 712  | IAIPTNFTI   | 0,8936 |
| B07 | HLA-B*51:32 | 714  | IPTNFTISV   | 0,9219 |
| B07 | HLA-B*51:33 | 712  | IAIPTNFTI   | 0,8936 |
| B07 | HLA-B*51:33 | 714  | IPTNFTISV   | 0,9219 |
| B07 | HLA-B*51:34 | 712  | IAIPTNFTI   | 0,8619 |
| B07 | HLA-B*51:34 | 714  | IPTNFTISV   | 0,8627 |
| B07 | HLA-B*51:34 | 1052 | FPQSAPHGVV  | 0,5175 |
| B07 | HLA-B*51:35 | 712  | IAIPTNFTI   | 0,8936 |
| B07 | HLA-B*51:35 | 714  | IPTNFTISV   | 0,9219 |
| B07 | HLA-B*51:36 | 714  | IPTNFTISV   | 0,8244 |
| B07 | HLA-B*51:36 | 1052 | FPQSAPHGVV  | 0,5349 |

|     |             |      |              |        |
|-----|-------------|------|--------------|--------|
| B07 | HLA-B*51:38 | 712  | IAIPTNFTI    | 0,8936 |
| B07 | HLA-B*51:38 | 714  | IPTNFTISV    | 0,9219 |
| B07 | HLA-B*53:01 | 24   | LPPAYTNSF    | 0,7097 |
| B07 | HLA-B*53:01 | 55   | FLPFFSNVTW   | 0,7688 |
| B07 | HLA-B*53:01 | 56   | LPFFSNVTW    | 0,9556 |
| B07 | HLA-B*53:01 | 56   | LPFFSNVTWF   | 0,502  |
| B07 | HLA-B*53:01 | 83   | VLPFNDGVYF   | 0,7116 |
| B07 | HLA-B*53:01 | 84   | LPFNDGVYF    | 0,967  |
| B07 | HLA-B*53:01 | 229  | LPIGINITRF   | 0,8328 |
| B07 | HLA-B*53:01 | 250  | TPGDSSSGW    | 0,8069 |
| B07 | HLA-B*53:01 | 320  | VQPTESIVRF   | 0,5847 |
| B07 | HLA-B*53:01 | 321  | QPTESIVRF    | 0,9157 |
| B07 | HLA-B*53:01 | 625  | HADQLTPTW    | 0,9493 |
| B07 | HLA-B*53:01 | 714  | IPTNFTISV    | 0,5509 |
| B07 | HLA-B*53:01 | 878  | LAGTITSGW    | 0,6015 |
| B07 | HLA-B*53:01 | 896  | IPFAMQMAY    | 0,8495 |
| B07 | HLA-B*53:01 | 898  | FAMQMAYRF    | 0,7049 |
| B07 | HLA-B*53:01 | 1052 | FPQSAPHGV    | 0,6048 |
| B07 | HLA-B*53:01 | 1052 | FPQSAPHGVVF  | 0,6896 |
| B07 | HLA-B*53:02 | 24   | LPPAYTNSF    | 0,6754 |
| B07 | HLA-B*53:02 | 53   | DLFLPFFSNVTW | 0,5156 |
| B07 | HLA-B*53:02 | 55   | FLPFFSNVTW   | 0,7377 |
| B07 | HLA-B*53:02 | 56   | LPFFSNVTW    | 0,9419 |
| B07 | HLA-B*53:02 | 83   | VLPFNDGVYF   | 0,5685 |
| B07 | HLA-B*53:02 | 84   | LPFNDGVYF    | 0,927  |
| B07 | HLA-B*53:02 | 229  | LPIGINITRF   | 0,7712 |
| B07 | HLA-B*53:02 | 321  | QPTESIVRF    | 0,8542 |
| B07 | HLA-B*53:02 | 625  | HADQLTPTW    | 0,8778 |
| B07 | HLA-B*53:02 | 714  | IPTNFTISV    | 0,5046 |
| B07 | HLA-B*53:02 | 896  | IPFAMQMAY    | 0,8286 |
| B07 | HLA-B*53:02 | 898  | FAMQMAYRF    | 0,7523 |
| B07 | HLA-B*53:02 | 1052 | FPQSAPHGVVF  | 0,6331 |
| B07 | HLA-B*53:06 | 24   | LPPAYTNSF    | 0,7435 |
| B07 | HLA-B*53:06 | 55   | FLPFFSNVTW   | 0,611  |
| B07 | HLA-B*53:06 | 56   | LPFFSNVTW    | 0,897  |
| B07 | HLA-B*53:06 | 84   | LPFNDGVYF    | 0,9269 |
| B07 | HLA-B*53:06 | 229  | LPIGINITRF   | 0,7787 |
| B07 | HLA-B*53:06 | 321  | QPTESIVRF    | 0,8336 |
| B07 | HLA-B*53:06 | 490  | FPLQSYGF     | 0,5333 |
| B07 | HLA-B*53:06 | 625  | HADQLTPTW    | 0,7925 |
| B07 | HLA-B*53:06 | 896  | IPFAMQMAY    | 0,8651 |
| B07 | HLA-B*53:06 | 898  | FAMQMAYRF    | 0,7249 |
| B07 | HLA-B*53:06 | 1052 | FPQSAPHGVVF  | 0,6456 |
| B07 | HLA-B*53:06 | 1095 | FVSNGTHWF    | 0,5268 |
| B07 | HLA-B*53:08 | 24   | LPPAYTNSF    | 0,7478 |
| B07 | HLA-B*53:08 | 55   | FLPFFSNVTW   | 0,634  |
| B07 | HLA-B*53:08 | 56   | LPFFSNVTW    | 0,9209 |
| B07 | HLA-B*53:08 | 83   | VLPFNDGVYF   | 0,713  |
| B07 | HLA-B*53:08 | 84   | LPFNDGVYF    | 0,9579 |
| B07 | HLA-B*53:08 | 229  | LPIGINITRF   | 0,8211 |

|     |             |      |             |        |
|-----|-------------|------|-------------|--------|
| B07 | HLA-B*53:08 | 250  | TPGDSSSGW   | 0,701  |
| B07 | HLA-B*53:08 | 321  | QPTESIVRF   | 0,8829 |
| B07 | HLA-B*53:08 | 625  | HADQLTPTW   | 0,8712 |
| B07 | HLA-B*53:08 | 687  | VASQSIIAY   | 0,7141 |
| B07 | HLA-B*53:08 | 712  | IAIPTNFTI   | 0,5344 |
| B07 | HLA-B*53:08 | 714  | IPTNFTISV   | 0,5417 |
| B07 | HLA-B*53:08 | 878  | LAGTITSGW   | 0,576  |
| B07 | HLA-B*53:08 | 896  | IPFAMQMAY   | 0,8758 |
| B07 | HLA-B*53:08 | 898  | FAMQMAYRF   | 0,6831 |
| B07 | HLA-B*53:08 | 1052 | FPQSAPHGVVF | 0,6472 |
| B07 | HLA-B*53:08 | 1095 | FVSNNGTHWF  | 0,6097 |
| B07 | HLA-B*53:10 | 24   | LPPAYTNSF   | 0,7097 |
| B07 | HLA-B*53:10 | 55   | FLPFFSNVTW  | 0,7688 |
| B07 | HLA-B*53:10 | 56   | LPPFFSNVTW  | 0,9556 |
| B07 | HLA-B*53:10 | 56   | LPPFFSNVTWF | 0,502  |
| B07 | HLA-B*53:10 | 83   | VLPFNDGVYF  | 0,7116 |
| B07 | HLA-B*53:10 | 84   | LPFNDGVYF   | 0,967  |
| B07 | HLA-B*53:10 | 229  | LPIGINITRF  | 0,8328 |
| B07 | HLA-B*53:10 | 250  | TPGDSSSGW   | 0,8069 |
| B07 | HLA-B*53:10 | 320  | VQPTESIVRF  | 0,5847 |
| B07 | HLA-B*53:10 | 321  | QPTESIVRF   | 0,9157 |
| B07 | HLA-B*53:10 | 625  | HADQLTPTW   | 0,9493 |
| B07 | HLA-B*53:10 | 714  | IPTNFTISV   | 0,5509 |
| B07 | HLA-B*53:10 | 878  | LAGTITSGW   | 0,6015 |
| B07 | HLA-B*53:10 | 896  | IPFAMQMAY   | 0,8495 |
| B07 | HLA-B*53:10 | 898  | FAMQMAYRF   | 0,7049 |
| B07 | HLA-B*53:10 | 1052 | FPQSAPHGV   | 0,6048 |
| B07 | HLA-B*53:10 | 1052 | FPQSAPHGVVF | 0,6896 |
| B07 | HLA-B*54:01 | 38   | YDPKVFRSS   | 0,5631 |
| B07 | HLA-B*54:01 | 38   | YDPKVFRSSV  | 0,551  |
| B07 | HLA-B*54:01 | 84   | LPFNDGVYFA  | 0,8147 |
| B07 | HLA-B*54:01 | 336  | CPFGEVFNA   | 0,675  |
| B07 | HLA-B*54:01 | 506  | QPYRVVLS    | 0,517  |
| B07 | HLA-B*54:01 | 664  | IPIGAGICA   | 0,7761 |
| B07 | HLA-B*54:01 | 714  | IPTNFTISV   | 0,8556 |
| B07 | HLA-B*54:01 | 1052 | FPQSAPHGV   | 0,7788 |
| B07 | HLA-B*54:01 | 1052 | FPQSAPHGVV  | 0,5637 |
| B07 | HLA-B*54:01 | 1089 | FPREGVFV    | 0,581  |
| B07 | HLA-B*54:01 | 1089 | FPREGVFVS   | 0,826  |
| B07 | HLA-B*54:03 | 38   | YDPKVFRSS   | 0,5065 |
| B07 | HLA-B*54:03 | 84   | LPFNDGVYFA  | 0,7103 |
| B07 | HLA-B*54:03 | 336  | CPFGEVFNA   | 0,5864 |
| B07 | HLA-B*54:03 | 664  | IPIGAGICA   | 0,6982 |
| B07 | HLA-B*54:03 | 714  | IPTNFTISV   | 0,759  |
| B07 | HLA-B*54:03 | 1052 | FPQSAPHGV   | 0,7099 |
| B07 | HLA-B*54:03 | 1089 | FPREGVFVS   | 0,7861 |
| B07 | HLA-B*54:04 | 38   | YDPKVFRSSV  | 0,6067 |
| B07 | HLA-B*54:04 | 84   | LPFNDGVYF   | 0,6325 |
| B07 | HLA-B*54:04 | 84   | LPFNDGVYFA  | 0,7208 |
| B07 | HLA-B*54:04 | 336  | CPFGEVFNA   | 0,5184 |



|     |             |      |            |        |
|-----|-------------|------|------------|--------|
| B07 | HLA-B*54:04 | 664  | IPIGAGICA  | 0,7162 |
| B07 | HLA-B*54:04 | 714  | IPTNFTISV  | 0,8759 |
| B07 | HLA-B*54:04 | 1052 | FPQSAPHGV  | 0,8116 |
| B07 | HLA-B*54:04 | 1052 | FPQSAPHGVV | 0,6221 |
| B07 | HLA-B*54:04 | 1089 | FPREGVFN   | 0,626  |
| B07 | HLA-B*54:04 | 1089 | FPREGVFN   | 0,7032 |
| B07 | HLA-B*54:06 | 24   | LPPAYTNSF  | 0,5438 |
| B07 | HLA-B*54:06 | 84   | LPFNDGVYF  | 0,7179 |
| B07 | HLA-B*54:06 | 271  | QPRTFLLKY  | 0,5428 |
| B07 | HLA-B*54:06 | 687  | VASQSIAY   | 0,5887 |
| B07 | HLA-B*54:06 | 896  | IPFAMQMAY  | 0,8139 |
| B07 | HLA-B*54:07 | 38   | YDPKVFSS   | 0,5631 |
| B07 | HLA-B*54:07 | 38   | YDPKVFSSV  | 0,551  |
| B07 | HLA-B*54:07 | 84   | LPFNDGVYFA | 0,8147 |
| B07 | HLA-B*54:07 | 336  | CPFGEVFNA  | 0,675  |
| B07 | HLA-B*54:07 | 506  | QPYRVVLS   | 0,517  |
| B07 | HLA-B*54:07 | 664  | IPIGAGICA  | 0,7761 |
| B07 | HLA-B*54:07 | 714  | IPTNFTISV  | 0,8556 |
| B07 | HLA-B*54:07 | 1052 | FPQSAPHGV  | 0,7788 |
| B07 | HLA-B*54:07 | 1052 | FPQSAPHGVV | 0,5637 |
| B07 | HLA-B*54:07 | 1089 | FPREGVFN   | 0,581  |
| B07 | HLA-B*54:07 | 1089 | FPREGVFN   | 0,826  |
| B07 | HLA-B*55:01 | 664  | IPIGAGICA  | 0,566  |
| B07 | HLA-B*55:01 | 680  | SPRRARVA   | 0,6445 |
| B07 | HLA-B*55:01 | 714  | IPTNFTISV  | 0,699  |
| B07 | HLA-B*55:01 | 1052 | FPQSAPHGV  | 0,551  |
| B07 | HLA-B*55:01 | 1089 | FPREGVFN   | 0,6525 |
| B07 | HLA-B*55:02 | 38   | YDPKVFSS   | 0,6589 |
| B07 | HLA-B*55:02 | 38   | YDPKVFSSV  | 0,5249 |
| B07 | HLA-B*55:02 | 84   | LPFNDGVYF  | 0,6389 |
| B07 | HLA-B*55:02 | 84   | LPFNDGVYFA | 0,6565 |
| B07 | HLA-B*55:02 | 336  | CPFGEVFNA  | 0,5229 |
| B07 | HLA-B*55:02 | 462  | KPFERDIST  | 0,6378 |
| B07 | HLA-B*55:02 | 506  | QPYRVVLS   | 0,527  |
| B07 | HLA-B*55:02 | 664  | IPIGAGICA  | 0,7531 |
| B07 | HLA-B*55:02 | 714  | IPTNFTISV  | 0,8516 |
| B07 | HLA-B*55:02 | 896  | IPFAMQMAY  | 0,5572 |
| B07 | HLA-B*55:02 | 1052 | FPQSAPHGV  | 0,758  |
| B07 | HLA-B*55:02 | 1052 | FPQSAPHGVV | 0,5174 |
| B07 | HLA-B*55:02 | 1089 | FPREGVFN   | 0,5413 |
| B07 | HLA-B*55:02 | 1089 | FPREGVFN   | 0,8144 |
| B07 | HLA-B*55:03 | 714  | IPTNFTISV  | 0,6188 |
| B07 | HLA-B*55:03 | 1052 | FPQSAPHGV  | 0,5151 |
| B07 | HLA-B*55:03 | 1089 | FPREGVFN   | 0,531  |
| B07 | HLA-B*55:04 | 24   | LPPAYTNSF  | 0,7178 |
| B07 | HLA-B*55:04 | 38   | YDPKVFSSV  | 0,6017 |
| B07 | HLA-B*55:04 | 56   | LPFFSNVTW  | 0,5466 |
| B07 | HLA-B*55:04 | 83   | VLPFNDGVYF | 0,5131 |
| B07 | HLA-B*55:04 | 84   | LPFNDGVYF  | 0,8753 |
| B07 | HLA-B*55:04 | 208  | TPINLVRDL  | 0,8684 |

|     |             |      |             |        |
|-----|-------------|------|-------------|--------|
| B07 | HLA-B*55:04 | 216  | LPQGFSAL    | 0,6991 |
| B07 | HLA-B*55:04 | 229  | LPIGINITRF  | 0,7322 |
| B07 | HLA-B*55:04 | 321  | QPTESIVRF   | 0,7159 |
| B07 | HLA-B*55:04 | 462  | KPFERDIST   | 0,5424 |
| B07 | HLA-B*55:04 | 506  | QPYRVVVL    | 0,7157 |
| B07 | HLA-B*55:04 | 620  | VPVAIHADQL  | 0,6147 |
| B07 | HLA-B*55:04 | 714  | IPTNFTISV   | 0,896  |
| B07 | HLA-B*55:04 | 869  | MIAQYTSAL   | 0,5791 |
| B07 | HLA-B*55:04 | 892  | AALQIPFAM   | 0,5124 |
| B07 | HLA-B*55:04 | 896  | IPFAMQMAY   | 0,6175 |
| B07 | HLA-B*55:04 | 1052 | FPQSAPHGV   | 0,8055 |
| B07 | HLA-B*55:04 | 1052 | FPQSAPHGVVF | 0,6991 |
| B07 | HLA-B*55:04 | 1056 | APHGVVFL    | 0,6967 |
| B07 | HLA-B*55:04 | 1089 | FPREGVFS    | 0,5475 |
| B07 | HLA-B*55:04 | 1261 | SEPVLKGVKL  | 0,5737 |
| B07 | HLA-B*55:04 | 1262 | EPVLKGVKL   | 0,7445 |
| B07 | HLA-B*55:05 | 664  | IPIGAGICA   | 0,566  |
| B07 | HLA-B*55:05 | 680  | SPRRARVA    | 0,6445 |
| B07 | HLA-B*55:05 | 714  | IPTNFTISV   | 0,699  |
| B07 | HLA-B*55:05 | 1052 | FPQSAPHGV   | 0,551  |
| B07 | HLA-B*55:05 | 1089 | FPREGVFS    | 0,6525 |
| B07 | HLA-B*55:07 | 38   | YDPKVRSS    | 0,5631 |
| B07 | HLA-B*55:07 | 38   | YDPKVRSSV   | 0,551  |
| B07 | HLA-B*55:07 | 84   | LPFNDGVYFA  | 0,8147 |
| B07 | HLA-B*55:07 | 336  | CPFGEVFNA   | 0,675  |
| B07 | HLA-B*55:07 | 506  | QPYRVVLS    | 0,517  |
| B07 | HLA-B*55:07 | 664  | IPIGAGICA   | 0,7761 |
| B07 | HLA-B*55:07 | 714  | IPTNFTISV   | 0,8556 |
| B07 | HLA-B*55:07 | 1052 | FPQSAPHGV   | 0,7788 |
| B07 | HLA-B*55:07 | 1052 | FPQSAPHGVV  | 0,5637 |
| B07 | HLA-B*55:07 | 1089 | FPREGVFS    | 0,581  |
| B07 | HLA-B*55:07 | 1089 | FPREGVFS    | 0,826  |
| B07 | HLA-B*55:09 | 38   | YDPKVRSSV   | 0,6045 |
| B07 | HLA-B*55:09 | 664  | IPIGAGICA   | 0,5924 |
| B07 | HLA-B*55:09 | 680  | SPRRARVA    | 0,7242 |
| B07 | HLA-B*55:09 | 714  | IPTNFTISV   | 0,7624 |
| B07 | HLA-B*55:09 | 1052 | FPQSAPHGV   | 0,5713 |
| B07 | HLA-B*55:09 | 1089 | FPREGVFS    | 0,6196 |
| B07 | HLA-B*55:10 | 38   | YDPKVRSS    | 0,6429 |
| B07 | HLA-B*55:10 | 84   | LPFNDGVYF   | 0,6586 |
| B07 | HLA-B*55:10 | 84   | LPFNDGVYFA  | 0,567  |
| B07 | HLA-B*55:10 | 462  | KPFERDIST   | 0,64   |
| B07 | HLA-B*55:10 | 664  | IPIGAGICA   | 0,7168 |
| B07 | HLA-B*55:10 | 714  | IPTNFTISV   | 0,8293 |
| B07 | HLA-B*55:10 | 896  | IPFAMQMAY   | 0,5528 |
| B07 | HLA-B*55:10 | 1052 | FPQSAPHGV   | 0,723  |
| B07 | HLA-B*55:10 | 1089 | FPREGVFS    | 0,5148 |
| B07 | HLA-B*55:10 | 1089 | FPREGVFS    | 0,776  |
| B07 | HLA-B*55:15 | 664  | IPIGAGICA   | 0,566  |
| B07 | HLA-B*55:15 | 680  | SPRRARVA    | 0,6445 |

|     |             |      |            |        |
|-----|-------------|------|------------|--------|
| B07 | HLA-B*55:15 | 714  | IPTNFTISV  | 0,699  |
| B07 | HLA-B*55:15 | 1052 | FPQSAPHGV  | 0,551  |
| B07 | HLA-B*55:15 | 1089 | FPREGVFVS  | 0,6525 |
| B07 | HLA-B*55:17 | 462  | KPFERDIST  | 0,5535 |
| B07 | HLA-B*55:17 | 664  | IPIGAGICA  | 0,5355 |
| B07 | HLA-B*55:17 | 680  | SPRRARVA   | 0,6844 |
| B07 | HLA-B*55:17 | 714  | IPTNFTISV  | 0,7936 |
| B07 | HLA-B*55:17 | 1052 | FPQSAPHGV  | 0,6104 |
| B07 | HLA-B*55:17 | 1089 | FPREGVFVS  | 0,5754 |
| B07 | HLA-B*55:19 | 38   | YDPKVFSS   | 0,6589 |
| B07 | HLA-B*55:19 | 38   | YDPKVFSSV  | 0,5249 |
| B07 | HLA-B*55:19 | 84   | LPFNDGVYF  | 0,6389 |
| B07 | HLA-B*55:19 | 84   | LPFNDGVYFA | 0,6565 |
| B07 | HLA-B*55:19 | 336  | CPFGEVFA   | 0,5229 |
| B07 | HLA-B*55:19 | 462  | KPFERDIST  | 0,6378 |
| B07 | HLA-B*55:19 | 506  | QPYRVVLS   | 0,527  |
| B07 | HLA-B*55:19 | 664  | IPIGAGICA  | 0,7531 |
| B07 | HLA-B*55:19 | 714  | IPTNFTISV  | 0,8516 |
| B07 | HLA-B*55:19 | 896  | IPFAMQMAY  | 0,5572 |
| B07 | HLA-B*55:19 | 1052 | FPQSAPHGV  | 0,758  |
| B07 | HLA-B*55:19 | 1052 | FPQSAPHGVV | 0,5174 |
| B07 | HLA-B*55:19 | 1089 | FPREGVFV   | 0,5413 |
| B07 | HLA-B*55:19 | 1089 | FPREGVFVS  | 0,8144 |
| B07 | HLA-B*56:01 | 38   | YDPKVFSS   | 0,5594 |
| B07 | HLA-B*56:01 | 84   | LPFNDGVYF  | 0,6481 |
| B07 | HLA-B*56:01 | 84   | LPFNDGVYFA | 0,5533 |
| B07 | HLA-B*56:01 | 664  | IPIGAGICA  | 0,6738 |
| B07 | HLA-B*56:01 | 714  | IPTNFTISV  | 0,7754 |
| B07 | HLA-B*56:01 | 896  | IPFAMQMAY  | 0,5446 |
| B07 | HLA-B*56:01 | 1052 | FPQSAPHGV  | 0,6791 |
| B07 | HLA-B*56:01 | 1089 | FPREGVFVS  | 0,7781 |
| B07 | HLA-B*56:03 | 84   | LPFNDGVYF  | 0,65   |
| B07 | HLA-B*56:03 | 271  | QPRTFLLKY  | 0,5652 |
| B07 | HLA-B*56:03 | 687  | VASQSIAY   | 0,5692 |
| B07 | HLA-B*56:03 | 896  | IPFAMQMAY  | 0,7714 |
| B07 | HLA-B*56:05 | 664  | IPIGAGICA  | 0,503  |
| B07 | HLA-B*56:05 | 680  | SPRRARVA   | 0,5529 |
| B07 | HLA-B*56:05 | 714  | IPTNFTISV  | 0,7632 |
| B07 | HLA-B*56:05 | 896  | IPFAMQMAY  | 0,5665 |
| B07 | HLA-B*56:05 | 1052 | FPQSAPHGV  | 0,6122 |
| B07 | HLA-B*56:05 | 1089 | FPREGVFV   | 0,5865 |
| B07 | HLA-B*56:05 | 1089 | FPREGVFVS  | 0,6335 |
| B07 | HLA-B*56:13 | 38   | YDPKVFSS   | 0,5603 |
| B07 | HLA-B*56:13 | 38   | YDPKVFSSV  | 0,5158 |
| B07 | HLA-B*56:13 | 664  | IPIGAGICA  | 0,6238 |
| B07 | HLA-B*56:13 | 680  | SPRRARVA   | 0,513  |
| B07 | HLA-B*56:13 | 714  | IPTNFTISV  | 0,769  |
| B07 | HLA-B*56:13 | 1052 | FPQSAPHGV  | 0,731  |
| B07 | HLA-B*56:13 | 1052 | FPQSAPHGVV | 0,5165 |
| B07 | HLA-B*56:13 | 1089 | FPREGVFV   | 0,5099 |

|     |             |      |             |        |
|-----|-------------|------|-------------|--------|
| B07 | HLA-B*56:13 | 1089 | FPREGVFVS   | 0,715  |
| B07 | HLA-B*56:15 | 84   | LPFNDGVYF   | 0,7262 |
| B07 | HLA-B*56:15 | 664  | IPIGAGICA   | 0,6282 |
| B07 | HLA-B*56:15 | 714  | IPTNFTISV   | 0,8617 |
| B07 | HLA-B*56:15 | 1052 | FPQSAPHGV   | 0,7753 |
| B07 | HLA-B*56:15 | 1052 | FPQSAPHGVV  | 0,5072 |
| B07 | HLA-B*56:15 | 1089 | FPREGVFVS   | 0,685  |
| B07 | HLA-B*56:16 | 38   | YDPKVFRSS   | 0,5423 |
| B07 | HLA-B*56:16 | 84   | LPFNDGVYF   | 0,6574 |
| B07 | HLA-B*56:16 | 664  | IPIGAGICA   | 0,6319 |
| B07 | HLA-B*56:16 | 714  | IPTNFTISV   | 0,7528 |
| B07 | HLA-B*56:16 | 896  | IPFAMQMAY   | 0,5261 |
| B07 | HLA-B*56:16 | 1052 | FPQSAPHGV   | 0,6463 |
| B07 | HLA-B*56:16 | 1089 | FPREGVFVS   | 0,7472 |
| B07 | HLA-B*67:01 | 24   | LPPAYTNSF   | 0,6526 |
| B07 | HLA-B*67:01 | 38   | YDPKVFRSSV  | 0,5867 |
| B07 | HLA-B*67:01 | 38   | YDPKVFRSSVL | 0,5124 |
| B07 | HLA-B*67:01 | 84   | LPFNDGVYF   | 0,8292 |
| B07 | HLA-B*67:01 | 208  | TPINLVRDL   | 0,7949 |
| B07 | HLA-B*67:01 | 216  | LPQGFSAL    | 0,5784 |
| B07 | HLA-B*67:01 | 229  | LPIGINITRF  | 0,5824 |
| B07 | HLA-B*67:01 | 321  | QPTESIVRF   | 0,6782 |
| B07 | HLA-B*67:01 | 506  | QPYRVVVL    | 0,5066 |
| B07 | HLA-B*67:01 | 714  | IPTNFTISV   | 0,8295 |
| B07 | HLA-B*67:01 | 861  | LPPLLTDEM   | 0,5088 |
| B07 | HLA-B*67:01 | 896  | IPFAMQMAY   | 0,5126 |
| B07 | HLA-B*67:01 | 1052 | FPQSAPHGV   | 0,7937 |
| B07 | HLA-B*67:01 | 1052 | FPQSAPHGVVF | 0,6798 |
| B07 | HLA-B*67:01 | 1262 | EPVLKGVKL   | 0,7213 |
| B07 | HLA-B*78:01 | 714  | IPTNFTISV   | 0,7595 |
| B07 | HLA-B*78:01 | 1052 | FPQSAPHGV   | 0,6988 |
| B07 | HLA-B*78:01 | 1089 | FPREGVFS    | 0,6628 |
| B07 | HLA-B*78:01 | 1089 | FPREGVFVS   | 0,5573 |
| B07 | HLA-B*78:02 | 714  | IPTNFTISV   | 0,7684 |
| B07 | HLA-B*78:04 | 714  | IPTNFTISV   | 0,7551 |
| B07 | HLA-B*78:04 | 1089 | FPREGVFVS   | 0,5305 |
| B08 | HLA-B*08:01 | 17   | NLTTTRTQL   | 0,5899 |
| B08 | HLA-B*08:01 | 233  | INITRFQTL   | 0,7017 |
| B08 | HLA-B*08:01 | 234  | NITRFQTL    | 0,7511 |
| B08 | HLA-B*08:01 | 241  | LLALHRSYL   | 0,5553 |
| B08 | HLA-B*08:01 | 269  | YLQPRTFL    | 0,7406 |
| B08 | HLA-B*08:01 | 269  | YLQPRTFLL   | 0,7867 |
| B08 | HLA-B*08:01 | 506  | QPYRVVVL    | 0,766  |
| B08 | HLA-B*08:01 | 821  | LLFNKVTL    | 0,6195 |
| B08 | HLA-B*08:01 | 996  | LITGRLQSL   | 0,5644 |
| B08 | HLA-B*08:07 | 233  | INITRFQTL   | 0,6349 |
| B08 | HLA-B*08:07 | 234  | NITRFQTL    | 0,6414 |
| B08 | HLA-B*08:07 | 269  | YLQPRTFL    | 0,6444 |
| B08 | HLA-B*08:07 | 269  | YLQPRTFLL   | 0,7258 |
| B08 | HLA-B*08:07 | 506  | QPYRVVVL    | 0,7156 |

|     |             |     |           |        |
|-----|-------------|-----|-----------|--------|
| B08 | HLA-B*08:07 | 821 | LLFNKVTL  | 0,5358 |
| B08 | HLA-B*08:07 | 996 | LITGRLQSL | 0,5316 |
| B08 | HLA-B*08:09 | 269 | YLQPRTFLL | 0,5745 |
| B08 | HLA-B*08:11 | 17  | NLTTTRTQL | 0,5719 |
| B08 | HLA-B*08:11 | 233 | INITRFQTL | 0,6926 |
| B08 | HLA-B*08:11 | 234 | NITRFQTL  | 0,7381 |
| B08 | HLA-B*08:11 | 241 | LLALHRSYL | 0,5524 |
| B08 | HLA-B*08:11 | 269 | YLQPRTFLL | 0,7196 |
| B08 | HLA-B*08:11 | 269 | YLQPRTFLL | 0,7806 |
| B08 | HLA-B*08:11 | 506 | QPYRVVVL  | 0,7665 |
| B08 | HLA-B*08:11 | 821 | LLFNKVTL  | 0,5958 |
| B08 | HLA-B*08:11 | 996 | LITGRLQSL | 0,5708 |
| B08 | HLA-B*08:13 | 233 | INITRFQTL | 0,5821 |
| B08 | HLA-B*08:13 | 269 | YLQPRTFLL | 0,5148 |
| B08 | HLA-B*08:13 | 269 | YLQPRTFLL | 0,6693 |
| B08 | HLA-B*08:13 | 506 | QPYRVVVL  | 0,6559 |
| B08 | HLA-B*08:15 | 233 | INITRFQTL | 0,6284 |
| B08 | HLA-B*08:15 | 234 | NITRFQTL  | 0,5714 |
| B08 | HLA-B*08:15 | 269 | YLQPRTFLL | 0,6627 |
| B08 | HLA-B*08:15 | 269 | YLQPRTFLL | 0,7736 |
| B08 | HLA-B*08:15 | 821 | LLFNKVTL  | 0,507  |
| B08 | HLA-B*08:18 | 17  | NLTTTRTQL | 0,5899 |
| B08 | HLA-B*08:18 | 233 | INITRFQTL | 0,7017 |
| B08 | HLA-B*08:18 | 234 | NITRFQTL  | 0,7511 |
| B08 | HLA-B*08:18 | 241 | LLALHRSYL | 0,5553 |
| B08 | HLA-B*08:18 | 269 | YLQPRTFLL | 0,7406 |
| B08 | HLA-B*08:18 | 269 | YLQPRTFLL | 0,7867 |
| B08 | HLA-B*08:18 | 506 | QPYRVVVL  | 0,766  |
| B08 | HLA-B*08:18 | 821 | LLFNKVTL  | 0,6195 |
| B08 | HLA-B*08:18 | 996 | LITGRLQSL | 0,5644 |
| B08 | HLA-B*08:20 | 241 | LLALHRSYL | 0,5123 |
| B08 | HLA-B*08:20 | 269 | YLQPRTFLL | 0,5485 |
| B08 | HLA-B*08:20 | 269 | YLQPRTFLL | 0,6503 |
| B08 | HLA-B*08:20 | 869 | MIAQYTSAL | 0,5115 |
| B08 | HLA-B*08:21 | 233 | INITRFQTL | 0,5468 |
| B08 | HLA-B*08:21 | 234 | NITRFQTL  | 0,598  |
| B08 | HLA-B*08:21 | 269 | YLQPRTFLL | 0,5663 |
| B08 | HLA-B*08:21 | 269 | YLQPRTFLL | 0,6617 |
| B08 | HLA-B*08:21 | 506 | QPYRVVVL  | 0,6419 |
| B08 | HLA-B*08:22 | 17  | NLTTTRTQL | 0,5899 |
| B08 | HLA-B*08:22 | 233 | INITRFQTL | 0,7017 |
| B08 | HLA-B*08:22 | 234 | NITRFQTL  | 0,7511 |
| B08 | HLA-B*08:22 | 241 | LLALHRSYL | 0,5553 |
| B08 | HLA-B*08:22 | 269 | YLQPRTFLL | 0,7406 |
| B08 | HLA-B*08:22 | 269 | YLQPRTFLL | 0,7867 |
| B08 | HLA-B*08:22 | 506 | QPYRVVVL  | 0,766  |
| B08 | HLA-B*08:22 | 821 | LLFNKVTL  | 0,6195 |
| B08 | HLA-B*08:22 | 996 | LITGRLQSL | 0,5644 |
| B08 | HLA-B*08:23 | 269 | YLQPRTFLL | 0,5575 |
| B08 | HLA-B*08:23 | 269 | YLQPRTFLL | 0,6446 |

|     |             |     |             |        |
|-----|-------------|-----|-------------|--------|
| B08 | HLA-B*08:23 | 821 | LLFNKVTL    | 0,5015 |
| B08 | HLA-B*08:24 | 17  | NLTTTRTQL   | 0,5899 |
| B08 | HLA-B*08:24 | 233 | INITRFQTL   | 0,7017 |
| B08 | HLA-B*08:24 | 234 | NITRFQTL    | 0,7511 |
| B08 | HLA-B*08:24 | 241 | LLALHRSYL   | 0,5553 |
| B08 | HLA-B*08:24 | 269 | YLQPRTFL    | 0,7406 |
| B08 | HLA-B*08:24 | 269 | YLQPRTFLL   | 0,7867 |
| B08 | HLA-B*08:24 | 506 | QPYRVVVL    | 0,766  |
| B08 | HLA-B*08:24 | 821 | LLFNKVTL    | 0,6195 |
| B08 | HLA-B*08:24 | 996 | LITGRLQSL   | 0,5644 |
| B08 | HLA-B*08:25 | 269 | YLQPRTFLL   | 0,5151 |
| B27 | HLA-B*14:01 | 236 | TRFQTLAL    | 0,8018 |
| B27 | HLA-B*14:01 | 453 | YRLFRKSNL   | 0,6967 |
| B27 | HLA-B*14:02 | 236 | TRFQTLAL    | 0,8018 |
| B27 | HLA-B*14:02 | 453 | YRLFRKSNL   | 0,6967 |
| B27 | HLA-B*14:03 | 236 | TRFQTLAL    | 0,6892 |
| B27 | HLA-B*14:03 | 453 | YRLFRKSNL   | 0,576  |
| B27 | HLA-B*14:06 | 236 | TRFQTLAL    | 0,8675 |
| B27 | HLA-B*14:06 | 764 | NRALTGIIV   | 0,7167 |
| B27 | HLA-B*15:03 | 20  | TRTQLPPAY   | 0,7211 |
| B27 | HLA-B*15:03 | 22  | TQLPPAYTNSF | 0,6455 |
| B27 | HLA-B*15:03 | 35  | GVYYPKVVF   | 0,6663 |
| B27 | HLA-B*15:03 | 47  | VLHSTQDLF   | 0,5243 |
| B27 | HLA-B*15:03 | 77  | KRFDNPVLPF  | 0,8296 |
| B27 | HLA-B*15:03 | 184 | GNFKNREF    | 0,6499 |
| B27 | HLA-B*15:03 | 186 | FKNREFVF    | 0,5195 |
| B27 | HLA-B*15:03 | 192 | FVFKNIDGY   | 0,5282 |
| B27 | HLA-B*15:03 | 212 | LVRDLPQGF   | 0,576  |
| B27 | HLA-B*15:03 | 236 | TRFQTLAL    | 0,608  |
| B27 | HLA-B*15:03 | 240 | TLLALHRSY   | 0,6413 |
| B27 | HLA-B*15:03 | 261 | GAAAYVGY    | 0,5148 |
| B27 | HLA-B*15:03 | 267 | VGYLQPRTF   | 0,643  |
| B27 | HLA-B*15:03 | 320 | VQPTESIVRF  | 0,5258 |
| B27 | HLA-B*15:03 | 327 | VRFPNITNL   | 0,8039 |
| B27 | HLA-B*15:03 | 339 | GEVFNATRF   | 0,7209 |
| B27 | HLA-B*15:03 | 345 | TRFASVYAW   | 0,6043 |
| B27 | HLA-B*15:03 | 366 | SVLYNSASF   | 0,5032 |
| B27 | HLA-B*15:03 | 369 | YNSASFSTF   | 0,7633 |
| B27 | HLA-B*15:03 | 408 | RQIAPGQTG   | 0,5804 |
| B27 | HLA-B*15:03 | 413 | GQTGKIADY   | 0,8037 |
| B27 | HLA-B*15:03 | 443 | SKVGGNYNY   | 0,9112 |
| B27 | HLA-B*15:03 | 456 | FRKSNLKP    | 0,5235 |
| B27 | HLA-B*15:03 | 464 | FERDISTEY   | 0,635  |
| B27 | HLA-B*15:03 | 497 | FQPTNGVGY   | 0,8242 |
| B27 | HLA-B*15:03 | 557 | KKFLPFQQF   | 0,9568 |
| B27 | HLA-B*15:03 | 628 | QLTPTWRVY   | 0,5065 |
| B27 | HLA-B*15:03 | 634 | RVYSTGSNVF  | 0,7212 |
| B27 | HLA-B*15:03 | 687 | VASQSIAY    | 0,7907 |
| B27 | HLA-B*15:03 | 689 | SQSIAYTM    | 0,7655 |
| B27 | HLA-B*15:03 | 699 | LGAENSVAY   | 0,5647 |

|     |             |      |             |        |
|-----|-------------|------|-------------|--------|
| B27 | HLA-B*15:03 | 710  | NSIAIPTNF   | 0,5451 |
| B27 | HLA-B*15:03 | 789  | YKTPPIKDF   | 0,8036 |
| B27 | HLA-B*15:03 | 794  | IKDFGGFNF   | 0,7241 |
| B27 | HLA-B*15:03 | 815  | RSFIEDLLF   | 0,624  |
| B27 | HLA-B*15:03 | 852  | AQKFNGLTV   | 0,6121 |
| B27 | HLA-B*15:03 | 852  | AQKFNGLTVL  | 0,5743 |
| B27 | HLA-B*15:03 | 853  | QKFNGLTVL   | 0,7866 |
| B27 | HLA-B*15:03 | 880  | GTITSGWTF   | 0,5063 |
| B27 | HLA-B*15:03 | 893  | ALQIPFAMQM  | 0,5298 |
| B27 | HLA-B*15:03 | 894  | LQIPFAMQM   | 0,9192 |
| B27 | HLA-B*15:03 | 919  | NQKLIANQF   | 0,8596 |
| B27 | HLA-B*15:03 | 999  | GRLQSLQTY   | 0,8486 |
| B27 | HLA-B*15:03 | 1044 | GKGYHLMSF   | 0,7673 |
| B27 | HLA-B*15:03 | 1054 | QSAPHGVVF   | 0,8355 |
| B27 | HLA-B*15:03 | 1087 | AHFPREGVF   | 0,7921 |
| B27 | HLA-B*15:03 | 1113 | QIITDNTF    | 0,5046 |
| B27 | HLA-B*15:03 | 1130 | IGIVNNTVY   | 0,5224 |
| B27 | HLA-B*15:03 | 1264 | VLKGVKLHY   | 0,6224 |
| B27 | HLA-B*15:18 | 20   | TRTQLPPAY   | 0,7269 |
| B27 | HLA-B*15:18 | 236  | TRFQTLAL    | 0,6174 |
| B27 | HLA-B*15:18 | 1087 | AHFPREGVF   | 0,6545 |
| B27 | HLA-B*15:47 | 77   | KRFDNPVLPF  | 0,5237 |
| B27 | HLA-B*15:47 | 339  | GEVFNATRF   | 0,6636 |
| B27 | HLA-B*15:47 | 369  | YNSASFSTF   | 0,5152 |
| B27 | HLA-B*15:47 | 413  | GQTGKIADY   | 0,5603 |
| B27 | HLA-B*15:47 | 464  | FERDISTEY   | 0,5227 |
| B27 | HLA-B*15:47 | 557  | KKFLPFQQF   | 0,7088 |
| B27 | HLA-B*15:47 | 687  | VASQSIIAY   | 0,5883 |
| B27 | HLA-B*15:47 | 689  | SQSIIAYTM   | 0,6903 |
| B27 | HLA-B*15:47 | 852  | AQKFNGLTVL  | 0,503  |
| B27 | HLA-B*15:47 | 894  | LQIPFAMQM   | 0,6781 |
| B27 | HLA-B*15:47 | 919  | NQKLIANQF   | 0,6441 |
| B27 | HLA-B*15:47 | 1054 | QSAPHGVVF   | 0,5973 |
| B27 | HLA-B*15:47 | 1087 | AHFPREGVF   | 0,5178 |
| B27 | HLA-B*15:49 | 77   | KRFDNPVLPF  | 0,5237 |
| B27 | HLA-B*15:49 | 339  | GEVFNATRF   | 0,6636 |
| B27 | HLA-B*15:49 | 369  | YNSASFSTF   | 0,5152 |
| B27 | HLA-B*15:49 | 413  | GQTGKIADY   | 0,5603 |
| B27 | HLA-B*15:49 | 464  | FERDISTEY   | 0,5227 |
| B27 | HLA-B*15:49 | 557  | KKFLPFQQF   | 0,7088 |
| B27 | HLA-B*15:49 | 687  | VASQSIIAY   | 0,5883 |
| B27 | HLA-B*15:49 | 689  | SQSIIAYTM   | 0,6903 |
| B27 | HLA-B*15:49 | 852  | AQKFNGLTVL  | 0,503  |
| B27 | HLA-B*15:49 | 894  | LQIPFAMQM   | 0,6781 |
| B27 | HLA-B*15:49 | 919  | NQKLIANQF   | 0,6441 |
| B27 | HLA-B*15:49 | 1054 | QSAPHGVVF   | 0,5973 |
| B27 | HLA-B*15:49 | 1087 | AHFPREGVF   | 0,5178 |
| B27 | HLA-B*15:52 | 236  | TRFQTLAL    | 0,6881 |
| B27 | HLA-B*15:54 | 20   | TRTQLPPAY   | 0,6536 |
| B27 | HLA-B*15:54 | 22   | TQLPPAYTNSF | 0,5407 |

|     |             |      |            |        |
|-----|-------------|------|------------|--------|
| B27 | HLA-B*15:54 | 35   | GVYYPDKVF  | 0,5415 |
| B27 | HLA-B*15:54 | 77   | KRFDNPVLPF | 0,707  |
| B27 | HLA-B*15:54 | 212  | LVRDLPQGF  | 0,5164 |
| B27 | HLA-B*15:54 | 240  | TLLALHRSY  | 0,5397 |
| B27 | HLA-B*15:54 | 320  | VQPTESIVRF | 0,5256 |
| B27 | HLA-B*15:54 | 339  | GEVFNATRF  | 0,706  |
| B27 | HLA-B*15:54 | 369  | YNSASFSTF  | 0,659  |
| B27 | HLA-B*15:54 | 408  | RQIAPGQTG  | 0,5392 |
| B27 | HLA-B*15:54 | 413  | GQTGKIADY  | 0,8083 |
| B27 | HLA-B*15:54 | 443  | SKVGGNYNY  | 0,849  |
| B27 | HLA-B*15:54 | 456  | FRKSNLKPF  | 0,5182 |
| B27 | HLA-B*15:54 | 464  | FERDISTEII | 0,7035 |
| B27 | HLA-B*15:54 | 497  | FQPTNGVGY  | 0,7908 |
| B27 | HLA-B*15:54 | 557  | KKFLPFQQF  | 0,8533 |
| B27 | HLA-B*15:54 | 634  | RVYSTGSNVF | 0,6621 |
| B27 | HLA-B*15:54 | 687  | VASQSIIAY  | 0,6625 |
| B27 | HLA-B*15:54 | 689  | SQSIIAYTM  | 0,6728 |
| B27 | HLA-B*15:54 | 789  | YKTPPIKDF  | 0,6416 |
| B27 | HLA-B*15:54 | 852  | AQKFNGLTV  | 0,5786 |
| B27 | HLA-B*15:54 | 852  | AQKFNGLTVL | 0,5715 |
| B27 | HLA-B*15:54 | 853  | QKFNGLTVL  | 0,5953 |
| B27 | HLA-B*15:54 | 894  | LQIPFAMQM  | 0,7958 |
| B27 | HLA-B*15:54 | 919  | NQKLIANQF  | 0,8585 |
| B27 | HLA-B*15:54 | 999  | GRLQSLQTY  | 0,757  |
| B27 | HLA-B*15:54 | 1044 | GKGYHLMSF  | 0,6503 |
| B27 | HLA-B*15:54 | 1054 | QSAPHGVVF  | 0,7441 |
| B27 | HLA-B*15:54 | 1087 | AHFPREGVF  | 0,6276 |
| B27 | HLA-B*15:54 | 1264 | VLKGVKLHY  | 0,6417 |
| B27 | HLA-B*15:61 | 20   | TRTQLPPAY  | 0,771  |
| B27 | HLA-B*15:61 | 35   | GVYYPDKVF  | 0,5503 |
| B27 | HLA-B*15:61 | 77   | KRFDNPVLPF | 0,8652 |
| B27 | HLA-B*15:61 | 236  | TRFQTLAL   | 0,7603 |
| B27 | HLA-B*15:61 | 318  | FRVQPTESI  | 0,5563 |
| B27 | HLA-B*15:61 | 327  | VRFPNITNL  | 0,9057 |
| B27 | HLA-B*15:61 | 345  | TRFASVYAW  | 0,6322 |
| B27 | HLA-B*15:61 | 369  | YNSASFSTF  | 0,5292 |
| B27 | HLA-B*15:61 | 413  | GQTGKIADY  | 0,6318 |
| B27 | HLA-B*15:61 | 443  | SKVGGNYNY  | 0,8055 |
| B27 | HLA-B*15:61 | 456  | FRKSNLKPF  | 0,5874 |
| B27 | HLA-B*15:61 | 497  | FQPTNGVGY  | 0,6258 |
| B27 | HLA-B*15:61 | 557  | KKFLPFQQF  | 0,895  |
| B27 | HLA-B*15:61 | 634  | RVYSTGSNVF | 0,5973 |
| B27 | HLA-B*15:61 | 687  | VASQSIIAY  | 0,5972 |
| B27 | HLA-B*15:61 | 689  | SQSIIAYTM  | 0,6401 |
| B27 | HLA-B*15:61 | 789  | YKTPPIKDF  | 0,7085 |
| B27 | HLA-B*15:61 | 794  | IKDFGGFNF  | 0,5487 |
| B27 | HLA-B*15:61 | 852  | AQKFNGLTV  | 0,6105 |
| B27 | HLA-B*15:61 | 852  | AQKFNGLTVL | 0,5775 |
| B27 | HLA-B*15:61 | 853  | QKFNGLTVL  | 0,7774 |
| B27 | HLA-B*15:61 | 894  | LQIPFAMQM  | 0,7963 |



|     |             |      |             |        |
|-----|-------------|------|-------------|--------|
| B27 | HLA-B*15:61 | 919  | NQKLIANQF   | 0,6902 |
| B27 | HLA-B*15:61 | 999  | GRLQSLQTY   | 0,8572 |
| B27 | HLA-B*15:61 | 1038 | KRVDFCGKGY  | 0,5634 |
| B27 | HLA-B*15:61 | 1044 | GKGYHLMSF   | 0,636  |
| B27 | HLA-B*15:61 | 1054 | QSAPHGVVF   | 0,6853 |
| B27 | HLA-B*15:61 | 1087 | AHFPREGVF   | 0,6534 |
| B27 | HLA-B*15:61 | 1264 | VLKGVKLHY   | 0,5156 |
| B27 | HLA-B*15:62 | 20   | TRTQLPPAY   | 0,7053 |
| B27 | HLA-B*15:62 | 22   | TQLPPAYTNSF | 0,6112 |
| B27 | HLA-B*15:62 | 30   | NSFTRGVYY   | 0,5218 |
| B27 | HLA-B*15:62 | 35   | GVYYPDKVF   | 0,6492 |
| B27 | HLA-B*15:62 | 47   | VLHSTQDLF   | 0,5047 |
| B27 | HLA-B*15:62 | 77   | KRFDPVLPF   | 0,7733 |
| B27 | HLA-B*15:62 | 184  | GNFKNREF    | 0,6307 |
| B27 | HLA-B*15:62 | 192  | FVFKNIDGY   | 0,5448 |
| B27 | HLA-B*15:62 | 212  | LVRDLPQGF   | 0,5648 |
| B27 | HLA-B*15:62 | 236  | TRFQTLAL    | 0,573  |
| B27 | HLA-B*15:62 | 240  | TLLALHRSY   | 0,6832 |
| B27 | HLA-B*15:62 | 261  | GAAAYVGY    | 0,5324 |
| B27 | HLA-B*15:62 | 267  | VGYLQPRTF   | 0,6274 |
| B27 | HLA-B*15:62 | 327  | VRFPNITNL   | 0,7421 |
| B27 | HLA-B*15:62 | 339  | GEVFNATRF   | 0,7077 |
| B27 | HLA-B*15:62 | 345  | TRFASVYAW   | 0,577  |
| B27 | HLA-B*15:62 | 366  | SVLYNSASF   | 0,5129 |
| B27 | HLA-B*15:62 | 369  | YNSASFSTF   | 0,746  |
| B27 | HLA-B*15:62 | 408  | RQIAPGQTG   | 0,5385 |
| B27 | HLA-B*15:62 | 413  | GQTGKIADY   | 0,813  |
| B27 | HLA-B*15:62 | 443  | SKVGGNYNY   | 0,9183 |
| B27 | HLA-B*15:62 | 464  | FERDISTEY   | 0,6286 |
| B27 | HLA-B*15:62 | 497  | FQPTNGVGY   | 0,8232 |
| B27 | HLA-B*15:62 | 557  | KKFLPFQQF   | 0,9461 |
| B27 | HLA-B*15:62 | 628  | QLTPTWRVY   | 0,5393 |
| B27 | HLA-B*15:62 | 634  | RVYSTGSNVF  | 0,7129 |
| B27 | HLA-B*15:62 | 687  | VASQSIAY    | 0,7985 |
| B27 | HLA-B*15:62 | 689  | SQSIIAYTM   | 0,7527 |
| B27 | HLA-B*15:62 | 699  | LGAENSVAY   | 0,5751 |
| B27 | HLA-B*15:62 | 710  | NSIAIPTNF   | 0,5361 |
| B27 | HLA-B*15:62 | 789  | YKTPIKDF    | 0,7655 |
| B27 | HLA-B*15:62 | 794  | IKDFGGFNF   | 0,6781 |
| B27 | HLA-B*15:62 | 815  | RSFIEDLLF   | 0,5936 |
| B27 | HLA-B*15:62 | 852  | AQKFNGLTV   | 0,582  |
| B27 | HLA-B*15:62 | 852  | AQKFNGLTVL  | 0,5232 |
| B27 | HLA-B*15:62 | 853  | QKFNGLTVL   | 0,7613 |
| B27 | HLA-B*15:62 | 893  | ALQIPFAMQM  | 0,5135 |
| B27 | HLA-B*15:62 | 894  | LQIPFAMQM   | 0,911  |
| B27 | HLA-B*15:62 | 896  | IPFAMQMAY   | 0,5327 |
| B27 | HLA-B*15:62 | 919  | NQKLIANQF   | 0,8564 |
| B27 | HLA-B*15:62 | 999  | GRLQSLQTY   | 0,8305 |
| B27 | HLA-B*15:62 | 1044 | GKGYHLMSF   | 0,7316 |
| B27 | HLA-B*15:62 | 1054 | QSAPHGVVF   | 0,8256 |

|     |             |      |             |        |
|-----|-------------|------|-------------|--------|
| B27 | HLA-B*15:62 | 1087 | AHFPREGVF   | 0,7587 |
| B27 | HLA-B*15:62 | 1113 | QIITDNTF    | 0,5006 |
| B27 | HLA-B*15:62 | 1130 | IGIVNNTVY   | 0,5213 |
| B27 | HLA-B*15:62 | 1264 | VLKGVKLHY   | 0,645  |
| B27 | HLA-B*15:69 | 20   | TRTQLPPAY   | 0,7227 |
| B27 | HLA-B*15:69 | 22   | TQLPPAYTNSF | 0,5591 |
| B27 | HLA-B*15:69 | 35   | GVVYYPDKVF  | 0,5772 |
| B27 | HLA-B*15:69 | 77   | KRFDNPVLPF  | 0,851  |
| B27 | HLA-B*15:69 | 184  | GNFKNREF    | 0,546  |
| B27 | HLA-B*15:69 | 236  | TRFQTLAL    | 0,6858 |
| B27 | HLA-B*15:69 | 240  | TLLALHRSY   | 0,525  |
| B27 | HLA-B*15:69 | 267  | VGYLQPRTF   | 0,5372 |
| B27 | HLA-B*15:69 | 327  | VRFPNITNL   | 0,8345 |
| B27 | HLA-B*15:69 | 339  | GEVFNATRF   | 0,7224 |
| B27 | HLA-B*15:69 | 345  | TRFASVYAW   | 0,5818 |
| B27 | HLA-B*15:69 | 369  | YNSASFSTF   | 0,6438 |
| B27 | HLA-B*15:69 | 408  | RQIAPGQTG   | 0,5308 |
| B27 | HLA-B*15:69 | 413  | GQTGKIADY   | 0,7354 |
| B27 | HLA-B*15:69 | 443  | SKVGGNYNY   | 0,8229 |
| B27 | HLA-B*15:69 | 464  | FERDISTEY   | 0,6128 |
| B27 | HLA-B*15:69 | 497  | FQPTNGVGY   | 0,674  |
| B27 | HLA-B*15:69 | 505  | YQPYRVVVL   | 0,5216 |
| B27 | HLA-B*15:69 | 557  | KKFLPFQQF   | 0,9341 |
| B27 | HLA-B*15:69 | 634  | RVYSTGSNVF  | 0,6281 |
| B27 | HLA-B*15:69 | 687  | VASQSIAY    | 0,6873 |
| B27 | HLA-B*15:69 | 689  | SQSIAYTM    | 0,7524 |
| B27 | HLA-B*15:69 | 789  | YKTPPIKDF   | 0,6877 |
| B27 | HLA-B*15:69 | 794  | IKDFGGFNF   | 0,691  |
| B27 | HLA-B*15:69 | 815  | RSFIEDLLF   | 0,5525 |
| B27 | HLA-B*15:69 | 852  | AQKFNGLTV   | 0,584  |
| B27 | HLA-B*15:69 | 852  | AQKFNGLTVL  | 0,6049 |
| B27 | HLA-B*15:69 | 853  | QKFNGLTVL   | 0,7612 |
| B27 | HLA-B*15:69 | 893  | ALQIPFAMQM  | 0,5311 |
| B27 | HLA-B*15:69 | 894  | LQIPFAMQM   | 0,8912 |
| B27 | HLA-B*15:69 | 919  | NQKLIANQF   | 0,8102 |
| B27 | HLA-B*15:69 | 999  | GRLQSLQTY   | 0,8376 |
| B27 | HLA-B*15:69 | 1016 | AEIRASANL   | 0,5219 |
| B27 | HLA-B*15:69 | 1038 | KRVDFCGKGY  | 0,5143 |
| B27 | HLA-B*15:69 | 1044 | GKGYHLMSF   | 0,7181 |
| B27 | HLA-B*15:69 | 1054 | QSAPHGVVF   | 0,7141 |
| B27 | HLA-B*15:69 | 1087 | AHFPREGVF   | 0,769  |
| B27 | HLA-B*15:69 | 1264 | VLKGVKLHY   | 0,5553 |
| B27 | HLA-B*15:72 | 20   | TRTQLPPAY   | 0,7269 |
| B27 | HLA-B*15:72 | 236  | TRFQTLAL    | 0,6174 |
| B27 | HLA-B*15:72 | 1087 | AHFPREGVF   | 0,6545 |
| B27 | HLA-B*15:74 | 20   | TRTQLPPAY   | 0,712  |
| B27 | HLA-B*15:74 | 22   | TQLPPAYTNSF | 0,6447 |
| B27 | HLA-B*15:74 | 30   | NSFTRGVYY   | 0,5264 |
| B27 | HLA-B*15:74 | 35   | GVVYYPDKVF  | 0,6849 |
| B27 | HLA-B*15:74 | 47   | VLHSTQDLF   | 0,519  |

|     |             |      |            |        |
|-----|-------------|------|------------|--------|
| B27 | HLA-B*15:74 | 77   | KRFDNPVLPF | 0,8142 |
| B27 | HLA-B*15:74 | 84   | LPFNDGVYF  | 0,5129 |
| B27 | HLA-B*15:74 | 184  | GNFKNLREF  | 0,6596 |
| B27 | HLA-B*15:74 | 186  | FKNLREFVF  | 0,5086 |
| B27 | HLA-B*15:74 | 192  | FVFKNIDGY  | 0,5716 |
| B27 | HLA-B*15:74 | 212  | LVRDLPQGF  | 0,5986 |
| B27 | HLA-B*15:74 | 236  | TRFQTLAL   | 0,6029 |
| B27 | HLA-B*15:74 | 240  | TLLALHRSY  | 0,6632 |
| B27 | HLA-B*15:74 | 261  | GAAAYVGY   | 0,5496 |
| B27 | HLA-B*15:74 | 267  | VGYLQPRTF  | 0,6398 |
| B27 | HLA-B*15:74 | 320  | VQPTESIVRF | 0,5264 |
| B27 | HLA-B*15:74 | 327  | VRFPNITNL  | 0,7868 |
| B27 | HLA-B*15:74 | 339  | GEVFNATRF  | 0,7102 |
| B27 | HLA-B*15:74 | 345  | TRFASVYAW  | 0,583  |
| B27 | HLA-B*15:74 | 366  | SVLYNSASF  | 0,5392 |
| B27 | HLA-B*15:74 | 369  | YNSASFSTF  | 0,7528 |
| B27 | HLA-B*15:74 | 408  | RQIAPGQTG  | 0,5683 |
| B27 | HLA-B*15:74 | 413  | GQTGKIADY  | 0,7923 |
| B27 | HLA-B*15:74 | 443  | SKVGGNYNY  | 0,9075 |
| B27 | HLA-B*15:74 | 456  | FRKSNLKP   | 0,5033 |
| B27 | HLA-B*15:74 | 464  | FERDISTEY  | 0,6276 |
| B27 | HLA-B*15:74 | 497  | FQPTNGVGY  | 0,8159 |
| B27 | HLA-B*15:74 | 557  | KKFLPFQQF  | 0,96   |
| B27 | HLA-B*15:74 | 628  | QLTPTWRVY  | 0,5215 |
| B27 | HLA-B*15:74 | 634  | RVYSTGSNVF | 0,7445 |
| B27 | HLA-B*15:74 | 687  | VASQSIAY   | 0,7995 |
| B27 | HLA-B*15:74 | 689  | SQSIAYTM   | 0,7813 |
| B27 | HLA-B*15:74 | 699  | LGAENSVAY  | 0,5653 |
| B27 | HLA-B*15:74 | 710  | NSIAIPTNF  | 0,5635 |
| B27 | HLA-B*15:74 | 789  | YKTPPIKDF  | 0,7759 |
| B27 | HLA-B*15:74 | 794  | IKDFGGFNF  | 0,6901 |
| B27 | HLA-B*15:74 | 815  | RSFIEDLLF  | 0,6421 |
| B27 | HLA-B*15:74 | 852  | AQKFNGLTV  | 0,6162 |
| B27 | HLA-B*15:74 | 852  | AQKFNGLTVL | 0,5897 |
| B27 | HLA-B*15:74 | 853  | QKFNGLTVL  | 0,772  |
| B27 | HLA-B*15:74 | 880  | GTITSGWTF  | 0,5407 |
| B27 | HLA-B*15:74 | 893  | ALQIPFAMQM | 0,57   |
| B27 | HLA-B*15:74 | 894  | LQIPFAMQM  | 0,9324 |
| B27 | HLA-B*15:74 | 896  | IPFAMQMAY  | 0,5172 |
| B27 | HLA-B*15:74 | 919  | NQKLIANQF  | 0,843  |
| B27 | HLA-B*15:74 | 999  | GRLQSLQTY  | 0,8373 |
| B27 | HLA-B*15:74 | 1044 | GKGYHLMSF  | 0,7534 |
| B27 | HLA-B*15:74 | 1054 | QSAPHGVVF  | 0,8478 |
| B27 | HLA-B*15:74 | 1087 | AHFPREGVF  | 0,7577 |
| B27 | HLA-B*15:74 | 1113 | QIITDNTF   | 0,5173 |
| B27 | HLA-B*15:74 | 1130 | IGIVNNTVY  | 0,5267 |
| B27 | HLA-B*15:74 | 1264 | VLKGVKLHY  | 0,6447 |
| B27 | HLA-B*15:80 | 20   | TRTQLPPAY  | 0,7191 |
| B27 | HLA-B*15:80 | 236  | TRFQTLAL   | 0,5772 |
| B27 | HLA-B*15:80 | 1087 | AHFPREGVF  | 0,5968 |

|     |             |      |             |        |
|-----|-------------|------|-------------|--------|
| B27 | HLA-B*15:91 | 153  | MESEFRVY    | 0,6327 |
| B27 | HLA-B*15:91 | 297  | SETKCTLKSF  | 0,5716 |
| B27 | HLA-B*15:91 | 339  | GEVFNATRF   | 0,8899 |
| B27 | HLA-B*15:91 | 464  | FERDISTEY   | 0,7127 |
| B27 | HLA-B*15:91 | 653  | AEHVNNSY    | 0,6902 |
| B27 | HLA-B*15:91 | 689  | SQSIIAYTM   | 0,5235 |
| B27 | HLA-B*15:91 | 919  | NQKLIANQF   | 0,6049 |
| B27 | HLA-B*15:91 | 1016 | AEIRASANL   | 0,7495 |
| B27 | HLA-B*15:91 | 1201 | QELGKYEYQ   | 0,8926 |
| B27 | HLA-B*15:93 | 236  | TRFQTLAL    | 0,7254 |
| B27 | HLA-B*15:93 | 1087 | AHFPREGVF   | 0,7077 |
| B27 | HLA-B*15:98 | 20   | TRTQLPPAY   | 0,7211 |
| B27 | HLA-B*15:98 | 22   | TQLPPAYTNSF | 0,6455 |
| B27 | HLA-B*15:98 | 35   | GVYYPDKVF   | 0,6663 |
| B27 | HLA-B*15:98 | 47   | VLHSTQDLF   | 0,5243 |
| B27 | HLA-B*15:98 | 77   | KRFDNPVLPF  | 0,8296 |
| B27 | HLA-B*15:98 | 184  | GNFKNREF    | 0,6499 |
| B27 | HLA-B*15:98 | 186  | FKNLREFVF   | 0,5195 |
| B27 | HLA-B*15:98 | 192  | FVFKNIDGY   | 0,5282 |
| B27 | HLA-B*15:98 | 212  | LVRDLPQGF   | 0,576  |
| B27 | HLA-B*15:98 | 236  | TRFQTLAL    | 0,608  |
| B27 | HLA-B*15:98 | 240  | TLLALHRSY   | 0,6413 |
| B27 | HLA-B*15:98 | 261  | GAAAYVGY    | 0,5148 |
| B27 | HLA-B*15:98 | 267  | VGYLQPRTF   | 0,643  |
| B27 | HLA-B*15:98 | 320  | VQPTESIVRF  | 0,5258 |
| B27 | HLA-B*15:98 | 327  | VRFPNITNL   | 0,8039 |
| B27 | HLA-B*15:98 | 339  | GEVFNATRF   | 0,7209 |
| B27 | HLA-B*15:98 | 345  | TRFASVYAW   | 0,6043 |
| B27 | HLA-B*15:98 | 366  | SVLYNSASF   | 0,5032 |
| B27 | HLA-B*15:98 | 369  | YNSASFSTF   | 0,7633 |
| B27 | HLA-B*15:98 | 408  | RQIAPGQTG   | 0,5804 |
| B27 | HLA-B*15:98 | 413  | GQTGKIADY   | 0,8037 |
| B27 | HLA-B*15:98 | 443  | SKVGGNYNY   | 0,9112 |
| B27 | HLA-B*15:98 | 456  | FRKSNLKPF   | 0,5235 |
| B27 | HLA-B*15:98 | 464  | FERDISTEY   | 0,635  |
| B27 | HLA-B*15:98 | 497  | FQPTNGVGY   | 0,8242 |
| B27 | HLA-B*15:98 | 557  | KKFLPFQQF   | 0,9568 |
| B27 | HLA-B*15:98 | 628  | QLTPTWRVY   | 0,5065 |
| B27 | HLA-B*15:98 | 634  | RVYSTGSNVF  | 0,7212 |
| B27 | HLA-B*15:98 | 687  | VASQSIIAY   | 0,7907 |
| B27 | HLA-B*15:98 | 689  | SQSIIAYTM   | 0,7655 |
| B27 | HLA-B*15:98 | 699  | LGAENSVAY   | 0,5647 |
| B27 | HLA-B*15:98 | 710  | NSIAIPTNF   | 0,5451 |
| B27 | HLA-B*15:98 | 789  | YKTPPIKDF   | 0,8036 |
| B27 | HLA-B*15:98 | 794  | IKDFGGFNF   | 0,7241 |
| B27 | HLA-B*15:98 | 815  | RSFIEDLLF   | 0,624  |
| B27 | HLA-B*15:98 | 852  | AQKFNGLTV   | 0,6121 |
| B27 | HLA-B*15:98 | 852  | AQKFNGLTVL  | 0,5743 |
| B27 | HLA-B*15:98 | 853  | QKFNGLTVL   | 0,7866 |
| B27 | HLA-B*15:98 | 880  | GTITSGWTF   | 0,5063 |

|     |             |      |              |        |
|-----|-------------|------|--------------|--------|
| B27 | HLA-B*15:98 | 893  | ALQIPFAMQM   | 0,5298 |
| B27 | HLA-B*15:98 | 894  | LQIPFAMQM    | 0,9192 |
| B27 | HLA-B*15:98 | 919  | NQKLIANQF    | 0,8596 |
| B27 | HLA-B*15:98 | 999  | GRLQSLQTY    | 0,8486 |
| B27 | HLA-B*15:98 | 1044 | GKGYHLMSF    | 0,7673 |
| B27 | HLA-B*15:98 | 1054 | QSAPHGVVF    | 0,8355 |
| B27 | HLA-B*15:98 | 1087 | AHFPREGVF    | 0,7921 |
| B27 | HLA-B*15:98 | 1113 | QIITDNTF     | 0,5046 |
| B27 | HLA-B*15:98 | 1130 | IGIVNNTVY    | 0,5224 |
| B27 | HLA-B*15:98 | 1264 | VLKGVKLHY    | 0,6224 |
| B27 | HLA-B*27:02 | 77   | KRFDNPVLPF   | 0,9936 |
| B27 | HLA-B*27:02 | 236  | TRFQTLAL     | 0,9672 |
| B27 | HLA-B*27:02 | 342  | FNATRFASVYAW | 0,5105 |
| B27 | HLA-B*27:02 | 343  | NATRFASVYAW  | 0,7021 |
| B27 | HLA-B*27:02 | 344  | ATRFASVYAW   | 0,9567 |
| B27 | HLA-B*27:02 | 345  | TRFASVYAW    | 0,9908 |
| B27 | HLA-B*27:02 | 356  | KRISNCVADY   | 0,7362 |
| B27 | HLA-B*27:02 | 814  | KRSFIEDLLF   | 0,9772 |
| B27 | HLA-B*27:02 | 846  | ARDLICAQKF   | 0,8438 |
| B27 | HLA-B*27:02 | 999  | GRLQSLQTY    | 0,9922 |
| B27 | HLA-B*27:03 | 77   | KRFDNPVLPF   | 0,9834 |
| B27 | HLA-B*27:03 | 814  | KRSFIEDLLF   | 0,8897 |
| B27 | HLA-B*27:04 | 77   | KRFDNPVLPF   | 0,986  |
| B27 | HLA-B*27:04 | 235  | ITRFQTLAL    | 0,5856 |
| B27 | HLA-B*27:04 | 236  | TRFQTLAL     | 0,9822 |
| B27 | HLA-B*27:04 | 327  | VRFPNITNL    | 0,9799 |
| B27 | HLA-B*27:04 | 453  | YRLFRKSNL    | 0,6317 |
| B27 | HLA-B*27:04 | 814  | KRSFIEDLLF   | 0,8383 |
| B27 | HLA-B*27:04 | 904  | YRFNGIGVT    | 0,6001 |
| B27 | HLA-B*27:04 | 999  | GRLQSLQTY    | 0,967  |
| B27 | HLA-B*27:05 | 77   | KRFDNPVLPF   | 0,9904 |
| B27 | HLA-B*27:05 | 101  | IRGWIFGTTL   | 0,6849 |
| B27 | HLA-B*27:05 | 235  | ITRFQTLAL    | 0,5227 |
| B27 | HLA-B*27:05 | 236  | TRFQTLAL     | 0,9782 |
| B27 | HLA-B*27:05 | 318  | FRVQPTESI    | 0,6722 |
| B27 | HLA-B*27:05 | 327  | VRFPNITNL    | 0,9818 |
| B27 | HLA-B*27:05 | 344  | ATRFASVYAW   | 0,7783 |
| B27 | HLA-B*27:05 | 345  | TRFASVYAW    | 0,9414 |
| B27 | HLA-B*27:05 | 356  | KRISNCVADY   | 0,6725 |
| B27 | HLA-B*27:05 | 453  | YRLFRKSNL    | 0,6377 |
| B27 | HLA-B*27:05 | 814  | KRSFIEDLL    | 0,8024 |
| B27 | HLA-B*27:05 | 814  | KRSFIEDLLF   | 0,9257 |
| B27 | HLA-B*27:05 | 846  | ARDLICAQKF   | 0,5398 |
| B27 | HLA-B*27:05 | 904  | YRFNGIGVTQ   | 0,7685 |
| B27 | HLA-B*27:05 | 999  | GRLQSLQTY    | 0,9825 |
| B27 | HLA-B*27:05 | 1038 | KRVDFCGKGY   | 0,8924 |
| B27 | HLA-B*27:05 | 1038 | KRVDFCGKGYHL | 0,663  |
| B27 | HLA-B*27:06 | 77   | KRFDNPVL     | 0,7543 |
| B27 | HLA-B*27:06 | 77   | KRFDNPVLPF   | 0,9867 |
| B27 | HLA-B*27:06 | 101  | IRGWIFGTTL   | 0,7577 |

|     |             |      |              |        |
|-----|-------------|------|--------------|--------|
| B27 | HLA-B*27:06 | 235  | ITRFQTLAL    | 0,6798 |
| B27 | HLA-B*27:06 | 236  | TRFQTLAL     | 0,9905 |
| B27 | HLA-B*27:06 | 318  | FRVQPTESI    | 0,887  |
| B27 | HLA-B*27:06 | 325  | SIVRFPNITNL  | 0,8466 |
| B27 | HLA-B*27:06 | 326  | IVRFPNITNL   | 0,8762 |
| B27 | HLA-B*27:06 | 327  | VRFPNITNL    | 0,9922 |
| B27 | HLA-B*27:06 | 453  | YRLFRKSNL    | 0,7499 |
| B27 | HLA-B*27:06 | 684  | ARSVASQSI    | 0,6368 |
| B27 | HLA-B*27:06 | 764  | NRALTGIIV    | 0,588  |
| B27 | HLA-B*27:06 | 814  | KRSFIEDLL    | 0,749  |
| B27 | HLA-B*27:06 | 814  | KRSFIEDLLF   | 0,6968 |
| B27 | HLA-B*27:06 | 853  | QKFNGLTVL    | 0,5745 |
| B27 | HLA-B*27:06 | 904  | YRFNGIGV     | 0,617  |
| B27 | HLA-B*27:06 | 904  | YRFNGIGVTQNV | 0,5027 |
| B27 | HLA-B*27:06 | 1038 | KRVDFCGKGYHL | 0,6164 |
| B27 | HLA-B*27:06 | 1106 | QRNFYEPQI    | 0,601  |
| B27 | HLA-B*27:07 | 77   | KRFDNPVL     | 0,7135 |
| B27 | HLA-B*27:07 | 77   | KRFDNPVLPF   | 0,9902 |
| B27 | HLA-B*27:07 | 101  | IRGWIFGTTL   | 0,8223 |
| B27 | HLA-B*27:07 | 235  | ITRFQTLAL    | 0,6211 |
| B27 | HLA-B*27:07 | 236  | TRFQTLAL     | 0,9877 |
| B27 | HLA-B*27:07 | 318  | FRVQPTESI    | 0,8291 |
| B27 | HLA-B*27:07 | 325  | SIVRFPNITNL  | 0,8921 |
| B27 | HLA-B*27:07 | 326  | IVRFPNITNL   | 0,8934 |
| B27 | HLA-B*27:07 | 327  | VRFPNITNL    | 0,9922 |
| B27 | HLA-B*27:07 | 327  | VRFPNITNLCPF | 0,7232 |
| B27 | HLA-B*27:07 | 344  | ATRFASVYAW   | 0,5458 |
| B27 | HLA-B*27:07 | 345  | TRFASVYAW    | 0,8735 |
| B27 | HLA-B*27:07 | 453  | YRLFRKSNL    | 0,6719 |
| B27 | HLA-B*27:07 | 557  | KKFLPFQQF    | 0,6105 |
| B27 | HLA-B*27:07 | 684  | ARSVASQSI    | 0,577  |
| B27 | HLA-B*27:07 | 764  | NRALTGIIV    | 0,5708 |
| B27 | HLA-B*27:07 | 814  | KRSFIEDLL    | 0,9203 |
| B27 | HLA-B*27:07 | 814  | KRSFIEDLLF   | 0,8818 |
| B27 | HLA-B*27:07 | 904  | YRFNGIGV     | 0,614  |
| B27 | HLA-B*27:07 | 904  | YRFNGIGVTQNV | 0,5884 |
| B27 | HLA-B*27:07 | 999  | GRLQSLQTYV   | 0,526  |
| B27 | HLA-B*27:07 | 1038 | KRVDFCGKGYHL | 0,8228 |
| B27 | HLA-B*27:07 | 1106 | QRNFYEPQI    | 0,7313 |
| B27 | HLA-B*27:09 | 77   | KRFDNPVL     | 0,7057 |
| B27 | HLA-B*27:09 | 77   | KRFDNPVLPF   | 0,9931 |
| B27 | HLA-B*27:09 | 101  | IRGWIFGTTL   | 0,8159 |
| B27 | HLA-B*27:09 | 235  | ITRFQTLAL    | 0,6732 |
| B27 | HLA-B*27:09 | 236  | TRFQTLAL     | 0,9861 |
| B27 | HLA-B*27:09 | 318  | FRVQPTESI    | 0,8298 |
| B27 | HLA-B*27:09 | 325  | SIVRFPNITNL  | 0,8994 |
| B27 | HLA-B*27:09 | 326  | IVRFPNITNL   | 0,9018 |
| B27 | HLA-B*27:09 | 327  | VRFPNITNL    | 0,9903 |
| B27 | HLA-B*27:09 | 327  | VRFPNITNLCPF | 0,7706 |
| B27 | HLA-B*27:09 | 344  | ATRFASVYAW   | 0,6784 |

|     |             |      |              |        |
|-----|-------------|------|--------------|--------|
| B27 | HLA-B*27:09 | 345  | TRFASVYAW    | 0,904  |
| B27 | HLA-B*27:09 | 453  | YRLFRKSNL    | 0,6207 |
| B27 | HLA-B*27:09 | 764  | NRALTGIIV    | 0,51   |
| B27 | HLA-B*27:09 | 814  | KRSFIEDLL    | 0,9093 |
| B27 | HLA-B*27:09 | 814  | KRSFIEDLLF   | 0,925  |
| B27 | HLA-B*27:09 | 846  | ARDLICAQKF   | 0,5004 |
| B27 | HLA-B*27:09 | 904  | YRFNGIGV     | 0,6307 |
| B27 | HLA-B*27:09 | 904  | YRFNGIGVT    | 0,5198 |
| B27 | HLA-B*27:09 | 904  | YRFNGIGVTQNV | 0,6738 |
| B27 | HLA-B*27:09 | 999  | GRLQSLQTYV   | 0,5888 |
| B27 | HLA-B*27:09 | 1038 | KRVDFCGKGYHL | 0,8281 |
| B27 | HLA-B*27:09 | 1106 | QRNFYEPQI    | 0,7026 |
| B27 | HLA-B*27:10 | 77   | KRFDNPVLPF   | 0,9542 |
| B27 | HLA-B*27:10 | 236  | TRFQTLAL     | 0,9226 |
| B27 | HLA-B*27:10 | 453  | YRLFRKSNL    | 0,5229 |
| B27 | HLA-B*27:13 | 77   | KRFDNPVLPF   | 0,9904 |
| B27 | HLA-B*27:13 | 101  | IRGWIFGTTL   | 0,6849 |
| B27 | HLA-B*27:13 | 235  | ITRFQTLAL    | 0,5227 |
| B27 | HLA-B*27:13 | 236  | TRFQTLAL     | 0,9782 |
| B27 | HLA-B*27:13 | 318  | FRVQPTESI    | 0,6722 |
| B27 | HLA-B*27:13 | 327  | VRFPNITNL    | 0,9818 |
| B27 | HLA-B*27:13 | 344  | ATRFASVYAW   | 0,7783 |
| B27 | HLA-B*27:13 | 345  | TRFASVYAW    | 0,9414 |
| B27 | HLA-B*27:13 | 356  | KRISNCVADY   | 0,6725 |
| B27 | HLA-B*27:13 | 453  | YRLFRKSNL    | 0,6377 |
| B27 | HLA-B*27:13 | 814  | KRSFIEDLL    | 0,8024 |
| B27 | HLA-B*27:13 | 814  | KRSFIEDLLF   | 0,9257 |
| B27 | HLA-B*27:13 | 846  | ARDLICAQKF   | 0,5398 |
| B27 | HLA-B*27:13 | 904  | YRFNGIGVTQ   | 0,7685 |
| B27 | HLA-B*27:13 | 999  | GRLQSLQTY    | 0,9825 |
| B27 | HLA-B*27:13 | 1038 | KRVDFCGKGY   | 0,8924 |
| B27 | HLA-B*27:13 | 1038 | KRVDFCGKGYHL | 0,663  |
| B27 | HLA-B*27:15 | 77   | KRFDNPVLPF   | 0,9827 |
| B27 | HLA-B*27:15 | 235  | ITRFQTLAL    | 0,5206 |
| B27 | HLA-B*27:15 | 236  | TRFQTLAL     | 0,9763 |
| B27 | HLA-B*27:15 | 327  | VRFPNITNL    | 0,9756 |
| B27 | HLA-B*27:15 | 453  | YRLFRKSNL    | 0,6738 |
| B27 | HLA-B*27:15 | 814  | KRSFIEDLLF   | 0,8178 |
| B27 | HLA-B*27:15 | 904  | YRFNGIGVT    | 0,6068 |
| B27 | HLA-B*27:15 | 999  | GRLQSLQTY    | 0,9613 |
| B27 | HLA-B*27:17 | 20   | TRTQLPPAY    | 0,9    |
| B27 | HLA-B*27:17 | 77   | KRFDNPVL     | 0,65   |
| B27 | HLA-B*27:17 | 77   | KRFDNPVLPF   | 0,9915 |
| B27 | HLA-B*27:17 | 101  | IRGWIFGTTL   | 0,7045 |
| B27 | HLA-B*27:17 | 235  | ITRFQTLAL    | 0,545  |
| B27 | HLA-B*27:17 | 236  | TRFQTLAL     | 0,9819 |
| B27 | HLA-B*27:17 | 318  | FRVQPTESI    | 0,7209 |
| B27 | HLA-B*27:17 | 325  | SIVRFPNITNL  | 0,8395 |
| B27 | HLA-B*27:17 | 326  | IVRFPNITNL   | 0,8595 |
| B27 | HLA-B*27:17 | 327  | VRFPNITNL    | 0,9862 |

|     |             |      |              |        |
|-----|-------------|------|--------------|--------|
| B27 | HLA-B*27:17 | 327  | VRFPNITNLCPF | 0,7682 |
| B27 | HLA-B*27:17 | 344  | ATRFASVYAW   | 0,782  |
| B27 | HLA-B*27:17 | 345  | TRFASVYAW    | 0,9514 |
| B27 | HLA-B*27:17 | 356  | KRISNCVADY   | 0,6994 |
| B27 | HLA-B*27:17 | 453  | YRLFRKSNL    | 0,6674 |
| B27 | HLA-B*27:17 | 508  | YRVVLSF      | 0,6075 |
| B27 | HLA-B*27:17 | 814  | KRSFIEDLL    | 0,8281 |
| B27 | HLA-B*27:17 | 814  | KRSFIEDLLF   | 0,9299 |
| B27 | HLA-B*27:17 | 846  | ARDLICAQKF   | 0,5844 |
| B27 | HLA-B*27:17 | 904  | YRFNGIGV     | 0,5341 |
| B27 | HLA-B*27:17 | 904  | YRFNGIGVT    | 0,5417 |
| B27 | HLA-B*27:17 | 904  | YRFNGIGVTQ   | 0,802  |
| B27 | HLA-B*27:17 | 998  | TGRLQSLQTY   | 0,6318 |
| B27 | HLA-B*27:17 | 999  | GRLQSLQTY    | 0,9859 |
| B27 | HLA-B*27:17 | 1038 | KRVDFCGKGY   | 0,9087 |
| B27 | HLA-B*27:17 | 1038 | KRVDFCGKGYHL | 0,6876 |
| B27 | HLA-B*27:17 | 1106 | QRNFYEPQI    | 0,5937 |
| B27 | HLA-B*27:25 | 77   | KRFDNPVLPF   | 0,8627 |
| B27 | HLA-B*27:25 | 236  | TRFQTLAL     | 0,8437 |
| B27 | HLA-B*27:28 | 77   | KRFDNPVLPF   | 0,9752 |
| B27 | HLA-B*27:28 | 101  | IRGWIFGTTL   | 0,6664 |
| B27 | HLA-B*27:28 | 236  | TRFQTLAL     | 0,9591 |
| B27 | HLA-B*27:28 | 327  | VRFPNITNL    | 0,961  |
| B27 | HLA-B*27:28 | 344  | ATRFASVYAW   | 0,754  |
| B27 | HLA-B*27:28 | 345  | TRFASVYAW    | 0,9368 |
| B27 | HLA-B*27:28 | 356  | KRISNCVADY   | 0,6169 |
| B27 | HLA-B*27:28 | 453  | YRLFRKSNL    | 0,6569 |
| B27 | HLA-B*27:28 | 508  | YRVVLSF      | 0,6768 |
| B27 | HLA-B*27:28 | 814  | KRSFIEDLLF   | 0,8481 |
| B27 | HLA-B*27:28 | 846  | ARDLICAQKF   | 0,5402 |
| B27 | HLA-B*27:28 | 904  | YRFNGIGV     | 0,5641 |
| B27 | HLA-B*27:28 | 904  | YRFNGIGVTQ   | 0,7159 |
| B27 | HLA-B*27:28 | 999  | GRLQSLQTY    | 0,9569 |
| B27 | HLA-B*27:28 | 1038 | KRVDFCGKGY   | 0,8473 |
| B27 | HLA-B*38:01 | 236  | TRFQTLAL     | 0,761  |
| B27 | HLA-B*38:05 | 236  | TRFQTLAL     | 0,761  |
| B27 | HLA-B*38:09 | 236  | TRFQTLAL     | 0,761  |
| B27 | HLA-B*38:11 | 236  | TRFQTLAL     | 0,761  |
| B27 | HLA-B*39:01 | 236  | TRFQTLAL     | 0,9488 |
| B27 | HLA-B*39:01 | 318  | FRVQPTESI    | 0,8358 |
| B27 | HLA-B*39:01 | 505  | YQPYRVVVL    | 0,5961 |
| B27 | HLA-B*39:01 | 576  | VRDPQTLEI    | 0,7426 |
| B27 | HLA-B*39:01 | 689  | SQSIIAYTM    | 0,557  |
| B27 | HLA-B*39:01 | 764  | NRALTGIIV    | 0,8592 |
| B27 | HLA-B*39:01 | 853  | QKFNGLTVL    | 0,7764 |
| B27 | HLA-B*39:01 | 1158 | NHTSPDVDL    | 0,7288 |
| B27 | HLA-B*39:02 | 168  | FEYVSQPFL    | 0,6813 |
| B27 | HLA-B*39:02 | 236  | TRFQTLAL     | 0,7521 |
| B27 | HLA-B*39:02 | 318  | FRVQPTESI    | 0,588  |
| B27 | HLA-B*39:02 | 464  | FERDISTEI    | 0,7304 |



|     |             |      |            |        |
|-----|-------------|------|------------|--------|
| B27 | HLA-B*39:02 | 505  | YQPYRVVVL  | 0,7112 |
| B27 | HLA-B*39:02 | 689  | SQSIIAYTM  | 0,6777 |
| B27 | HLA-B*39:02 | 852  | AQKFNGLTV  | 0,5032 |
| B27 | HLA-B*39:02 | 852  | AQKFNGLTVL | 0,6857 |
| B27 | HLA-B*39:02 | 853  | QKFNGLTVL  | 0,8116 |
| B27 | HLA-B*39:02 | 894  | LQIPFAMQM  | 0,6107 |
| B27 | HLA-B*39:02 | 1016 | AEIRASANL  | 0,7178 |
| B27 | HLA-B*39:02 | 1181 | KEIDRLNEV  | 0,7871 |
| B27 | HLA-B*39:04 | 236  | TRFQTLAL   | 0,9488 |
| B27 | HLA-B*39:04 | 318  | FRVQPTESI  | 0,8358 |
| B27 | HLA-B*39:04 | 505  | YQPYRVVVL  | 0,5961 |
| B27 | HLA-B*39:04 | 576  | VRDPQTLEI  | 0,7426 |
| B27 | HLA-B*39:04 | 689  | SQSIIAYTM  | 0,557  |
| B27 | HLA-B*39:04 | 764  | NRALTGIIV  | 0,8592 |
| B27 | HLA-B*39:04 | 853  | QKFNGLTVL  | 0,7764 |
| B27 | HLA-B*39:04 | 1158 | NHTSPDVDL  | 0,7288 |
| B27 | HLA-B*39:07 | 20   | TRTQLPPAY  | 0,7614 |
| B27 | HLA-B*39:07 | 236  | TRFQTLAL   | 0,7603 |
| B27 | HLA-B*39:07 | 345  | TRFASVYAW  | 0,7796 |
| B27 | HLA-B*39:07 | 465  | ERDISTEIV  | 0,6857 |
| B27 | HLA-B*39:07 | 689  | SQSIIAYTM  | 0,5704 |
| B27 | HLA-B*39:07 | 794  | IKDFGGFNF  | 0,5866 |
| B27 | HLA-B*39:07 | 853  | QKFNGLTVL  | 0,5625 |
| B27 | HLA-B*39:07 | 894  | LQIPFAMQM  | 0,5211 |
| B27 | HLA-B*39:07 | 1087 | AHFPREGVF  | 0,6804 |
| B27 | HLA-B*39:09 | 48   | LHSTQDLFL  | 0,5309 |
| B27 | HLA-B*39:09 | 236  | TRFQTLAL   | 0,9121 |
| B27 | HLA-B*39:09 | 269  | YLQPRTFLL  | 0,5194 |
| B27 | HLA-B*39:09 | 318  | FRVQPTESI  | 0,7813 |
| B27 | HLA-B*39:09 | 505  | YQPYRVVVL  | 0,812  |
| B27 | HLA-B*39:09 | 689  | SQSIIAYTM  | 0,6287 |
| B27 | HLA-B*39:09 | 764  | NRALTGIIV  | 0,7776 |
| B27 | HLA-B*39:09 | 853  | QKFNGLTVL  | 0,766  |
| B27 | HLA-B*39:09 | 1158 | NHTSPDVDL  | 0,7704 |
| B27 | HLA-B*39:14 | 236  | TRFQTLAL   | 0,9724 |
| B27 | HLA-B*39:14 | 318  | FRVQPTESI  | 0,8722 |
| B27 | HLA-B*39:14 | 327  | VRFPNITNL  | 0,9443 |
| B27 | HLA-B*39:14 | 453  | YRLFRRKSNL | 0,7017 |
| B27 | HLA-B*39:14 | 505  | YQPYRVVVL  | 0,7017 |
| B27 | HLA-B*39:14 | 576  | VRDPQTLEI  | 0,769  |
| B27 | HLA-B*39:14 | 689  | SQSIIAYTM  | 0,5743 |
| B27 | HLA-B*39:14 | 764  | NRALTGIIV  | 0,865  |
| B27 | HLA-B*39:14 | 853  | QKFNGLTVL  | 0,8612 |
| B27 | HLA-B*39:14 | 1158 | NHTSPDVDL  | 0,6977 |
| B27 | HLA-B*39:18 | 236  | TRFQTLAL   | 0,7919 |
| B27 | HLA-B*39:18 | 764  | NRALTGIIV  | 0,7027 |
| B27 | HLA-B*39:23 | 168  | FEYVSQPFL  | 0,6813 |
| B27 | HLA-B*39:23 | 236  | TRFQTLAL   | 0,7521 |
| B27 | HLA-B*39:23 | 318  | FRVQPTESI  | 0,588  |
| B27 | HLA-B*39:23 | 464  | FERDISTEIV | 0,7304 |

|     |             |      |             |        |
|-----|-------------|------|-------------|--------|
| B27 | HLA-B*39:23 | 505  | YQPYRVVVL   | 0,7112 |
| B27 | HLA-B*39:23 | 689  | SQSIIAYTM   | 0,6777 |
| B27 | HLA-B*39:23 | 852  | AQKFNGLTV   | 0,5032 |
| B27 | HLA-B*39:23 | 852  | AQKFNGLTVL  | 0,6857 |
| B27 | HLA-B*39:23 | 853  | QKFNGLTVL   | 0,8116 |
| B27 | HLA-B*39:23 | 894  | LQIPFAMQM   | 0,6107 |
| B27 | HLA-B*39:23 | 1016 | AEIRASANL   | 0,7178 |
| B27 | HLA-B*39:23 | 1181 | KEIDRLNEV   | 0,7871 |
| B27 | HLA-B*39:26 | 236  | TRFQTLAL    | 0,9488 |
| B27 | HLA-B*39:26 | 318  | FRVQPTESI   | 0,8358 |
| B27 | HLA-B*39:26 | 505  | YQPYRVVVL   | 0,5961 |
| B27 | HLA-B*39:26 | 576  | VRDPQTLEI   | 0,7426 |
| B27 | HLA-B*39:26 | 689  | SQSIIAYTM   | 0,557  |
| B27 | HLA-B*39:26 | 764  | NRALTGIIV   | 0,8592 |
| B27 | HLA-B*39:26 | 853  | QKFNGLTVL   | 0,7764 |
| B27 | HLA-B*39:26 | 1158 | NHTSPDVDL   | 0,7288 |
| B27 | HLA-B*39:27 | 236  | TRFQTLAL    | 0,9298 |
| B27 | HLA-B*39:27 | 318  | FRVQPTESI   | 0,7781 |
| B27 | HLA-B*39:27 | 327  | VRFPNITNL   | 0,8349 |
| B27 | HLA-B*39:27 | 505  | YQPYRVVVL   | 0,5535 |
| B27 | HLA-B*39:27 | 576  | VRDPQTLEI   | 0,726  |
| B27 | HLA-B*39:27 | 764  | NRALTGIIV   | 0,8242 |
| B27 | HLA-B*39:27 | 853  | QKFNGLTVL   | 0,6621 |
| B27 | HLA-B*39:27 | 1158 | NHTSPDVDL   | 0,5984 |
| B27 | HLA-B*39:29 | 236  | TRFQTLAL    | 0,9638 |
| B27 | HLA-B*39:29 | 318  | FRVQPTESI   | 0,8376 |
| B27 | HLA-B*39:29 | 327  | VRFPNITNL   | 0,9218 |
| B27 | HLA-B*39:29 | 453  | YRLFRKSNL   | 0,6499 |
| B27 | HLA-B*39:29 | 505  | YQPYRVVVL   | 0,5823 |
| B27 | HLA-B*39:29 | 764  | NRALTGIIV   | 0,8145 |
| B27 | HLA-B*39:29 | 853  | QKFNGLTVL   | 0,8131 |
| B27 | HLA-B*39:29 | 1158 | NHTSPDVDL   | 0,5748 |
| B27 | HLA-B*39:30 | 236  | TRFQTLAL    | 0,8953 |
| B27 | HLA-B*39:30 | 318  | FRVQPTESI   | 0,6956 |
| B27 | HLA-B*39:30 | 764  | NRALTGIIV   | 0,7463 |
| B27 | HLA-B*39:30 | 853  | QKFNGLTVL   | 0,6386 |
| B27 | HLA-B*39:30 | 1158 | NHTSPDVDL   | 0,6332 |
| B27 | HLA-B*39:32 | 236  | TRFQTLAL    | 0,8554 |
| B27 | HLA-B*39:32 | 505  | YQPYRVVVL   | 0,5179 |
| B27 | HLA-B*39:32 | 764  | NRALTGIIV   | 0,7295 |
| B27 | HLA-B*39:32 | 1158 | NHTSPDVDL   | 0,5368 |
| B27 | HLA-B*40:12 | 168  | FEYVSQPFL   | 0,5354 |
| B27 | HLA-B*40:12 | 689  | SQSIIAYTM   | 0,5826 |
| B27 | HLA-B*40:12 | 852  | AQKFNGLTVL  | 0,6787 |
| B27 | HLA-B*48:01 | 852  | AQKFNGLTVL  | 0,6838 |
| B27 | HLA-B*48:02 | 22   | TQLPPAYTNSF | 0,5241 |
| B27 | HLA-B*48:02 | 77   | KRFDPVLPF   | 0,5598 |
| B27 | HLA-B*48:02 | 339  | GEVFNATRF   | 0,7713 |
| B27 | HLA-B*48:02 | 345  | TRFASVYAW   | 0,5657 |
| B27 | HLA-B*48:02 | 369  | YNSASFSTF   | 0,5533 |

|     |             |      |            |        |
|-----|-------------|------|------------|--------|
| B27 | HLA-B*48:02 | 413  | GQTGKIADY  | 0,6026 |
| B27 | HLA-B*48:02 | 443  | SKVGGNYNY  | 0,8498 |
| B27 | HLA-B*48:02 | 464  | FERDISTEY  | 0,6629 |
| B27 | HLA-B*48:02 | 497  | FQPTNGVGY  | 0,6828 |
| B27 | HLA-B*48:02 | 557  | KKFLPFQQF  | 0,7916 |
| B27 | HLA-B*48:02 | 687  | VASQSIIAY  | 0,6788 |
| B27 | HLA-B*48:02 | 689  | SQSIIAYTM  | 0,6856 |
| B27 | HLA-B*48:02 | 789  | YKTPPIKDF  | 0,5888 |
| B27 | HLA-B*48:02 | 794  | IKDFGGFNF  | 0,6372 |
| B27 | HLA-B*48:02 | 853  | QKFNGLTVL  | 0,5314 |
| B27 | HLA-B*48:02 | 894  | LQIPFAMQM  | 0,7465 |
| B27 | HLA-B*48:02 | 919  | NQKLIANQF  | 0,7202 |
| B27 | HLA-B*48:02 | 999  | GRLQSLQTY  | 0,6453 |
| B27 | HLA-B*48:02 | 1054 | QSAPHGVVF  | 0,5772 |
| B27 | HLA-B*48:02 | 1087 | AHFPREGVF  | 0,5026 |
| B27 | HLA-B*48:02 | 1201 | QELGKYEYQ  | 0,6932 |
| B27 | HLA-B*48:03 | 168  | FEYVSQPFL  | 0,5354 |
| B27 | HLA-B*48:03 | 689  | SQSIIAYTM  | 0,5826 |
| B27 | HLA-B*48:03 | 852  | AQKFNGLTVL | 0,6787 |
| B27 | HLA-B*48:04 | 852  | AQKFNGLTVL | 0,6838 |
| B27 | HLA-B*48:05 | 852  | AQKFNGLTV  | 0,5272 |
| B27 | HLA-B*48:05 | 852  | AQKFNGLTVL | 0,5881 |
| B27 | HLA-B*48:09 | 852  | AQKFNGLTVL | 0,6838 |
| B27 | HLA-B*48:10 | 168  | FEYVSQPFL  | 0,5246 |
| B27 | HLA-B*48:10 | 852  | AQKFNGLTVL | 0,6418 |
| B27 | HLA-B*48:10 | 853  | QKFNGLTVL  | 0,614  |
| B27 | HLA-B*48:10 | 894  | LQIPFAMQM  | 0,5173 |
| B27 | HLA-B*48:12 | 168  | FEYVSQPFL  | 0,5246 |
| B27 | HLA-B*48:12 | 852  | AQKFNGLTVL | 0,6418 |
| B27 | HLA-B*48:12 | 853  | QKFNGLTVL  | 0,614  |
| B27 | HLA-B*48:12 | 894  | LQIPFAMQM  | 0,5173 |
| B27 | HLA-B*48:13 | 168  | FEYVSQPFL  | 0,5246 |
| B27 | HLA-B*48:13 | 852  | AQKFNGLTVL | 0,6418 |
| B27 | HLA-B*48:13 | 853  | QKFNGLTVL  | 0,614  |
| B27 | HLA-B*48:13 | 894  | LQIPFAMQM  | 0,5173 |
| B27 | HLA-B*73:01 | 236  | TRFQTLAL   | 0,8088 |
| B27 | HLA-B*73:01 | 764  | NRALTGIAY  | 0,6815 |
| B44 | HLA-B*15:53 | 153  | MESEFRVY   | 0,5616 |
| B44 | HLA-B*15:53 | 339  | GEVFNATRF  | 0,8089 |
| B44 | HLA-B*15:53 | 369  | YNSASFSTF  | 0,5654 |
| B44 | HLA-B*15:53 | 413  | GQTGKIADY  | 0,7749 |
| B44 | HLA-B*15:53 | 443  | SKVGGNYNY  | 0,7828 |
| B44 | HLA-B*15:53 | 464  | FERDISTEI  | 0,5031 |
| B44 | HLA-B*15:53 | 464  | FERDISTEY  | 0,8541 |
| B44 | HLA-B*15:53 | 497  | FQPTNGVGY  | 0,7516 |
| B44 | HLA-B*15:53 | 557  | KKFLPFQQF  | 0,6864 |
| B44 | HLA-B*15:53 | 634  | RVYSTGSNVF | 0,5726 |
| B44 | HLA-B*15:53 | 653  | AEHVNNSY   | 0,6845 |
| B44 | HLA-B*15:53 | 687  | VASQSIIAY  | 0,6214 |
| B44 | HLA-B*15:53 | 689  | SQSIIAYTM  | 0,6354 |

|     |             |      |            |        |
|-----|-------------|------|------------|--------|
| B44 | HLA-B*15:53 | 852  | AQKFNGLTV  | 0,5366 |
| B44 | HLA-B*15:53 | 852  | AQKFNGLTVL | 0,5324 |
| B44 | HLA-B*15:53 | 894  | LQIPFAMQM  | 0,7568 |
| B44 | HLA-B*15:53 | 919  | NQKLIANQF  | 0,8277 |
| B44 | HLA-B*15:53 | 1016 | AEIRASANL  | 0,5785 |
| B44 | HLA-B*15:53 | 1054 | QSAPHGVVF  | 0,6409 |
| B44 | HLA-B*15:53 | 1264 | VLKGVKLHY  | 0,583  |
| B44 | HLA-B*18:01 | 153  | MESEFRVY   | 0,8458 |
| B44 | HLA-B*18:01 | 168  | FEYVSQPF   | 0,5811 |
| B44 | HLA-B*18:01 | 464  | FERDISTEY  | 0,7821 |
| B44 | HLA-B*18:01 | 724  | TEILPVSM   | 0,6734 |
| B44 | HLA-B*18:01 | 1201 | QELGKYEY   | 0,8379 |
| B44 | HLA-B*18:03 | 153  | MESEFRVY   | 0,5628 |
| B44 | HLA-B*18:03 | 464  | FERDISTEI  | 0,5105 |
| B44 | HLA-B*18:03 | 464  | FERDISTEY  | 0,5603 |
| B44 | HLA-B*18:05 | 153  | MESEFRVY   | 0,8458 |
| B44 | HLA-B*18:05 | 168  | FEYVSQPF   | 0,5811 |
| B44 | HLA-B*18:05 | 464  | FERDISTEY  | 0,7821 |
| B44 | HLA-B*18:05 | 724  | TEILPVSM   | 0,6734 |
| B44 | HLA-B*18:05 | 1201 | QELGKYEY   | 0,8379 |
| B44 | HLA-B*18:06 | 153  | MESEFRVY   | 0,6821 |
| B44 | HLA-B*18:06 | 464  | FERDISTEY  | 0,5613 |
| B44 | HLA-B*18:10 | 153  | MESEFRVY   | 0,6833 |
| B44 | HLA-B*18:10 | 339  | GEVFNATRF  | 0,6957 |
| B44 | HLA-B*18:10 | 464  | FERDISTEY  | 0,7407 |
| B44 | HLA-B*18:10 | 724  | TEILPVSM   | 0,6043 |
| B44 | HLA-B*18:10 | 1201 | QELGKYEY   | 0,7825 |
| B44 | HLA-B*18:11 | 153  | MESEFRVY   | 0,7741 |
| B44 | HLA-B*18:11 | 339  | GEVFNATRF  | 0,7018 |
| B44 | HLA-B*18:11 | 464  | FERDISTEI  | 0,5685 |
| B44 | HLA-B*18:11 | 464  | FERDISTEY  | 0,799  |
| B44 | HLA-B*18:11 | 724  | TEILPVSM   | 0,6215 |
| B44 | HLA-B*18:11 | 1201 | QELGKYEY   | 0,834  |
| B44 | HLA-B*18:13 | 153  | MESEFRVY   | 0,8429 |
| B44 | HLA-B*18:13 | 168  | FEYVSQPF   | 0,5593 |
| B44 | HLA-B*18:13 | 388  | NDLCFTNVY  | 0,5383 |
| B44 | HLA-B*18:13 | 464  | FERDISTEY  | 0,7752 |
| B44 | HLA-B*18:13 | 1201 | QELGKYEY   | 0,7889 |
| B44 | HLA-B*18:13 | 1206 | YEQYIKWPW  | 0,5226 |
| B44 | HLA-B*18:15 | 153  | MESEFRVY   | 0,7703 |
| B44 | HLA-B*18:15 | 168  | FEYVSQPF   | 0,5051 |
| B44 | HLA-B*18:15 | 464  | FERDISTEY  | 0,7513 |
| B44 | HLA-B*18:15 | 896  | IPFAMQMAY  | 0,5009 |
| B44 | HLA-B*18:19 | 153  | MESEFRVY   | 0,6571 |
| B44 | HLA-B*18:19 | 464  | FERDISTEY  | 0,725  |
| B44 | HLA-B*18:20 | 153  | MESEFRVY   | 0,8458 |
| B44 | HLA-B*18:20 | 168  | FEYVSQPF   | 0,5811 |
| B44 | HLA-B*18:20 | 464  | FERDISTEY  | 0,7821 |
| B44 | HLA-B*18:20 | 724  | TEILPVSM   | 0,6734 |
| B44 | HLA-B*18:20 | 1201 | QELGKYEY   | 0,8379 |

|     |             |      |             |        |
|-----|-------------|------|-------------|--------|
| B44 | HLA-B*37:01 | 168  | FEYVSQPFL   | 0,6847 |
| B44 | HLA-B*37:01 | 1181 | KEIDRLNEV   | 0,8589 |
| B44 | HLA-B*37:04 | 168  | FEYVSQPFL   | 0,6712 |
| B44 | HLA-B*40:01 | 168  | FEYVSQPFL   | 0,9485 |
| B44 | HLA-B*40:01 | 168  | FEYVSQPFLM  | 0,5398 |
| B44 | HLA-B*40:01 | 339  | GEVFNATRF   | 0,8888 |
| B44 | HLA-B*40:01 | 464  | FERDISTEI   | 0,9094 |
| B44 | HLA-B*40:01 | 660  | YECDIPIGAGI | 0,5931 |
| B44 | HLA-B*40:01 | 818  | IEDLLFNKV   | 0,639  |
| B44 | HLA-B*40:01 | 987  | VEAEVQIDRL  | 0,8709 |
| B44 | HLA-B*40:01 | 989  | AEVQIDRLI   | 0,9071 |
| B44 | HLA-B*40:01 | 1016 | AEIRASANL   | 0,9748 |
| B44 | HLA-B*40:01 | 1181 | KEIDRLNEV   | 0,906  |
| B44 | HLA-B*40:01 | 1194 | NESLIDLQEL  | 0,5405 |
| B44 | HLA-B*40:01 | 1256 | FDEDDSEPVL  | 0,5944 |
| B44 | HLA-B*40:01 | 1261 | SEPVLKGVKL  | 0,736  |
| B44 | HLA-B*40:02 | 155  | SEFRVYSSA   | 0,652  |
| B44 | HLA-B*40:02 | 168  | FEYVSQPFL   | 0,8998 |
| B44 | HLA-B*40:02 | 190  | REFVFKNI    | 0,6104 |
| B44 | HLA-B*40:02 | 339  | GEVFNATRF   | 0,776  |
| B44 | HLA-B*40:02 | 464  | FERDISTEI   | 0,8995 |
| B44 | HLA-B*40:02 | 660  | YECDIPIGA   | 0,512  |
| B44 | HLA-B*40:02 | 724  | TEILPVSM    | 0,8512 |
| B44 | HLA-B*40:02 | 818  | IEDLLFNKV   | 0,6624 |
| B44 | HLA-B*40:02 | 987  | VEAEVQIDRL  | 0,7072 |
| B44 | HLA-B*40:02 | 989  | AEVQIDRL    | 0,7511 |
| B44 | HLA-B*40:02 | 989  | AEVQIDRLI   | 0,8417 |
| B44 | HLA-B*40:02 | 1016 | AEIRASANL   | 0,9365 |
| B44 | HLA-B*40:02 | 1181 | KEIDRLNEV   | 0,9443 |
| B44 | HLA-B*40:02 | 1261 | SEPVLKGVKL  | 0,654  |
| B44 | HLA-B*40:05 | 155  | SEFRVYSSA   | 0,5629 |
| B44 | HLA-B*40:05 | 168  | FEYVSQPFL   | 0,7104 |
| B44 | HLA-B*40:05 | 464  | FERDISTEI   | 0,8023 |
| B44 | HLA-B*40:05 | 1016 | AEIRASANL   | 0,8349 |
| B44 | HLA-B*40:05 | 1181 | KEIDRLNEV   | 0,879  |
| B44 | HLA-B*40:06 | 155  | SEFRVYSSA   | 0,7601 |
| B44 | HLA-B*40:06 | 168  | FEYVSQPFL   | 0,7587 |
| B44 | HLA-B*40:06 | 464  | FERDISTEI   | 0,7272 |
| B44 | HLA-B*40:06 | 618  | TEVPVAIHA   | 0,7591 |
| B44 | HLA-B*40:06 | 660  | YECDIPIGA   | 0,6484 |
| B44 | HLA-B*40:06 | 818  | IEDLLFNKV   | 0,6059 |
| B44 | HLA-B*40:06 | 1016 | AEIRASANL   | 0,6441 |
| B44 | HLA-B*40:06 | 1181 | KEIDRLNEV   | 0,765  |
| B44 | HLA-B*40:11 | 168  | FEYVSQPFL   | 0,905  |
| B44 | HLA-B*40:11 | 339  | GEVFNATRF   | 0,8092 |
| B44 | HLA-B*40:11 | 464  | FERDISTEI   | 0,8897 |
| B44 | HLA-B*40:11 | 618  | TEVPVAIHA   | 0,6448 |
| B44 | HLA-B*40:11 | 724  | TEILPVSM    | 0,7985 |
| B44 | HLA-B*40:11 | 818  | IEDLLFNKV   | 0,6927 |
| B44 | HLA-B*40:11 | 987  | VEAEVQIDRL  | 0,7437 |

|     |             |      |             |        |
|-----|-------------|------|-------------|--------|
| B44 | HLA-B*40:11 | 989  | AEVQIDRL    | 0,7049 |
| B44 | HLA-B*40:11 | 989  | AEVQIDRLI   | 0,8855 |
| B44 | HLA-B*40:11 | 1016 | AEIRASANL   | 0,9391 |
| B44 | HLA-B*40:11 | 1181 | KEIDRLNEV   | 0,9057 |
| B44 | HLA-B*40:11 | 1256 | FDEDDSEPVL  | 0,5382 |
| B44 | HLA-B*40:11 | 1261 | SEPVLKGVKL  | 0,6019 |
| B44 | HLA-B*40:14 | 168  | FEYVSQPFL   | 0,905  |
| B44 | HLA-B*40:14 | 339  | GEVFNATRF   | 0,8092 |
| B44 | HLA-B*40:14 | 464  | FERDISTEI   | 0,8897 |
| B44 | HLA-B*40:14 | 618  | TEVPVAIHA   | 0,6448 |
| B44 | HLA-B*40:14 | 724  | TEILPVSM    | 0,7985 |
| B44 | HLA-B*40:14 | 818  | IEDLLFNKV   | 0,6927 |
| B44 | HLA-B*40:14 | 987  | VEAEVQIDRL  | 0,7437 |
| B44 | HLA-B*40:14 | 989  | AEVQIDRL    | 0,7049 |
| B44 | HLA-B*40:14 | 989  | AEVQIDRLI   | 0,8855 |
| B44 | HLA-B*40:14 | 1016 | AEIRASANL   | 0,9391 |
| B44 | HLA-B*40:14 | 1181 | KEIDRLNEV   | 0,9057 |
| B44 | HLA-B*40:14 | 1256 | FDEDDSEPVL  | 0,5382 |
| B44 | HLA-B*40:14 | 1261 | SEPVLKGVKL  | 0,6019 |
| B44 | HLA-B*40:15 | 155  | SEFRVYSSA   | 0,5585 |
| B44 | HLA-B*40:15 | 168  | FEYVSQPFL   | 0,7239 |
| B44 | HLA-B*40:15 | 214  | RDLPQGFSAL  | 0,5122 |
| B44 | HLA-B*40:15 | 464  | FERDISTEI   | 0,8506 |
| B44 | HLA-B*40:15 | 1016 | AEIRASANL   | 0,8988 |
| B44 | HLA-B*40:15 | 1181 | KEIDRLNEV   | 0,8892 |
| B44 | HLA-B*40:16 | 155  | SEFRVYSSA   | 0,5585 |
| B44 | HLA-B*40:16 | 168  | FEYVSQPFL   | 0,7239 |
| B44 | HLA-B*40:16 | 214  | RDLPQGFSAL  | 0,5122 |
| B44 | HLA-B*40:16 | 464  | FERDISTEI   | 0,8506 |
| B44 | HLA-B*40:16 | 1016 | AEIRASANL   | 0,8988 |
| B44 | HLA-B*40:16 | 1181 | KEIDRLNEV   | 0,8892 |
| B44 | HLA-B*40:20 | 153  | MESEFRVY    | 0,5689 |
| B44 | HLA-B*40:20 | 168  | FEYVSQPFL   | 0,55   |
| B44 | HLA-B*40:20 | 190  | REFVFKNIDGY | 0,5832 |
| B44 | HLA-B*40:20 | 339  | GEVFNATRF   | 0,906  |
| B44 | HLA-B*40:20 | 464  | FERDISTEI   | 0,6148 |
| B44 | HLA-B*40:20 | 464  | FERDISTEY   | 0,806  |
| B44 | HLA-B*40:20 | 653  | AEHVNNSY    | 0,7263 |
| B44 | HLA-B*40:20 | 724  | TEILPVSM    | 0,5311 |
| B44 | HLA-B*40:20 | 989  | AEVQIDRLI   | 0,6133 |
| B44 | HLA-B*40:20 | 1016 | AEIRASANL   | 0,7146 |
| B44 | HLA-B*40:20 | 1181 | KEIDRLNEV   | 0,6384 |
| B44 | HLA-B*40:20 | 1201 | QELGKYEQY   | 0,8567 |
| B44 | HLA-B*40:26 | 155  | SEFRVYSSA   | 0,5119 |
| B44 | HLA-B*40:26 | 168  | FEYVSQPFL   | 0,7736 |
| B44 | HLA-B*40:26 | 339  | GEVFNATRF   | 0,7063 |
| B44 | HLA-B*40:26 | 464  | FERDISTEI   | 0,8764 |
| B44 | HLA-B*40:26 | 724  | TEILPVSM    | 0,6548 |
| B44 | HLA-B*40:26 | 989  | AEVQIDRLI   | 0,7297 |
| B44 | HLA-B*40:26 | 1016 | AEIRASANL   | 0,9027 |

|     |             |      |            |        |
|-----|-------------|------|------------|--------|
| B44 | HLA-B*40:26 | 1181 | KEIDRLNEV  | 0,9114 |
| B44 | HLA-B*40:29 | 155  | SEFRVYSSA  | 0,6037 |
| B44 | HLA-B*40:29 | 168  | FEYVSQPFL  | 0,838  |
| B44 | HLA-B*40:29 | 190  | REFVFKNI   | 0,5309 |
| B44 | HLA-B*40:29 | 339  | GEVFNATRF  | 0,7589 |
| B44 | HLA-B*40:29 | 464  | FERDISTEI  | 0,8407 |
| B44 | HLA-B*40:29 | 724  | TEILPVSM   | 0,764  |
| B44 | HLA-B*40:29 | 818  | IEDLLFNKV  | 0,5439 |
| B44 | HLA-B*40:29 | 987  | VEAEVQIDRL | 0,6192 |
| B44 | HLA-B*40:29 | 989  | AEVQIDRL   | 0,6685 |
| B44 | HLA-B*40:29 | 989  | AEVQIDRLI  | 0,7966 |
| B44 | HLA-B*40:29 | 1016 | AEIRASANL  | 0,9162 |
| B44 | HLA-B*40:29 | 1181 | KEIDRLNEV  | 0,9308 |
| B44 | HLA-B*40:29 | 1261 | SEPVLKGVKL | 0,5302 |
| B44 | HLA-B*40:35 | 155  | SEFRVYSSA  | 0,652  |
| B44 | HLA-B*40:35 | 168  | FEYVSQPFL  | 0,8998 |
| B44 | HLA-B*40:35 | 190  | REFVFKNI   | 0,6104 |
| B44 | HLA-B*40:35 | 339  | GEVFNATRF  | 0,776  |
| B44 | HLA-B*40:35 | 464  | FERDISTEI  | 0,8995 |
| B44 | HLA-B*40:35 | 660  | YECDPIGA   | 0,512  |
| B44 | HLA-B*40:35 | 724  | TEILPVSM   | 0,8512 |
| B44 | HLA-B*40:35 | 818  | IEDLLFNKV  | 0,6624 |
| B44 | HLA-B*40:35 | 987  | VEAEVQIDRL | 0,7072 |
| B44 | HLA-B*40:35 | 989  | AEVQIDRL   | 0,7511 |
| B44 | HLA-B*40:35 | 989  | AEVQIDRLI  | 0,8417 |
| B44 | HLA-B*40:35 | 1016 | AEIRASANL  | 0,9365 |
| B44 | HLA-B*40:35 | 1181 | KEIDRLNEV  | 0,9443 |
| B44 | HLA-B*40:35 | 1261 | SEPVLKGVKL | 0,654  |
| B44 | HLA-B*40:39 | 155  | SEFRVYSSA  | 0,667  |
| B44 | HLA-B*40:39 | 168  | FEYVSQPFL  | 0,8825 |
| B44 | HLA-B*40:39 | 190  | REFVFKNI   | 0,6464 |
| B44 | HLA-B*40:39 | 339  | GEVFNATRF  | 0,7646 |
| B44 | HLA-B*40:39 | 464  | FERDISTEI  | 0,911  |
| B44 | HLA-B*40:39 | 660  | YECDPIGA   | 0,5358 |
| B44 | HLA-B*40:39 | 724  | TEILPVSM   | 0,8562 |
| B44 | HLA-B*40:39 | 818  | IEDLLFNKV  | 0,6636 |
| B44 | HLA-B*40:39 | 987  | VEAEVQIDRL | 0,6426 |
| B44 | HLA-B*40:39 | 989  | AEVQIDRL   | 0,757  |
| B44 | HLA-B*40:39 | 989  | AEVQIDRLI  | 0,8286 |
| B44 | HLA-B*40:39 | 1016 | AEIRASANL  | 0,9217 |
| B44 | HLA-B*40:39 | 1181 | KEIDRLNEV  | 0,944  |
| B44 | HLA-B*40:39 | 1261 | SEPVLKGVKL | 0,621  |
| B44 | HLA-B*40:40 | 168  | FEYVSQPFL  | 0,7627 |
| B44 | HLA-B*40:40 | 464  | FERDISTEI  | 0,7123 |
| B44 | HLA-B*40:40 | 852  | AQKFNGLTVL | 0,5879 |
| B44 | HLA-B*40:40 | 1016 | AEIRASANL  | 0,7906 |
| B44 | HLA-B*40:40 | 1181 | KEIDRLNEV  | 0,8178 |
| B44 | HLA-B*40:49 | 168  | FEYVSQPFL  | 0,7985 |
| B44 | HLA-B*40:49 | 689  | SQSIIAYTM  | 0,587  |
| B44 | HLA-B*40:49 | 852  | AQKFNGLTVL | 0,6038 |

|     |             |      |            |        |
|-----|-------------|------|------------|--------|
| B44 | HLA-B*40:49 | 1016 | AEIRASANL  | 0,8824 |
| B44 | HLA-B*40:50 | 168  | FEYVSQPFL  | 0,7931 |
| B44 | HLA-B*40:50 | 464  | FERDISTEI  | 0,8322 |
| B44 | HLA-B*40:50 | 724  | TEILPVSM   | 0,5961 |
| B44 | HLA-B*40:50 | 989  | AEVQIDRLI  | 0,69   |
| B44 | HLA-B*40:50 | 1016 | AEIRASANL  | 0,8418 |
| B44 | HLA-B*40:50 | 1181 | KEIDRLNEV  | 0,9058 |
| B44 | HLA-B*40:53 | 155  | SEFRVYSSA  | 0,7601 |
| B44 | HLA-B*40:53 | 168  | FEYVSQPFL  | 0,7587 |
| B44 | HLA-B*40:53 | 464  | FERDISTEI  | 0,7272 |
| B44 | HLA-B*40:53 | 618  | TEVPVAIHA  | 0,7591 |
| B44 | HLA-B*40:53 | 660  | YECDPIGA   | 0,6484 |
| B44 | HLA-B*40:53 | 818  | IEDLLFNKV  | 0,6059 |
| B44 | HLA-B*40:53 | 1016 | AEIRASANL  | 0,6441 |
| B44 | HLA-B*40:53 | 1181 | KEIDRLNEV  | 0,765  |
| B44 | HLA-B*40:54 | 168  | FEYVSQPFL  | 0,9485 |
| B44 | HLA-B*40:54 | 168  | FEYVSQPFLM | 0,5398 |
| B44 | HLA-B*40:54 | 339  | GEVFNATRF  | 0,8888 |
| B44 | HLA-B*40:54 | 464  | FERDISTEI  | 0,9094 |
| B44 | HLA-B*40:54 | 660  | YECDPIGAGI | 0,5931 |
| B44 | HLA-B*40:54 | 818  | IEDLLFNKV  | 0,639  |
| B44 | HLA-B*40:54 | 987  | VEAEVQIDRL | 0,8709 |
| B44 | HLA-B*40:54 | 989  | AEVQIDRLI  | 0,9071 |
| B44 | HLA-B*40:54 | 1016 | AEIRASANL  | 0,9748 |
| B44 | HLA-B*40:54 | 1181 | KEIDRLNEV  | 0,906  |
| B44 | HLA-B*40:54 | 1194 | NESLIDLQEL | 0,5405 |
| B44 | HLA-B*40:54 | 1256 | FDEDDSEPVL | 0,5944 |
| B44 | HLA-B*40:54 | 1261 | SEPVKGVKL  | 0,736  |
| B44 | HLA-B*40:55 | 168  | FEYVSQPFL  | 0,9485 |
| B44 | HLA-B*40:55 | 168  | FEYVSQPFLM | 0,5398 |
| B44 | HLA-B*40:55 | 339  | GEVFNATRF  | 0,8888 |
| B44 | HLA-B*40:55 | 464  | FERDISTEI  | 0,9094 |
| B44 | HLA-B*40:55 | 660  | YECDPIGAGI | 0,5931 |
| B44 | HLA-B*40:55 | 818  | IEDLLFNKV  | 0,639  |
| B44 | HLA-B*40:55 | 987  | VEAEVQIDRL | 0,8709 |
| B44 | HLA-B*40:55 | 989  | AEVQIDRLI  | 0,9071 |
| B44 | HLA-B*40:55 | 1016 | AEIRASANL  | 0,9748 |
| B44 | HLA-B*40:55 | 1181 | KEIDRLNEV  | 0,906  |
| B44 | HLA-B*40:55 | 1194 | NESLIDLQEL | 0,5405 |
| B44 | HLA-B*40:55 | 1256 | FDEDDSEPVL | 0,5944 |
| B44 | HLA-B*40:55 | 1261 | SEPVKGVKL  | 0,736  |
| B44 | HLA-B*40:56 | 155  | SEFRVYSSA  | 0,652  |
| B44 | HLA-B*40:56 | 168  | FEYVSQPFL  | 0,8998 |
| B44 | HLA-B*40:56 | 190  | REFVFKNI   | 0,6104 |
| B44 | HLA-B*40:56 | 339  | GEVFNATRF  | 0,776  |
| B44 | HLA-B*40:56 | 464  | FERDISTEI  | 0,8995 |
| B44 | HLA-B*40:56 | 660  | YECDPIGA   | 0,512  |
| B44 | HLA-B*40:56 | 724  | TEILPVSM   | 0,8512 |
| B44 | HLA-B*40:56 | 818  | IEDLLFNKV  | 0,6624 |
| B44 | HLA-B*40:56 | 987  | VEAEVQIDRL | 0,7072 |



|     |             |      |             |        |
|-----|-------------|------|-------------|--------|
| B44 | HLA-B*40:56 | 989  | AEVQIDRL    | 0,7511 |
| B44 | HLA-B*40:56 | 989  | AEVQIDRLI   | 0,8417 |
| B44 | HLA-B*40:56 | 1016 | AEIRASANL   | 0,9365 |
| B44 | HLA-B*40:56 | 1181 | KEIDRLNEV   | 0,9443 |
| B44 | HLA-B*40:56 | 1261 | SEPVKGVKL   | 0,654  |
| B44 | HLA-B*40:57 | 155  | SEFRVYSSA   | 0,652  |
| B44 | HLA-B*40:57 | 168  | FEYVSQPFL   | 0,8998 |
| B44 | HLA-B*40:57 | 190  | REFVFKNI    | 0,6104 |
| B44 | HLA-B*40:57 | 339  | GEVFNATRF   | 0,776  |
| B44 | HLA-B*40:57 | 464  | FERDISTEI   | 0,8995 |
| B44 | HLA-B*40:57 | 660  | YECDIPIGA   | 0,512  |
| B44 | HLA-B*40:57 | 724  | TEILPVSM    | 0,8512 |
| B44 | HLA-B*40:57 | 818  | IEDLLFNKV   | 0,6624 |
| B44 | HLA-B*40:57 | 987  | VEAEVQIDRL  | 0,7072 |
| B44 | HLA-B*40:57 | 989  | AEVQIDRL    | 0,7511 |
| B44 | HLA-B*40:57 | 989  | AEVQIDRLI   | 0,8417 |
| B44 | HLA-B*40:57 | 1016 | AEIRASANL   | 0,9365 |
| B44 | HLA-B*40:57 | 1181 | KEIDRLNEV   | 0,9443 |
| B44 | HLA-B*40:57 | 1261 | SEPVKGVKL   | 0,654  |
| B44 | HLA-B*41:02 | 155  | SEFRVYSSA   | 0,6407 |
| B44 | HLA-B*41:02 | 168  | FEYVSQPFL   | 0,8406 |
| B44 | HLA-B*41:02 | 190  | REFVFKNI    | 0,6992 |
| B44 | HLA-B*41:02 | 339  | GEVFNATRF   | 0,7419 |
| B44 | HLA-B*41:02 | 464  | FERDISTEI   | 0,9149 |
| B44 | HLA-B*41:02 | 724  | TEILPVSM    | 0,8338 |
| B44 | HLA-B*41:02 | 818  | IEDLLFNKV   | 0,7103 |
| B44 | HLA-B*41:02 | 987  | VEAEVQIDRL  | 0,6717 |
| B44 | HLA-B*41:02 | 989  | AEVQIDRL    | 0,7643 |
| B44 | HLA-B*41:02 | 989  | AEVQIDRLI   | 0,847  |
| B44 | HLA-B*41:02 | 1016 | AEIRASANL   | 0,9273 |
| B44 | HLA-B*41:02 | 1181 | KEIDRLNEV   | 0,9555 |
| B44 | HLA-B*41:02 | 1261 | SEPVKGVKL   | 0,7634 |
| B44 | HLA-B*41:03 | 168  | FEYVSQPFL   | 0,8113 |
| B44 | HLA-B*41:03 | 339  | GEVFNATRF   | 0,7437 |
| B44 | HLA-B*41:03 | 464  | FERDISTEI   | 0,8985 |
| B44 | HLA-B*41:03 | 724  | TEILPVSM    | 0,7399 |
| B44 | HLA-B*41:03 | 818  | IEDLLFNKV   | 0,706  |
| B44 | HLA-B*41:03 | 987  | VEAEVQIDRL  | 0,6522 |
| B44 | HLA-B*41:03 | 989  | AEVQIDRL    | 0,6693 |
| B44 | HLA-B*41:03 | 989  | AEVQIDRLI   | 0,8767 |
| B44 | HLA-B*41:03 | 1016 | AEIRASANL   | 0,9094 |
| B44 | HLA-B*41:03 | 1181 | KEIDRLNEV   | 0,9207 |
| B44 | HLA-B*41:03 | 1261 | SEPVKGVKL   | 0,6936 |
| B44 | HLA-B*44:02 | 95   | TEKSNIIRGW  | 0,9813 |
| B44 | HLA-B*44:02 | 153  | MESEFRVY    | 0,5131 |
| B44 | HLA-B*44:02 | 297  | SETKCTLKSF  | 0,7692 |
| B44 | HLA-B*44:02 | 339  | GEVFNATRF   | 0,8968 |
| B44 | HLA-B*44:02 | 779  | QEVFAQVKQIY | 0,7113 |
| B44 | HLA-B*44:02 | 989  | AEVQIDRLI   | 0,9059 |
| B44 | HLA-B*44:02 | 1016 | AEIRASANL   | 0,8002 |

|     |             |      |              |        |
|-----|-------------|------|--------------|--------|
| B44 | HLA-B*44:02 | 1091 | REGVFSNGTHW  | 0,792  |
| B44 | HLA-B*44:02 | 1201 | QELGKYEQY    | 0,9415 |
| B44 | HLA-B*44:02 | 1201 | QELGKYEQYIKW | 0,7097 |
| B44 | HLA-B*44:02 | 1206 | YEQYIKWPW    | 0,7519 |
| B44 | HLA-B*44:03 | 95   | TEKSNIIRGW   | 0,9553 |
| B44 | HLA-B*44:03 | 153  | MESEFRVY     | 0,5502 |
| B44 | HLA-B*44:03 | 297  | SETKCTLKSF   | 0,7221 |
| B44 | HLA-B*44:03 | 339  | GEVFNATRF    | 0,9332 |
| B44 | HLA-B*44:03 | 747  | TECSNLLLQY   | 0,6025 |
| B44 | HLA-B*44:03 | 779  | QEVFAQVKQIY  | 0,7054 |
| B44 | HLA-B*44:03 | 989  | AEVQIDRLI    | 0,922  |
| B44 | HLA-B*44:03 | 1016 | AEIRASANL    | 0,8443 |
| B44 | HLA-B*44:03 | 1091 | REGVFSNGTHW  | 0,7134 |
| B44 | HLA-B*44:03 | 1201 | QELGKYEQY    | 0,9687 |
| B44 | HLA-B*44:03 | 1201 | QELGKYEQYIKW | 0,6195 |
| B44 | HLA-B*44:03 | 1206 | YEQYIKWPW    | 0,671  |
| B44 | HLA-B*44:04 | 95   | TEKSNIIRGW   | 0,9072 |
| B44 | HLA-B*44:04 | 297  | SETKCTLKSF   | 0,6094 |
| B44 | HLA-B*44:04 | 339  | GEVFNATRF    | 0,8061 |
| B44 | HLA-B*44:04 | 747  | TECSNLLLQY   | 0,5668 |
| B44 | HLA-B*44:04 | 989  | AEVQIDRLI    | 0,7773 |
| B44 | HLA-B*44:04 | 1016 | AEIRASANL    | 0,6706 |
| B44 | HLA-B*44:04 | 1091 | REGVFSNGTHW  | 0,6043 |
| B44 | HLA-B*44:04 | 1201 | QELGKYEQY    | 0,8836 |
| B44 | HLA-B*44:04 | 1206 | YEQYIKWPW    | 0,6802 |
| B44 | HLA-B*44:07 | 95   | TEKSNIIRGW   | 0,9553 |
| B44 | HLA-B*44:07 | 153  | MESEFRVY     | 0,5502 |
| B44 | HLA-B*44:07 | 297  | SETKCTLKSF   | 0,7221 |
| B44 | HLA-B*44:07 | 339  | GEVFNATRF    | 0,9332 |
| B44 | HLA-B*44:07 | 747  | TECSNLLLQY   | 0,6025 |
| B44 | HLA-B*44:07 | 779  | QEVFAQVKQIY  | 0,7054 |
| B44 | HLA-B*44:07 | 989  | AEVQIDRLI    | 0,922  |
| B44 | HLA-B*44:07 | 1016 | AEIRASANL    | 0,8443 |
| B44 | HLA-B*44:07 | 1091 | REGVFSNGTHW  | 0,7134 |
| B44 | HLA-B*44:07 | 1201 | QELGKYEQY    | 0,9687 |
| B44 | HLA-B*44:07 | 1201 | QELGKYEQYIKW | 0,6195 |
| B44 | HLA-B*44:07 | 1206 | YEQYIKWPW    | 0,671  |
| B44 | HLA-B*44:13 | 95   | TEKSNIIRGW   | 0,9553 |
| B44 | HLA-B*44:13 | 153  | MESEFRVY     | 0,5502 |
| B44 | HLA-B*44:13 | 297  | SETKCTLKSF   | 0,7221 |
| B44 | HLA-B*44:13 | 339  | GEVFNATRF    | 0,9332 |
| B44 | HLA-B*44:13 | 747  | TECSNLLLQY   | 0,6025 |
| B44 | HLA-B*44:13 | 779  | QEVFAQVKQIY  | 0,7054 |
| B44 | HLA-B*44:13 | 989  | AEVQIDRLI    | 0,922  |
| B44 | HLA-B*44:13 | 1016 | AEIRASANL    | 0,8443 |
| B44 | HLA-B*44:13 | 1091 | REGVFSNGTHW  | 0,7134 |
| B44 | HLA-B*44:13 | 1201 | QELGKYEQY    | 0,9687 |
| B44 | HLA-B*44:13 | 1201 | QELGKYEQYIKW | 0,6195 |
| B44 | HLA-B*44:13 | 1206 | YEQYIKWPW    | 0,671  |
| B44 | HLA-B*44:16 | 95   | TEKSNIIRGW   | 0,8679 |

|     |             |      |               |        |
|-----|-------------|------|---------------|--------|
| B44 | HLA-B*44:16 | 153  | MESEFRVY      | 0,5269 |
| B44 | HLA-B*44:16 | 190  | REFVFKNIDGY   | 0,5278 |
| B44 | HLA-B*44:16 | 297  | SETKCTLKSF    | 0,5822 |
| B44 | HLA-B*44:16 | 339  | GEVFNATRF     | 0,8995 |
| B44 | HLA-B*44:16 | 464  | FERDISTEYI    | 0,6219 |
| B44 | HLA-B*44:16 | 653  | AEHVNNSY      | 0,6553 |
| B44 | HLA-B*44:16 | 747  | TECSNLLLQY    | 0,5015 |
| B44 | HLA-B*44:16 | 779  | QEVFAQVKQIY   | 0,5029 |
| B44 | HLA-B*44:16 | 829  | ADAGFIKQY     | 0,8245 |
| B44 | HLA-B*44:16 | 917  | YENQKLIANQF   | 0,5047 |
| B44 | HLA-B*44:16 | 989  | AEVQIDRLI     | 0,7927 |
| B44 | HLA-B*44:16 | 1016 | AEIRASANL     | 0,745  |
| B44 | HLA-B*44:16 | 1091 | REGVFVSNNGTHW | 0,7416 |
| B44 | HLA-B*44:16 | 1181 | KEIDRLNEV     | 0,6515 |
| B44 | HLA-B*44:16 | 1201 | QELGKYEQY     | 0,8678 |
| B44 | HLA-B*44:16 | 1201 | QELGKYEQYIKW  | 0,5106 |
| B44 | HLA-B*44:16 | 1206 | YEQYIKWPW     | 0,6551 |
| B44 | HLA-B*44:21 | 95   | TEKSNIIRGW    | 0,94   |
| B44 | HLA-B*44:21 | 297  | SETKCTLKSF    | 0,6607 |
| B44 | HLA-B*44:21 | 339  | GEVFNATRF     | 0,8236 |
| B44 | HLA-B*44:21 | 989  | AEVQIDRLI     | 0,8099 |
| B44 | HLA-B*44:21 | 1016 | AEIRASANL     | 0,6996 |
| B44 | HLA-B*44:21 | 1091 | REGVFVSNNGTHW | 0,682  |
| B44 | HLA-B*44:21 | 1201 | QELGKYEQY     | 0,8862 |
| B44 | HLA-B*44:21 | 1201 | QELGKYEQYIKW  | 0,6123 |
| B44 | HLA-B*44:21 | 1206 | YEQYIKWPW     | 0,6936 |
| B44 | HLA-B*44:22 | 95   | TEKSNIIRGW    | 0,9813 |
| B44 | HLA-B*44:22 | 153  | MESEFRVY      | 0,5131 |
| B44 | HLA-B*44:22 | 297  | SETKCTLKSF    | 0,7692 |
| B44 | HLA-B*44:22 | 339  | GEVFNATRF     | 0,8968 |
| B44 | HLA-B*44:22 | 779  | QEVFAQVKQIY   | 0,7113 |
| B44 | HLA-B*44:22 | 989  | AEVQIDRLI     | 0,9059 |
| B44 | HLA-B*44:22 | 1016 | AEIRASANL     | 0,8002 |
| B44 | HLA-B*44:22 | 1091 | REGVFVSNNGTHW | 0,792  |
| B44 | HLA-B*44:22 | 1201 | QELGKYEQY     | 0,9415 |
| B44 | HLA-B*44:22 | 1201 | QELGKYEQYIKW  | 0,7097 |
| B44 | HLA-B*44:22 | 1206 | YEQYIKWPW     | 0,7519 |
| B44 | HLA-B*44:24 | 95   | TEKSNIIRGW    | 0,9813 |
| B44 | HLA-B*44:24 | 153  | MESEFRVY      | 0,5131 |
| B44 | HLA-B*44:24 | 297  | SETKCTLKSF    | 0,7692 |
| B44 | HLA-B*44:24 | 339  | GEVFNATRF     | 0,8968 |
| B44 | HLA-B*44:24 | 779  | QEVFAQVKQIY   | 0,7113 |
| B44 | HLA-B*44:24 | 989  | AEVQIDRLI     | 0,9059 |
| B44 | HLA-B*44:24 | 1016 | AEIRASANL     | 0,8002 |
| B44 | HLA-B*44:24 | 1091 | REGVFVSNNGTHW | 0,792  |
| B44 | HLA-B*44:24 | 1201 | QELGKYEQY     | 0,9415 |
| B44 | HLA-B*44:24 | 1201 | QELGKYEQYIKW  | 0,7097 |
| B44 | HLA-B*44:24 | 1206 | YEQYIKWPW     | 0,7519 |
| B44 | HLA-B*44:26 | 95   | TEKSNIIRGW    | 0,9553 |
| B44 | HLA-B*44:26 | 153  | MESEFRVY      | 0,5502 |

|     |             |      |               |        |
|-----|-------------|------|---------------|--------|
| B44 | HLA-B*44:26 | 297  | SETKCTLKSF    | 0,7221 |
| B44 | HLA-B*44:26 | 339  | GEVFNATRF     | 0,9332 |
| B44 | HLA-B*44:26 | 747  | TECSNLLLQY    | 0,6025 |
| B44 | HLA-B*44:26 | 779  | QEVFAQVKQIY   | 0,7054 |
| B44 | HLA-B*44:26 | 989  | AEVQIDRLI     | 0,922  |
| B44 | HLA-B*44:26 | 1016 | AEIRASANL     | 0,8443 |
| B44 | HLA-B*44:26 | 1091 | REGVFVSNNGTHW | 0,7134 |
| B44 | HLA-B*44:26 | 1201 | QELGKYEQY     | 0,9687 |
| B44 | HLA-B*44:26 | 1201 | QELGKYEQYIKW  | 0,6195 |
| B44 | HLA-B*44:26 | 1206 | YEQYIKWPW     | 0,671  |
| B44 | HLA-B*44:27 | 95   | TEKSNIIRGW    | 0,9813 |
| B44 | HLA-B*44:27 | 153  | MESEFRVY      | 0,5131 |
| B44 | HLA-B*44:27 | 297  | SETKCTLKSF    | 0,7692 |
| B44 | HLA-B*44:27 | 339  | GEVFNATRF     | 0,8968 |
| B44 | HLA-B*44:27 | 779  | QEVFAQVKQIY   | 0,7113 |
| B44 | HLA-B*44:27 | 989  | AEVQIDRLI     | 0,9059 |
| B44 | HLA-B*44:27 | 1016 | AEIRASANL     | 0,8002 |
| B44 | HLA-B*44:27 | 1091 | REGVFVSNNGTHW | 0,792  |
| B44 | HLA-B*44:27 | 1201 | QELGKYEQY     | 0,9415 |
| B44 | HLA-B*44:27 | 1201 | QELGKYEQYIKW  | 0,7097 |
| B44 | HLA-B*44:27 | 1206 | YEQYIKWPW     | 0,7519 |
| B44 | HLA-B*44:28 | 95   | TEKSNIIRGW    | 0,9464 |
| B44 | HLA-B*44:28 | 297  | SETKCTLKSF    | 0,6716 |
| B44 | HLA-B*44:28 | 339  | GEVFNATRF     | 0,8558 |
| B44 | HLA-B*44:28 | 747  | TECSNLLLQY    | 0,5764 |
| B44 | HLA-B*44:28 | 989  | AEVQIDRLI     | 0,8322 |
| B44 | HLA-B*44:28 | 1016 | AEIRASANL     | 0,7302 |
| B44 | HLA-B*44:28 | 1091 | REGVFVSNNGTHW | 0,6683 |
| B44 | HLA-B*44:28 | 1201 | QELGKYEQY     | 0,92   |
| B44 | HLA-B*44:28 | 1201 | QELGKYEQYIKW  | 0,5544 |
| B44 | HLA-B*44:28 | 1206 | YEQYIKWPW     | 0,7125 |
| B44 | HLA-B*44:29 | 95   | TEKSNIIRGW    | 0,9629 |
| B44 | HLA-B*44:29 | 153  | MESEFRVY      | 0,6747 |
| B44 | HLA-B*44:29 | 190  | REFVFKNIDGY   | 0,5841 |
| B44 | HLA-B*44:29 | 297  | SETKCTLKSF    | 0,8275 |
| B44 | HLA-B*44:29 | 339  | GEVFNATRF     | 0,9564 |
| B44 | HLA-B*44:29 | 464  | FERDISTEYI    | 0,7133 |
| B44 | HLA-B*44:29 | 653  | AEHVNNSY      | 0,8118 |
| B44 | HLA-B*44:29 | 747  | TECSNLLLQY    | 0,7163 |
| B44 | HLA-B*44:29 | 779  | QEVFAQVKQIY   | 0,8073 |
| B44 | HLA-B*44:29 | 829  | ADAGFIKQY     | 0,8988 |
| B44 | HLA-B*44:29 | 917  | YENQKLIANQF   | 0,5716 |
| B44 | HLA-B*44:29 | 989  | AEVQIDRLI     | 0,9447 |
| B44 | HLA-B*44:29 | 1016 | AEIRASANL     | 0,8969 |
| B44 | HLA-B*44:29 | 1091 | REGVFVSNNGTHW | 0,8063 |
| B44 | HLA-B*44:29 | 1201 | QELGKYEQY     | 0,9796 |
| B44 | HLA-B*44:29 | 1201 | QELGKYEQYIKW  | 0,6973 |
| B44 | HLA-B*44:29 | 1206 | YEQYIKWPW     | 0,7407 |
| B44 | HLA-B*44:30 | 95   | TEKSNIIRGW    | 0,9553 |
| B44 | HLA-B*44:30 | 153  | MESEFRVY      | 0,5502 |

|     |             |      |               |        |
|-----|-------------|------|---------------|--------|
| B44 | HLA-B*44:30 | 297  | SETKCTLKSF    | 0,7221 |
| B44 | HLA-B*44:30 | 339  | GEVFNATRF     | 0,9332 |
| B44 | HLA-B*44:30 | 747  | TECSNLLLQY    | 0,6025 |
| B44 | HLA-B*44:30 | 779  | QEVFAQVKQIY   | 0,7054 |
| B44 | HLA-B*44:30 | 989  | AEVQIDRLI     | 0,922  |
| B44 | HLA-B*44:30 | 1016 | AEIRASANL     | 0,8443 |
| B44 | HLA-B*44:30 | 1091 | REGVFVSNNGTHW | 0,7134 |
| B44 | HLA-B*44:30 | 1201 | QELGKYEQY     | 0,9687 |
| B44 | HLA-B*44:30 | 1201 | QELGKYEQYIKW  | 0,6195 |
| B44 | HLA-B*44:30 | 1206 | YEQYIKWPW     | 0,671  |
| B44 | HLA-B*44:32 | 95   | TEKSNIIRGW    | 0,938  |
| B44 | HLA-B*44:32 | 297  | SETKCTLKSF    | 0,6498 |
| B44 | HLA-B*44:32 | 339  | GEVFNATRF     | 0,8844 |
| B44 | HLA-B*44:32 | 747  | TECSNLLLQY    | 0,513  |
| B44 | HLA-B*44:32 | 779  | QEVFAQVKQIY   | 0,6238 |
| B44 | HLA-B*44:32 | 989  | AEVQIDRLI     | 0,8801 |
| B44 | HLA-B*44:32 | 1016 | AEIRASANL     | 0,796  |
| B44 | HLA-B*44:32 | 1091 | REGVFVSNNGTHW | 0,7563 |
| B44 | HLA-B*44:32 | 1201 | QELGKYEQY     | 0,9492 |
| B44 | HLA-B*44:32 | 1201 | QELGKYEQYIKW  | 0,5458 |
| B44 | HLA-B*44:32 | 1206 | YEQYIKWPW     | 0,6216 |
| B44 | HLA-B*44:33 | 95   | TEKSNIIRGW    | 0,9813 |
| B44 | HLA-B*44:33 | 153  | MESEFRVY      | 0,5131 |
| B44 | HLA-B*44:33 | 297  | SETKCTLKSF    | 0,7692 |
| B44 | HLA-B*44:33 | 339  | GEVFNATRF     | 0,8968 |
| B44 | HLA-B*44:33 | 779  | QEVFAQVKQIY   | 0,7113 |
| B44 | HLA-B*44:33 | 989  | AEVQIDRLI     | 0,9059 |
| B44 | HLA-B*44:33 | 1016 | AEIRASANL     | 0,8002 |
| B44 | HLA-B*44:33 | 1091 | REGVFVSNNGTHW | 0,792  |
| B44 | HLA-B*44:33 | 1201 | QELGKYEQY     | 0,9415 |
| B44 | HLA-B*44:33 | 1201 | QELGKYEQYIKW  | 0,7097 |
| B44 | HLA-B*44:33 | 1206 | YEQYIKWPW     | 0,7519 |
| B44 | HLA-B*44:35 | 95   | TEKSNIIRGW    | 0,975  |
| B44 | HLA-B*44:35 | 153  | MESEFRVY      | 0,5617 |
| B44 | HLA-B*44:35 | 297  | SETKCTLKSF    | 0,7874 |
| B44 | HLA-B*44:35 | 339  | GEVFNATRF     | 0,9155 |
| B44 | HLA-B*44:35 | 747  | TECSNLLLQY    | 0,5932 |
| B44 | HLA-B*44:35 | 779  | QEVFAQVKQIY   | 0,7582 |
| B44 | HLA-B*44:35 | 989  | AEVQIDRLI     | 0,9053 |
| B44 | HLA-B*44:35 | 1016 | AEIRASANL     | 0,8196 |
| B44 | HLA-B*44:35 | 1091 | REGVFVSNNGTHW | 0,782  |
| B44 | HLA-B*44:35 | 1201 | QELGKYEQY     | 0,9534 |
| B44 | HLA-B*44:35 | 1201 | QELGKYEQYIKW  | 0,6824 |
| B44 | HLA-B*44:35 | 1206 | YEQYIKWPW     | 0,7492 |
| B44 | HLA-B*44:36 | 95   | TEKSNIIRGW    | 0,9553 |
| B44 | HLA-B*44:36 | 153  | MESEFRVY      | 0,5502 |
| B44 | HLA-B*44:36 | 297  | SETKCTLKSF    | 0,7221 |
| B44 | HLA-B*44:36 | 339  | GEVFNATRF     | 0,9332 |
| B44 | HLA-B*44:36 | 747  | TECSNLLLQY    | 0,6025 |
| B44 | HLA-B*44:36 | 779  | QEVFAQVKQIY   | 0,7054 |

|     |             |      |               |        |
|-----|-------------|------|---------------|--------|
| B44 | HLA-B*44:36 | 989  | AEVQIDRLI     | 0,922  |
| B44 | HLA-B*44:36 | 1016 | AEIRASANL     | 0,8443 |
| B44 | HLA-B*44:36 | 1091 | REGVFVSNNGTHW | 0,7134 |
| B44 | HLA-B*44:36 | 1201 | QELGKYEQY     | 0,9687 |
| B44 | HLA-B*44:36 | 1201 | QELGKYEQYIKW  | 0,6195 |
| B44 | HLA-B*44:36 | 1206 | YEQYIKWPW     | 0,671  |
| B44 | HLA-B*44:37 | 95   | TEKSNIIRGW    | 0,826  |
| B44 | HLA-B*44:37 | 153  | MESEFRVY      | 0,5576 |
| B44 | HLA-B*44:37 | 190  | REFVFKNIDGY   | 0,5135 |
| B44 | HLA-B*44:37 | 339  | GEVFNATRF     | 0,9143 |
| B44 | HLA-B*44:37 | 464  | FERDISTEY     | 0,7083 |
| B44 | HLA-B*44:37 | 829  | ADAGFIKQY     | 0,8697 |
| B44 | HLA-B*44:37 | 989  | AEVQIDRLI     | 0,7629 |
| B44 | HLA-B*44:37 | 1016 | AEIRASANL     | 0,7138 |
| B44 | HLA-B*44:37 | 1091 | REGVFVSNNGTHW | 0,6777 |
| B44 | HLA-B*44:37 | 1201 | QELGKYEQY     | 0,902  |
| B44 | HLA-B*44:37 | 1206 | YEQYIKWPW     | 0,5676 |
| B44 | HLA-B*44:38 | 95   | TEKSNIIRGW    | 0,9553 |
| B44 | HLA-B*44:38 | 153  | MESEFRVY      | 0,5502 |
| B44 | HLA-B*44:38 | 297  | SETKCTLKSF    | 0,7221 |
| B44 | HLA-B*44:38 | 339  | GEVFNATRF     | 0,9332 |
| B44 | HLA-B*44:38 | 747  | TECSNLLLQY    | 0,6025 |
| B44 | HLA-B*44:38 | 779  | QEVFAQVKQIY   | 0,7054 |
| B44 | HLA-B*44:38 | 989  | AEVQIDRLI     | 0,922  |
| B44 | HLA-B*44:38 | 1016 | AEIRASANL     | 0,8443 |
| B44 | HLA-B*44:38 | 1091 | REGVFVSNNGTHW | 0,7134 |
| B44 | HLA-B*44:38 | 1201 | QELGKYEQY     | 0,9687 |
| B44 | HLA-B*44:38 | 1201 | QELGKYEQYIKW  | 0,6195 |
| B44 | HLA-B*44:38 | 1206 | YEQYIKWPW     | 0,671  |
| B44 | HLA-B*45:01 | 153  | MESEFRVYS     | 0,6419 |
| B44 | HLA-B*45:01 | 155  | SEFRVYSSA     | 0,8907 |
| B44 | HLA-B*45:01 | 280  | NENGTITDA     | 0,7132 |
| B44 | HLA-B*45:01 | 618  | TEVPVAIHA     | 0,9036 |
| B44 | HLA-B*45:01 | 867  | DEMIAQY TSA   | 0,5083 |
| B44 | HLA-B*45:01 | 1016 | AEIRASANL     | 0,678  |
| B44 | HLA-B*45:01 | 1016 | AEIRASANLA    | 0,8233 |
| B44 | HLA-B*45:01 | 1016 | AEIRASANLAA   | 0,6215 |
| B44 | HLA-B*45:01 | 1071 | QEKNF T TAP   | 0,5423 |
| B44 | HLA-B*45:01 | 1071 | QEKNF T TAPA  | 0,5531 |
| B44 | HLA-B*45:01 | 1181 | KEIDRLNEV     | 0,7707 |
| B44 | HLA-B*45:01 | 1181 | KEIDRLNEVA    | 0,6837 |
| B44 | HLA-B*45:03 | 153  | MESEFRVYS     | 0,6419 |
| B44 | HLA-B*45:03 | 155  | SEFRVYSSA     | 0,8907 |
| B44 | HLA-B*45:03 | 280  | NENGTITDA     | 0,7132 |
| B44 | HLA-B*45:03 | 618  | TEVPVAIHA     | 0,9036 |
| B44 | HLA-B*45:03 | 867  | DEMIAQY TSA   | 0,5083 |
| B44 | HLA-B*45:03 | 1016 | AEIRASANL     | 0,678  |
| B44 | HLA-B*45:03 | 1016 | AEIRASANLA    | 0,8233 |
| B44 | HLA-B*45:03 | 1016 | AEIRASANLAA   | 0,6215 |
| B44 | HLA-B*45:03 | 1071 | QEKNF T TAP   | 0,5423 |

|     |             |      |             |        |
|-----|-------------|------|-------------|--------|
| B44 | HLA-B*45:03 | 1071 | QEKNFITAPA  | 0,5531 |
| B44 | HLA-B*45:03 | 1181 | KEIDRLNEV   | 0,7707 |
| B44 | HLA-B*45:03 | 1181 | KEIDRLNEVA  | 0,6837 |
| B44 | HLA-B*45:04 | 153  | MESEFRVYS   | 0,6668 |
| B44 | HLA-B*45:04 | 155  | SEFRVYSSA   | 0,8728 |
| B44 | HLA-B*45:04 | 168  | FEYVSQPFL   | 0,6477 |
| B44 | HLA-B*45:04 | 280  | NENGTITDA   | 0,6169 |
| B44 | HLA-B*45:04 | 339  | GEVFNATRFA  | 0,5181 |
| B44 | HLA-B*45:04 | 464  | FERDISTEI   | 0,7909 |
| B44 | HLA-B*45:04 | 515  | FELLHAPAT   | 0,6115 |
| B44 | HLA-B*45:04 | 618  | TEVPVAIHA   | 0,9037 |
| B44 | HLA-B*45:04 | 660  | YECDPIGA    | 0,7754 |
| B44 | HLA-B*45:04 | 724  | TEILPVSMT   | 0,6427 |
| B44 | HLA-B*45:04 | 818  | IEDLLFNKV   | 0,696  |
| B44 | HLA-B*45:04 | 989  | AEVQIDRLI   | 0,7778 |
| B44 | HLA-B*45:04 | 1016 | AEIRASANL   | 0,7431 |
| B44 | HLA-B*45:04 | 1016 | AEIRASANLA  | 0,7358 |
| B44 | HLA-B*45:04 | 1016 | AEIRASANLAA | 0,6111 |
| B44 | HLA-B*45:04 | 1181 | KEIDRLNEV   | 0,8925 |
| B44 | HLA-B*45:04 | 1181 | KEIDRLNEVA  | 0,783  |
| B44 | HLA-B*45:05 | 153  | MESEFRVYS   | 0,7073 |
| B44 | HLA-B*45:05 | 155  | SEFRVYSSA   | 0,887  |
| B44 | HLA-B*45:05 | 280  | NENGTITDA   | 0,7827 |
| B44 | HLA-B*45:05 | 280  | NENGTITDAV  | 0,5501 |
| B44 | HLA-B*45:05 | 339  | GEVFNATRFA  | 0,5214 |
| B44 | HLA-B*45:05 | 618  | TEVPVAIHA   | 0,9095 |
| B44 | HLA-B*45:05 | 660  | YECDPIGA    | 0,6478 |
| B44 | HLA-B*45:05 | 867  | DEMIAQYTS   | 0,5654 |
| B44 | HLA-B*45:05 | 867  | DEMIAQY TSA | 0,6146 |
| B44 | HLA-B*45:05 | 989  | AEVQIDRLI   | 0,7684 |
| B44 | HLA-B*45:05 | 1016 | AEIRASANL   | 0,6972 |
| B44 | HLA-B*45:05 | 1016 | AEIRASANLA  | 0,8381 |
| B44 | HLA-B*45:05 | 1016 | AEIRASANLAA | 0,6471 |
| B44 | HLA-B*45:05 | 1071 | QEKNFITAP   | 0,638  |
| B44 | HLA-B*45:05 | 1071 | QEKNFITAPA  | 0,6366 |
| B44 | HLA-B*45:05 | 1181 | KEIDRLNEV   | 0,7759 |
| B44 | HLA-B*45:05 | 1181 | KEIDRLNEVA  | 0,7116 |
| B44 | HLA-B*45:07 | 153  | MESEFRVYS   | 0,6419 |
| B44 | HLA-B*45:07 | 155  | SEFRVYSSA   | 0,8907 |
| B44 | HLA-B*45:07 | 280  | NENGTITDA   | 0,7132 |
| B44 | HLA-B*45:07 | 618  | TEVPVAIHA   | 0,9036 |
| B44 | HLA-B*45:07 | 867  | DEMIAQY TSA | 0,5083 |
| B44 | HLA-B*45:07 | 1016 | AEIRASANL   | 0,678  |
| B44 | HLA-B*45:07 | 1016 | AEIRASANLA  | 0,8233 |
| B44 | HLA-B*45:07 | 1016 | AEIRASANLAA | 0,6215 |
| B44 | HLA-B*45:07 | 1071 | QEKNFITAP   | 0,5423 |
| B44 | HLA-B*45:07 | 1071 | QEKNFITAPA  | 0,5531 |
| B44 | HLA-B*45:07 | 1181 | KEIDRLNEV   | 0,7707 |
| B44 | HLA-B*45:07 | 1181 | KEIDRLNEVA  | 0,6837 |
| B44 | HLA-B*49:04 | 339  | GEVFNATRF   | 0,7684 |

|     |             |      |            |        |
|-----|-------------|------|------------|--------|
| B44 | HLA-B*49:04 | 464  | FERDISTEI  | 0,6468 |
| B44 | HLA-B*49:04 | 989  | AEVQIDRLI  | 0,7729 |
| B44 | HLA-B*50:01 | 153  | MESEFRVYS  | 0,5279 |
| B44 | HLA-B*50:01 | 155  | SEFRVYSSA  | 0,9313 |
| B44 | HLA-B*50:01 | 168  | FEYVSQLPFL | 0,5682 |
| B44 | HLA-B*50:01 | 464  | FERDISTEI  | 0,8164 |
| B44 | HLA-B*50:01 | 515  | FELLHAPAT  | 0,5692 |
| B44 | HLA-B*50:01 | 618  | TEVPVAIHA  | 0,8958 |
| B44 | HLA-B*50:01 | 660  | YECDIPIGA  | 0,7228 |
| B44 | HLA-B*50:01 | 1016 | AEIRASANL  | 0,635  |
| B44 | HLA-B*50:01 | 1016 | AEIRASANLA | 0,6321 |
| B44 | HLA-B*50:01 | 1181 | KEIDRLNEV  | 0,8625 |
| B44 | HLA-B*50:01 | 1181 | KEIDRLNEVA | 0,7661 |
| B44 | HLA-B*50:02 | 155  | SEFRVYSSA  | 0,8534 |
| B44 | HLA-B*50:02 | 280  | NENGTITDA  | 0,5939 |
| B44 | HLA-B*50:02 | 618  | TEVPVAIHA  | 0,8364 |
| B44 | HLA-B*50:02 | 1016 | AEIRASANLA | 0,6537 |
| B44 | HLA-B*50:02 | 1181 | KEIDRLNEVA | 0,5821 |
| B44 | HLA-B*50:04 | 153  | MESEFRVYS  | 0,5279 |
| B44 | HLA-B*50:04 | 155  | SEFRVYSSA  | 0,9313 |
| B44 | HLA-B*50:04 | 168  | FEYVSQLPFL | 0,5682 |
| B44 | HLA-B*50:04 | 464  | FERDISTEI  | 0,8164 |
| B44 | HLA-B*50:04 | 515  | FELLHAPAT  | 0,5692 |
| B44 | HLA-B*50:04 | 618  | TEVPVAIHA  | 0,8958 |
| B44 | HLA-B*50:04 | 660  | YECDIPIGA  | 0,7228 |
| B44 | HLA-B*50:04 | 1016 | AEIRASANL  | 0,635  |
| B44 | HLA-B*50:04 | 1016 | AEIRASANLA | 0,6321 |
| B44 | HLA-B*50:04 | 1181 | KEIDRLNEV  | 0,8625 |
| B44 | HLA-B*50:04 | 1181 | KEIDRLNEVA | 0,7661 |
| B58 | HLA-B*15:16 | 34   | RGVYYPDKVF | 0,6031 |
| B58 | HLA-B*15:16 | 50   | STQDLFLPF  | 0,5575 |
| B58 | HLA-B*15:16 | 160  | YSSANNCTF  | 0,7436 |
| B58 | HLA-B*15:16 | 258  | WTAGAAAYY  | 0,6769 |
| B58 | HLA-B*15:16 | 267  | VGYLQPRTF  | 0,6255 |
| B58 | HLA-B*15:16 | 304  | KSFTVEKGI  | 0,6627 |
| B58 | HLA-B*15:16 | 344  | ATRFASVYAW | 0,5424 |
| B58 | HLA-B*15:16 | 372  | ASFSTFKCY  | 0,5797 |
| B58 | HLA-B*15:16 | 392  | FTNVYADSF  | 0,6268 |
| B58 | HLA-B*15:16 | 590  | CSFGGVSVI  | 0,5898 |
| B58 | HLA-B*15:16 | 604  | TSNQVAVLY  | 0,7291 |
| B58 | HLA-B*15:16 | 634  | RVYSTGSNV  | 0,5284 |
| B58 | HLA-B*15:16 | 634  | RVYSTGSNVF | 0,7452 |
| B58 | HLA-B*15:16 | 685  | RSVASQSII  | 0,7268 |
| B58 | HLA-B*15:16 | 687  | VASQSIIAY  | 0,7282 |
| B58 | HLA-B*15:16 | 710  | NSIAIPTNF  | 0,7782 |
| B58 | HLA-B*15:16 | 712  | IAIPTNFTI  | 0,8768 |
| B58 | HLA-B*15:16 | 718  | FTISVTTEI  | 0,7002 |
| B58 | HLA-B*15:16 | 733  | KTSVDCTMY  | 0,5204 |
| B58 | HLA-B*15:16 | 814  | KRSFIEDLLF | 0,6401 |
| B58 | HLA-B*15:16 | 815  | RSFIEDLLF  | 0,9347 |



|     |             |      |             |        |
|-----|-------------|------|-------------|--------|
| B58 | HLA-B*15:16 | 825  | KVTLADAGF   | 0,5684 |
| B58 | HLA-B*15:16 | 865  | LTDEMIAQY   | 0,7522 |
| B58 | HLA-B*15:16 | 878  | LAGTITSGW   | 0,5789 |
| B58 | HLA-B*15:16 | 879  | AGTITSGWTF  | 0,542  |
| B58 | HLA-B*15:16 | 880  | GTITSGWTF   | 0,8294 |
| B58 | HLA-B*15:16 | 886  | WTFGAGAAL   | 0,5705 |
| B58 | HLA-B*15:16 | 898  | FAMQMAYRF   | 0,655  |
| B58 | HLA-B*15:16 | 923  | IANQFNSAI   | 0,5744 |
| B58 | HLA-B*15:16 | 1005 | QTYVTQQLI   | 0,6943 |
| B58 | HLA-B*15:16 | 1054 | QSAPHGVSF   | 0,8856 |
| B58 | HLA-B*15:16 | 1086 | KAHFPREGVF  | 0,5268 |
| B58 | HLA-B*15:16 | 1093 | GVFVSNQTHW  | 0,5731 |
| B58 | HLA-B*15:17 | 21   | RTQLPPAY    | 0,729  |
| B58 | HLA-B*15:17 | 28   | YTNSFTRGVY  | 0,712  |
| B58 | HLA-B*15:17 | 29   | TNSFTRGVYY  | 0,6428 |
| B58 | HLA-B*15:17 | 30   | NSFTRGVYY   | 0,8886 |
| B58 | HLA-B*15:17 | 34   | RGVYYPDKVF  | 0,7986 |
| B58 | HLA-B*15:17 | 35   | GVYYPDKVF   | 0,8911 |
| B58 | HLA-B*15:17 | 50   | STQDLFLPF   | 0,7926 |
| B58 | HLA-B*15:17 | 158  | RVYSSANNCTF | 0,6804 |
| B58 | HLA-B*15:17 | 160  | YSSANNCTF   | 0,8168 |
| B58 | HLA-B*15:17 | 192  | FVFKNIDGY   | 0,8376 |
| B58 | HLA-B*15:17 | 204  | YSKHTPINL   | 0,7655 |
| B58 | HLA-B*15:17 | 212  | LVRDLPQGF   | 0,867  |
| B58 | HLA-B*15:17 | 257  | GWTAGAAAYY  | 0,6825 |
| B58 | HLA-B*15:17 | 258  | WTAGAAAYY   | 0,9236 |
| B58 | HLA-B*15:17 | 261  | GAAAYYVGY   | 0,8951 |
| B58 | HLA-B*15:17 | 267  | VGYLQPRTF   | 0,7451 |
| B58 | HLA-B*15:17 | 304  | KSFTVEKGI   | 0,6634 |
| B58 | HLA-B*15:17 | 304  | KSFTVEKGIY  | 0,7603 |
| B58 | HLA-B*15:17 | 310  | KGIYQTSNF   | 0,719  |
| B58 | HLA-B*15:17 | 344  | ATRFASVYAW  | 0,7702 |
| B58 | HLA-B*15:17 | 361  | CVADYSVLY   | 0,6496 |
| B58 | HLA-B*15:17 | 366  | SVLYNSASF   | 0,8204 |
| B58 | HLA-B*15:17 | 372  | ASFSTFKCY   | 0,828  |
| B58 | HLA-B*15:17 | 392  | FTNVYADSF   | 0,7806 |
| B58 | HLA-B*15:17 | 604  | TSNQVAVLY   | 0,9455 |
| B58 | HLA-B*15:17 | 625  | HADQLTPTW   | 0,846  |
| B58 | HLA-B*15:17 | 634  | RVYSTGSNV   | 0,6546 |
| B58 | HLA-B*15:17 | 634  | RVYSTGSNVF  | 0,9115 |
| B58 | HLA-B*15:17 | 685  | RSVASQSII   | 0,7537 |
| B58 | HLA-B*15:17 | 687  | VASQSIIAY   | 0,9477 |
| B58 | HLA-B*15:17 | 710  | NSIAIPTNF   | 0,9195 |
| B58 | HLA-B*15:17 | 712  | IAIPTNFTI   | 0,867  |
| B58 | HLA-B*15:17 | 718  | FTISVTTEI   | 0,7184 |
| B58 | HLA-B*15:17 | 733  | KTSVDCTMY   | 0,8517 |
| B58 | HLA-B*15:17 | 814  | KRSFIEDLLF  | 0,7282 |
| B58 | HLA-B*15:17 | 815  | RSFIEDLLF   | 0,9846 |
| B58 | HLA-B*15:17 | 825  | KVTLADAGF   | 0,8775 |
| B58 | HLA-B*15:17 | 865  | LTDEMIAQY   | 0,9166 |

|     |             |      |             |        |
|-----|-------------|------|-------------|--------|
| B58 | HLA-B*15:17 | 878  | LAGTITSGW   | 0,7922 |
| B58 | HLA-B*15:17 | 879  | AGTITSGWTF  | 0,7247 |
| B58 | HLA-B*15:17 | 880  | GTITSGWTF   | 0,9585 |
| B58 | HLA-B*15:17 | 886  | WTFGAGAAL   | 0,7745 |
| B58 | HLA-B*15:17 | 892  | AALQIPFAM   | 0,6696 |
| B58 | HLA-B*15:17 | 898  | FAMQMAYRF   | 0,7486 |
| B58 | HLA-B*15:17 | 940  | STASALGKL   | 0,7384 |
| B58 | HLA-B*15:17 | 962  | LVKQLSSNF   | 0,7867 |
| B58 | HLA-B*15:17 | 1005 | QTYVTQQLI   | 0,7371 |
| B58 | HLA-B*15:17 | 1021 | SANLAATKM   | 0,6738 |
| B58 | HLA-B*15:17 | 1054 | QSAPHGVVF   | 0,9815 |
| B58 | HLA-B*15:17 | 1086 | KAHFPREGVF  | 0,7038 |
| B58 | HLA-B*15:17 | 1093 | GVFVSNGTHW  | 0,7853 |
| B58 | HLA-B*15:17 | 1095 | FVSNGTHWF   | 0,6814 |
| B58 | HLA-B*15:67 | 34   | RGVYYPDKVF  | 0,6031 |
| B58 | HLA-B*15:67 | 50   | STQDLFLPF   | 0,5575 |
| B58 | HLA-B*15:67 | 160  | YSSANNCTF   | 0,7436 |
| B58 | HLA-B*15:67 | 258  | WTAGAAAYY   | 0,6769 |
| B58 | HLA-B*15:67 | 267  | VGYLQPRTF   | 0,6255 |
| B58 | HLA-B*15:67 | 304  | KSFTVEKGI   | 0,6627 |
| B58 | HLA-B*15:67 | 344  | ATRFASVYAW  | 0,5424 |
| B58 | HLA-B*15:67 | 372  | ASFSTFKCY   | 0,5797 |
| B58 | HLA-B*15:67 | 392  | FTNVYADSF   | 0,6268 |
| B58 | HLA-B*15:67 | 590  | CSFGGVSVI   | 0,5898 |
| B58 | HLA-B*15:67 | 604  | TSNQVAVLY   | 0,7291 |
| B58 | HLA-B*15:67 | 634  | RVYSTGSNV   | 0,5284 |
| B58 | HLA-B*15:67 | 634  | RVYSTGSNVF  | 0,7452 |
| B58 | HLA-B*15:67 | 685  | RSVASQSII   | 0,7268 |
| B58 | HLA-B*15:67 | 687  | VASQSIIAY   | 0,7282 |
| B58 | HLA-B*15:67 | 710  | NSIAIPTNF   | 0,7782 |
| B58 | HLA-B*15:67 | 712  | IAIPTNFTI   | 0,8768 |
| B58 | HLA-B*15:67 | 718  | FTISVTTEI   | 0,7002 |
| B58 | HLA-B*15:67 | 733  | KTSVDCTMY   | 0,5204 |
| B58 | HLA-B*15:67 | 814  | KRSFIEDLLF  | 0,6401 |
| B58 | HLA-B*15:67 | 815  | RSFIEDLLF   | 0,9347 |
| B58 | HLA-B*15:67 | 825  | KVTLADAGF   | 0,5684 |
| B58 | HLA-B*15:67 | 865  | LTDEMIAQY   | 0,7522 |
| B58 | HLA-B*15:67 | 878  | LAGTITSGW   | 0,5789 |
| B58 | HLA-B*15:67 | 879  | AGTITSGWTF  | 0,542  |
| B58 | HLA-B*15:67 | 880  | GTITSGWTF   | 0,8294 |
| B58 | HLA-B*15:67 | 886  | WTFGAGAAL   | 0,5705 |
| B58 | HLA-B*15:67 | 898  | FAMQMAYRF   | 0,655  |
| B58 | HLA-B*15:67 | 923  | IANQFNSAI   | 0,5744 |
| B58 | HLA-B*15:67 | 1005 | QTYVTQQLI   | 0,6943 |
| B58 | HLA-B*15:67 | 1054 | QSAPHGVVF   | 0,8856 |
| B58 | HLA-B*15:67 | 1086 | KAHFPREGVF  | 0,5268 |
| B58 | HLA-B*15:67 | 1093 | GVFVSNGTHW  | 0,5731 |
| B58 | HLA-B*15:95 | 34   | RGVYYPDKVF  | 0,5969 |
| B58 | HLA-B*15:95 | 50   | STQDLFLPF   | 0,5282 |
| B58 | HLA-B*15:95 | 158  | RVYSSANNCTF | 0,5058 |

|     |             |      |              |        |
|-----|-------------|------|--------------|--------|
| B58 | HLA-B*15:95 | 160  | YSSANNCTF    | 0,7058 |
| B58 | HLA-B*15:95 | 258  | WTAGAAAYY    | 0,6382 |
| B58 | HLA-B*15:95 | 267  | VGYLQPRTF    | 0,6579 |
| B58 | HLA-B*15:95 | 304  | KSFTVEKGI    | 0,6907 |
| B58 | HLA-B*15:95 | 304  | KSFTVEKGIY   | 0,5666 |
| B58 | HLA-B*15:95 | 310  | KGIYQTSNF    | 0,5569 |
| B58 | HLA-B*15:95 | 344  | ATRFASVYAW   | 0,5798 |
| B58 | HLA-B*15:95 | 372  | ASFSTFKCY    | 0,6011 |
| B58 | HLA-B*15:95 | 392  | FTNVYADSF    | 0,5426 |
| B58 | HLA-B*15:95 | 590  | CSFGGVSVI    | 0,5003 |
| B58 | HLA-B*15:95 | 604  | TSNQVAVLY    | 0,7366 |
| B58 | HLA-B*15:95 | 625  | HADQLTPTW    | 0,7356 |
| B58 | HLA-B*15:95 | 634  | RVYSTGSNVF   | 0,7402 |
| B58 | HLA-B*15:95 | 685  | RSVASQSII    | 0,7531 |
| B58 | HLA-B*15:95 | 687  | VASQSIIAY    | 0,7264 |
| B58 | HLA-B*15:95 | 710  | NSIAIPTNF    | 0,7623 |
| B58 | HLA-B*15:95 | 712  | IAIPTNFTI    | 0,8481 |
| B58 | HLA-B*15:95 | 718  | FTISVTTEI    | 0,5787 |
| B58 | HLA-B*15:95 | 733  | KTSVDCTMY    | 0,5963 |
| B58 | HLA-B*15:95 | 814  | KRSFIEDLLF   | 0,6782 |
| B58 | HLA-B*15:95 | 815  | RSFIEDLLF    | 0,9594 |
| B58 | HLA-B*15:95 | 825  | KVTLADAGF    | 0,5677 |
| B58 | HLA-B*15:95 | 878  | LAGTITSGW    | 0,5751 |
| B58 | HLA-B*15:95 | 879  | AGTITSGWTF   | 0,5289 |
| B58 | HLA-B*15:95 | 880  | GTITSGWTF    | 0,8368 |
| B58 | HLA-B*15:95 | 898  | FAMQMAYRF    | 0,5752 |
| B58 | HLA-B*15:95 | 923  | IANQFNSAI    | 0,5088 |
| B58 | HLA-B*15:95 | 1005 | QTYVTQQLI    | 0,6101 |
| B58 | HLA-B*15:95 | 1054 | QSAPHGVSF    | 0,8744 |
| B58 | HLA-B*15:95 | 1086 | KAHFPREGVF   | 0,5522 |
| B58 | HLA-B*15:95 | 1093 | GVFVSNATHW   | 0,6012 |
| B58 | HLA-B*57:01 | 97   | KSNIRGW      | 0,8688 |
| B58 | HLA-B*57:01 | 304  | KSFTVEKGI    | 0,5385 |
| B58 | HLA-B*57:01 | 344  | ATRFASVYAW   | 0,7634 |
| B58 | HLA-B*57:01 | 622  | VAIHADQLTPTW | 0,5506 |
| B58 | HLA-B*57:01 | 625  | HADQLTPTW    | 0,8783 |
| B58 | HLA-B*57:01 | 712  | IAIPTNFTI    | 0,5812 |
| B58 | HLA-B*57:01 | 815  | RSFIEDLLF    | 0,868  |
| B58 | HLA-B*57:01 | 878  | LAGTITSGW    | 0,7806 |
| B58 | HLA-B*57:01 | 880  | GTITSGWTF    | 0,7834 |
| B58 | HLA-B*57:01 | 1093 | GVFVSNATHW   | 0,7168 |
| B58 | HLA-B*57:02 | 160  | YSSANNCTF    | 0,5613 |
| B58 | HLA-B*57:02 | 249  | LTPGDSSSGW   | 0,5051 |
| B58 | HLA-B*57:02 | 344  | ATRFASVYAW   | 0,6112 |
| B58 | HLA-B*57:02 | 622  | VAIHADQLTPTW | 0,6009 |
| B58 | HLA-B*57:02 | 624  | IHADQLTPTW   | 0,6898 |
| B58 | HLA-B*57:02 | 625  | HADQLTPTW    | 0,9339 |
| B58 | HLA-B*57:02 | 712  | IAIPTNFTI    | 0,6703 |
| B58 | HLA-B*57:02 | 815  | RSFIEDLLF    | 0,8365 |
| B58 | HLA-B*57:02 | 878  | LAGTITSGW    | 0,7731 |

|     |             |      |              |        |
|-----|-------------|------|--------------|--------|
| B58 | HLA-B*57:02 | 880  | GTITSGWTF    | 0,7332 |
| B58 | HLA-B*57:02 | 1054 | QSAPHGVVF    | 0,8599 |
| B58 | HLA-B*57:03 | 97   | KSNIIRGW     | 0,5712 |
| B58 | HLA-B*57:03 | 160  | YSSANNCTF    | 0,52   |
| B58 | HLA-B*57:03 | 304  | KSFTVEKGI    | 0,5693 |
| B58 | HLA-B*57:03 | 344  | ATRFASVYAW   | 0,6947 |
| B58 | HLA-B*57:03 | 622  | VAIHADQLTPTW | 0,6476 |
| B58 | HLA-B*57:03 | 624  | IHADQLTPTW   | 0,6328 |
| B58 | HLA-B*57:03 | 625  | HADQLTPTW    | 0,9284 |
| B58 | HLA-B*57:03 | 634  | RVYSTGSNVF   | 0,5104 |
| B58 | HLA-B*57:03 | 685  | RSVASQSII    | 0,56   |
| B58 | HLA-B*57:03 | 710  | NSIAIPTNF    | 0,7756 |
| B58 | HLA-B*57:03 | 712  | IAIPTNFTI    | 0,8166 |
| B58 | HLA-B*57:03 | 814  | KRSFIEDLLF   | 0,5259 |
| B58 | HLA-B*57:03 | 815  | RSFIEDLLF    | 0,9134 |
| B58 | HLA-B*57:03 | 825  | KVTLADAGF    | 0,5236 |
| B58 | HLA-B*57:03 | 878  | LAGTITSGW    | 0,816  |
| B58 | HLA-B*57:03 | 880  | GTITSGWTF    | 0,8295 |
| B58 | HLA-B*57:03 | 898  | FAMQMAYRF    | 0,5657 |
| B58 | HLA-B*57:03 | 1054 | QSAPHGVVF    | 0,8674 |
| B58 | HLA-B*57:03 | 1093 | GVFVSNGTHW   | 0,6139 |
| B58 | HLA-B*57:07 | 344  | ATRFASVYAW   | 0,5647 |
| B58 | HLA-B*57:07 | 344  | ATRFASVYAW   | 0,5647 |
| B58 | HLA-B*57:07 | 344  | ATRFASVYAW   | 0,5647 |
| B58 | HLA-B*57:07 | 344  | ATRFASVYAW   | 0,5647 |
| B58 | HLA-B*57:07 | 625  | HADQLTPTW    | 0,8776 |
| B58 | HLA-B*57:07 | 625  | HADQLTPTW    | 0,8776 |
| B58 | HLA-B*57:07 | 625  | HADQLTPTW    | 0,8776 |
| B58 | HLA-B*57:07 | 625  | HADQLTPTW    | 0,8776 |
| B58 | HLA-B*57:07 | 712  | IAIPTNFTI    | 0,6961 |
| B58 | HLA-B*57:07 | 712  | IAIPTNFTI    | 0,6961 |
| B58 | HLA-B*57:07 | 712  | IAIPTNFTI    | 0,6961 |
| B58 | HLA-B*57:07 | 712  | IAIPTNFTI    | 0,6961 |
| B58 | HLA-B*57:07 | 815  | RSFIEDLLF    | 0,7639 |
| B58 | HLA-B*57:07 | 815  | RSFIEDLLF    | 0,7639 |
| B58 | HLA-B*57:07 | 815  | RSFIEDLLF    | 0,7639 |
| B58 | HLA-B*57:07 | 815  | RSFIEDLLF    | 0,7639 |
| B58 | HLA-B*57:07 | 878  | LAGTITSGW    | 0,6899 |
| B58 | HLA-B*57:07 | 878  | LAGTITSGW    | 0,6899 |
| B58 | HLA-B*57:07 | 878  | LAGTITSGW    | 0,6899 |
| B58 | HLA-B*57:07 | 878  | LAGTITSGW    | 0,6899 |
| B58 | HLA-B*57:07 | 880  | GTITSGWTF    | 0,6913 |
| B58 | HLA-B*57:07 | 880  | GTITSGWTF    | 0,6913 |
| B58 | HLA-B*57:07 | 880  | GTITSGWTF    | 0,6913 |
| B58 | HLA-B*57:07 | 880  | GTITSGWTF    | 0,6913 |
| B58 | HLA-B*57:07 | 898  | FAMQMAYRF    | 0,5331 |
| B58 | HLA-B*57:07 | 898  | FAMQMAYRF    | 0,5331 |
| B58 | HLA-B*57:07 | 898  | FAMQMAYRF    | 0,5331 |
| B58 | HLA-B*57:07 | 898  | FAMQMAYRF    | 0,5331 |
| B58 | HLA-B*57:08 | 97   | KSNIIRGW     | 0,8688 |

|     |             |      |              |        |
|-----|-------------|------|--------------|--------|
| B58 | HLA-B*57:08 | 304  | KSFTVEKGI    | 0,5385 |
| B58 | HLA-B*57:08 | 344  | ATRFASVYAW   | 0,7634 |
| B58 | HLA-B*57:08 | 622  | VAIHADQLTPTW | 0,5506 |
| B58 | HLA-B*57:08 | 625  | HADQLTPTW    | 0,8783 |
| B58 | HLA-B*57:08 | 712  | IAIPTNFTI    | 0,5812 |
| B58 | HLA-B*57:08 | 815  | RSFIEDLLF    | 0,868  |
| B58 | HLA-B*57:08 | 878  | LAGTITSGW    | 0,7806 |
| B58 | HLA-B*57:08 | 880  | GTITSGWTF    | 0,7834 |
| B58 | HLA-B*57:08 | 1093 | GVFVSNQTHW   | 0,7168 |
| B58 | HLA-B*57:09 | 344  | ATRFASVYAW   | 0,5174 |
| B58 | HLA-B*57:09 | 634  | RVYSTGSNVF   | 0,591  |
| B58 | HLA-B*57:09 | 712  | IAIPTNFTI    | 0,5816 |
| B58 | HLA-B*57:09 | 815  | RSFIEDLLF    | 0,7555 |
| B58 | HLA-B*57:09 | 878  | LAGTITSGW    | 0,5423 |
| B58 | HLA-B*57:09 | 880  | GTITSGWTF    | 0,7045 |
| B58 | HLA-B*57:09 | 1054 | QSAPHGVVF    | 0,7826 |
| B58 | HLA-B*57:09 | 1086 | KAHFPREGVF   | 0,5053 |
| B58 | HLA-B*58:01 | 97   | KSNIRGW      | 0,6994 |
| B58 | HLA-B*58:01 | 160  | YSSANNCTF    | 0,5597 |
| B58 | HLA-B*58:01 | 344  | ATRFASVYAW   | 0,7778 |
| B58 | HLA-B*58:01 | 604  | TSNQVAVLY    | 0,7554 |
| B58 | HLA-B*58:01 | 622  | VAIHADQLTPTW | 0,7607 |
| B58 | HLA-B*58:01 | 624  | IHADQLTPTW   | 0,7759 |
| B58 | HLA-B*58:01 | 625  | HADQLTPTW    | 0,9737 |
| B58 | HLA-B*58:01 | 687  | VASQSIAY     | 0,6802 |
| B58 | HLA-B*58:01 | 710  | NSIAIPTNF    | 0,8133 |
| B58 | HLA-B*58:01 | 712  | IAIPTNFTI    | 0,8079 |
| B58 | HLA-B*58:01 | 814  | KRSFIEDLLF   | 0,5656 |
| B58 | HLA-B*58:01 | 815  | RSFIEDLLF    | 0,9373 |
| B58 | HLA-B*58:01 | 878  | LAGTITSGW    | 0,8666 |
| B58 | HLA-B*58:01 | 880  | GTITSGWTF    | 0,879  |
| B58 | HLA-B*58:01 | 898  | FAMQMAYRF    | 0,6403 |
| B58 | HLA-B*58:01 | 1054 | QSAPHGVVF    | 0,8091 |
| B58 | HLA-B*58:01 | 1093 | GVFVSNQTHW   | 0,7252 |
| B58 | HLA-B*58:02 | 815  | RSFIEDLLF    | 0,6532 |
| B58 | HLA-B*58:04 | 56   | LPFFSNVTW    | 0,5448 |
| B58 | HLA-B*58:04 | 97   | KSNIRGW      | 0,6084 |
| B58 | HLA-B*58:04 | 160  | YSSANNCTF    | 0,5817 |
| B58 | HLA-B*58:04 | 344  | ATRFASVYAW   | 0,7355 |
| B58 | HLA-B*58:04 | 604  | TSNQVAVLY    | 0,7164 |
| B58 | HLA-B*58:04 | 622  | VAIHADQLTPTW | 0,7105 |
| B58 | HLA-B*58:04 | 624  | IHADQLTPTW   | 0,7479 |
| B58 | HLA-B*58:04 | 625  | HADQLTPTW    | 0,9681 |
| B58 | HLA-B*58:04 | 687  | VASQSIAY     | 0,648  |
| B58 | HLA-B*58:04 | 710  | NSIAIPTNF    | 0,7658 |
| B58 | HLA-B*58:04 | 712  | IAIPTNFTI    | 0,7552 |
| B58 | HLA-B*58:04 | 814  | KRSFIEDLLF   | 0,5733 |
| B58 | HLA-B*58:04 | 815  | RSFIEDLLF    | 0,9452 |
| B58 | HLA-B*58:04 | 878  | LAGTITSGW    | 0,801  |
| B58 | HLA-B*58:04 | 880  | GTITSGWTF    | 0,8598 |

|     |             |      |              |        |
|-----|-------------|------|--------------|--------|
| B58 | HLA-B*58:04 | 892  | AALQIPFAM    | 0,5093 |
| B58 | HLA-B*58:04 | 898  | FAMQMAYRF    | 0,6552 |
| B58 | HLA-B*58:04 | 1054 | QSAPHGVVF    | 0,808  |
| B58 | HLA-B*58:04 | 1093 | GVFVSNQTHW   | 0,6243 |
| B58 | HLA-B*58:06 | 815  | RSFIEDLLF    | 0,7373 |
| B58 | HLA-B*58:08 | 62   | VTWFHAIHV    | 0,5966 |
| B58 | HLA-B*58:08 | 304  | KSFTVEKGI    | 0,7929 |
| B58 | HLA-B*58:08 | 590  | CSFGGVSVI    | 0,664  |
| B58 | HLA-B*58:08 | 685  | RSVASQSI     | 0,5963 |
| B58 | HLA-B*58:08 | 685  | RSVASQSII    | 0,7492 |
| B58 | HLA-B*58:08 | 697  | MSLGAENSV    | 0,5739 |
| B58 | HLA-B*58:08 | 711  | SIAIPTNFTI   | 0,6417 |
| B58 | HLA-B*58:08 | 712  | IAIPTNFTI    | 0,9331 |
| B58 | HLA-B*58:08 | 718  | FTISVTTEI    | 0,7015 |
| B58 | HLA-B*58:08 | 815  | RSFIEDLLF    | 0,7859 |
| B58 | HLA-B*58:08 | 923  | IANQFNSAI    | 0,6908 |
| B58 | HLA-B*58:08 | 1005 | QTYVTQQLI    | 0,8005 |
| B58 | HLA-B*58:09 | 56   | LPFFSNVTW    | 0,6098 |
| B58 | HLA-B*58:09 | 97   | KSNIIRGW     | 0,7131 |
| B58 | HLA-B*58:09 | 160  | YSSANNCTF    | 0,5758 |
| B58 | HLA-B*58:09 | 258  | WTAGAAAYY    | 0,5718 |
| B58 | HLA-B*58:09 | 304  | KSFTVEKGIY   | 0,5095 |
| B58 | HLA-B*58:09 | 344  | ATRFASVYAW   | 0,7902 |
| B58 | HLA-B*58:09 | 604  | TSNQVAVLY    | 0,8181 |
| B58 | HLA-B*58:09 | 622  | VAIHADQLTPTW | 0,8017 |
| B58 | HLA-B*58:09 | 623  | AIHADQLTPTW  | 0,5232 |
| B58 | HLA-B*58:09 | 624  | IHADQLTPTW   | 0,8068 |
| B58 | HLA-B*58:09 | 625  | HADQLTPTW    | 0,969  |
| B58 | HLA-B*58:09 | 687  | VASQSIAY     | 0,7266 |
| B58 | HLA-B*58:09 | 710  | NSIAIPTNF    | 0,8466 |
| B58 | HLA-B*58:09 | 712  | IAIPTNFTI    | 0,8112 |
| B58 | HLA-B*58:09 | 733  | KTSVDCTMY    | 0,5183 |
| B58 | HLA-B*58:09 | 814  | KRSFIEDLLF   | 0,5561 |
| B58 | HLA-B*58:09 | 815  | RSFIEDLLF    | 0,8962 |
| B58 | HLA-B*58:09 | 878  | LAGTITSGW    | 0,8826 |
| B58 | HLA-B*58:09 | 879  | AGTITSGWTF   | 0,5228 |
| B58 | HLA-B*58:09 | 880  | GTITSGWTF    | 0,86   |
| B58 | HLA-B*58:09 | 892  | AALQIPFAM    | 0,5678 |
| B58 | HLA-B*58:09 | 898  | FAMQMAYRF    | 0,7372 |
| B58 | HLA-B*58:09 | 1054 | QSAPHGVVF    | 0,8091 |
| B58 | HLA-B*58:09 | 1093 | GVFVSNQTHW   | 0,7325 |
| B58 | HLA-B*58:11 | 97   | KSNIIRGW     | 0,6994 |
| B58 | HLA-B*58:11 | 160  | YSSANNCTF    | 0,5597 |
| B58 | HLA-B*58:11 | 344  | ATRFASVYAW   | 0,7778 |
| B58 | HLA-B*58:11 | 604  | TSNQVAVLY    | 0,7554 |
| B58 | HLA-B*58:11 | 622  | VAIHADQLTPTW | 0,7607 |
| B58 | HLA-B*58:11 | 624  | IHADQLTPTW   | 0,7759 |
| B58 | HLA-B*58:11 | 625  | HADQLTPTW    | 0,9737 |
| B58 | HLA-B*58:11 | 687  | VASQSIAY     | 0,6802 |
| B58 | HLA-B*58:11 | 710  | NSIAIPTNF    | 0,8133 |

|     |             |      |            |        |
|-----|-------------|------|------------|--------|
| B58 | HLA-B*58:11 | 712  | IAIPTNFTI  | 0,8079 |
| B58 | HLA-B*58:11 | 814  | KRSFIEDLLF | 0,5656 |
| B58 | HLA-B*58:11 | 815  | RSFIEDLLF  | 0,9373 |
| B58 | HLA-B*58:11 | 878  | LAGTITSGW  | 0,8666 |
| B58 | HLA-B*58:11 | 880  | GTITSGWTF  | 0,879  |
| B58 | HLA-B*58:11 | 898  | FAMQMAYRF  | 0,6403 |
| B58 | HLA-B*58:11 | 1054 | QSAPHGVPF  | 0,8091 |
| B58 | HLA-B*58:11 | 1093 | GVFVSNQTHW | 0,7252 |
| B62 | HLA-B*15:01 | 35   | GVYYPDKVF  | 0,677  |
| B62 | HLA-B*15:01 | 47   | VLHSTQDLF  | 0,5635 |
| B62 | HLA-B*15:01 | 192  | FVFKNIDGY  | 0,678  |
| B62 | HLA-B*15:01 | 212  | LVRDLPQGF  | 0,7136 |
| B62 | HLA-B*15:01 | 240  | TLLALHRSY  | 0,6805 |
| B62 | HLA-B*15:01 | 258  | WTAGAAAYY  | 0,5072 |
| B62 | HLA-B*15:01 | 261  | GAAAYYVGY  | 0,52   |
| B62 | HLA-B*15:01 | 366  | SVLYNSASF  | 0,5995 |
| B62 | HLA-B*15:01 | 413  | GQTGKIADY  | 0,764  |
| B62 | HLA-B*15:01 | 497  | FQPTNGVGY  | 0,7039 |
| B62 | HLA-B*15:01 | 628  | QLTPTWRVY  | 0,6565 |
| B62 | HLA-B*15:01 | 634  | RVYSTGSNVF | 0,8491 |
| B62 | HLA-B*15:01 | 686  | SVASQSIAY  | 0,5924 |
| B62 | HLA-B*15:01 | 687  | VASQSIAY   | 0,7822 |
| B62 | HLA-B*15:01 | 698  | SLGAENSVAY | 0,6839 |
| B62 | HLA-B*15:01 | 880  | GTITSGWTF  | 0,6048 |
| B62 | HLA-B*15:01 | 894  | LQIPFAMQM  | 0,6403 |
| B62 | HLA-B*15:01 | 919  | NQKLIANQF  | 0,7035 |
| B62 | HLA-B*15:01 | 962  | LVKQLSSNF  | 0,7084 |
| B62 | HLA-B*15:01 | 1000 | RLQSLQTY   | 0,5767 |
| B62 | HLA-B*15:01 | 1054 | QSAPHGVPF  | 0,7211 |
| B62 | HLA-B*15:01 | 1113 | QIITDNTF   | 0,6229 |
| B62 | HLA-B*15:01 | 1264 | VLKGVKLHY  | 0,8811 |
| B62 | HLA-B*15:02 | 84   | LPFNDGVYF  | 0,5012 |
| B62 | HLA-B*15:02 | 192  | FVFKNIDGY  | 0,6067 |
| B62 | HLA-B*15:02 | 212  | LVRDLPQGF  | 0,5599 |
| B62 | HLA-B*15:02 | 240  | TLLALHRSY  | 0,6225 |
| B62 | HLA-B*15:02 | 366  | SVLYNSASF  | 0,593  |
| B62 | HLA-B*15:02 | 628  | QLTPTWRVY  | 0,6554 |
| B62 | HLA-B*15:02 | 687  | VASQSIAY   | 0,8247 |
| B62 | HLA-B*15:02 | 698  | SLGAENSVAY | 0,593  |
| B62 | HLA-B*15:02 | 699  | LGAENSVAY  | 0,5304 |
| B62 | HLA-B*15:02 | 896  | IPFAMQMAY  | 0,6693 |
| B62 | HLA-B*15:02 | 1054 | QSAPHGVPF  | 0,678  |
| B62 | HLA-B*15:02 | 1113 | QIITDNTF   | 0,6078 |
| B62 | HLA-B*15:05 | 192  | FVFKNIDGY  | 0,568  |
| B62 | HLA-B*15:05 | 240  | TLLALHRSY  | 0,5065 |
| B62 | HLA-B*15:05 | 413  | GQTGKIADY  | 0,5265 |
| B62 | HLA-B*15:05 | 497  | FQPTNGVGY  | 0,5981 |
| B62 | HLA-B*15:05 | 634  | RVYSTGSNVF | 0,5053 |
| B62 | HLA-B*15:05 | 687  | VASQSIAY   | 0,7516 |
| B62 | HLA-B*15:05 | 689  | SQSIAYTM   | 0,5439 |

|     |             |      |            |        |
|-----|-------------|------|------------|--------|
| B62 | HLA-B*15:05 | 880  | GTITSGWTF  | 0,603  |
| B62 | HLA-B*15:05 | 894  | LQIPFAMQM  | 0,5925 |
| B62 | HLA-B*15:05 | 1054 | QSAPHGVPF  | 0,588  |
| B62 | HLA-B*15:05 | 1113 | QIITDNTF   | 0,5456 |
| B62 | HLA-B*15:12 | 628  | QLTPTWRVY  | 0,5076 |
| B62 | HLA-B*15:12 | 634  | RVYSTGSNVF | 0,5866 |
| B62 | HLA-B*15:12 | 687  | VASQSIAY   | 0,588  |
| B62 | HLA-B*15:12 | 1054 | QSAPHGVPF  | 0,5578 |
| B62 | HLA-B*15:14 | 634  | RVYSTGSNVF | 0,5315 |
| B62 | HLA-B*15:15 | 192  | FVFKNIDGY  | 0,6152 |
| B62 | HLA-B*15:15 | 212  | LVRDLPQGF  | 0,6015 |
| B62 | HLA-B*15:15 | 240  | TLLALHRSY  | 0,5454 |
| B62 | HLA-B*15:15 | 366  | SVLYNSASF  | 0,5295 |
| B62 | HLA-B*15:15 | 628  | QLTPTWRVY  | 0,5711 |
| B62 | HLA-B*15:15 | 634  | RVYSTGSNVF | 0,5219 |
| B62 | HLA-B*15:15 | 686  | SVASQSIAY  | 0,5315 |
| B62 | HLA-B*15:15 | 687  | VASQSIAY   | 0,7424 |
| B62 | HLA-B*15:15 | 698  | SLGAENSVAY | 0,6339 |
| B62 | HLA-B*15:15 | 699  | LGAENSVAY  | 0,5063 |
| B62 | HLA-B*15:15 | 919  | NQKLIANQF  | 0,6734 |
| B62 | HLA-B*15:15 | 962  | LVKQLSSNF  | 0,5773 |
| B62 | HLA-B*15:15 | 1054 | QSAPHGVPF  | 0,6835 |
| B62 | HLA-B*15:15 | 1113 | QIITDNTF   | 0,6196 |
| B62 | HLA-B*15:19 | 628  | QLTPTWRVY  | 0,5076 |
| B62 | HLA-B*15:19 | 634  | RVYSTGSNVF | 0,5866 |
| B62 | HLA-B*15:19 | 687  | VASQSIAY   | 0,588  |
| B62 | HLA-B*15:19 | 1054 | QSAPHGVPF  | 0,5578 |
| B62 | HLA-B*15:20 | 192  | FVFKNIDGY  | 0,6015 |
| B62 | HLA-B*15:20 | 240  | TLLALHRSY  | 0,5374 |
| B62 | HLA-B*15:20 | 497  | FQPTNGVGY  | 0,5717 |
| B62 | HLA-B*15:20 | 628  | QLTPTWRVY  | 0,5008 |
| B62 | HLA-B*15:20 | 687  | VASQSIAY   | 0,764  |
| B62 | HLA-B*15:20 | 689  | SQSIIAYTM  | 0,525  |
| B62 | HLA-B*15:20 | 698  | SLGAENSVAY | 0,5119 |
| B62 | HLA-B*15:20 | 880  | GTITSGWTF  | 0,5777 |
| B62 | HLA-B*15:20 | 894  | LQIPFAMQM  | 0,5729 |
| B62 | HLA-B*15:20 | 1054 | QSAPHGVPF  | 0,5705 |
| B62 | HLA-B*15:20 | 1113 | QIITDNTF   | 0,55   |
| B62 | HLA-B*15:25 | 30   | NSFTRGVYY  | 0,5102 |
| B62 | HLA-B*15:25 | 35   | GVYYPDKVF  | 0,7166 |
| B62 | HLA-B*15:25 | 47   | VLHSTQDLF  | 0,5497 |
| B62 | HLA-B*15:25 | 152  | WMESEFRVY  | 0,5406 |
| B62 | HLA-B*15:25 | 192  | FVFKNIDGY  | 0,6774 |
| B62 | HLA-B*15:25 | 212  | LVRDLPQGF  | 0,6749 |
| B62 | HLA-B*15:25 | 240  | TLLALHRSY  | 0,7448 |
| B62 | HLA-B*15:25 | 261  | GAAAYVGY   | 0,5614 |
| B62 | HLA-B*15:25 | 366  | SVLYNSASF  | 0,6588 |
| B62 | HLA-B*15:25 | 413  | GQTGKIADY  | 0,6454 |
| B62 | HLA-B*15:25 | 497  | FQPTNGVGY  | 0,6173 |
| B62 | HLA-B*15:25 | 628  | QLTPTWRVY  | 0,7063 |



|     |             |      |            |        |
|-----|-------------|------|------------|--------|
| B62 | HLA-B*15:25 | 634  | RVYSTGSNVF | 0,8174 |
| B62 | HLA-B*15:25 | 686  | SVASQSIAY  | 0,5343 |
| B62 | HLA-B*15:25 | 687  | VASQSIAY   | 0,8425 |
| B62 | HLA-B*15:25 | 698  | SLGAENSVAY | 0,6499 |
| B62 | HLA-B*15:25 | 699  | LGAENSVAY  | 0,5125 |
| B62 | HLA-B*15:25 | 880  | GTITSGWTF  | 0,6109 |
| B62 | HLA-B*15:25 | 894  | LQIPFAMQM  | 0,6635 |
| B62 | HLA-B*15:25 | 962  | LVKQLSSNF  | 0,5897 |
| B62 | HLA-B*15:25 | 1000 | RLQSLQTY   | 0,5751 |
| B62 | HLA-B*15:25 | 1054 | QSAPHGVSF  | 0,6973 |
| B62 | HLA-B*15:25 | 1113 | QIITDNTF   | 0,6015 |
| B62 | HLA-B*15:25 | 1264 | VLKGVKLHY  | 0,8551 |
| B62 | HLA-B*15:28 | 35   | GVYYPDKVF  | 0,677  |
| B62 | HLA-B*15:28 | 47   | VLHSTQDLF  | 0,5635 |
| B62 | HLA-B*15:28 | 192  | FVFKNIDGY  | 0,678  |
| B62 | HLA-B*15:28 | 212  | LVRDLPQGF  | 0,7136 |
| B62 | HLA-B*15:28 | 240  | TLLALHRSY  | 0,6805 |
| B62 | HLA-B*15:28 | 258  | WTAGAAAYY  | 0,5072 |
| B62 | HLA-B*15:28 | 261  | GAAAYVGY   | 0,52   |
| B62 | HLA-B*15:28 | 366  | SVLYNSASF  | 0,5995 |
| B62 | HLA-B*15:28 | 413  | GQTGKIADY  | 0,764  |
| B62 | HLA-B*15:28 | 497  | FQPTNGVGY  | 0,7039 |
| B62 | HLA-B*15:28 | 628  | QLTPTWRVY  | 0,6565 |
| B62 | HLA-B*15:28 | 634  | RVYSTGSNVF | 0,8491 |
| B62 | HLA-B*15:28 | 686  | SVASQSIAY  | 0,5924 |
| B62 | HLA-B*15:28 | 687  | VASQSIAY   | 0,7822 |
| B62 | HLA-B*15:28 | 698  | SLGAENSVAY | 0,6839 |
| B62 | HLA-B*15:28 | 880  | GTITSGWTF  | 0,6048 |
| B62 | HLA-B*15:28 | 894  | LQIPFAMQM  | 0,6403 |
| B62 | HLA-B*15:28 | 919  | NQKLIANQF  | 0,7035 |
| B62 | HLA-B*15:28 | 962  | LVKQLSSNF  | 0,7084 |
| B62 | HLA-B*15:28 | 1000 | RLQSLQTY   | 0,5767 |
| B62 | HLA-B*15:28 | 1054 | QSAPHGVSF  | 0,7211 |
| B62 | HLA-B*15:28 | 1113 | QIITDNTF   | 0,6229 |
| B62 | HLA-B*15:28 | 1264 | VLKGVKLHY  | 0,8811 |
| B62 | HLA-B*15:31 | 84   | LPFNDGVYF  | 0,5604 |
| B62 | HLA-B*15:31 | 192  | FVFKNIDGY  | 0,5375 |
| B62 | HLA-B*15:31 | 687  | VASQSIAY   | 0,7264 |
| B62 | HLA-B*15:31 | 896  | IPFAMQMAY  | 0,5929 |
| B62 | HLA-B*15:31 | 1054 | QSAPHGVSF  | 0,5241 |
| B62 | HLA-B*15:31 | 1113 | QIITDNTF   | 0,5135 |
| B62 | HLA-B*15:33 | 35   | GVYYPDKVF  | 0,677  |
| B62 | HLA-B*15:33 | 47   | VLHSTQDLF  | 0,5635 |
| B62 | HLA-B*15:33 | 192  | FVFKNIDGY  | 0,678  |
| B62 | HLA-B*15:33 | 212  | LVRDLPQGF  | 0,7136 |
| B62 | HLA-B*15:33 | 240  | TLLALHRSY  | 0,6805 |
| B62 | HLA-B*15:33 | 258  | WTAGAAAYY  | 0,5072 |
| B62 | HLA-B*15:33 | 261  | GAAAYVGY   | 0,52   |
| B62 | HLA-B*15:33 | 366  | SVLYNSASF  | 0,5995 |
| B62 | HLA-B*15:33 | 413  | GQTGKIADY  | 0,764  |

|     |             |      |            |        |
|-----|-------------|------|------------|--------|
| B62 | HLA-B*15:33 | 497  | FQPTNGVGY  | 0,7039 |
| B62 | HLA-B*15:33 | 628  | QLTPTWRVY  | 0,6565 |
| B62 | HLA-B*15:33 | 634  | RVYSTGSNVF | 0,8491 |
| B62 | HLA-B*15:33 | 686  | SVASQSIIAY | 0,5924 |
| B62 | HLA-B*15:33 | 687  | VASQSIIAY  | 0,7822 |
| B62 | HLA-B*15:33 | 698  | SLGAENSVAY | 0,6839 |
| B62 | HLA-B*15:33 | 880  | GTITSGWTF  | 0,6048 |
| B62 | HLA-B*15:33 | 894  | LQIPFAMQM  | 0,6403 |
| B62 | HLA-B*15:33 | 919  | NQKLIANQF  | 0,7035 |
| B62 | HLA-B*15:33 | 962  | LVKQLSSNF  | 0,7084 |
| B62 | HLA-B*15:33 | 1000 | RLQSLQTY   | 0,5767 |
| B62 | HLA-B*15:33 | 1054 | QSAPHGVVF  | 0,7211 |
| B62 | HLA-B*15:33 | 1113 | QIITDNTF   | 0,6229 |
| B62 | HLA-B*15:33 | 1264 | VLKGVKLHY  | 0,8811 |
| B62 | HLA-B*15:34 | 35   | GVYYPDKVF  | 0,677  |
| B62 | HLA-B*15:34 | 47   | VLHSTQDLF  | 0,5635 |
| B62 | HLA-B*15:34 | 192  | FVFKNIDGY  | 0,678  |
| B62 | HLA-B*15:34 | 212  | LVRDLPQGF  | 0,7136 |
| B62 | HLA-B*15:34 | 240  | TLLALHRSY  | 0,6805 |
| B62 | HLA-B*15:34 | 258  | WTAGAAAYY  | 0,5072 |
| B62 | HLA-B*15:34 | 261  | GAAAYYVGY  | 0,52   |
| B62 | HLA-B*15:34 | 366  | SVLYNSASF  | 0,5995 |
| B62 | HLA-B*15:34 | 413  | GQTGKIADY  | 0,764  |
| B62 | HLA-B*15:34 | 497  | FQPTNGVGY  | 0,7039 |
| B62 | HLA-B*15:34 | 628  | QLTPTWRVY  | 0,6565 |
| B62 | HLA-B*15:34 | 634  | RVYSTGSNVF | 0,8491 |
| B62 | HLA-B*15:34 | 686  | SVASQSIIAY | 0,5924 |
| B62 | HLA-B*15:34 | 687  | VASQSIIAY  | 0,7822 |
| B62 | HLA-B*15:34 | 698  | SLGAENSVAY | 0,6839 |
| B62 | HLA-B*15:34 | 880  | GTITSGWTF  | 0,6048 |
| B62 | HLA-B*15:34 | 894  | LQIPFAMQM  | 0,6403 |
| B62 | HLA-B*15:34 | 919  | NQKLIANQF  | 0,7035 |
| B62 | HLA-B*15:34 | 962  | LVKQLSSNF  | 0,7084 |
| B62 | HLA-B*15:34 | 1000 | RLQSLQTY   | 0,5767 |
| B62 | HLA-B*15:34 | 1054 | QSAPHGVVF  | 0,7211 |
| B62 | HLA-B*15:34 | 1113 | QIITDNTF   | 0,6229 |
| B62 | HLA-B*15:34 | 1264 | VLKGVKLHY  | 0,8811 |
| B62 | HLA-B*15:38 | 30   | NSFTRGVYY  | 0,5586 |
| B62 | HLA-B*15:38 | 152  | WMESEFRVY  | 0,5815 |
| B62 | HLA-B*15:38 | 192  | FVFKNIDGY  | 0,6613 |
| B62 | HLA-B*15:38 | 212  | LVRDLPQGF  | 0,6736 |
| B62 | HLA-B*15:38 | 240  | TLLALHRSY  | 0,7304 |
| B62 | HLA-B*15:38 | 261  | GAAAYYVGY  | 0,5782 |
| B62 | HLA-B*15:38 | 366  | SVLYNSASF  | 0,5604 |
| B62 | HLA-B*15:38 | 413  | GQTGKIADY  | 0,7293 |
| B62 | HLA-B*15:38 | 464  | FERDISTEII | 0,5752 |
| B62 | HLA-B*15:38 | 497  | FQPTNGVGY  | 0,705  |
| B62 | HLA-B*15:38 | 628  | QLTPTWRVY  | 0,676  |
| B62 | HLA-B*15:38 | 634  | RVYSTGSNVF | 0,7511 |
| B62 | HLA-B*15:38 | 686  | SVASQSIIAY | 0,5671 |

|     |             |      |            |        |
|-----|-------------|------|------------|--------|
| B62 | HLA-B*15:38 | 687  | VASQSIAY   | 0,7799 |
| B62 | HLA-B*15:38 | 689  | SQSIAYTM   | 0,5356 |
| B62 | HLA-B*15:38 | 698  | SLGAENSVAY | 0,6347 |
| B62 | HLA-B*15:38 | 699  | LGAENSVAY  | 0,5322 |
| B62 | HLA-B*15:38 | 880  | GTITSGWTF  | 0,5811 |
| B62 | HLA-B*15:38 | 894  | LQIPFAMQM  | 0,6945 |
| B62 | HLA-B*15:38 | 919  | NQKLIANQF  | 0,8136 |
| B62 | HLA-B*15:38 | 962  | LVKQLSSNF  | 0,7271 |
| B62 | HLA-B*15:38 | 1000 | RLQSLQTY   | 0,5657 |
| B62 | HLA-B*15:38 | 1054 | QSAPHGVVF  | 0,711  |
| B62 | HLA-B*15:38 | 1113 | QIITDNTF   | 0,5803 |
| B62 | HLA-B*15:38 | 1264 | VLKGVKLHY  | 0,8714 |
| B62 | HLA-B*15:39 | 35   | GVYYPDKVF  | 0,7375 |
| B62 | HLA-B*15:39 | 47   | VLHSTQDLF  | 0,5828 |
| B62 | HLA-B*15:39 | 83   | VLPFNDGVYF | 0,5256 |
| B62 | HLA-B*15:39 | 152  | WMESEFRVY  | 0,5416 |
| B62 | HLA-B*15:39 | 192  | FVFKNIDGY  | 0,6491 |
| B62 | HLA-B*15:39 | 212  | LVRDLPQGF  | 0,6773 |
| B62 | HLA-B*15:39 | 240  | TLLALHRSY  | 0,7211 |
| B62 | HLA-B*15:39 | 261  | GAAAYVGY   | 0,5543 |
| B62 | HLA-B*15:39 | 366  | SVLYNSASF  | 0,6531 |
| B62 | HLA-B*15:39 | 413  | GQTGKIADY  | 0,6727 |
| B62 | HLA-B*15:39 | 497  | FQPTNGVGY  | 0,6539 |
| B62 | HLA-B*15:39 | 628  | QLTPTWRVY  | 0,6869 |
| B62 | HLA-B*15:39 | 634  | RVYSTGSNVF | 0,8327 |
| B62 | HLA-B*15:39 | 686  | SVASQSIAY  | 0,5034 |
| B62 | HLA-B*15:39 | 687  | VASQSIAY   | 0,8337 |
| B62 | HLA-B*15:39 | 689  | SQSIAYTM   | 0,5045 |
| B62 | HLA-B*15:39 | 698  | SLGAENSVAY | 0,6247 |
| B62 | HLA-B*15:39 | 699  | LGAENSVAY  | 0,5064 |
| B62 | HLA-B*15:39 | 815  | RSFIEDLLF  | 0,5266 |
| B62 | HLA-B*15:39 | 880  | GTITSGWTF  | 0,6421 |
| B62 | HLA-B*15:39 | 894  | LQIPFAMQM  | 0,6884 |
| B62 | HLA-B*15:39 | 919  | NQKLIANQF  | 0,5508 |
| B62 | HLA-B*15:39 | 962  | LVKQLSSNF  | 0,5971 |
| B62 | HLA-B*15:39 | 1000 | RLQSLQTY   | 0,582  |
| B62 | HLA-B*15:39 | 1054 | QSAPHGVVF  | 0,7223 |
| B62 | HLA-B*15:39 | 1113 | QIITDNTF   | 0,6116 |
| B62 | HLA-B*15:39 | 1264 | VLKGVKLHY  | 0,8466 |
| B62 | HLA-B*15:40 | 634  | RVYSTGSNVF | 0,6651 |
| B62 | HLA-B*15:40 | 687  | VASQSIAY   | 0,5923 |
| B62 | HLA-B*15:40 | 894  | LQIPFAMQM  | 0,564  |
| B62 | HLA-B*15:40 | 1264 | VLKGVKLHY  | 0,65   |
| B62 | HLA-B*15:50 | 192  | FVFKNIDGY  | 0,5522 |
| B62 | HLA-B*15:50 | 212  | LVRDLPQGF  | 0,5998 |
| B62 | HLA-B*15:50 | 240  | TLLALHRSY  | 0,595  |
| B62 | HLA-B*15:50 | 413  | GQTGKIADY  | 0,6557 |
| B62 | HLA-B*15:50 | 628  | QLTPTWRVY  | 0,567  |
| B62 | HLA-B*15:50 | 634  | RVYSTGSNVF | 0,7616 |
| B62 | HLA-B*15:50 | 687  | VASQSIAY   | 0,7011 |

|     |             |      |            |        |
|-----|-------------|------|------------|--------|
| B62 | HLA-B*15:50 | 698  | SLGAENSVAY | 0,5791 |
| B62 | HLA-B*15:50 | 880  | GTITSGWTF  | 0,5108 |
| B62 | HLA-B*15:50 | 894  | LQIPFAMQM  | 0,5936 |
| B62 | HLA-B*15:50 | 919  | NQKLIANQF  | 0,635  |
| B62 | HLA-B*15:50 | 962  | LVKQLSSNF  | 0,5684 |
| B62 | HLA-B*15:50 | 1000 | RLQSLQTY   | 0,504  |
| B62 | HLA-B*15:50 | 1054 | QSAPHGVSF  | 0,6031 |
| B62 | HLA-B*15:50 | 1264 | VLKGVKLHY  | 0,8458 |
| B62 | HLA-B*15:60 | 35   | GVYYPDKVF  | 0,677  |
| B62 | HLA-B*15:60 | 47   | VLHSTQDLF  | 0,5635 |
| B62 | HLA-B*15:60 | 192  | FVFKNIDGY  | 0,678  |
| B62 | HLA-B*15:60 | 212  | LVRDLPQGF  | 0,7136 |
| B62 | HLA-B*15:60 | 240  | TLLALHRSY  | 0,6805 |
| B62 | HLA-B*15:60 | 258  | WTAGAAAYY  | 0,5072 |
| B62 | HLA-B*15:60 | 261  | GAAAYYVGY  | 0,52   |
| B62 | HLA-B*15:60 | 366  | SVLYNSASF  | 0,5995 |
| B62 | HLA-B*15:60 | 413  | GQTGKIADY  | 0,764  |
| B62 | HLA-B*15:60 | 497  | FQPTNGVGY  | 0,7039 |
| B62 | HLA-B*15:60 | 628  | QLTPTWRVY  | 0,6565 |
| B62 | HLA-B*15:60 | 634  | RVYSTGSNVF | 0,8491 |
| B62 | HLA-B*15:60 | 686  | SVASQSIIAY | 0,5924 |
| B62 | HLA-B*15:60 | 687  | VASQSIIAY  | 0,7822 |
| B62 | HLA-B*15:60 | 698  | SLGAENSVAY | 0,6839 |
| B62 | HLA-B*15:60 | 880  | GTITSGWTF  | 0,6048 |
| B62 | HLA-B*15:60 | 894  | LQIPFAMQM  | 0,6403 |
| B62 | HLA-B*15:60 | 919  | NQKLIANQF  | 0,7035 |
| B62 | HLA-B*15:60 | 962  | LVKQLSSNF  | 0,7084 |
| B62 | HLA-B*15:60 | 1000 | RLQSLQTY   | 0,5767 |
| B62 | HLA-B*15:60 | 1054 | QSAPHGVSF  | 0,7211 |
| B62 | HLA-B*15:60 | 1113 | QIITDNTF   | 0,6229 |
| B62 | HLA-B*15:60 | 1264 | VLKGVKLHY  | 0,8811 |
| B62 | HLA-B*15:65 | 35   | GVYYPDKVF  | 0,5822 |
| B62 | HLA-B*15:65 | 47   | VLHSTQDLF  | 0,6073 |
| B62 | HLA-B*15:65 | 152  | WMESEFRVY  | 0,5864 |
| B62 | HLA-B*15:65 | 192  | FVFKNIDGY  | 0,5038 |
| B62 | HLA-B*15:65 | 212  | LVRDLPQGF  | 0,5359 |
| B62 | HLA-B*15:65 | 240  | TLLALHRSY  | 0,6159 |
| B62 | HLA-B*15:65 | 366  | SVLYNSASF  | 0,6187 |
| B62 | HLA-B*15:65 | 584  | ILDITPCSF  | 0,5073 |
| B62 | HLA-B*15:65 | 628  | QLTPTWRVY  | 0,6602 |
| B62 | HLA-B*15:65 | 634  | RVYSTGSNVF | 0,7599 |
| B62 | HLA-B*15:65 | 686  | SVASQSIIAY | 0,5527 |
| B62 | HLA-B*15:65 | 687  | VASQSIIAY  | 0,792  |
| B62 | HLA-B*15:65 | 698  | SLGAENSVAY | 0,6847 |
| B62 | HLA-B*15:65 | 880  | GTITSGWTF  | 0,5709 |
| B62 | HLA-B*15:65 | 1000 | RLQSLQTY   | 0,5594 |
| B62 | HLA-B*15:65 | 1054 | QSAPHGVSF  | 0,7159 |
| B62 | HLA-B*15:65 | 1113 | QIITDNTF   | 0,5676 |
| B62 | HLA-B*15:65 | 1264 | VLKGVKLHY  | 0,7435 |
| B62 | HLA-B*15:70 | 192  | FVFKNIDGY  | 0,5037 |

|     |             |      |            |        |
|-----|-------------|------|------------|--------|
| B62 | HLA-B*15:70 | 212  | LVRDLPQGF  | 0,5805 |
| B62 | HLA-B*15:70 | 413  | GQTGKIADY  | 0,5593 |
| B62 | HLA-B*15:70 | 634  | RVYSTGSNVF | 0,6634 |
| B62 | HLA-B*15:70 | 687  | VASQSIIAY  | 0,563  |
| B62 | HLA-B*15:70 | 962  | LVKQLSSNF  | 0,5026 |
| B62 | HLA-B*15:70 | 1054 | QSAPHGVSF  | 0,5214 |
| B62 | HLA-B*15:70 | 1264 | VLKGVKLHY  | 0,7409 |
| B62 | HLA-B*15:75 | 35   | GVVYPDKVF  | 0,6355 |
| B62 | HLA-B*15:75 | 47   | VLHSTQDLF  | 0,524  |
| B62 | HLA-B*15:75 | 192  | FVFKNIDGY  | 0,652  |
| B62 | HLA-B*15:75 | 212  | LVRDLPQGF  | 0,6707 |
| B62 | HLA-B*15:75 | 240  | TLLALHRSY  | 0,6492 |
| B62 | HLA-B*15:75 | 366  | SVLYNSASF  | 0,5638 |
| B62 | HLA-B*15:75 | 413  | GQTGKIADY  | 0,7207 |
| B62 | HLA-B*15:75 | 497  | FQPTNGVGY  | 0,656  |
| B62 | HLA-B*15:75 | 628  | QLTPTWRVY  | 0,6233 |
| B62 | HLA-B*15:75 | 634  | RVYSTGSNVF | 0,8275 |
| B62 | HLA-B*15:75 | 686  | SVASQSIIAY | 0,5578 |
| B62 | HLA-B*15:75 | 687  | VASQSIIAY  | 0,7575 |
| B62 | HLA-B*15:75 | 698  | SLGAENSVAY | 0,6521 |
| B62 | HLA-B*15:75 | 880  | GTITSGWTF  | 0,5821 |
| B62 | HLA-B*15:75 | 894  | LQIPFAMQM  | 0,6094 |
| B62 | HLA-B*15:75 | 919  | NQKLIANQF  | 0,6621 |
| B62 | HLA-B*15:75 | 962  | LVKQLSSNF  | 0,6585 |
| B62 | HLA-B*15:75 | 1000 | RLQSLQTY   | 0,533  |
| B62 | HLA-B*15:75 | 1054 | QSAPHGVSF  | 0,6833 |
| B62 | HLA-B*15:75 | 1113 | QIITDNTF   | 0,5867 |
| B62 | HLA-B*15:75 | 1264 | VLKGVKLHY  | 0,8622 |
| B62 | HLA-B*15:78 | 35   | GVVYPDKVF  | 0,677  |
| B62 | HLA-B*15:78 | 47   | VLHSTQDLF  | 0,5635 |
| B62 | HLA-B*15:78 | 192  | FVFKNIDGY  | 0,678  |
| B62 | HLA-B*15:78 | 212  | LVRDLPQGF  | 0,7136 |
| B62 | HLA-B*15:78 | 240  | TLLALHRSY  | 0,6805 |
| B62 | HLA-B*15:78 | 258  | WTAGAAAYY  | 0,5072 |
| B62 | HLA-B*15:78 | 261  | GAAAYVGY   | 0,52   |
| B62 | HLA-B*15:78 | 366  | SVLYNSASF  | 0,5995 |
| B62 | HLA-B*15:78 | 413  | GQTGKIADY  | 0,764  |
| B62 | HLA-B*15:78 | 497  | FQPTNGVGY  | 0,7039 |
| B62 | HLA-B*15:78 | 628  | QLTPTWRVY  | 0,6565 |
| B62 | HLA-B*15:78 | 634  | RVYSTGSNVF | 0,8491 |
| B62 | HLA-B*15:78 | 686  | SVASQSIIAY | 0,5924 |
| B62 | HLA-B*15:78 | 687  | VASQSIIAY  | 0,7822 |
| B62 | HLA-B*15:78 | 698  | SLGAENSVAY | 0,6839 |
| B62 | HLA-B*15:78 | 880  | GTITSGWTF  | 0,6048 |
| B62 | HLA-B*15:78 | 894  | LQIPFAMQM  | 0,6403 |
| B62 | HLA-B*15:78 | 919  | NQKLIANQF  | 0,7035 |
| B62 | HLA-B*15:78 | 962  | LVKQLSSNF  | 0,7084 |
| B62 | HLA-B*15:78 | 1000 | RLQSLQTY   | 0,5767 |
| B62 | HLA-B*15:78 | 1054 | QSAPHGVSF  | 0,7211 |
| B62 | HLA-B*15:78 | 1113 | QIITDNTF   | 0,6229 |

|     |             |      |            |        |
|-----|-------------|------|------------|--------|
| B62 | HLA-B*15:78 | 1264 | VLKGVKLHY  | 0,8811 |
| B62 | HLA-B*15:81 | 35   | GVYYPDKVF  | 0,677  |
| B62 | HLA-B*15:81 | 47   | VLHSTQDLF  | 0,5635 |
| B62 | HLA-B*15:81 | 192  | FVFKNIDGY  | 0,678  |
| B62 | HLA-B*15:81 | 212  | LVRDLPQGF  | 0,7136 |
| B62 | HLA-B*15:81 | 240  | TLLALHRSY  | 0,6805 |
| B62 | HLA-B*15:81 | 258  | WTAGAAAYY  | 0,5072 |
| B62 | HLA-B*15:81 | 261  | GAAAYYVGY  | 0,52   |
| B62 | HLA-B*15:81 | 366  | SVLYNSASF  | 0,5995 |
| B62 | HLA-B*15:81 | 413  | GQTGKIADY  | 0,764  |
| B62 | HLA-B*15:81 | 497  | FQPTNGVGY  | 0,7039 |
| B62 | HLA-B*15:81 | 628  | QLTPTWRVY  | 0,6565 |
| B62 | HLA-B*15:81 | 634  | RVYSTGSNVF | 0,8491 |
| B62 | HLA-B*15:81 | 686  | SVASQSIIAY | 0,5924 |
| B62 | HLA-B*15:81 | 687  | VASQSIIAY  | 0,7822 |
| B62 | HLA-B*15:81 | 698  | SLGAENSVAY | 0,6839 |
| B62 | HLA-B*15:81 | 880  | GTITSGWTF  | 0,6048 |
| B62 | HLA-B*15:81 | 894  | LQIPFAMQM  | 0,6403 |
| B62 | HLA-B*15:81 | 919  | NQKLIANQF  | 0,7035 |
| B62 | HLA-B*15:81 | 962  | LVKQLSSNF  | 0,7084 |
| B62 | HLA-B*15:81 | 1000 | RLQSLQTY   | 0,5767 |
| B62 | HLA-B*15:81 | 1054 | QSAPHGVPF  | 0,7211 |
| B62 | HLA-B*15:81 | 1113 | QIITDNTF   | 0,6229 |
| B62 | HLA-B*15:81 | 1264 | VLKGVKLHY  | 0,8811 |
| B62 | HLA-B*15:82 | 35   | GVYYPDKVF  | 0,677  |
| B62 | HLA-B*15:82 | 47   | VLHSTQDLF  | 0,5635 |
| B62 | HLA-B*15:82 | 192  | FVFKNIDGY  | 0,678  |
| B62 | HLA-B*15:82 | 212  | LVRDLPQGF  | 0,7136 |
| B62 | HLA-B*15:82 | 240  | TLLALHRSY  | 0,6805 |
| B62 | HLA-B*15:82 | 258  | WTAGAAAYY  | 0,5072 |
| B62 | HLA-B*15:82 | 261  | GAAAYYVGY  | 0,52   |
| B62 | HLA-B*15:82 | 366  | SVLYNSASF  | 0,5995 |
| B62 | HLA-B*15:82 | 413  | GQTGKIADY  | 0,764  |
| B62 | HLA-B*15:82 | 497  | FQPTNGVGY  | 0,7039 |
| B62 | HLA-B*15:82 | 628  | QLTPTWRVY  | 0,6565 |
| B62 | HLA-B*15:82 | 634  | RVYSTGSNVF | 0,8491 |
| B62 | HLA-B*15:82 | 686  | SVASQSIIAY | 0,5924 |
| B62 | HLA-B*15:82 | 687  | VASQSIIAY  | 0,7822 |
| B62 | HLA-B*15:82 | 698  | SLGAENSVAY | 0,6839 |
| B62 | HLA-B*15:82 | 880  | GTITSGWTF  | 0,6048 |
| B62 | HLA-B*15:82 | 894  | LQIPFAMQM  | 0,6403 |
| B62 | HLA-B*15:82 | 919  | NQKLIANQF  | 0,7035 |
| B62 | HLA-B*15:82 | 962  | LVKQLSSNF  | 0,7084 |
| B62 | HLA-B*15:82 | 1000 | RLQSLQTY   | 0,5767 |
| B62 | HLA-B*15:82 | 1054 | QSAPHGVPF  | 0,7211 |
| B62 | HLA-B*15:82 | 1113 | QIITDNTF   | 0,6229 |
| B62 | HLA-B*15:82 | 1264 | VLKGVKLHY  | 0,8811 |
| B62 | HLA-B*15:85 | 35   | GVYYPDKVF  | 0,6525 |
| B62 | HLA-B*15:85 | 47   | VLHSTQDLF  | 0,5234 |
| B62 | HLA-B*15:85 | 192  | FVFKNIDGY  | 0,6835 |

|     |             |      |            |        |
|-----|-------------|------|------------|--------|
| B62 | HLA-B*15:85 | 212  | LVRDLPQGF  | 0,6903 |
| B62 | HLA-B*15:85 | 240  | TLLALHRSY  | 0,6924 |
| B62 | HLA-B*15:85 | 258  | WTAGAAAYY  | 0,5057 |
| B62 | HLA-B*15:85 | 261  | GAAAYYVGY  | 0,5182 |
| B62 | HLA-B*15:85 | 366  | SVLYNSASF  | 0,5905 |
| B62 | HLA-B*15:85 | 413  | GQTGKIADY  | 0,7286 |
| B62 | HLA-B*15:85 | 497  | FQPTNGVGY  | 0,6701 |
| B62 | HLA-B*15:85 | 628  | QLTPTWRVY  | 0,6639 |
| B62 | HLA-B*15:85 | 634  | RVYSTGSNVF | 0,8172 |
| B62 | HLA-B*15:85 | 686  | SVASQSIIAY | 0,6057 |
| B62 | HLA-B*15:85 | 687  | VASQSIIAY  | 0,7768 |
| B62 | HLA-B*15:85 | 698  | SLGAENSVAY | 0,6849 |
| B62 | HLA-B*15:85 | 880  | GTITSGWTF  | 0,5734 |
| B62 | HLA-B*15:85 | 894  | LQIPFAMQM  | 0,5976 |
| B62 | HLA-B*15:85 | 919  | NQKLIANQF  | 0,6783 |
| B62 | HLA-B*15:85 | 962  | LVKQLSSNF  | 0,6864 |
| B62 | HLA-B*15:85 | 1000 | RLQSLQTY   | 0,5531 |
| B62 | HLA-B*15:85 | 1054 | QSAPHGVSF  | 0,6958 |
| B62 | HLA-B*15:85 | 1113 | QIITDNTF   | 0,608  |
| B62 | HLA-B*15:85 | 1264 | VLKGVKLHY  | 0,8756 |
| B62 | HLA-B*15:88 | 84   | LPFNDGVYF  | 0,5189 |
| B62 | HLA-B*15:88 | 192  | FVFKNIDGY  | 0,5876 |
| B62 | HLA-B*15:88 | 240  | TLLALHRSY  | 0,5087 |
| B62 | HLA-B*15:88 | 628  | QLTPTWRVY  | 0,53   |
| B62 | HLA-B*15:88 | 687  | VASQSIIAY  | 0,7704 |
| B62 | HLA-B*15:88 | 698  | SLGAENSVAY | 0,5239 |
| B62 | HLA-B*15:88 | 699  | LGAENSVAY  | 0,5042 |
| B62 | HLA-B*15:88 | 896  | IPFAMQMAY  | 0,6381 |
| B62 | HLA-B*15:88 | 1054 | QSAPHGVSF  | 0,5587 |
| B62 | HLA-B*15:88 | 1113 | QIITDNTF   | 0,5554 |
| B62 | HLA-B*15:92 | 35   | GVYYPDKVF  | 0,677  |
| B62 | HLA-B*15:92 | 47   | VLHSTQDLF  | 0,5635 |
| B62 | HLA-B*15:92 | 192  | FVFKNIDGY  | 0,678  |
| B62 | HLA-B*15:92 | 212  | LVRDLPQGF  | 0,7136 |
| B62 | HLA-B*15:92 | 240  | TLLALHRSY  | 0,6805 |
| B62 | HLA-B*15:92 | 258  | WTAGAAAYY  | 0,5072 |
| B62 | HLA-B*15:92 | 261  | GAAAYYVGY  | 0,52   |
| B62 | HLA-B*15:92 | 366  | SVLYNSASF  | 0,5995 |
| B62 | HLA-B*15:92 | 413  | GQTGKIADY  | 0,764  |
| B62 | HLA-B*15:92 | 497  | FQPTNGVGY  | 0,7039 |
| B62 | HLA-B*15:92 | 628  | QLTPTWRVY  | 0,6565 |
| B62 | HLA-B*15:92 | 634  | RVYSTGSNVF | 0,8491 |
| B62 | HLA-B*15:92 | 686  | SVASQSIIAY | 0,5924 |
| B62 | HLA-B*15:92 | 687  | VASQSIIAY  | 0,7822 |
| B62 | HLA-B*15:92 | 698  | SLGAENSVAY | 0,6839 |
| B62 | HLA-B*15:92 | 880  | GTITSGWTF  | 0,6048 |
| B62 | HLA-B*15:92 | 894  | LQIPFAMQM  | 0,6403 |
| B62 | HLA-B*15:92 | 919  | NQKLIANQF  | 0,7035 |
| B62 | HLA-B*15:92 | 962  | LVKQLSSNF  | 0,7084 |
| B62 | HLA-B*15:92 | 1000 | RLQSLQTY   | 0,5767 |

|     |             |      |            |        |
|-----|-------------|------|------------|--------|
| B62 | HLA-B*15:92 | 1054 | QSAPHGVPF  | 0,7211 |
| B62 | HLA-B*15:92 | 1113 | QIITDNTF   | 0,6229 |
| B62 | HLA-B*15:92 | 1264 | VLKGVKLHY  | 0,8811 |
| B62 | HLA-B*15:96 | 35   | GVVYPDKVF  | 0,677  |
| B62 | HLA-B*15:96 | 47   | VLHSTQDLF  | 0,5635 |
| B62 | HLA-B*15:96 | 192  | FVFKNIDGY  | 0,678  |
| B62 | HLA-B*15:96 | 212  | LVRDLPQGF  | 0,7136 |
| B62 | HLA-B*15:96 | 240  | TLLALHRSY  | 0,6805 |
| B62 | HLA-B*15:96 | 258  | WTAGAAAYY  | 0,5072 |
| B62 | HLA-B*15:96 | 261  | GAAAYVGY   | 0,52   |
| B62 | HLA-B*15:96 | 366  | SVLYNSASF  | 0,5995 |
| B62 | HLA-B*15:96 | 413  | GQTGKIADY  | 0,764  |
| B62 | HLA-B*15:96 | 497  | FQPTNGVGY  | 0,7039 |
| B62 | HLA-B*15:96 | 628  | QLTPTWRVY  | 0,6565 |
| B62 | HLA-B*15:96 | 634  | RVYSTGSNVF | 0,8491 |
| B62 | HLA-B*15:96 | 686  | SVASQSIIAY | 0,5924 |
| B62 | HLA-B*15:96 | 687  | VASQSIIAY  | 0,7822 |
| B62 | HLA-B*15:96 | 698  | SLGAENSVAY | 0,6839 |
| B62 | HLA-B*15:96 | 880  | GTITSGWTF  | 0,6048 |
| B62 | HLA-B*15:96 | 894  | LQIPFAMQM  | 0,6403 |
| B62 | HLA-B*15:96 | 919  | NQKLIANQF  | 0,7035 |
| B62 | HLA-B*15:96 | 962  | LVKQLSSNF  | 0,7084 |
| B62 | HLA-B*15:96 | 1000 | RLQSLQTY   | 0,5767 |
| B62 | HLA-B*15:96 | 1054 | QSAPHGVPF  | 0,7211 |
| B62 | HLA-B*15:96 | 1113 | QIITDNTF   | 0,6229 |
| B62 | HLA-B*15:96 | 1264 | VLKGVKLHY  | 0,8811 |
| B62 | HLA-B*15:97 | 35   | GVVYPDKVF  | 0,677  |
| B62 | HLA-B*15:97 | 47   | VLHSTQDLF  | 0,5635 |
| B62 | HLA-B*15:97 | 192  | FVFKNIDGY  | 0,678  |
| B62 | HLA-B*15:97 | 212  | LVRDLPQGF  | 0,7136 |
| B62 | HLA-B*15:97 | 240  | TLLALHRSY  | 0,6805 |
| B62 | HLA-B*15:97 | 258  | WTAGAAAYY  | 0,5072 |
| B62 | HLA-B*15:97 | 261  | GAAAYVGY   | 0,52   |
| B62 | HLA-B*15:97 | 366  | SVLYNSASF  | 0,5995 |
| B62 | HLA-B*15:97 | 413  | GQTGKIADY  | 0,764  |
| B62 | HLA-B*15:97 | 497  | FQPTNGVGY  | 0,7039 |
| B62 | HLA-B*15:97 | 628  | QLTPTWRVY  | 0,6565 |
| B62 | HLA-B*15:97 | 634  | RVYSTGSNVF | 0,8491 |
| B62 | HLA-B*15:97 | 686  | SVASQSIIAY | 0,5924 |
| B62 | HLA-B*15:97 | 687  | VASQSIIAY  | 0,7822 |
| B62 | HLA-B*15:97 | 698  | SLGAENSVAY | 0,6839 |
| B62 | HLA-B*15:97 | 880  | GTITSGWTF  | 0,6048 |
| B62 | HLA-B*15:97 | 894  | LQIPFAMQM  | 0,6403 |
| B62 | HLA-B*15:97 | 919  | NQKLIANQF  | 0,7035 |
| B62 | HLA-B*15:97 | 962  | LVKQLSSNF  | 0,7084 |
| B62 | HLA-B*15:97 | 1000 | RLQSLQTY   | 0,5767 |
| B62 | HLA-B*15:97 | 1054 | QSAPHGVPF  | 0,7211 |
| B62 | HLA-B*15:97 | 1113 | QIITDNTF   | 0,6229 |
| B62 | HLA-B*15:97 | 1264 | VLKGVKLHY  | 0,8811 |
| B62 | HLA-B*35:28 | 192  | FVFKNIDGY  | 0,6199 |



|     |             |      |           |        |
|-----|-------------|------|-----------|--------|
| B62 | HLA-B*35:28 | 240  | TLLALHRSY | 0,5051 |
| B62 | HLA-B*35:28 | 261  | GAAAYVVG  | 0,5209 |
| B62 | HLA-B*35:28 | 339  | GEVFNATRF | 0,6317 |
| B62 | HLA-B*35:28 | 413  | GQTGKIADY | 0,5514 |
| B62 | HLA-B*35:28 | 443  | SKVGGNYNY | 0,6002 |
| B62 | HLA-B*35:28 | 464  | FERDISTEY | 0,5471 |
| B62 | HLA-B*35:28 | 497  | FQPTNGVGY | 0,6463 |
| B62 | HLA-B*35:28 | 687  | VASQSIAY  | 0,7882 |
| B62 | HLA-B*35:28 | 689  | SQSIAYTM  | 0,6456 |
| B62 | HLA-B*35:28 | 699  | LGAENSVAY | 0,546  |
| B62 | HLA-B*35:28 | 815  | RSFIEDLLF | 0,5236 |
| B62 | HLA-B*35:28 | 880  | GTITSGWTF | 0,5709 |
| B62 | HLA-B*35:28 | 894  | LQIPFAMQM | 0,7173 |
| B62 | HLA-B*35:28 | 919  | NQKLIANQF | 0,5854 |
| B62 | HLA-B*35:28 | 1054 | QSAPHGVVF | 0,6134 |
| B62 | HLA-B*35:28 | 1113 | QIITDNTF  | 0,5096 |
| B62 | HLA-B*52:01 | 712  | IAIPTNFTI | 0,7144 |
| B62 | HLA-B*52:02 | 712  | IAIPTNFTI | 0,7268 |
| B62 | HLA-B*52:03 | 712  | IAIPTNFTI | 0,7225 |
| B62 | HLA-B*52:04 | 712  | IAIPTNFTI | 0,7144 |
| B62 | HLA-B*52:05 | 712  | IAIPTNFTI | 0,7144 |
| B62 | HLA-B*52:07 | 712  | IAIPTNFTI | 0,7144 |

Note: The epitopes mutated in Omicron variant versus Wuhan-1 are indicated in red.
