# Supplementary material for: Predicted HLA Class I and Class II Epitopes From Licensed Vaccines Are Largely Conserved in New SARS-CoV-2 Omicron Variant of Concern
Source: PubMed Central journal article supplement (PMC8831693; doi:10.3389/fimmu.2022.832889), 2022-01-28
Supplement: DataSheet_2.pdf [file DataSheet_2.pdf]

# Allele: DRB1\_0101

| Pos  | MHC       | Peptide         | Of | Core      | Core_Rel | Score_EL |
|------|-----------|-----------------|----|-----------|----------|----------|
| 540  | DRB1_0101 | NFNFNGLTGTGVLTE | 3  | FNGLTGTGV | 1.000    | 0.938016 |
| 512  | DRB1_0101 | VLSFELLHAPATVCG | 3  | FELLHAPAT | 0.967    | 0.811818 |
| 314  | DRB1_0101 | QTSNFRVQPTESIVR | 4  | FRVQPTESI | 1.000    | 0.781642 |
| 492  | DRB1_0101 | LQSYGFQPTNGVGYQ | 3  | YGFQPTNGV | 0.993    | 0.718623 |
| 514  | DRB1_0101 | SFELLHAPATVCGPK | 3  | LLHAPATVC | 0.927    | 0.717202 |
| 303  | DRB1_0101 | LKSFTVEKGIYQTSN | 3  | FTVEKGIYQ | 1.000    | 0.709921 |
| 1057 | DRB1_0101 | PHGVVFLHVTYVPAQ | 3  | VVFLHVTYV | 0.993    | 0.692500 |
| 197  | DRB1_0101 | IDGYFKIYSKHTPIN | 3  | YFKIYSKHT | 1.000    | 0.607851 |

# Allele: DRB1\_0401

| Pos  | MHC       | Peptide         | Of | Core      | Core_Rel | Score_EL |
|------|-----------|-----------------|----|-----------|----------|----------|
| 33   | DRB1_0401 | TRGVYYPDKVFRSSV | 4  | YYPDKVFRS | 1.000    | 0.905995 |
| 314  | DRB1_0401 | QTSNFRVQPTESIVR | 4  | FRVQPTESI | 1.000    | 0.898292 |
| 1111 | DRB1_0401 | EPQIITTDNTFVSGN | 4  | ITTDNTFVS | 0.927    | 0.821410 |
| 802  | DRB1_0401 | FSQILPDPSKPSKRS | 3  | ILPDPSKPS | 1.000    | 0.819922 |
| 1014 | DRB1_0401 | RAAEIRASANLAATK | 4  | IRASANLAA | 1.000    | 0.802608 |
| 492  | DRB1_0401 | LQSYGFQPTNGVGYQ | 3  | YGFQPTNGV | 1.000    | 0.759073 |
| 86   | DRB1_0401 | FNDGVYFASTEKSNI | 4  | VYFASTEKS | 1.000    | 0.749776 |
| 362  | DRB1_0401 | VADYSVLYNSASFST | 3  | YSVLYNSAS | 1.000    | 0.665981 |
| 303  | DRB1_0401 | LKSFTVEKGIYQTSN | 3  | FTVEKGIYQ | 1.000    | 0.587244 |
| 1099 | DRB1_0401 | GTHWFVTQRNFYEPQ | 4  | FVTQRNFYE | 0.987    | 0.556554 |
| 207  | DRB1_0401 | HTPINLVRDLPOGFS | 3  | INLVRDLPO | 0.993    | 0.522253 |

# Allele: DRB1\_0404

| Pos  | MHC       | Peptide          | Of | Core      | Core_Rel | Score_EL |
|------|-----------|------------------|----|-----------|----------|----------|
| 207  | DRB1_0404 | HTPINLVRDLPOGFS  | 3  | INLVRDLPO | 1.000    | 0.953780 |
| 1014 | DRB1_0404 | RAAEIRASANLAATK  | 4  | IRASANLAA | 1.000    | 0.923993 |
| 232  | DRB1_0404 | GINITRFQTLALHR   | 3  | ITRFQTLA  | 1.000    | 0.895299 |
| 86   | DRB1_0404 | FNDGVYFASTEKSNI  | 4  | VYFASTEKS | 1.000    | 0.852579 |
| 928  | DRB1_0404 | NSAIGKIQDLSSTA   | 3  | IGKIQDLS  | 1.000    | 0.848992 |
| 960  | DRB1_0404 | NTLVKQLSSNFGAIS  | 3  | VKQLSSNFG | 1.000    | 0.812821 |
| 1111 | DRB1_0404 | EPQIITTDNTFVSGN  | 4  | ITTDNTFVS | 0.720    | 0.761306 |
| 802  | DRB1_0404 | FSQILPDPSKPSKRS  | 3  | ILPDPSKPS | 1.000    | 0.723057 |
| 944  | DRB1_0404 | ALGKQLQDVVNQNAQA | 4  | LQDVVNQNA | 1.000    | 0.668202 |

|      |           |                  |   |            |       |          |
|------|-----------|------------------|---|------------|-------|----------|
| 702  | DRB1_0404 | ENSVAYSNNNSIAIPT | 3 | VAYSNNNSIA | 1.000 | 0.663927 |
| 323  | DRB1_0404 | TESIVRFPNITNLCP  | 3 | IVRFPNITN  | 1.000 | 0.655964 |
| 690  | DRB1_0404 | QSIIAYTMSLGAENS  | 3 | IAYTMSLGA  | 0.973 | 0.638258 |
| 113  | DRB1_0404 | KTQSLLVNNTATNVV  | 4 | LLIVNNATN  | 0.993 | 0.614084 |
| 300  | DRB1_0404 | KCTLKSFTVEKGIYQ  | 3 | LKSFTVEKG  | 1.000 | 0.600123 |
| 767  | DRB1_0404 | LTGIAVEQDKNTQEV  | 3 | IAVEQDKNT  | 0.967 | 0.597703 |
| 1126 | DRB1_0404 | CDVVIGIVNNTVYDP  | 3 | VIGIVNNTV  | 0.800 | 0.589583 |

# Allele: DRB1\_0701

| Pos  | MHC       | Peptide          | Of | Core      | Core_Rel | Score_EL |
|------|-----------|------------------|----|-----------|----------|----------|
| 309  | DRB1_0701 | EKGIYQTSNFRVQPT  | 3  | IYQTSNFRV | 1.000    | 0.912889 |
| 714  | DRB1_0701 | IPTNFTISVTTEILP  | 4  | FTISVTTEI | 1.000    | 0.896225 |
| 494  | DRB1_0701 | SYGFQPTNGVGYQPY  | 3  | FQPTNGVGY | 1.000    | 0.821964 |
| 632  | DRB1_0701 | TWRVYSTGSNVVFQTR | 3  | VYSTGSNVF | 1.000    | 0.716526 |
| 690  | DRB1_0701 | QSIIAYTMSLGAENS  | 3  | IAYTMSLGA | 0.973    | 0.681335 |
| 1153 | DRB1_0701 | DKYFKNHTSPDVDLG  | 3  | FKNHTSPDV | 0.973    | 0.639460 |
| 25   | DRB1_0701 | PPAYTNSFTRGVYYP  | 3  | YTNSFTRGV | 1.000    | 0.637973 |
| 1111 | DRB1_0701 | EPQIITTDNTFVSGN  | 3  | IITTDNTFV | 0.993    | 0.568150 |
| 201  | DRB1_0701 | FKIYSKHTPINLVRD  | 3  | YSKHTPINL | 0.960    | 0.531197 |
| 681  | DRB1_0701 | PRRARSVASQSIIAY  | 3  | ARSVASQSI | 0.993    | 0.524826 |
| 797  | DRB1_0701 | FGGFNFSQILPDPSK  | 3  | FNFSQILPD | 0.960    | 0.476780 |

# Allele: DRB1\_0802

| Pos  | MHC       | Peptide         | Of | Core      | Core_Rel | Score_EL |
|------|-----------|-----------------|----|-----------|----------|----------|
| 1014 | DRB1_0802 | RAAEIRASANLAATK | 4  | IRASANLAA | 0.960    | 0.603367 |
| 61   | DRB1_0802 | NVTWFHAIHVSGTNG | 3  | WFHAIHVSG | 0.480    | 0.553878 |
| 272  | DRB1_0802 | PRTFLLKYNENGTIT | 3  | FLLKYNENG | 0.993    | 0.546261 |
| 1009 | DRB1_0802 | TQQLIRAAEIRASAN | 4  | IRAAEIRAS | 0.567    | 0.534196 |
| 446  | DRB1_0802 | GGNYNYLYRLFRKSN | 3  | YNYLYRLFR | 0.940    | 0.524253 |
| 978  | DRB1_0802 | NDILSRLDKVEAEVQ | 3  | LSRLDKVEA | 0.980    | 0.523589 |

# Allele: DRB1\_0901

| Pos | MHC       | Peptide         | Of | Core      | Core_Rel | Score_EL |
|-----|-----------|-----------------|----|-----------|----------|----------|
| 714 | DRB1_0901 | IPTNFTISVTTEILP | 4  | FTISVTTEI | 1.000    | 0.845552 |

|      |           |                  |   |                  |       |          |
|------|-----------|------------------|---|------------------|-------|----------|
| 883  | DRB1_0901 | TSGWTFGAGAAALQIP | 3 | WTFGAGAAL        | 0.553 | 0.780244 |
| 885  | DRB1_0901 | GWTFGAGAAALQIPFA | 3 | FGAGAAALQI       | 0.953 | 0.722468 |
| 25   | DRB1_0901 | PPAYTNSFTRGVVYP  | 3 | YTNSFTRGV        | 0.987 | 0.656755 |
| 493  | DRB1_0901 | QSYGFQPTNGVGYQP  | 4 | FQPTNGVGY        | 0.793 | 0.655929 |
| 255  | DRB1_0901 | SSGWTAGAAAYYVGY  | 3 | WTAGAAAYY        | 0.907 | 0.629042 |
| 309  | DRB1_0901 | EKGIYQTSNFRVQPT  | 3 | IYQTSNFRV        | 0.967 | 0.618192 |
| 690  | DRB1_0901 | QSIIAYTMSLGAENS  | 3 | IAYTMSLGA        | 0.640 | 0.586207 |
| 923  | DRB1_0901 | IANQFNSAIGKIQDS  | 4 | FNSAIGKIQ        | 0.980 | 0.565579 |
| 797  | DRB1_0901 | FGGFNFSQILPDPSK  | 3 | FNFSQILPD        | 0.913 | 0.550854 |
| 60   | DRB1_0901 | SNVTFWHAIHVSGTN  | 2 | VTWFHAIHV        | 0.427 | 0.538172 |
| 540  | DRB1_0901 | NFNENGLTGTGVLTE  | 3 | <b>FNGLTGTGV</b> | 1.000 | 0.538096 |
| 1064 | DRB1_0901 | HVTYVPAQEKNFTTA  | 3 | YVPAQEKNF        | 0.993 | 0.533012 |
| 87   | DRB1_0901 | NDGVYFASTEKSNII  | 4 | YFASTEKSN        | 0.460 | 0.520388 |

# Allele: DRB1\_1001

| Pos  | MHC       | Peptide         | Of | Core      | Core_Rel | Score_EL |
|------|-----------|-----------------|----|-----------|----------|----------|
| 1135 | DRB1_1001 | NTVYDPLQPELDSFK | 3  | YDPLQPELD | 1.000    | 0.890783 |
| 216  | DRB1_1001 | LPQGFSALEPLVDLP | 4  | FSALEPLVD | 1.000    | 0.879496 |
| 966  | DRB1_1001 | LSSNFGAISSVLNDI | 4  | FGAISSVLN | 1.000    | 0.855589 |
| 314  | DRB1_1001 | QTSNFRVQPTESIVR | 4  | FRVQPTESI | 1.000    | 0.787133 |
| 799  | DRB1_1001 | GFNFSQILPDPSKPS | 3  | FSQILPDPS | 0.980    | 0.731931 |
| 362  | DRB1_1001 | VADYSVLYNSASFST | 3  | YSVLYNSAS | 0.980    | 0.708692 |
| 62   | DRB1_1001 | VTWFHAIHVSGTNGT | 3  | FHAIHVSGT | 0.973    | 0.698477 |
| 492  | DRB1_1001 | LQSYGFQPTNGVGYQ | 3  | YGFQPTNGV | 0.987    | 0.626730 |
| 87   | DRB1_1001 | NDGVYFASTEKSNII | 3  | VYFASTEKS | 0.867    | 0.623790 |
| 692  | DRB1_1001 | IIAYTMSLGAENSVA | 3  | YTMSLGAEN | 0.993    | 0.616190 |
| 303  | DRB1_1001 | LKSFTVEKGIYQTSN | 3  | FTVEKGIYQ | 1.000    | 0.608513 |
| 512  | DRB1_1001 | VLSFELLHAPATVCG | 3  | FELLHAPAT | 0.953    | 0.597462 |

# Allele: DRB1\_1101

| Pos | MHC       | Peptide          | Of | Core       | Core_Rel | Score_EL |
|-----|-----------|------------------|----|------------|----------|----------|
| 978 | DRB1_1101 | NDILSRLDKVEAEVQ  | 3  | LSRLDKVEA  | 1.000    | 0.806222 |
| 955 | DRB1_1101 | NAQALNTLVKQLSSN  | 4  | LNTLVKQLS  | 1.000    | 0.741440 |
| 446 | DRB1_1101 | GGNYNYLYRLLFRKSN | 3  | YNYLYRLLFR | 1.000    | 0.722800 |

## # Allele: DRB1\_1302

| Pos  | MHC       | Peptide          | Of | Core      | Core_Rel | Score_EL |
|------|-----------|------------------|----|-----------|----------|----------|
| 115  | DRB1_1302 | QSLIVNATNVVVIK   | 3  | LIVNATNV  | 0.507    | 0.768378 |
| 116  | DRB1_1302 | SLLIVNATNVVVIK   | 3  | IVNATNVV  | 0.740    | 0.722566 |
| 309  | DRB1_1302 | EKGIYQTSNFRVQPT  | 3  | IYQTSNFRV | 1.000    | 0.682084 |
| 1014 | DRB1_1302 | RAAEIRASANLAATK  | 4  | IRASANLAA | 0.993    | 0.615121 |
| 1092 | DRB1_1302 | EGVVFVSNQTHWFVTQ | 3  | FVSNQTHWF | 0.987    | 0.606284 |
| 912  | DRB1_1302 | TQNVLYENQKLIANQ  | 4  | LYENQKLI  | 0.713    | 0.583838 |
| 818  | DRB1_1302 | IEDLLFNKVTLADAG  | 3  | LLFNKVTL  | 0.967    | 0.583772 |
| 274  | DRB1_1302 | TFLLKYNENGTITDA  | 3  | LKYNENGTI | 0.973    | 0.582775 |
| 802  | DRB1_1302 | FSQILPDPSPKSKRS  | 3  | ILPDPSPKS | 1.000    | 0.538356 |
| 314  | DRB1_1302 | QTSNFRVQPTESIVR  | 4  | FRVQPTESI | 0.987    | 0.535912 |
| 1111 | DRB1_1302 | EPQIITTDNTFVSGN  | 3  | IITTDNTFV | 0.627    | 0.526440 |
| 430  | DRB1_1302 | TGCVIAWNSNNLDSK  | 4  | IAWNSNNLD | 0.493    | 0.517543 |
| 778  | DRB1_1302 | TQEVFAQVKQIYKTP  | 3  | VFAQVKQIY | 0.893    | 0.501246 |
| 1099 | DRB1_1302 | GTHWFVTQRNFYEPQ  | 3  | WFVTQRNFY | 0.853    | 0.472552 |
| 346  | DRB1_1302 | RFASVYAWNRKRISN  | 4  | VYAWNRKRI | 0.507    | 0.450526 |
| 1153 | DRB1_1302 | DKYFKNHTSPDVLG   | 3  | FKNHTSPDV | 0.753    | 0.443493 |
| 919  | DRB1_1302 | NQKLIANQFNSAIGK  | 3  | LIANQFNSA | 0.740    | 0.438946 |
| 142  | DRB1_1302 | GVYYHKNNKSWMESE  | 3  | YHKNNKSWM | 0.913    | 0.437505 |
| 33   | DRB1_1302 | TRGVYYPDKVFRSSV  | 4  | YYPDKVFRS | 0.933    | 0.425745 |
| 947  | DRB1_1302 | KLQDVVNQNAQALNT  | 4  | VVNQNAQAL | 0.707    | 0.425418 |

## # Allele: DRB1\_1501

| Pos  | MHC       | Peptide         | Of | Core      | Core_Rel | Score_EL |
|------|-----------|-----------------|----|-----------|----------|----------|
| 867  | DRB1_1501 | DEMIAQYTSALLAGT | 3  | IAQYTSALL | 1.000    | 0.989184 |
| 430  | DRB1_1501 | TGCVIAWNSNNLDSK | 3  | VIAWNSNNL | 1.000    | 0.966005 |
| 309  | DRB1_1501 | EKGIYQTSNFRVQPT | 3  | IYQTSNFRV | 1.000    | 0.922581 |
| 232  | DRB1_1501 | GINITRFQTLALHR  | 3  | ITRFQTLA  | 1.000    | 0.857700 |
| 59   | DRB1_1501 | FSNVTWFHAIHVSQT | 3  | VTWFHAIHV | 1.000    | 0.835947 |
| 1001 | DRB1_1501 | LQSLQTYVTQQLIRA | 3  | LQTYVTQQL | 1.000    | 0.820364 |
| 790  | DRB1_1501 | KTPPIKDFGGFNFSQ | 4  | IKDFGGFNF | 1.000    | 0.818158 |
| 323  | DRB1_1501 | TESIVRFPNITNLCP | 3  | IVRFPNITN | 1.000    | 0.796209 |
| 831  | DRB1_1501 | AGFIKQYGDCLGDIA | 3  | IKQYGDCLG | 1.000    | 0.567814 |
| 1014 | DRB1_1501 | RAAEIRASANLAATK | 4  | IRASANLAA | 1.000    | 0.559269 |
| 1126 | DRB1_1501 | CDVVIGIVNNTVYDP | 3  | VIGIVNNTV | 0.847    | 0.540038 |
| 689  | DRB1_1501 | SQSIIAYTMSLGAEN | 3  | IIAYTMSLG | 0.813    | 0.533005 |
| 239  | DRB1_1501 | QTLALHRSYLTTPGD | 3  | LALHRSYLT | 0.967    | 0.526434 |

911 DRB1\_1501 VTQNVLYENQKLIAN 3 NVLYENQKL 0.973 0.468846

# Allele: DRB1\_1602

| Pos  | MHC       | Peptide         | Of | Core      | Core_Rel | Score_EL |
|------|-----------|-----------------|----|-----------|----------|----------|
| 867  | DRB1_1602 | DEMIAQYTSALLAGT | 3  | IAQYTSALL | 1.000    | 0.825191 |
| 309  | DRB1_1602 | EKGIYQTSNFRVQPT | 3  | IYQTSNFRV | 1.000    | 0.776902 |
| 430  | DRB1_1602 | TGCVIAWNSNNLDSK | 3  | VIAWNSNNL | 0.973    | 0.679206 |
| 314  | DRB1_1602 | QTSNFRVQPTESIVR | 4  | FRVQPTESI | 1.000    | 0.643355 |
| 1153 | DRB1_1602 | DKYFKNHTSPDVDLG | 3  | FKNHTSPDV | 0.933    | 0.587700 |
| 59   | DRB1_1602 | FSNVTWFHAIHVSGT | 3  | VTWFHAIHV | 0.987    | 0.573085 |
| 343  | DRB1_1602 | NATRFASVYAWNRRK | 4  | FASVYAWNR | 0.993    | 0.552323 |
| 197  | DRB1_1602 | IDGYFKIYSKHTPIN | 3  | YFKIYSKHT | 0.907    | 0.540575 |
| 153  | DRB1_1602 | MESEFRVYSSANNCT | 4  | FRVYSSANN | 1.000    | 0.534802 |
| 232  | DRB1_1602 | GINITRFQTLALHR  | 3  | ITRFQTLA  | 0.973    | 0.528208 |
| 1111 | DRB1_1602 | EPQIITDNTFVSGN  | 3  | IITDNTFV  | 0.920    | 0.490496 |
| 556  | DRB1_1602 | NKKFLPFQQFGRDIA | 3  | FLPFQQFGR | 0.987    | 0.480254 |
| 502  | DRB1_1602 | GVGYQPYRVVLSFE  | 3  | YQPYRVVVL | 1.000    | 0.473389 |
| 790  | DRB1_1602 | KTPPIKDFGGFNFSQ | 4  | IKDFGGFNF | 1.000    | 0.458410 |

# Allele: DRB3\_0301

| Pos  | MHC       | Peptide          | Of | Core       | Core_Rel | Score_EL |
|------|-----------|------------------|----|------------|----------|----------|
| 115  | DRB3_0301 | QSLLVNNTATNVVVIK | 4  | IVNNTATNVV | 0.493    | 0.717182 |
| 1111 | DRB3_0301 | EPQIITDNTFVSGN   | 3  | IITDNTFV   | 0.640    | 0.667030 |
| 114  | DRB3_0301 | TQSLLVNNTATNVVVI | 4  | LIVNNTATNV | 0.533    | 0.638262 |
| 1014 | DRB3_0301 | RAAEIRASANLAATK  | 4  | IRASANLAA  | 0.987    | 0.626741 |
| 309  | DRB3_0301 | EKGIYQTSNFRVQPT  | 3  | IYQTSNFRV  | 1.000    | 0.622539 |
| 818  | DRB3_0301 | IEDLLFNKVTLADAG  | 3  | LLFNKVTLA  | 0.993    | 0.607752 |
| 274  | DRB3_0301 | TFLLKYNENGTITDA  | 3  | LKYNENGTI  | 0.927    | 0.579236 |
| 802  | DRB3_0301 | FSQILPDPSPSKRS   | 3  | ILPDPSPKS  | 1.000    | 0.573097 |
| 399  | DRB3_0301 | SFVIRGDEVQRQIAPG | 3  | IRGDEVQRQI | 0.993    | 0.549064 |
| 430  | DRB3_0301 | TGCVIAWNSNNLDSK  | 4  | IAWNSNNLD  | 0.827    | 0.534940 |
| 702  | DRB3_0301 | ENSVAYSNNNSIAIPT | 3  | VAYSNNNSIA | 0.667    | 0.506589 |
| 314  | DRB3_0301 | QTSNFRVQPTESIVR  | 4  | FRVQPTESI  | 0.953    | 0.482288 |
| 1127 | DRB3_0301 | DVVIGIVNNTVYDPL  | 2  | VIGIVNNTV  | 0.467    | 0.471003 |
| 1126 | DRB3_0301 | CDVVIGIVNNTVYDP  | 4  | IGIVNNTVY  | 0.487    | 0.467142 |
| 1092 | DRB3_0301 | EGVFVSNNGTHWFTQ  | 3  | FVSNNGTHWF | 0.900    | 0.460335 |
| 947  | DRB3_0301 | KLQDVVNQNAQALNT  | 4  | VVNQNAQAL  | 0.607    | 0.451712 |
| 530  | DRB3_0301 | STNLVKNKCVNFNFN  | 3  | LVKNKCVNF  | 0.993    | 0.432644 |

|      |           |                 |   |           |       |          |
|------|-----------|-----------------|---|-----------|-------|----------|
| 65   | DRB3_0301 | FHAIHVSGTNGTKRF | 3 | IHVSGTNGT | 0.980 | 0.423558 |
| 364  | DRB3_0301 | DYSVLYNSASFSTFK | 3 | VLYNSASF  | 0.867 | 0.421713 |
| 906  | DRB3_0301 | FNGIGVTQNVLYENQ | 3 | IGVTQNVLY | 0.853 | 0.419595 |
| 703  | DRB3_0301 | NSVAYSNNIAIPTN  | 3 | AYSNNIAI  | 0.533 | 0.413595 |
| 1185 | DRB3_0301 | RLNEVAKNLNESLID | 4 | VAKNLNESL | 1.000 | 0.411978 |

# Allele: DRB4\_0101

| Pos  | MHC       | Peptide          | Of | Core       | Core_Rel | Score_EL |
|------|-----------|------------------|----|------------|----------|----------|
| 1190 | DRB4_0101 | AKNLNESLIDLQELG  | 3  | LNESLIDLQ  | 1.000    | 0.373391 |
| 1009 | DRB4_0101 | TQQLIRAAEIRASAN  | 4  | IRAAEIRAS  | 0.800    | 0.372095 |
| 1014 | DRB4_0101 | RAAEIRASANLAATK  | 4  | IRASANLAA  | 0.973    | 0.344867 |
| 86   | DRB4_0101 | FNDGVYFASTEKSNI  | 4  | VYFASTEKS  | 1.000    | 0.333224 |
| 355  | DRB4_0101 | RKRISNCVADYSVLY  | 3  | ISNCVADYS  | 1.000    | 0.319595 |
| 314  | DRB4_0101 | QTSNFRVQPTESIVR  | 4  | FRVQPTESI  | 0.987    | 0.318780 |
| 988  | DRB4_0101 | EAEVQIDRLITGRLQ  | 3  | VQIDRLITG  | 0.953    | 0.303910 |
| 39   | DRB4_0101 | PDKVFRSSVLHSTQD  | 3  | VFRSSVLHS  | 0.927    | 0.294615 |
| 799  | DRB4_0101 | GFNFSQILPDPSKPS  | 3  | FSQILPDPS  | 0.960    | 0.294276 |
| 207  | DRB4_0101 | HTPINLVRDLPQGF   | 3  | INLVRDLPQ  | 0.927    | 0.274844 |
| 457  | DRB4_0101 | RKSNLKPFFERDISTE | 4  | LKPFFERDIS | 0.993    | 0.268178 |
| 1003 | DRB4_0101 | SLQTYVTQQLIRAAE  | 4  | YVTQQLIRA  | 0.733    | 0.259812 |
| 802  | DRB4_0101 | FSQILPDPSKPSKRS  | 3  | ILPDPSKPS  | 1.000    | 0.259521 |
| 1005 | DRB4_0101 | QTYVTQQLIRAAEIR  | 3  | VTQQLIRAA  | 0.547    | 0.239215 |
| 764  | DRB4_0101 | NRALTGIAVEQDKNT  | 3  | LTGIAVEQD  | 0.973    | 0.231179 |
| 1168 | DRB4_0101 | DISGINASVVNIQKE  | 4  | INASVVNIQ  | 1.000    | 0.227370 |

# Allele: DRB4\_0103

| Pos  | MHC       | Peptide         | Of | Core      | Core_Rel | Score_EL |
|------|-----------|-----------------|----|-----------|----------|----------|
| 1190 | DRB4_0103 | AKNLNESLIDLQELG | 3  | LNESLIDLQ | 1.000    | 0.373391 |
| 1009 | DRB4_0103 | TQQLIRAAEIRASAN | 4  | IRAAEIRAS | 0.800    | 0.372095 |
| 1014 | DRB4_0103 | RAAEIRASANLAATK | 4  | IRASANLAA | 0.973    | 0.344867 |
| 86   | DRB4_0103 | FNDGVYFASTEKSNI | 4  | VYFASTEKS | 1.000    | 0.333224 |
| 355  | DRB4_0103 | RKRISNCVADYSVLY | 3  | ISNCVADYS | 1.000    | 0.319595 |
| 314  | DRB4_0103 | QTSNFRVQPTESIVR | 4  | FRVQPTESI | 0.987    | 0.318780 |
| 988  | DRB4_0103 | EAEVQIDRLITGRLQ | 3  | VQIDRLITG | 0.953    | 0.303910 |
| 39   | DRB4_0103 | PDKVFRSSVLHSTQD | 3  | VFRSSVLHS | 0.927    | 0.294615 |
| 799  | DRB4_0103 | GFNFSQILPDPSKPS | 3  | FSQILPDPS | 0.960    | 0.294276 |
| 207  | DRB4_0103 | HTPINLVRDLPQGF  | 3  | INLVRDLPQ | 0.927    | 0.274844 |

|      |           |                  |   |            |       |          |
|------|-----------|------------------|---|------------|-------|----------|
| 457  | DRB4_0103 | RKSNLKPFFERDISTE | 4 | LKPFFERDIS | 0.993 | 0.268178 |
| 1003 | DRB4_0103 | SLQTYVTQQLIRAAE  | 4 | YVTQQLIRA  | 0.733 | 0.259812 |
| 802  | DRB4_0103 | FSQILPDPSPKPSKRS | 3 | ILPDPSPKPS | 1.000 | 0.259521 |
| 1005 | DRB4_0103 | QTYVVTQQLIRAAEIR | 3 | VTQQLIRAA  | 0.547 | 0.239215 |
| 764  | DRB4_0103 | NRALTGIAVEQDKNT  | 3 | LTGIAVEQD  | 0.973 | 0.231179 |
| 1168 | DRB4_0103 | DISGINASVVNIQKE  | 4 | INASVVNIQ  | 1.000 | 0.227370 |

# Allele: DRB5\_0101

| Pos  | MHC       | Peptide          | Of | Core      | Core_Rel | Score_EL |
|------|-----------|------------------|----|-----------|----------|----------|
| 343  | DRB5_0101 | NATRFASVYAWNRRK  | 4  | FASVYAWNR | 1.000    | 0.924594 |
| 672  | DRB5_0101 | ASYQTQTNSPRRARS  | 2  | YQTQTNSPR | 0.993    | 0.839527 |
| 779  | DRB5_0101 | QEVFAQVKQIYKTPP  | 3  | FAQVKQIYK | 0.993    | 0.811819 |
| 234  | DRB5_0101 | NITRFQTLALHRSY   | 4  | FQTLALHR  | 1.000    | 0.811567 |
| 191  | DRB5_0101 | EFVFKNIDGYFKIYS  | 3  | FKNIDGYFK | 1.000    | 0.727983 |
| 1062 | DRB5_0101 | FLHVITYVPAQEKNFT | 3  | VTYVPAQEK | 0.980    | 0.691341 |
| 303  | DRB5_0101 | LKSFTVEKGIYQTSN  | 3  | FTVEKGIYQ | 1.000    | 0.677725 |
| 556  | DRB5_0101 | NKKFLPFQFGRDIA   | 3  | FLPFQFGR  | 1.000    | 0.612992 |
| 315  | DRB5_0101 | TSNFRVQPTESIVRF  | 3  | FRVQPTESI | 0.887    | 0.604856 |

# Allele: HLA-DPA10103-DPB10201

| Pos  | MHC                   | Peptide          | Of | Core       | Core_Rel | Score_EL |
|------|-----------------------|------------------|----|------------|----------|----------|
| 338  | HLA-DPA10103-DPB10201 | FGEVFNATRFASVYA  | 4  | FNATRFASV  | 1.000    | 0.958081 |
| 137  | HLA-DPA10103-DPB10201 | NDPFLGVYYHKNNKS  | 3  | FLGVYYHKN  | 1.000    | 0.927370 |
| 448  | HLA-DPA10103-DPB10201 | NYNYLYRFLFRKSNLK | 3  | YLYRFLFRKS | 1.000    | 0.900380 |
| 919  | HLA-DPA10103-DPB10201 | NQKLIANQFNSAIGK  | 3  | LIANQFNSA  | 1.000    | 0.854497 |
| 310  | HLA-DPA10103-DPB10201 | KGIYQTSNFRVQPT   | 3  | YQTSNFRVQ  | 1.000    | 0.798770 |
| 1059 | HLA-DPA10103-DPB10201 | GVVFLHVITYVPAQEK | 3  | FLHVITYVPA | 0.993    | 0.752146 |
| 39   | HLA-DPA10103-DPB10201 | PDKVFRSSVLHSTQD  | 4  | FRSSVLHST  | 1.000    | 0.751483 |
| 229  | HLA-DPA10103-DPB10201 | LPIGINITRFQTLA   | 4  | INITRFQTL  | 1.000    | 0.740551 |
| 500  | HLA-DPA10103-DPB10201 | TNGVGYQPYRVVLS   | 3  | VGYPYRVV   | 0.987    | 0.596417 |
| 186  | HLA-DPA10103-DPB10201 | FKNLREFVFKNIDGY  | 3  | LREFVFKNI  | 1.000    | 0.556008 |
| 794  | HLA-DPA10103-DPB10201 | IKDFGGFNFSQILPD  | 3  | FGGFNFSQI  | 0.980    | 0.542803 |
| 489  | HLA-DPA10103-DPB10201 | YFPLQSYGFQPTNGV  | 3  | LQSYGFQPT  | 1.000    | 0.524831 |
| 1039 | HLA-DPA10103-DPB10201 | RVDFCGKGYHLMSFP  | 3  | FCGKGYHLM  | 1.000    | 0.522161 |
| 167  | HLA-DPA10103-DPB10201 | TFEYVSQPFLMDLEG  | 3  | YVSQPFLMD  | 1.000    | 0.490941 |
| 815  | HLA-DPA10103-DPB10201 | RSFIEDLLFNKVTLA  | 3  | IEDLLFNKV  | 1.000    | 0.474460 |
| 1044 | HLA-DPA10103-DPB10201 | GKGYHLMSFPQSAPH  | 3  | YHLMSFPQS  | 0.973    | 0.374533 |

149 HLA-DPA10103-DPB10201 NKSWMSESEFRVYSSA 3 WMSESEFRVY 0.993 0.341433

# Allele: HLA-DPA10103-DPB10301

| Pos  | MHC                   | Peptide           | Of | Core       | Core_Rel | Score_EL |
|------|-----------------------|-------------------|----|------------|----------|----------|
| 679  | HLA-DPA10103-DPB10301 | NSPRRARSVASQSII   | 4  | RARSVASQS  | 0.680    | 0.828726 |
| 154  | HLA-DPA10103-DPB10301 | ESEFRVYSSANNCTF   | 4  | RVYSSANNC  | 0.693    | 0.733745 |
| 1182 | HLA-DPA10103-DPB10301 | EIDRLNEVAKNLNES   | 3  | RLNEVAKNL  | 0.700    | 0.657668 |
| 762  | HLA-DPA10103-DPB10301 | QLNRALTGIHAVEQDK  | 3  | RALTGIHAVE | 0.760    | 0.657035 |
| 1016 | HLA-DPA10103-DPB10301 | AEIRASANLAATKMS   | 3  | RASANLAAT  | 0.867    | 0.643581 |
| 17   | HLA-DPA10103-DPB10301 | NLTTRTQLPPAYTNS   | 4  | RTQLPPAYT  | 0.700    | 0.624748 |
| 234  | HLA-DPA10103-DPB10301 | NITRFQTLALHRSY    | 3  | RFQTLALH   | 0.753    | 0.617181 |
| 630  | HLA-DPA10103-DPB10301 | TPTWRVYSTGSNVFQ   | 4  | RVYSTGSNV  | 0.707    | 0.597643 |
| 343  | HLA-DPA10103-DPB10301 | NATRFASVYAWNRRK   | 3  | RFASVYAWN  | 0.747    | 0.541066 |
| 404  | HLA-DPA10103-DPB10301 | GDEVQRQIAPGQTGKI  | 4  | RQIAPGQTG  | 0.680    | 0.540501 |
| 243  | HLA-DPA10103-DPB10301 | ALHRSYLTTPGDSSSG  | 3  | RSYLTTPGDS | 0.733    | 0.535052 |
| 1087 | HLA-DPA10103-DPB10301 | AHFPRREGVVFVSNQTH | 4  | REGVVFVSNQ | 0.700    | 0.514743 |

# Allele: HLA-DPA10103-DPB10401

| Pos  | MHC                   | Peptide          | Of | Core       | Core_Rel | Score_EL |
|------|-----------------------|------------------|----|------------|----------|----------|
| 338  | HLA-DPA10103-DPB10401 | FGEVFNATRFASVYA  | 4  | FNATRFASV  | 1.000    | 0.940954 |
| 167  | HLA-DPA10103-DPB10401 | TFEYVSQPFLMDLEG  | 3  | YVSQPFLMD  | 1.000    | 0.648400 |
| 229  | HLA-DPA10103-DPB10401 | LPIGINITRFQTLA   | 4  | INITRFQTL  | 1.000    | 0.613948 |
| 137  | HLA-DPA10103-DPB10401 | NDPFLGVYYHKNNKS  | 3  | FLGVYYHKN  | 0.993    | 0.595645 |
| 310  | HLA-DPA10103-DPB10401 | KGIYQTSNFRVQPT   | 3  | YQTSNFRVQ  | 0.980    | 0.515109 |
| 919  | HLA-DPA10103-DPB10401 | NQKLIANQFNNSAIGK | 3  | LIANQFNNSA | 1.000    | 0.473444 |
| 1059 | HLA-DPA10103-DPB10401 | GVVFLHVTVYVPAQEK | 3  | FLHVTVYVPA | 1.000    | 0.470661 |
| 39   | HLA-DPA10103-DPB10401 | PDKVFRSSVLHSTQD  | 4  | FRSSVLHST  | 0.993    | 0.353789 |
| 815  | HLA-DPA10103-DPB10401 | RSFIEDLLFNKVTLA  | 3  | IEDLLFNKV  | 0.993    | 0.308022 |
| 794  | HLA-DPA10103-DPB10401 | IKDFGGFNFSQILPD  | 3  | FGGFNFSQI  | 0.933    | 0.301512 |
| 465  | HLA-DPA10103-DPB10401 | ERDISTEIQAGSTP   | 3  | ISTEIQAG   | 1.000    | 0.281516 |
| 797  | HLA-DPA10103-DPB10401 | FGGFNFSQILPDPSK  | 3  | FNFSQILPD  | 0.940    | 0.200222 |
| 1044 | HLA-DPA10103-DPB10401 | GKGYHLMSFPQSAPH  | 3  | YHLMSFPQS  | 0.980    | 0.194480 |
| 149  | HLA-DPA10103-DPB10401 | NKSWMSESEFRVYSSA | 3  | WMSESEFRVY | 0.980    | 0.193790 |
| 364  | HLA-DPA10103-DPB10401 | DYSVLYNSASFSTFK  | 5  | YNSASFSTF  | 0.967    | 0.157613 |
| 500  | HLA-DPA10103-DPB10401 | TNGVGYQPYRVVLS   | 3  | VGYPYRVV   | 0.920    | 0.146939 |



|     |                       |                  |   |            |       |          |
|-----|-----------------------|------------------|---|------------|-------|----------|
| 507 | HLA-DPA10103-DPB10401 | PYRVVVLSEFELLHAP | 3 | VVVLSEFELL | 0.920 | 0.142047 |
| 448 | HLA-DPA10103-DPB10401 | NYNYLYRLFRKSNLK  | 3 | YLYRLFRKS  | 0.873 | 0.133866 |

# Allele: HLA-DPA10103-DPB10601

| Pos  | MHC                   | Peptide          | Of | Core       | Core_Rel | Score_EL |
|------|-----------------------|------------------|----|------------|----------|----------|
| 679  | HLA-DPA10103-DPB10601 | NSPRRARSVASQSII  | 3  | RRARSVASQ  | 0.407    | 0.820258 |
| 680  | HLA-DPA10103-DPB10601 | SPRRARSVASQSIIA  | 3  | RARSVASQS  | 0.633    | 0.793414 |
| 154  | HLA-DPA10103-DPB10601 | ESEFRVYSSANNCTF  | 4  | RVYSSANNC  | 0.693    | 0.692347 |
| 343  | HLA-DPA10103-DPB10601 | NATRFASVYAWNRRKR | 3  | RFASVYAWN  | 0.807    | 0.623829 |
| 1181 | HLA-DPA10103-DPB10601 | KEIDRLNEVAKNLNE  | 4  | RLNEVAKNL  | 0.687    | 0.609740 |
| 234  | HLA-DPA10103-DPB10601 | NITRFQTLALHRSY   | 3  | RFQTLALH   | 0.733    | 0.562497 |
| 630  | HLA-DPA10103-DPB10601 | TPTWRVYSTGNSVNFQ | 4  | RVYSTGNSV  | 0.687    | 0.556733 |
| 1016 | HLA-DPA10103-DPB10601 | AEIRASANLAATKMS  | 3  | RASANLAAT  | 0.807    | 0.548163 |
| 17   | HLA-DPA10103-DPB10601 | NLTTRTQLPPAYTNS  | 4  | RTQLPPAYT  | 0.707    | 0.541266 |
| 1180 | HLA-DPA10103-DPB10601 | QKEIDRLNEVAKNLN  | 4  | DRLNEVAKN  | 0.320    | 0.499970 |
| 243  | HLA-DPA10103-DPB10601 | ALHRSYLTTPGDSSSG | 3  | RSYLTTPGDS | 0.727    | 0.457338 |
| 762  | HLA-DPA10103-DPB10601 | QLNRALTGIAVEQDK  | 3  | RALTGIAVE  | 0.780    | 0.449189 |
| 404  | HLA-DPA10103-DPB10601 | GDEVQRQIAPGQTGKI | 4  | RQIAPGQTG  | 0.680    | 0.424062 |

# Allele: HLA-DPA10201-DPB10101

| Pos  | MHC                   | Peptide          | Of | Core       | Core_Rel | Score_EL |
|------|-----------------------|------------------|----|------------|----------|----------|
| 338  | HLA-DPA10201-DPB10101 | FGEVFNATRFASVYA  | 4  | FNATRFASV  | 1.000    | 0.621325 |
| 137  | HLA-DPA10201-DPB10101 | NDPFLGVYYHKNNKS  | 3  | FLGVYYHKN  | 0.993    | 0.352920 |
| 310  | HLA-DPA10201-DPB10101 | KGIYQTSNFRVQPTTE | 3  | YQTSNFRVQ  | 0.860    | 0.337032 |
| 167  | HLA-DPA10201-DPB10101 | TFEYVSQPFLMDLEG  | 3  | YVSQPFLMD  | 0.973    | 0.297948 |
| 39   | HLA-DPA10201-DPB10101 | PDKVFRSSVLHSTQD  | 4  | FRSSVLHST  | 0.900    | 0.282963 |
| 919  | HLA-DPA10201-DPB10101 | NQKLIANQFNSAIGK  | 3  | LIANQFNSA  | 0.967    | 0.252460 |
| 1059 | HLA-DPA10201-DPB10101 | GVVFLHVTVYVPAQEK | 3  | FLHVTVYVPA | 0.840    | 0.242960 |
| 229  | HLA-DPA10201-DPB10101 | LPIGINITRFQTLA   | 4  | INITRFQTL  | 0.973    | 0.238437 |
| 797  | HLA-DPA10201-DPB10101 | FGGFNFSQILPDPSK  | 3  | FNFSQILPD  | 0.927    | 0.213300 |
| 794  | HLA-DPA10201-DPB10101 | IKDFGGFNFSQILPD  | 3  | FGGFNFSQI  | 0.753    | 0.184192 |
| 465  | HLA-DPA10201-DPB10101 | ERDISTEIQAGSTP   | 3  | ISTEIQAG   | 0.880    | 0.176552 |
| 813  | HLA-DPA10201-DPB10101 | SKRSFIEDLLFNKVT  | 5  | IEDLLFNKV  | 0.767    | 0.159134 |
| 364  | HLA-DPA10201-DPB10101 | DYSVLYNSASFSTFK  | 5  | YNSASFSTF  | 0.747    | 0.137097 |
| 315  | HLA-DPA10201-DPB10101 | TSNFRVQPTESIVRF  | 3  | FRVQPTESI  | 0.860    | 0.134168 |

## # Allele: HLA-DPA10201-DPB10501

| Pos  | MHC                   | Peptide          | Of | Core       | Core_Rel | Score_EL |
|------|-----------------------|------------------|----|------------|----------|----------|
| 338  | HLA-DPA10201-DPB10501 | FGVEVFNATRFASVYA | 4  | FNATRFASV  | 0.953    | 0.389147 |
| 137  | HLA-DPA10201-DPB10501 | NDPFLGVVYHKNKNS  | 3  | FLGVVYHKN  | 0.933    | 0.306581 |
| 310  | HLA-DPA10201-DPB10501 | KGIYQTSNFRVQPTTE | 3  | YQTSNFRVQ  | 0.820    | 0.228629 |
| 343  | HLA-DPA10201-DPB10501 | NATRFASVYAWNRKR  | 4  | FASVYAWNR  | 0.513    | 0.194153 |
| 554  | HLA-DPA10201-DPB10501 | ESNKKFLPFQQFGRD  | 3  | KKFLPFQQF  | 0.620    | 0.187663 |
| 39   | HLA-DPA10201-DPB10501 | PDKVFRSSVLHSTQD  | 4  | FRSSVLHST  | 0.853    | 0.183076 |
| 919  | HLA-DPA10201-DPB10501 | NQKLIANQFNSAIGK  | 3  | LIANQFNSA  | 0.947    | 0.165449 |
| 1059 | HLA-DPA10201-DPB10501 | GVVFLHVTVYVPAQEK | 3  | FLHVTVYVPA | 0.800    | 0.156823 |
| 555  | HLA-DPA10201-DPB10501 | SNKKFLPFQQFGRDI  | 4  | FLPFQQFGR  | 0.500    | 0.133289 |
| 234  | HLA-DPA10201-DPB10501 | NITRFQTLALHRSY   | 4  | FQTLALHR   | 0.473    | 0.129145 |
| 446  | HLA-DPA10201-DPB10501 | GGNYNYLYRLFRKSN  | 5  | YLYRLFRKS  | 0.453    | 0.127654 |
| 167  | HLA-DPA10201-DPB10501 | TFEYVSQPFLLMDLEG | 3  | YVSQPFLLMD | 0.907    | 0.108624 |
| 465  | HLA-DPA10201-DPB10501 | ERDISTEIQAGSTP   | 3  | ISTEIQAG   | 0.907    | 0.108208 |
| 912  | HLA-DPA10201-DPB10501 | TQNVLYENQKLIANQ  | 3  | VLYENQKLI  | 0.647    | 0.105018 |
| 778  | HLA-DPA10201-DPB10501 | TQEVFAQVKQIYKTP  | 3  | VFAQVKQIY  | 0.467    | 0.104289 |
| 1044 | HLA-DPA10201-DPB10501 | GKGYHLMSFPQSAPH  | 3  | YHLMSFPQS  | 0.867    | 0.099378 |
| 779  | HLA-DPA10201-DPB10501 | QEVFAQVKQIYKTPP  | 3  | FAQVKQIYK  | 0.587    | 0.096005 |
| 445  | HLA-DPA10201-DPB10501 | VGGNYNYLYRLFRKS  | 4  | YNYLYRLFR  | 0.513    | 0.093976 |

## # Allele: HLA-DPA10201-DPB11401

| Pos  | MHC                   | Peptide          | Of | Core      | Core_Rel | Score_EL |
|------|-----------------------|------------------|----|-----------|----------|----------|
| 155  | HLA-DPA10201-DPB11401 | SEFRVYSSANNCTFE  | 3  | RVYSSANNC | 0.693    | 0.287575 |
| 680  | HLA-DPA10201-DPB11401 | SPRRARSVASQSIIA  | 3  | RARSVASQS | 0.673    | 0.266303 |
| 630  | HLA-DPA10201-DPB11401 | TPTWRVYSTGSNVFQ  | 4  | RVYSTGSNV | 0.713    | 0.250729 |
| 1181 | HLA-DPA10201-DPB11401 | KEIDRLNEVAKNLNE  | 3  | DRLNEVAKN | 0.380    | 0.228405 |
| 343  | HLA-DPA10201-DPB11401 | NATRFASVYAWNRKR  | 3  | RFASVYAWN | 0.493    | 0.213586 |
| 1015 | HLA-DPA10201-DPB11401 | AAEIRASANLAATKM  | 3  | IRASANLAA | 0.407    | 0.207001 |
| 338  | HLA-DPA10201-DPB11401 | FGVEVFNATRFASVYA | 4  | FNATRFASV | 0.947    | 0.205779 |
| 1182 | HLA-DPA10201-DPB11401 | EIDRLNEVAKNLNES  | 3  | RLNEVAKNL | 0.620    | 0.195790 |
| 1016 | HLA-DPA10201-DPB11401 | AEIRASANLAATKMS  | 3  | RASANLAAT | 0.647    | 0.193496 |
| 404  | HLA-DPA10201-DPB11401 | GDEVQRQIAPGQTGKI | 3  | VRQIAPGQT | 0.407    | 0.187268 |
| 39   | HLA-DPA10201-DPB11401 | PDKVFRSSVLHSTQD  | 4  | FRSSVLHST | 0.720    | 0.179055 |
| 405  | HLA-DPA10201-DPB11401 | DEVQRQIAPGQTGKIA | 3  | RQIAPGQTG | 0.640    | 0.178759 |
| 677  | HLA-DPA10201-DPB11401 | QTNSPRRARSVASQS  | 4  | PRRARSVAS | 0.273    | 0.142119 |
| 1070 | HLA-DPA10201-DPB11401 | AQEKNTTAPAICHHD  | 3  | KNTTAPAI  | 0.633    | 0.132628 |

# Allele: HLA-DPA10301-DPB10402

| Pos  | MHC                   | Peptide          | Of | Core       | Core_Rel | Score_EL |
|------|-----------------------|------------------|----|------------|----------|----------|
| 338  | HLA-DPA10301-DPB10402 | FGEVFNATRFASVYA  | 4  | FNATRFASV  | 1.000    | 0.799477 |
| 137  | HLA-DPA10301-DPB10402 | NDPFLGVYYHKNNKS  | 3  | FLGVYYHKN  | 0.967    | 0.534338 |
| 919  | HLA-DPA10301-DPB10402 | NQKLIANQFNNSAIGK | 3  | LIANQFNNSA | 0.993    | 0.466164 |
| 310  | HLA-DPA10301-DPB10402 | KGIYQTSNFRVQPTTE | 3  | YQTSNFRVQ  | 0.920    | 0.463023 |
| 39   | HLA-DPA10301-DPB10402 | PDKVFRSSVLHSTQD  | 4  | FRSSVLHST  | 0.940    | 0.442875 |
| 167  | HLA-DPA10301-DPB10402 | TFEYVSQPFLMDLEG  | 3  | YVSQPFLMD  | 0.980    | 0.435622 |
| 1059 | HLA-DPA10301-DPB10402 | GVVFLHVTVYVPAQEK | 3  | FLHVTVYVPA | 0.933    | 0.413981 |
| 229  | HLA-DPA10301-DPB10402 | LPIGINITRFQTLA   | 4  | INITRFQTL  | 0.993    | 0.384669 |
| 465  | HLA-DPA10301-DPB10402 | ERDISTEIQAGSTP   | 3  | ISTEIQAG   | 0.980    | 0.332258 |
| 797  | HLA-DPA10301-DPB10402 | FGGFNFSQILPDPSK  | 3  | FNFSQILPD  | 0.953    | 0.278486 |
| 815  | HLA-DPA10301-DPB10402 | RSFIEDLLFNKVTLA  | 3  | IEDLLFNKV  | 0.913    | 0.248253 |
| 1044 | HLA-DPA10301-DPB10402 | GKGYHLMSFPPQSAPH | 3  | YHLMSFPPQS | 0.953    | 0.241450 |
| 1003 | HLA-DPA10301-DPB10402 | SLQTYVVTQQLIRAAE | 4  | YVTQQLIRA  | 0.827    | 0.213494 |
| 794  | HLA-DPA10301-DPB10402 | IKDFGGFNFSQILPD  | 3  | FGGFNFSQI  | 0.833    | 0.210810 |
| 315  | HLA-DPA10301-DPB10402 | TSNFRVQPTESIVRF  | 3  | FRVQPTESI  | 0.953    | 0.204325 |
| 912  | HLA-DPA10301-DPB10402 | TQNVLYENQKLIANQ  | 3  | VLYENQKLI  | 0.633    | 0.197556 |

# Allele: HLA-DQA10101-DQB10501

| Pos  | MHC                   | Peptide         | Of | Core      | Core_Rel | Score_EL |
|------|-----------------------|-----------------|----|-----------|----------|----------|
| 207  | HLA-DQA10101-DQB10501 | HTPINLVRDLPQGFS | 3  | INLVRDLPQ | 0.920    | 0.050726 |
| 80   | HLA-DQA10101-DQB10501 | DNPVLPFNDGVYFAS | 3  | VLPFNDGVY | 0.940    | 0.041026 |
| 1141 | HLA-DQA10101-DQB10501 | LQPELDSFKEELDKY | 4  | LDSFKEELD | 0.947    | 0.037753 |
| 430  | HLA-DQA10101-DQB10501 | TGCVIAWNSNNLDSK | 3  | VIAWNSNNL | 0.773    | 0.036926 |
| 867  | HLA-DQA10101-DQB10501 | DEMIAQYTSALLAGT | 3  | IAQYTSALL | 0.887    | 0.035834 |
| 59   | HLA-DQA10101-DQB10501 | FSNVTWFHAIHVSGT | 3  | VTWFHAIHV | 0.813    | 0.033282 |
| 309  | HLA-DQA10101-DQB10501 | EKGIYQTSNFRVQPT | 3  | IYQTSNFRV | 0.727    | 0.030139 |
| 764  | HLA-DQA10101-DQB10501 | NRALTGIAVEQDKNT | 3  | LTGIAVEQD | 0.887    | 0.029183 |
| 1130 | HLA-DQA10101-DQB10501 | IGIVNNTVYDPLQPE | 4  | NNTVYDPLQ | 0.600    | 0.024867 |
| 220  | HLA-DQA10101-DQB10501 | FSALEPLVDLPIGIN | 3  | LEPLVDLPI | 0.980    | 0.023354 |
| 618  | HLA-DQA10101-DQB10501 | TEVPVAIHADQLTPT | 4  | VAIHADQLT | 0.560    | 0.022634 |

# Allele: HLA-DQA10102-DQB10502

| Pos  | MHC                   | Peptide         | Of | Core      | Core_Rel | Score_EL |
|------|-----------------------|-----------------|----|-----------|----------|----------|
| 207  | HLA-DQA10102-DQB10502 | HTPINLVRDLPQGFS | 3  | INLVRDLPQ | 0.973    | 0.130955 |
| 764  | HLA-DQA10102-DQB10502 | NRALTGIAVEQDKNT | 3  | LTGIAVEQD | 0.967    | 0.102791 |
| 1141 | HLA-DQA10102-DQB10502 | LQPELDSFKEELDKY | 4  | LDSFKEELD | 0.980    | 0.073965 |
| 1150 | HLA-DQA10102-DQB10502 | EELDKYFKNHTSPDV | 3  | DKYFKNHTS | 0.840    | 0.059777 |
| 1130 | HLA-DQA10102-DQB10502 | IGIVNNTVYDPLQPE | 4  | NNTVYDPLQ | 0.733    | 0.055147 |
| 80   | HLA-DQA10102-DQB10502 | DNPVLPFNDGVYFAS | 3  | VLPFNDGVY | 0.893    | 0.048192 |
| 618  | HLA-DQA10102-DQB10502 | TEVPVAIHADQLTPT | 4  | VAIHADQLT | 0.707    | 0.045908 |
| 797  | HLA-DQA10102-DQB10502 | FGGFNFSQLPDPSPK | 3  | FNFSQILPD | 0.773    | 0.043116 |

# Allele: HLA-DQA10102-DQB10602

| Pos  | MHC                   | Peptide         | Of | Core      | Core_Rel | Score_EL |
|------|-----------------------|-----------------|----|-----------|----------|----------|
| 1009 | HLA-DQA10102-DQB10602 | TQQLIRAAEIRASAN | 4  | IRAAEIRAS | 1.000    | 0.942370 |
| 1168 | HLA-DQA10102-DQB10602 | DISGINASVVNIQKE | 4  | INASVVNIQ | 1.000    | 0.732077 |
| 634  | HLA-DQA10102-DQB10602 | RVYSTGSNVFQTRAG | 3  | STGSNVFQT | 1.000    | 0.672240 |
| 602  | HLA-DQA10102-DQB10602 | TNTSNQVAVLYQDVN | 4  | NQVAVLYQD | 0.567    | 0.543760 |
| 764  | HLA-DQA10102-DQB10602 | NRALTGIAVEQDKNT | 3  | LTGIAVEQD | 0.993    | 0.526578 |
| 950  | HLA-DQA10102-DQB10602 | DVVNQNAQALNTLVK | 3  | NQNAQALNT | 0.980    | 0.514267 |
| 39   | HLA-DQA10102-DQB10602 | PDKVFRSSVLHSTQD | 4  | FRSSVLHST | 0.633    | 0.503702 |

# Allele: HLA-DQA10103-DQB10603

| Pos  | MHC                   | Peptide          | Of | Core       | Core_Rel | Score_EL |
|------|-----------------------|------------------|----|------------|----------|----------|
| 1009 | HLA-DQA10103-DQB10603 | TQQLIRAAEIRASAN  | 4  | IRAAEIRAS  | 0.927    | 0.561329 |
| 207  | HLA-DQA10103-DQB10603 | HTPINLVRDLPQGFS  | 3  | INLVRDLPQ  | 0.987    | 0.542747 |
| 1130 | HLA-DQA10103-DQB10603 | IGIVNNTVYDPLQPE  | 4  | NNTVYDPLQ  | 0.900    | 0.494898 |
| 1168 | HLA-DQA10103-DQB10603 | DISGINASVVNIQKE  | 4  | INASVVNIQ  | 0.913    | 0.410685 |
| 566  | HLA-DQA10103-DQB10603 | GRDIADTTDAVRDPQ  | 3  | IADTTDAVR  | 0.767    | 0.375269 |
| 764  | HLA-DQA10103-DQB10603 | NRALTGIAVEQDKNT  | 3  | LTGIAVEQD  | 0.947    | 0.354426 |
| 1014 | HLA-DQA10103-DQB10603 | RAAEIRASANLAATK  | 4  | IRASANLAA  | 0.820    | 0.315340 |
| 278  | HLA-DQA10103-DQB10603 | KYNENGTITDAVDCA  | 4  | NGTITDAVD  | 0.627    | 0.267493 |
| 569  | HLA-DQA10103-DQB10603 | IADTTDAVRDPQTLE  | 4  | TDAVRDPQT  | 0.893    | 0.255403 |
| 86   | HLA-DQA10103-DQB10603 | FNDGVYFASTEKSNI  | 4  | VYFASTESK  | 0.933    | 0.250487 |
| 1060 | HLA-DQA10103-DQB10603 | VVFLHVTTYVPAQEKN | 3  | LHVTTYVPAQ | 0.833    | 0.250228 |
| 602  | HLA-DQA10103-DQB10603 | TNTSNQVAVLYQDVN  | 3  | SNQVAVLYQ  | 0.620    | 0.241920 |

# Allele: HLA-DQA10104-DQB10503

| Pos  | MHC                   | Peptide          | Of | Core       | Core_Rel | Score_EL |
|------|-----------------------|------------------|----|------------|----------|----------|
| 207  | HLA-DQA10104-DQB10503 | HTPINLVRDLPOGFS  | 3  | INLVRDLPO  | 0.973    | 0.082710 |
| 232  | HLA-DQA10104-DQB10503 | GINITRFQTLALHR   | 3  | ITRFQTLA   | 0.900    | 0.065833 |
| 1150 | HLA-DQA10104-DQB10503 | EELDKYFKNHTSPDV  | 3  | DKYFKNHTS  | 0.893    | 0.061784 |
| 1009 | HLA-DQA10104-DQB10503 | TQQLIRAAEIRASAN  | 4  | IRAAEIRAS  | 0.773    | 0.054256 |
| 1014 | HLA-DQA10104-DQB10503 | RAAEIRASANLAATK  | 4  | IRASANLAA  | 0.713    | 0.048466 |
| 1097 | HLA-DQA10104-DQB10503 | SNGTHWVFVTQRNFYE | 3  | THWVFVTQRN | 0.787    | 0.045070 |
| 430  | HLA-DQA10104-DQB10503 | TGCVIAWNSNNLDSK  | 3  | VIAWNSNNL  | 0.747    | 0.041535 |
| 1130 | HLA-DQA10104-DQB10503 | IGIVNNTVYDPLQPE  | 4  | NNTVYDPLQ  | 0.640    | 0.039739 |
| 252  | HLA-DQA10104-DQB10503 | GDSSSGWTAGAAAYY  | 3  | SSGWTAGAA  | 0.820    | 0.039244 |
| 764  | HLA-DQA10104-DQB10503 | NRALTGIAVEQDKNT  | 3  | LTGIAVEQD  | 0.867    | 0.039010 |
| 300  | HLA-DQA10104-DQB10503 | KCTLKSFTVEKGIYQ  | 3  | LKSFTVEKG  | 0.960    | 0.037340 |
| 831  | HLA-DQA10104-DQB10503 | AGFIKQYGDCLGDIA  | 3  | IKQYGDCLG  | 0.893    | 0.036251 |
| 59   | HLA-DQA10104-DQB10503 | FSNVTWFHAIHVSGT  | 3  | VTWFHAIHV  | 0.673    | 0.035830 |
| 867  | HLA-DQA10104-DQB10503 | DEMIAQYTSALLAGT  | 3  | IAQYTSALL  | 0.700    | 0.034883 |
| 618  | HLA-DQA10104-DQB10503 | TEVPVAIHADQLTPT  | 4  | VAIHADQLT  | 0.673    | 0.034649 |
| 1141 | HLA-DQA10104-DQB10503 | LQPELDSFKEELDKY  | 4  | LDSFKEELD  | 0.947    | 0.033889 |

# Allele: HLA-DQA10201-DQB10202

| Pos  | MHC                   | Peptide          | Of | Core       | Core_Rel | Score_EL |
|------|-----------------------|------------------|----|------------|----------|----------|
| 617  | HLA-DQA10201-DQB10202 | CTEVPVAIHADQLTP  | 4  | PVAIHADQL  | 0.993    | 0.692045 |
| 566  | HLA-DQA10201-DQB10202 | GRDIADTTDAVRDPQ  | 4  | ADTTDAVRD  | 0.847    | 0.657678 |
| 716  | HLA-DQA10201-DQB10202 | TNFTISVTTEILPVS  | 3  | TISVTTEIL  | 0.773    | 0.545931 |
| 255  | HLA-DQA10201-DQB10202 | SSGWTAGAAAYYVGY  | 3  | WTAGAAAYY  | 0.520    | 0.512220 |
| 1111 | HLA-DQA10201-DQB10202 | EPQIITTDNTFVSGN  | 4  | ITTDNTFVS  | 0.840    | 0.488437 |
| 575  | HLA-DQA10201-DQB10202 | AVRDPQTLEILDITP  | 4  | PQTLEILDI  | 0.993    | 0.456695 |
| 87   | HLA-DQA10201-DQB10202 | NDGVYFASTTEKSNII | 3  | VYFASTTEKS | 0.767    | 0.454872 |
| 797  | HLA-DQA10201-DQB10202 | FGGFNFSQILPDPSK  | 3  | FNFSQILPD  | 0.940    | 0.433096 |
| 88   | HLA-DQA10201-DQB10202 | DGVYFASTTEKSNII  | 5  | ASTEKSNII  | 0.520    | 0.420900 |
| 763  | HLA-DQA10201-DQB10202 | LNRLALTGIAVEQDKN | 4  | LTGIAVEQD  | 0.853    | 0.419571 |

# Allele: HLA-DQA10201-DQB10301

| Pos | MHC | Peptide | Of | Core | Core_Rel | Score_EL |
|-----|-----|---------|----|------|----------|----------|
|-----|-----|---------|----|------|----------|----------|

|      |                       |                  |   |            |       |          |
|------|-----------------------|------------------|---|------------|-------|----------|
| 255  | HLA-DQA10201-DQB10301 | SSGWTAGAAAYVGY   | 3 | WTAGAAAYY  | 0.540 | 0.819672 |
| 256  | HLA-DQA10201-DQB10301 | SGWTAGAAAYVGYL   | 3 | TAGAAAYYV  | 0.547 | 0.741956 |
| 87   | HLA-DQA10201-DQB10301 | NDGVYFASTSEKSNII | 3 | VYFASTSEKS | 0.900 | 0.722439 |
| 1168 | HLA-DQA10201-DQB10301 | DISGINASVVNIQKE  | 4 | INASVVNIQ  | 1.000 | 0.714041 |
| 1009 | HLA-DQA10201-DQB10301 | TQQLIRAAEIRASAN  | 4 | IRAAEIRAS  | 0.980 | 0.686205 |
| 39   | HLA-DQA10201-DQB10301 | PDKVFRSSVLHSTQD  | 4 | FRSSVLHST  | 0.760 | 0.668791 |
| 883  | HLA-DQA10201-DQB10301 | TSGWTFGAGAALQIP  | 5 | FGAGAALQI  | 0.500 | 0.659181 |
| 663  | HLA-DQA10201-DQB10301 | DIPIGAGICASYQTQ  | 3 | IGAGICASY  | 0.707 | 0.598714 |
| 407  | HLA-DQA10201-DQB10301 | VRQIAPGQTGKIADY  | 3 | IAPGQTGKI  | 1.000 | 0.595225 |
| 797  | HLA-DQA10201-DQB10301 | FGGFNFSQILPDPSK  | 3 | FNFSQILPD  | 0.973 | 0.546661 |

# Allele: HLA-DQA10201-DQB10303

| Pos  | MHC                   | Peptide          | Of | Core       | Core_Rel | Score_EL |
|------|-----------------------|------------------|----|------------|----------|----------|
| 86   | HLA-DQA10201-DQB10303 | FNDGVYFASTSEKSNI | 4  | VYFASTSEKS | 0.973    | 0.291270 |
| 1009 | HLA-DQA10201-DQB10303 | TQQLIRAAEIRASAN  | 4  | IRAAEIRAS  | 0.913    | 0.267392 |
| 1168 | HLA-DQA10201-DQB10303 | DISGINASVVNIQKE  | 4  | INASVVNIQ  | 0.900    | 0.267024 |
| 255  | HLA-DQA10201-DQB10303 | SSGWTAGAAAYVGY   | 3  | WTAGAAAYY  | 0.580    | 0.253003 |
| 39   | HLA-DQA10201-DQB10303 | PDKVFRSSVLHSTQD  | 3  | VFRSSVLHS  | 0.500    | 0.227355 |
| 618  | HLA-DQA10201-DQB10303 | TEVPVAIHADQLTPT  | 3  | PVAIHADQL  | 0.767    | 0.212020 |
| 426  | HLA-DQA10201-DQB10303 | PDDFTGCVIAWNSNN  | 3  | FTGCVIAWN  | 0.887    | 0.208378 |
| 566  | HLA-DQA10201-DQB10303 | GRDIADTTDAVRDPQ  | 4  | ADTTDAVRD  | 0.593    | 0.195030 |
| 763  | HLA-DQA10201-DQB10303 | LNRLALTGIAVEQDKN | 4  | LTGIAVEQD  | 0.747    | 0.192315 |
| 797  | HLA-DQA10201-DQB10303 | FGGFNFSQILPDPSK  | 3  | FNFSQILPD  | 0.820    | 0.178888 |
| 256  | HLA-DQA10201-DQB10303 | SGWTAGAAAYVGYL   | 3  | TAGAAAYYV  | 0.527    | 0.172867 |
| 1014 | HLA-DQA10201-DQB10303 | RAAEIRASANLAATK  | 4  | IRASANLAA  | 0.473    | 0.158596 |
| 40   | HLA-DQA10201-DQB10303 | DKVFRSSVLHSTQDL  | 3  | FRSSVLHST  | 0.613    | 0.153906 |
| 1166 | HLA-DQA10201-DQB10303 | LGDISGINASVVNIQ  | 3  | ISGINASVV  | 0.660    | 0.152610 |

# Allele: HLA-DQA10201-DQB10402

| Pos  | MHC                   | Peptide          | Of | Core       | Core_Rel | Score_EL |
|------|-----------------------|------------------|----|------------|----------|----------|
| 1009 | HLA-DQA10201-DQB10402 | TQQLIRAAEIRASAN  | 4  | IRAAEIRAS  | 0.833    | 0.472338 |
| 39   | HLA-DQA10201-DQB10402 | PDKVFRSSVLHSTQD  | 4  | FRSSVLHST  | 0.533    | 0.402738 |
| 60   | HLA-DQA10201-DQB10402 | SNVTWFHAIHVSGTN  | 5  | FHAIHVSGT  | 0.453    | 0.381454 |
| 87   | HLA-DQA10201-DQB10402 | NDGVYFASTSEKSNII | 3  | VYFASTSEKS | 0.773    | 0.381117 |
| 1014 | HLA-DQA10201-DQB10402 | RAAEIRASANLAATK  | 4  | IRASANLAA  | 0.507    | 0.338449 |
| 797  | HLA-DQA10201-DQB10402 | FGGFNFSQILPDPSK  | 3  | FNFSQILPD  | 0.753    | 0.337318 |
| 88   | HLA-DQA10201-DQB10402 | DGVYFASTSEKSNIIR | 3  | YFASTSEKSN | 0.333    | 0.319097 |

|      |                       |                  |   |           |       |          |
|------|-----------------------|------------------|---|-----------|-------|----------|
| 764  | HLA-DQA10201-DQB10402 | NRALTGIAVEQDKNT  | 3 | LTGIAVEQD | 0.800 | 0.318981 |
| 343  | HLA-DQA10201-DQB10402 | NATRFASVYAWNRRK  | 4 | FASVYAWN  | 0.720 | 0.314884 |
| 59   | HLA-DQA10201-DQB10402 | FSNVTWFHAIHVS    | 3 | VTWFHAIHV | 0.440 | 0.312393 |
| 618  | HLA-DQA10201-DQB10402 | TEVPVAIHADQLTPT  | 3 | PVAIHADQL | 0.647 | 0.312056 |
| 255  | HLA-DQA10201-DQB10402 | SSGWTAGAAAYYVGY  | 3 | WTAGAAAYY | 0.553 | 0.310478 |
| 403  | HLA-DQA10201-DQB10402 | RGDEVQRQIAPGQTGK | 4 | VRQIAPGQT | 0.860 | 0.303128 |
| 309  | HLA-DQA10201-DQB10402 | EKGIYQTSNFRVQPT  | 3 | IYQTSNFRV | 0.487 | 0.297633 |
| 310  | HLA-DQA10201-DQB10402 | KGIYQTSNFRVQPT   | 3 | YQTSNFRVQ | 0.453 | 0.291809 |
| 1168 | HLA-DQA10201-DQB10402 | DISGINASVVNIQKE  | 4 | INASVVNIQ | 0.800 | 0.289663 |

# Allele: HLA-DQA10301-DQB10302

| Pos  | MHC                   | Peptide           | Of | Core      | Core_Rel | Score_EL |
|------|-----------------------|-------------------|----|-----------|----------|----------|
| 764  | HLA-DQA10301-DQB10302 | NRALTGIAVEQDKNT   | 3  | LTGIAVEQD | 0.967    | 0.063847 |
| 797  | HLA-DQA10301-DQB10302 | FGGFNFSQLPDP      | 3  | FNFSQILPD | 0.813    | 0.045522 |
| 566  | HLA-DQA10301-DQB10302 | GRDIADTTDAVRDPQ   | 4  | ADTTDAVRD | 0.607    | 0.037359 |
| 1111 | HLA-DQA10301-DQB10302 | EPQIITTDNTFVSGN   | 4  | ITTDNTFVS | 0.747    | 0.032300 |
| 86   | HLA-DQA10301-DQB10302 | FNDGVYFASTEKSNI   | 4  | VYFASTEKS | 0.860    | 0.027269 |
| 1168 | HLA-DQA10301-DQB10302 | DISGINASVVNIQKE   | 4  | INASVVNIQ | 0.673    | 0.020080 |
| 690  | HLA-DQA10301-DQB10302 | QSIIAYTMSLGAENS   | 3  | IAYTMSLGA | 0.287    | 0.019576 |
| 255  | HLA-DQA10301-DQB10302 | SSGWTAGAAAYYVGY   | 4  | TAGAAAYYV | 0.460    | 0.019110 |
| 426  | HLA-DQA10301-DQB10302 | PDDFTGCVIAWNSNN   | 3  | FTGCVIAWN | 0.780    | 0.019060 |
| 207  | HLA-DQA10301-DQB10302 | HTPINALVLRDLPPGFS | 3  | INLVRDLPP | 0.900    | 0.018051 |
| 1009 | HLA-DQA10301-DQB10302 | TQQLIRAAEIRASAN   | 4  | IRAAEIRAS | 0.793    | 0.017722 |
| 618  | HLA-DQA10301-DQB10302 | TEVPVAIHADQLTPT   | 3  | PVAIHADQL | 0.667    | 0.017692 |
| 254  | HLA-DQA10301-DQB10302 | SSSGWTAGAAAYYVG   | 4  | WTAGAAAYY | 0.387    | 0.017133 |
| 1170 | HLA-DQA10301-DQB10302 | SGINASVVNIQKEID   | 4  | ASVVNIQKE | 0.400    | 0.016798 |

# Allele: HLA-DQA10303-DQB10402

| Pos  | MHC                   | Peptide         | Of | Core      | Core_Rel | Score_EL |
|------|-----------------------|-----------------|----|-----------|----------|----------|
| 39   | HLA-DQA10303-DQB10402 | PDKVFRSSVLHSTQD | 4  | FRSSVLHST | 0.600    | 0.231686 |
| 1009 | HLA-DQA10303-DQB10402 | TQQLIRAAEIRASAN | 4  | IRAAEIRAS | 0.900    | 0.230195 |
| 797  | HLA-DQA10303-DQB10402 | FGGFNFSQLPDP    | 3  | FNFSQILPD | 0.787    | 0.209469 |
| 200  | HLA-DQA10303-DQB10402 | YFKIYSKHTPINLVR | 3  | IYSKHTPIN | 0.647    | 0.203023 |
| 818  | HLA-DQA10303-DQB10402 | IEDLLFNKVTLADAG | 4  | LFNKVTLAD | 0.513    | 0.202665 |
| 1151 | HLA-DQA10303-DQB10402 | ELDKYFKNHTSPDVD | 4  | YFKNHTSPD | 0.353    | 0.193426 |
| 197  | HLA-DQA10303-DQB10402 | IDGYFKIYSKHTPIN | 3  | YFKIYSKHT | 0.507    | 0.182090 |
| 1150 | HLA-DQA10303-DQB10402 | EELDKYFKNHTSPDV | 3  | DKYFKNHTS | 0.607    | 0.177460 |

|     |                       |                  |   |           |       |          |
|-----|-----------------------|------------------|---|-----------|-------|----------|
| 630 | HLA-DQA10303-DQB10402 | TPTWRVYSTGNSVVFQ | 3 | WRVYSTGSN | 0.740 | 0.160456 |
| 976 | HLA-DQA10303-DQB10402 | VLNDILSRLDKVEAE  | 4 | ILSRLDKVE | 0.533 | 0.159555 |

# Allele: HLA-DQA10401-DQB10402

| Pos  | MHC                   | Peptide         | Of | Core      | Core_Rel | Score_EL |
|------|-----------------------|-----------------|----|-----------|----------|----------|
| 764  | HLA-DQA10401-DQB10402 | NRALTGIAVEQDKNT | 3  | LTGIAVEQD | 0.927    | 0.292678 |
| 797  | HLA-DQA10401-DQB10402 | FGGFNFSQILPDPSK | 3  | FNFSQILPD | 0.893    | 0.261907 |
| 255  | HLA-DQA10401-DQB10402 | SSGWTAGAAAYVGY  | 4  | TAGAAAYV  | 0.487    | 0.214183 |
| 1009 | HLA-DQA10401-DQB10402 | TQQLIRAAEIRASAN | 4  | IRAAEIRAS | 0.893    | 0.198262 |
| 254  | HLA-DQA10401-DQB10402 | SSSGWTAGAAAYVVG | 4  | WTAGAAAY  | 0.433    | 0.191532 |
| 566  | HLA-DQA10401-DQB10402 | GRDIADTTDAVRDPQ | 4  | ADTTDAVRD | 0.660    | 0.187894 |
| 86   | HLA-DQA10401-DQB10402 | FNDGVYFASTEKSNI | 4  | VYFASTEKS | 0.807    | 0.185829 |
| 1168 | HLA-DQA10401-DQB10402 | DISGINASVVNIQKE | 4  | INASVVNIQ | 0.740    | 0.174254 |
| 618  | HLA-DQA10401-DQB10402 | TEVPVAIHADQLTPT | 3  | PVAIHADQL | 0.727    | 0.159260 |
| 39   | HLA-DQA10401-DQB10402 | PDKVFRSSVLHSTQD | 4  | FRSSVLHST | 0.587    | 0.157120 |
| 1141 | HLA-DQA10401-DQB10402 | LQPELDSFKEELDKY | 4  | LDSFKEELD | 0.933    | 0.150451 |
| 216  | HLA-DQA10401-DQB10402 | LPQGFSALEPLVDLP | 4  | FSALEPLVD | 0.807    | 0.145024 |
| 1170 | HLA-DQA10401-DQB10402 | SGINASVVNIQKEID | 4  | ASVVNIQKE | 0.467    | 0.144171 |

# Allele: HLA-DQA10501-DQB10201

| Pos  | MHC                   | Peptide         | Of | Core      | Core_Rel | Score_EL |
|------|-----------------------|-----------------|----|-----------|----------|----------|
| 617  | HLA-DQA10501-DQB10201 | CTEVPVAIHADQLTP | 4  | PVAIHADQL | 0.993    | 0.680372 |
| 566  | HLA-DQA10501-DQB10201 | GRDIADTTDAVRDPQ | 4  | ADTTDAVRD | 0.687    | 0.513351 |
| 1111 | HLA-DQA10501-DQB10201 | EPQIITTDNTFVSGN | 4  | ITTDNTFVS | 0.860    | 0.497346 |
| 255  | HLA-DQA10501-DQB10201 | SSGWTAGAAAYVGY  | 3  | WTAGAAAY  | 0.560    | 0.491967 |
| 87   | HLA-DQA10501-DQB10201 | NDGVYFASTEKSNI  | 3  | VYFASTEKS | 0.927    | 0.458878 |
| 764  | HLA-DQA10501-DQB10201 | NRALTGIAVEQDKNT | 3  | LTGIAVEQD | 0.960    | 0.441353 |
| 797  | HLA-DQA10501-DQB10201 | FGGFNFSQILPDPSK | 3  | FNFSQILPD | 0.920    | 0.440875 |
| 716  | HLA-DQA10501-DQB10201 | TNFTISVTTEILPVS | 3  | TISVTTEIL | 0.780    | 0.389275 |

# Allele: HLA-DQA10501-DQB10301

| Pos | MHC                   | Peptide        | Of | Core     | Core_Rel | Score_EL |
|-----|-----------------------|----------------|----|----------|----------|----------|
| 255 | HLA-DQA10501-DQB10301 | SSGWTAGAAAYVGY | 3  | WTAGAAAY | 0.620    | 0.821014 |
| 256 | HLA-DQA10501-DQB10301 | SGWTAGAAAYVGYL | 3  | TAGAAAYV | 0.533    | 0.724726 |



|      |                       |                  |   |            |       |          |
|------|-----------------------|------------------|---|------------|-------|----------|
| 87   | HLA-DQA10501-DQB10301 | NDGVYFASTTEKSNI  | 3 | VYFASTTEKS | 0.940 | 0.710684 |
| 1009 | HLA-DQA10501-DQB10301 | TQQLIRAAEIRASAN  | 4 | IRAAEIRAS  | 0.987 | 0.705335 |
| 1168 | HLA-DQA10501-DQB10301 | DISGINASVVNIQKE  | 4 | INASVVNIQ  | 1.000 | 0.674956 |
| 883  | HLA-DQA10501-DQB10301 | TSGWTFGAGAAALQIP | 5 | FGAGAAALQI | 0.607 | 0.660836 |
| 39   | HLA-DQA10501-DQB10301 | PDKVFRSSVLHSTQD  | 4 | FRSSVLHST  | 0.640 | 0.612066 |
| 407  | HLA-DQA10501-DQB10301 | VRQIAPGQTGKIADY  | 3 | IAPGQTGKI  | 0.993 | 0.606718 |
| 663  | HLA-DQA10501-DQB10301 | DIPIGAGICASYQTQ  | 3 | IGAGICASY  | 0.767 | 0.595821 |
| 797  | HLA-DQA10501-DQB10301 | FGGFNFSQILPDPSK  | 3 | FNFSQILPD  | 0.973 | 0.477932 |

# Allele: HLA-DQA10501-DQB10302

| Pos  | MHC                   | Peptide          | Of | Core       | Core_Rel | Score_EL |
|------|-----------------------|------------------|----|------------|----------|----------|
| 764  | HLA-DQA10501-DQB10302 | NRALTGIAVEQDKNT  | 3  | LTGIAVEQD  | 0.920    | 0.151863 |
| 255  | HLA-DQA10501-DQB10302 | SSGWTAGAAAYYVGY  | 3  | WTAGAAAYY  | 0.593    | 0.117918 |
| 1111 | HLA-DQA10501-DQB10302 | EPQIITTDNTFVSGN  | 4  | ITTDNTFVS  | 0.707    | 0.116772 |
| 618  | HLA-DQA10501-DQB10302 | TEVPVAIHADQLTPT  | 3  | PVAIHADQL  | 0.780    | 0.116630 |
| 797  | HLA-DQA10501-DQB10302 | FGGFNFSQILPDPSK  | 3  | FNFSQILPD  | 0.833    | 0.112836 |
| 86   | HLA-DQA10501-DQB10302 | FNDGVYFASTTEKSNI | 4  | VYFASTTEKS | 0.887    | 0.097817 |
| 566  | HLA-DQA10501-DQB10302 | GRDIADTTDAVRDPQ  | 4  | ADTTDAVRD  | 0.527    | 0.089850 |
| 207  | HLA-DQA10501-DQB10302 | HTPINLVRDLPPQGF  | 3  | INLVRDLPP  | 0.847    | 0.078411 |
| 1168 | HLA-DQA10501-DQB10302 | DISGINASVVNIQKE  | 4  | INASVVNIQ  | 0.807    | 0.073628 |
| 1009 | HLA-DQA10501-DQB10302 | TQQLIRAAEIRASAN  | 4  | IRAAEIRAS  | 0.760    | 0.065519 |
| 426  | HLA-DQA10501-DQB10302 | PDDFTGCVIAWNSNN  | 3  | FTGCVIAWN  | 0.860    | 0.062949 |
| 1014 | HLA-DQA10501-DQB10302 | RAAEIRASANLAATK  | 4  | IRASANLAA  | 0.567    | 0.058167 |

# Allele: HLA-DQA10501-DQB10303

| Pos  | MHC                   | Peptide          | Of | Core       | Core_Rel | Score_EL |
|------|-----------------------|------------------|----|------------|----------|----------|
| 86   | HLA-DQA10501-DQB10303 | FNDGVYFASTTEKSNI | 4  | VYFASTTEKS | 0.967    | 0.281831 |
| 1009 | HLA-DQA10501-DQB10303 | TQQLIRAAEIRASAN  | 4  | IRAAEIRAS  | 0.887    | 0.265950 |
| 1168 | HLA-DQA10501-DQB10303 | DISGINASVVNIQKE  | 4  | INASVVNIQ  | 0.893    | 0.230350 |
| 255  | HLA-DQA10501-DQB10303 | SSGWTAGAAAYYVGY  | 3  | WTAGAAAYY  | 0.627    | 0.227774 |
| 39   | HLA-DQA10501-DQB10303 | PDKVFRSSVLHSTQD  | 3  | VFRSSVLHS  | 0.527    | 0.200066 |
| 426  | HLA-DQA10501-DQB10303 | PDDFTGCVIAWNSNN  | 3  | FTGCVIAWN  | 0.913    | 0.189912 |
| 764  | HLA-DQA10501-DQB10303 | NRALTGIAVEQDKNT  | 3  | LTGIAVEQD  | 0.867    | 0.161438 |
| 797  | HLA-DQA10501-DQB10303 | FGGFNFSQILPDPSK  | 3  | FNFSQILPD  | 0.840    | 0.155641 |
| 1014 | HLA-DQA10501-DQB10303 | RAAEIRASANLAATK  | 4  | IRASANLAA  | 0.533    | 0.151400 |
| 618  | HLA-DQA10501-DQB10303 | TEVPVAIHADQLTPT  | 3  | PVAIHADQL  | 0.713    | 0.144207 |

|      |                       |                 |   |           |       |          |
|------|-----------------------|-----------------|---|-----------|-------|----------|
| 40   | HLA-DQA10501-DQB10303 | DKVFRSSVLHSTQDL | 3 | FRSSVLHST | 0.587 | 0.131615 |
| 883  | HLA-DQA10501-DQB10303 | TSGWTFGAGAALQIP | 3 | WTFGAGAAL | 0.340 | 0.125802 |
| 1111 | HLA-DQA10501-DQB10303 | EPQIITTDNTFVSGN | 4 | ITTDNTFVS | 0.800 | 0.124045 |
| 469  | HLA-DQA10501-DQB10303 | STEIYQAGSTPCNGV | 3 | IYQAGSTPC | 0.713 | 0.119697 |
| 393  | HLA-DQA10501-DQB10303 | TNVYADSFVIRGDEV | 3 | YADSFVIRG | 0.907 | 0.118041 |

# Allele: HLA-DQA10501-DQB10402

| Pos  | MHC                   | Peptide          | Of | Core      | Core_Rel | Score_EL |
|------|-----------------------|------------------|----|-----------|----------|----------|
| 1009 | HLA-DQA10501-DQB10402 | TQQLIRAAEIRASAN  | 4  | IRAAEIRAS | 0.827    | 0.497060 |
| 39   | HLA-DQA10501-DQB10402 | PDKVFRSSVLHSTQD  | 4  | FRSSVLHST | 0.493    | 0.413751 |
| 86   | HLA-DQA10501-DQB10402 | FNDGVYFASTEKSNI  | 4  | VYFASTEKS | 0.780    | 0.400926 |
| 61   | HLA-DQA10501-DQB10402 | NVTWFHAIHVSGTNG  | 4  | FHAIHVSGT | 0.673    | 0.385892 |
| 797  | HLA-DQA10501-DQB10402 | FGGFNFSQILPDPSK  | 3  | FNFSQILPD | 0.787    | 0.366966 |
| 403  | HLA-DQA10501-DQB10402 | RGDEV RQIAPGQTGK | 4  | VRQIAPGQT | 0.900    | 0.342012 |
| 764  | HLA-DQA10501-DQB10402 | NRALTGIAVEQDKNT  | 3  | LTGIAVEQD | 0.853    | 0.338381 |
| 1014 | HLA-DQA10501-DQB10402 | RAAEIRASANLAATK  | 4  | IRASANLAA | 0.607    | 0.337765 |
| 343  | HLA-DQA10501-DQB10402 | NATRFASVYAWNRKR  | 4  | FASVYAWNR | 0.740    | 0.335467 |
| 59   | HLA-DQA10501-DQB10402 | FSNVTWFHAIHVSGT  | 3  | VTWFHAIHV | 0.473    | 0.322681 |
| 38   | HLA-DQA10501-DQB10402 | YPDKVFRSSVLHSTQ  | 4  | VFRSSVLHS | 0.433    | 0.319606 |
| 255  | HLA-DQA10501-DQB10402 | SSGWTAGAAAYYVGY  | 3  | WTAGAAAYY | 0.587    | 0.316422 |
| 618  | HLA-DQA10501-DQB10402 | TEVPVAIHADQLTPT  | 3  | PVAIHADQL | 0.653    | 0.314441 |
| 430  | HLA-DQA10501-DQB10402 | TGCVIAWNSNNLDSK  | 3  | VIWNSNNL  | 0.853    | 0.295448 |

# Allele: HLA-DQA10601-DQB10402

| Pos  | MHC                   | Peptide         | Of | Core      | Core_Rel | Score_EL |
|------|-----------------------|-----------------|----|-----------|----------|----------|
| 1009 | HLA-DQA10601-DQB10402 | TQQLIRAAEIRASAN | 4  | IRAAEIRAS | 0.860    | 0.302170 |
| 764  | HLA-DQA10601-DQB10402 | NRALTGIAVEQDKNT | 3  | LTGIAVEQD | 0.887    | 0.258999 |
| 86   | HLA-DQA10601-DQB10402 | FNDGVYFASTEKSNI | 4  | VYFASTEKS | 0.800    | 0.253918 |
| 255  | HLA-DQA10601-DQB10402 | SSGWTAGAAAYYVGY | 3  | WTAGAAAYY | 0.493    | 0.240825 |
| 797  | HLA-DQA10601-DQB10402 | FGGFNFSQILPDPSK | 3  | FNFSQILPD | 0.820    | 0.239470 |
| 39   | HLA-DQA10601-DQB10402 | PDKVFRSSVLHSTQD | 4  | FRSSVLHST | 0.587    | 0.229841 |
| 618  | HLA-DQA10601-DQB10402 | TEVPVAIHADQLTPT | 3  | PVAIHADQL | 0.660    | 0.216226 |
| 60   | HLA-DQA10601-DQB10402 | SNVTWFHAIHVSGTN | 5  | FHAIHVSGT | 0.433    | 0.208136 |
| 252  | HLA-DQA10601-DQB10402 | GDSSSGWTAGAAAYY | 3  | SSGWTAGAA | 0.560    | 0.203025 |
| 1168 | HLA-DQA10601-DQB10402 | DISGINASVVNIQKE | 4  | INASVVNIQ | 0.800    | 0.190324 |
| 343  | HLA-DQA10601-DQB10402 | NATRFASVYAWNRKR | 4  | FASVYAWNR | 0.687    | 0.189315 |
| 566  | HLA-DQA10601-DQB10402 | GRDIADTTDAVRDPQ | 4  | ADTTDAVRD | 0.587    | 0.182640 |

|      |                       |                 |   |           |       |          |
|------|-----------------------|-----------------|---|-----------|-------|----------|
| 1014 | HLA-DQA10601-DQB10402 | RAAEIRASANLAATK | 4 | IRASANLAA | 0.493 | 0.180690 |
| 256  | HLA-DQA10601-DQB10402 | SGWTAGAAAYVGYL  | 3 | TAGAAAYV  | 0.560 | 0.179288 |
| 1141 | HLA-DQA10601-DQB10402 | LQPELDSFKEELDKY | 4 | LDSFKEELD | 0.920 | 0.176775 |
| 59   | HLA-DQA10601-DQB10402 | FSNVTWFHAIHVSGT | 3 | VTWFHAIHV | 0.447 | 0.171340 |

Note: The epitopes mutated in Omicron variant versus Wuhan-1 are indicated in red.
