# Supplementary material for: Predicted HLA Class I and Class II Epitopes From Licensed Vaccines Are Largely Conserved in New SARS-CoV-2 Omicron Variant of Concern
Source: PubMed Central journal article supplement (PMC8831693; doi:10.3389/fimmu.2022.832889), 2022-01-28
Supplement: DataSheet_3.pdf [file DataSheet_3.pdf]

| epitope ID | Sequence              | Begin position |
|------------|-----------------------|----------------|
| 1312101    | AARDLICAQKFNGLT       | 845            |
| 1312102    | AATKMSECVLGQSKR       | 1025           |
| 1314170    | ADAGFIKQY             | 829            |
| 1068878    | ADAGFIKQYGDCLGD       | 829            |
| 1310252    | ADQLTPTWRVYSTGS       | 626            |
| 1068879    | ADSFVIRGDEVQRQA       | 397            |
| 1314194    | AEHVNNSY              | 653            |
| 1312107    | AEHVNNSYECDIPIG       | 653            |
| 1312108    | AEIRASANL             | 1016           |
| 1074838    | AEIRASANLAATK         | 1016           |
| 1310253    | AEIRASANLAATKMS       | 1016           |
| 1393673    | AEIRASANLAATKMSEC     | 1016           |
| 1598225    | AEIRASANLAATKMSECV    | 1016           |
| 1310254    | AENSVAYSNNIAIP        | 701            |
| 1393674    | AENSVAYSNNIAIPTN      | 701            |
| 1598271    | AENSVAYSNNIAIPTNF     | 701            |
| 1314206    | AEVQIDRL              | 989            |
| 1220       | AEVQIDRLI             | 989            |
| 530739     | AEVQIDRLITGRLQS       | 989            |
| 1393677    | AGAAAYYVGYLQPRTFL     | 260            |
| 1393678    | AGAALQIPFAMQMAYRF     | 890            |
| 1598366    | AGAALQIPFAMQMAYRFN    | 890            |
| 1074840    | YSYECDIPIGAGICASYQTQT | 647            |
| 1310259    | AGFIKQYGDCLGDIA       | 831            |
| 1312129    | AIPTNFTISVTTEIL       | 713            |
| 1310266    | AIVMVTIMLCCMTSC       | 1226           |
| 1393684    | AIVMVTIMLCCMTSCCS     | 1226           |
| 1598634    | AIVMVTIMLCCMTSCCSC    | 1226           |
| 1314425    | ALDPLSETK             | 292            |
| 1310271    | ALLAGTITSGWTFGA       | 876            |
| 1393688    | ALLAGTITSGWTFGAGA     | 876            |
| 1598808    | ALLAGTITSGWTFGAGAA    | 876            |
| 2801       | ALNNTLVKQL            | 958            |
| 1312167    | ALQIPFAMQMAYRFN       | 893            |
| 1410559    | ALQIPFAMQMAYRFNGIGV   | 893            |
| 1310274    | ALTGIAVEQDKNTQE       | 766            |
| 1397094    | ANQFNSAIGKIQDSL       | 924            |
| 1310279    | APGQTGKIADYNYKL       | 411            |
| 1330420    | APHGVVFL              | 1056           |
| 3589       | APHGVVFLHV            | 1056           |
| 1074847    | APHGVVFLHVTYV         | 1056           |
| 1310281    | APHGVVFLHVTYVPA       | 1056           |
| 3939       | AQALNTLVK             | 956            |
| 1074854    | AQALNTLVKQL           | 956            |
| 1310282    | AQALNTLVKQLSSNF       | 956            |
| 1069137    | AQYTSALLAGTITSG       | 871            |
| 1310284    | ARDLICAQKFNGLTV       | 846            |
| 1074855    | YTMSLGAENSVAYSNNIAII  | 684            |
| 4321       | ASANLAATK             | 1020           |
| 1393694    | ASFSTFKCYGVSPTKLN     | 372            |
| 1599400    | ASFSTFKCYGVSPTKLND    | 372            |

|         |                      |      |
|---------|----------------------|------|
| 1312226 | ASTEKSNIIRGWIFG      | 93   |
| 1544519 | ASVYAWNRK            | 348  |
| 1329156 | ASVYAWNRKRISN        | 348  |
| 1310294 | ATKMSECVLGQSKRV      | 1026 |
| 1646541 | ATRFASVYA            | 344  |
| 1329170 | ATRFASVYAWNRKRISN    | 344  |
| 1599614 | ATRFASVYAWNRKRISNC   | 344  |
| 1646687 | AVDCALDPL            | 288  |
| 1393699 | AVDCALDPLSETKCTLK    | 288  |
| 1599664 | AVDCALDPLSETKCTLKS   | 288  |
| 1310295 | AVEQDKNTQEVFAQV      | 771  |
| 1393700 | AVEQDKNTQEVFAQVKQ    | 771  |
| 1599678 | AVEQDKNTQEVFAQVKQI   | 771  |
| 1312238 | AVLYQDVNCTEVPVA      | 609  |
| 1393701 | AVRDPQTLEILDITPCS    | 575  |
| 1599765 | AVRDPQTLEILDITPCSF   | 575  |
| 1393702 | AWNSNNLDSKVGGNYY     | 435  |
| 1599836 | AWNSNNLDSKVGGNYYL    | 435  |
| 1647179 | AYRFNGIGV            | 903  |
| 1315180 | AYSNNSIAI            | 706  |
| 1310300 | AYSNNSIAIPTNFTI      | 706  |
| 1074865 | AYSNNSIAIPTNFTISV    | 706  |
| 1393705 | AYTMSLGAENSVAYSNN    | 694  |
| 1599861 | AYTMSLGAENSVAYSNNS   | 694  |
| 1074866 | CALDPLSETK           | 291  |
| 1310302 | CALDPLSETKCTLKS      | 291  |
| 1310303 | CAQKFNGLTVLPPLL      | 851  |
| 1310304 | CASYQTQTNSPRRAR      | 671  |
| 1312257 | CCKFDEDDSEPVLKG      | 1253 |
| 1393707 | CCSCGSCCKFDEDDSEP    | 1247 |
| 1599871 | CCSCGSCCKFDEDDSEPV   | 1247 |
| 1393708 | CCSCLKGCCSCGSCCKF    | 1240 |
| 1599872 | CCSCLKGCCSCGSCCKFD   | 1240 |
| 1310305 | CDVVIGIVNNTVYDP      | 1126 |
| 1310306 | CEFQFCNDPFLGVYY      | 131  |
| 1647797 | CFTNVYADSF           | 391  |
| 1069287 | CFTNVYADSFVIRGD      | 391  |
| 1393709 | CGDSTECSNLLLQYGSF    | 743  |
| 1599891 | CGDSTECSNLLLQYGSFC   | 743  |
| 1312260 | CGPKKSTNLVKNKCV      | 525  |
| 1393711 | CKFDEDDSEPVLKGVKL    | 1254 |
| 1599907 | CKFDEDDSEPVLKGVKLH   | 1254 |
| 1312262 | CLIGAEHVNNSYECD      | 649  |
| 6668    | CMTSCCCLK            | 1236 |
| 1310309 | CMTSCCCLKGCCSC       | 1236 |
| 1331139 | CNDPFLGVY            | 136  |
| 1310311 | CNDPFLGVYYHKNNK      | 136  |
| 1310312 | CPFGEVFNATRFASV      | 336  |
| 1539742 | CPFGEVFNATRFASVYAWNI | 336  |
| 1310316 | CCLKGCCSCGSCCK       | 1241 |
| 1312272 | CSNLLLQYGSFCTQL      | 749  |
| 1312273 | CTEVPVAIHADQLTP      | 617  |

|         |                       |      |
|---------|-----------------------|------|
| 1393715 | CTEVPVAIHADQLTPTW     | 617  |
| 1087469 | CTEVPVAIHADQLTPTWR    | 617  |
| 1074869 | CTFEYVSQPFLM          | 166  |
| 1309110 | CTFEYVSQPFLMDLE       | 166  |
| 1649022 | CTLKSFTVEK            | 301  |
| 1069290 | CTLKSFTVEKGIYQT       | 301  |
| 7247    | CVADYSVLY             | 361  |
| 1069291 | CVADYSVLYNSASFS       | 361  |
| 1393716 | CVNLTRTQLPPAYTNS      | 15   |
| 1599956 | CVNLTRTQLPPAYTNSF     | 15   |
| 1649404 | CYFPLQSYGF            | 488  |
| 1393717 | CYGVSPTKLNDLCFTNV     | 379  |
| 1599960 | CYGVSPTKLNDLCFTNVY    | 379  |
| 1315271 | DAVRDPQTL             | 574  |
| 1312282 | DCTMYICGDSTECNS       | 737  |
| 1312283 | DEDDSEPVKGVKLH        | 1257 |
| 1312289 | DEVRQIAPGQTGKIA       | 405  |
| 1310326 | DFCGKGYHLMSFPQS       | 1041 |
| 1310327 | DFGGFNFSQILPDPS       | 796  |
| 1329262 | DFTGCVIAWNSNNLDSK     | 428  |
| 1600380 | DFTGCVIAWNSNNLDSKV    | 428  |
| 1315357 | DGVYFASTEK            | 88   |
| 1330432 | DGYFKIYSKHTPINL       | 198  |
| 1393720 | DIADTTDAVRDPQTLEI     | 568  |
| 1600534 | DIADTTDAVRDPQTLEIL    | 568  |
| 1310330 | DITPCSFSGVSVITP       | 586  |
| 1312310 | DKVEAEVQIDRLITG       | 985  |
| 9006    | DKYFKNHTSPDVDLG       | 1153 |
| 1312311 | DLCFTNVYADSFVIR       | 389  |
| 1312313 | DLFLPFFSNVTWFHA       | 53   |
| 1312314 | DLGDISGINASVVNI       | 1165 |
| 1074871 | /VNIQKEIDRLNEVAKNLNES | 1165 |
| 1393724 | DLICAQKFNGLTVLPPL     | 848  |
| 1600798 | DLICAQKFNGLTVLPPLL    | 848  |
| 1393725 | DLLFNKVTLADAGFIKQ     | 820  |
| 1600818 | DLLFNKVTLADAGFIKQY    | 820  |
| 1074872 | DLPIGINITRFQTL        | 228  |
| 1393733 | DRLNEVAKNLNESLIDL     | 1184 |
| 1601214 | DRLNEVAKNLNESLIDLQ    | 1184 |
| 10112   | DSFKEELDKY            | 1146 |
| 1310335 | DSFKEELDKYFKNHT       | 1146 |
| 1310336 | DSKTQSLIVNNATN        | 111  |
| 1315542 | DSKVGGNYNY            | 442  |
| 1393735 | DSKVGGNYNYLYRFRK      | 442  |
| 1601336 | DSKVGGNYNYLYRFRKS     | 442  |
| 1310337 | DSLSTASALGKLQD        | 936  |
| 1312333 | DSSSGWTAGAAAYYV       | 253  |
| 1393736 | DSSSGWTAGAAAYYVGY     | 253  |
| 1601381 | DSSSGWTAGAAAYYVGYL    | 253  |
| 1069347 | DSTECNLLLQYGSF        | 745  |
| 1069350 | DTTDAVRDPQTLEIL       | 571  |
| 1393740 | DVDLGDISGINASVVNI     | 1163 |

|         |                      |      |
|---------|----------------------|------|
| 1601527 | DVDLGDISGINASVVNIQ   | 1163 |
| 11038   | EAEVQIDRLITGRLQSL    | 988  |
| 1601746 | EAEVQIDRLITGRLQSLQ   | 988  |
| 1069378 | ECDIPIGAGICASYQ      | 661  |
| 1310345 | ECVLGQSKRVDFCGK      | 1031 |
| 1310352 | EFRVYSSANNCTFEY      | 156  |
| 1309113 | EFVFKNIDGYFKIYS      | 191  |
| 1393743 | EGFNCYFPLQSYGFQPT    | 484  |
| 1602300 | EGFNCYFPLQSYGFQPTN   | 484  |
| 1074876 | EILDITPCSF           | 583  |
| 1315818 | EILPVSMTK            | 725  |
| 1312357 | EILPVSMTKTSVDCT      | 725  |
| 1312358 | EIRASANLAATKMSE      | 1017 |
| 1310360 | EIYQAGSTPCNGVEG      | 471  |
| 1312359 | EKGIYQTSNFRVQPT      | 309  |
| 1393747 | EKGIYQTSNFRVQPTES    | 309  |
| 1602600 | EKGIYQTSNFRVQPTESI   | 309  |
| 1393749 | EKNFTTAPAICHDGKAH    | 1072 |
| 1602664 | EKNFTTAPAICHDGKAHF   | 1072 |
| 1310361 | EKSNIIRGWIFGTTL      | 96   |
| 1310362 | ELDKYFKNHTSPDVD      | 1151 |
| 1074877 | PWYIWLGFIAGLIAIVMTIM | 1202 |
| 1331642 | ELLHAPATV            | 516  |
| 1310365 | ELLHAPATVCGPKKS      | 516  |
| 1540107 | ELLHAPATVCGPKKSTNLVK | 516  |
| 1310367 | ENGTITDAVDCALDP      | 281  |
| 1393752 | ENGTITDAVDCALDPLS    | 281  |
| 1087498 | ENGTITDAVDCALDPLSE   | 281  |
| 1329348 | ENQKLIANQFNSAIGKI    | 918  |
| 1329349 | ENQKLIANQFNSAIGKIQ   | 918  |
| 1315940 | EPLVDLPI             | 224  |
| 1069445 | EPQIITDNTFVSGN       | 1111 |
| 1310371 | EPVLKGVKL            | 1262 |
| 1312376 | EQDKNTQEVFAQVKQ      | 773  |
| 1312380 | ERDISTEIQAGSTP       | 465  |
| 1397111 | ESEFRVYSSANNCTFEYV   | 154  |
| 1329361 | ESNKKFLPFQQFGRDIA    | 554  |
| 1329362 | ESNKKFLPFQQFGRDIAD   | 554  |
| 1316068 | ETKCTLKSF            | 298  |
| 1316107 | EVFAQVKQI            | 780  |
| 1316108 | EVFAQVKQIY           | 780  |
| 1316109 | EVFNATRFASVY         | 340  |
| 1310377 | EVRQIAPGQTGKIAD      | 406  |
| 1540176 | EVRQIAPGQTGKIADYNYKL | 406  |
| 1316287 | EYVSQPFLM            | 169  |
| 1312390 | EYVSQPFLMDLEGKQ      | 169  |
| 1393760 | EYVSQPFLMDLEGKQGN    | 169  |
| 1087507 | EYVSQPFLMDLEGKQGNF   | 169  |
| 1316310 | FAMQMAYRF            | 898  |
| 1546300 | FAQVKQIYK            | 782  |
| 1393761 | FASTEKSNIIRGWIFGT    | 92   |
| 1603889 | FASTEKSNIIRGWIFGTT   | 92   |

|         |                             |      |
|---------|-----------------------------|------|
| 1074883 | WIFGTTLDSKTQSLIVNNA         | 92   |
| 1316312 | FASVYAWNR                   | 347  |
| 1397116 | FASVYAWNRKRISNCVAD          | 347  |
| 1074884 | FCNDPFLGVYY                 | 135  |
| 1316323 | FDEDDSEPV                   | 1256 |
| 1310384 | FDEDDSEPVKGVKL              | 1256 |
| 1316333 | FDNPVLPFNDGVYF              | 79   |
| 1331943 | FELLHAPATV                  | 515  |
| 1316352 | FERDISTEI                   | 464  |
| 1316353 | FERDISTEY                   | 464  |
| 1316355 | FEYVSQPFLM                  | 168  |
| 1074885 | FGEVFNATRFASVY              | 338  |
| 1392147 | FGEVFNATRFASVYA             | 338  |
| 1312421 | FGGFNFSQILPDPSK             | 797  |
| 1432856 | FGGFNFSQILPDPSKPSKR         | 797  |
| 1397120 | FGGFNFSQILPDPSKPSKRS        | 797  |
| 1069519 | FGRDIADTTDAVRDP             | 565  |
| 1310392 | FGTTLDSKTQSLIV              | 106  |
| 1393764 | FGTTLDSKTQSLIVNN            | 106  |
| 1604068 | FGTTLDSKTQSLIVNNA           | 106  |
| 1312426 | FHAIHVS <del>GTNGTKRF</del> | 65   |
| 16156   | FIAGLIAIV                   | 1220 |
| 1546420 | FIEDLLFNK                   | 817  |
| 1069521 | FIEDLLFNKVTLADA             | 817  |
| 1312434 | FIKQYGDCLGDIAAR             | 833  |
| 1312438 | FKCYGVSPTKLNDLC             | 377  |
| 1657458 | FKIYSKHTPI                  | 201  |
| 1310401 | FKIYSKHTPINLVRD             | 201  |
| 1310402 | FKNHTSPDVDLGDIS             | 1156 |
| 1393767 | FKNHTSPDVDLGDISGI           | 1156 |
| 1604142 | FKNHTSPDVDLGDISGIN          | 1156 |
| 1331958 | FKNLREFVF                   | 186  |
| 1310403 | FKNLREFVFKNIDGY             | 186  |
| 1397124 | FLGVYYHKNNKSWMESE           | 140  |
| 1597686 | FLHVTVVPA                   | 1062 |
| 1329407 | FLPFFSNV                    | 55   |
| 1316697 | FLPFFSNVTW                  | 55   |
| 1074888 | FLPFFSNVTWFHAI              | 55   |
| 1310412 | FNCYFPLQSYGFQPT             | 486  |
| 1540297 | FNCYFPLQSYGFQPTNGVG`        | 486  |
| 1310413 | FNDGVYFASTEKSNI             | 86   |
| 1069550 | FNFNGLTGTGVLTES             | 541  |
| 1310414 | FNGIGVTQNVLYENQ             | 906  |
| 1074890 | YENQKLIANQFNNSAIGKIQDE      | 906  |
| 1310415 | FNGLTVLPPLLTDEM             | 855  |
| 1393768 | FNGLTVLPPLLTDEMIA           | 855  |
| 1604218 | FNGLTVLPPLLTDEMIAQ          | 855  |
| 531734  | FPNITNLCPFGEVFN             | 329  |
| 1316853 | FPQSAPHGV                   | 1052 |
| 1074891 | FPQSAPHGVVF                 | 1052 |
| 1316854 | FPREGVVFV                   | 1089 |
| 1312481 | FPREGVVFVSNGTHWF            | 1089 |

|         |                       |      |
|---------|-----------------------|------|
| 1392157 | FQFCNDPFL             | 133  |
| 1312484 | FQFCNDPFLGVYYHK       | 133  |
| 1435610 | FQFCNDPFLGVYYHKNNK    | 133  |
| 1087346 | FQPTNGVGY             | 497  |
| 1312486 | FQPTNGVGYQPYRVV       | 497  |
| 1310418 | FRKSNLKPFERDIST       | 456  |
| 1393770 | FRKSNLKPFERDISTEI     | 456  |
| 1604361 | FRKSNLKPFERDISTEIY    | 456  |
| 1540323 | FRKSNLKPFERDISTEIYQA  | 456  |
| 1331988 | FRSSVLHST             | 43   |
| 1393772 | FRSSVLHSTQDLFLPFF     | 43   |
| 1604374 | FRSSVLHSTQDLFLPFFS    | 43   |
| 1312488 | FRVYSSANNCTFEYV       | 157  |
| 1312501 | FTGCVIAWNSNNLDS       | 429  |
| 1436695 | FTGCVIAWNSNNLDSKVG    | 429  |
| 1317060 | FTISVTTEI             | 718  |
| 1074898 | FTISVTTEIL            | 718  |
| 1310423 | FTVEKGIYQTSNFRV       | 306  |
| 1074900 | FVFKNIDGY             | 192  |
| 1332003 | FVFLVLLPL             | 2    |
| 1659240 | FVFLVLLPLV            | 2    |
| 1317124 | FVIRGDEVR             | 400  |
| 1393775 | FVIRGDEVRQIAPGQTG     | 400  |
| 1604500 | FVIRGDEVRQIAPGQTGK    | 400  |
| 1310426 | FVSGNCDVVIGIVNN       | 1121 |
| 1393777 | FVSGNCDVVIGIVNNTV     | 1121 |
| 1087522 | FVSGNCDVVIGIVNNTVY    | 1121 |
| 1317137 | FVSNGTHWF             | 1095 |
| 1659456 | FVSNGTHWV             | 1095 |
| 1312522 | FYEPQIITTDNTFVS       | 1109 |
| 1437846 | FYEPQIITTDNTFVSGNCD   | 1109 |
| 1317282 | GAAAYYVGY             | 261  |
| 1310431 | GAAAYYVGYLQPRTF       | 261  |
| 18514   | GAALQIPFAMQMAYR       | 891  |
| 1393782 | GAEHVNNSYECDIPIGA     | 652  |
| 1604573 | GAEHVNNSYECDIPIGAG    | 652  |
| 531783  | GAGAALQIPFAMQMA       | 889  |
| 1310434 | GAISSVLNDILSRD        | 971  |
| 1310436 | GCCSCGSCCKFDEDD       | 1246 |
| 1310437 | GCVIAWNSNNLDSKV       | 431  |
| 1317333 | GEVFNATRF             | 339  |
| 1393786 | GFIAGLIAIVMVTIMLC     | 1219 |
| 1605078 | GFIAGLIAIVMVTIMLCC    | 1219 |
| 1074907 | DIAARDLICAQKFNGLTVLPI | 832  |
| 1312542 | GFNCYFPLQSYGFQP       | 485  |
| 1330463 | GFNFSQILPDPSKPSKR     | 799  |
| 1605081 | GFNFSQILPDPSKPSKRS    | 799  |
| 1310441 | GFQPTNGVGYQPYRV       | 496  |
| 1540449 | GFQPTNGVGYQPYRVVLSI   | 496  |
| 1309117 | GGNYNYLYRLFRKSN       | 446  |
| 1540464 | GGNYNYLYRLFRKSNLKPFE  | 446  |
| 1397134 | GGNYNYLYRLFRKSNLKPFER | 446  |

|         |                      |      |
|---------|----------------------|------|
| 1312547 | GGVSVITPGTNTSNQ      | 593  |
| 1312549 | GIAVEQDKNTQEVFA      | 769  |
| 1312550 | GICASYQTQTNSPRR      | 669  |
| 1069816 | GINASVVNIQKEIDR      | 1171 |
| 1354273 | GINITRFQTLALHRSY     | 232  |
| 1605379 | GINITRFQTLALHRSYL    | 232  |
| 1310444 | GIVNNTVYDPLQPEL      | 1131 |
| 1547148 | GIYQTSNFR            | 311  |
| 1310445 | GIYQTSNFRVQPTES      | 311  |
| 1312555 | GKAHFPREGVFVSNG      | 1085 |
| 1397135 | GKGYHLMSFPQSAPH      | 1044 |
| 1393800 | GKGYHLMSFPQSAPHGV    | 1044 |
| 1605487 | GKGYHLMSFPQSAPHGVV   | 1044 |
| 1310447 | GKIADYNYKLPDDFT      | 416  |
| 1540496 | GKIADYNYKLPDDFTGCVIA | 416  |
| 1393801 | GKIQDSLSTASALGKL     | 932  |
| 1605510 | GKIQDSLSTASALGKLQ    | 932  |
| 1310448 | GKLQDVVNQNAQALN      | 946  |
| 1393802 | GKLQDVVNQNAQALNTL    | 946  |
| 1605536 | GKLQDVVNQNAQALNTLV   | 946  |
| 1069822 | GKQGNFKNLREFVFK      | 181  |
| 20907   | GLIAIVMTI            | 1223 |
| 1312569 | GLTGTGVLTESNKKF      | 545  |
| 1125063 | GLTVLPPLL            | 857  |
| 1312570 | GLTVLPPLLTDEMIA      | 857  |
| 1329486 | GNYNLYRLF            | 447  |
| 1087354 | GPKKSTNLV            | 526  |
| 1309118 | GPKKSTNLVKNKCVN      | 526  |
| 1393805 | GPKKSTNLVKNKCVNFN    | 526  |
| 1605951 | GPKKSTNLVKNKCVNFNF   | 526  |
| 1540546 | 3PKKSTNLVKNKCVNFNFNC | 526  |
| 1312600 | GQTGKIADYNYKLPD      | 413  |
| 1310457 | GRDIADTTDAVRDPQ      | 566  |
| 1310459 | GSCCKFDEDDSEPVL      | 1251 |
| 22322   | GSFCTQLNR            | 757  |
| 1070003 | GSFCTQLNRALTGIA      | 757  |
| 1393808 | GSFCTQLNRALTGIAVE    | 757  |
| 1606354 | GSFCTQLNRALTGIAVEQ   | 757  |
| 1310461 | GSTPCNGVEGFNCYF      | 476  |
| 1540593 | 3STPCNGVEGFNCYFPLQS' | 476  |
| 1074915 | GTHWFVTQR            | 1099 |
| 1074916 | GTITSGWTF            | 880  |
| 1663099 | GTKRFDNPV            | 75   |
| 1070035 | GTNTSNQVAVLYQDV      | 601  |
| 1317875 | GVFVSNGTHW           | 1093 |
| 1312621 | GVFVSNGTHWFVTQR      | 1093 |
| 1393817 | GVFVSNGTHWFVTQRNF    | 1093 |
| 1606672 | GVFVSNGTHWFVTQRNFY   | 1093 |
| 1547617 | GVLTESNKK            | 550  |
| 1309120 | GVSPTKLNLDLCFTNV     | 381  |
| 23200   | GVVFLHVTY            | 1059 |
| 1312627 | GVYFASTEK            | 89   |

|         |                        |      |
|---------|------------------------|------|
| 1312628 | GVYFASTEKSNIIRG        | 89   |
| 1597047 | GVYHKNNK               | 140  |
| 1312630 | <b>GVYYHKNNK</b>       | 142  |
| 1317887 | GVYYPDKVFR             | 35   |
| 1312633 | GWTAGAAAYVGYLQ         | 257  |
| 23293   | GWTFGAGAALQIPFA        | 885  |
| 1310470 | GYHLMSFPQSAPHGV        | 1046 |
| 1547648 | GYLQPRTFL              | 268  |
| 1317916 | GYLQPRTFLL             | 268  |
| 1547652 | GYQPYRVVV              | 504  |
| 1074918 | GYQPYRVVLSF            | 504  |
| 1070176 | HADQLTPTWRVYSTG        | 625  |
| 1310473 | <b>HAIHVSGTNGTKRFD</b> | 66   |
| 1393824 | HAPATVCGPKKSTNLVK      | 519  |
| 1606882 | HAPATVCGPKKSTNLVKN     | 519  |
| 1393825 | HGVVFLHVTYVPAQEK       | 1058 |
| 1607025 | HGVVFLHVTYVPAQEKNF     | 1058 |
| 1310474 | HKNNKSWMESEFRVY        | 146  |
| 1318059 | HLMSFPQSA              | 1048 |
| 1312663 | HRSYLTPGDSSSGWT        | 245  |
| 1312672 | HSTQDLFLPFFSNVT        | 49   |
| 1318206 | <b>HVSGTNGTK</b>       | 69   |
| 1312678 | <b>HVSGTNGTKRFDNPV</b> | 69   |
| 1318209 | HVTYVPAQEK             | 1064 |
| 1074925 | HVTYVPAQEKNF           | 1064 |
| 1318219 | HWFVTQRNF              | 1101 |
| 1310476 | HWFVTQRNFYEPQII        | 1101 |
| 1448898 | HWFVTQRNFYEPQIITTDN    | 1101 |
| 1312683 | IADTTDAVRDPQTL         | 569  |
| 1310479 | IAGLIAIVMVTIMLC        | 1221 |
| 1318299 | IAIPTNFTI              | 712  |
| 1070307 | IAIVMVTIMLCCMTS        | 1225 |
| 1318302 | IANQFNSAI              | 923  |
| 1312688 | IAYTMSLGAENSVAY        | 693  |
| 1070308 | ICHDGKAHFPREGVF        | 1081 |
| 1312689 | IDGYFKIYSKHTPIN        | 197  |
| 1393831 | IDGYFKIYSKHTPINLV      | 197  |
| 1607628 | IDGYFKIYSKHTPINLVR     | 197  |
| 1393832 | IDLQELGKYEYIKWPW       | 1198 |
| 1607657 | IDLQELGKYEYIKWPWY      | 1198 |
| 25662   | IDRLITGRLQSLQTY        | 993  |
| 1312693 | IFGTTLDSTQSLLI         | 105  |
| 1074926 | <b>IGAEHVNNSY</b>      | 651  |
| 1310484 | IGAEHVNNSYECDIP        | 651  |
| 1310485 | IGAGICASYQTQTNS        | 666  |
| 1393837 | IGAGICASYQTQTNSPR      | 666  |
| 1607869 | IGAGICASYQTQTNSPRR     | 666  |
| 1310487 | IGINITRFQTLALH         | 231  |
| 1070353 | IGKIQDSLSSTASAL        | 931  |
| 1312699 | IGVTQNVLYENQKLI        | 909  |
| 1318459 | IHADQLTPTW             | 624  |
| 1393841 | IHADQLTPTWRVYSTGS      | 624  |



|         |                       |      |
|---------|-----------------------|------|
| 1451328 | IHADQLTPTWRVYSTGSN    | 624  |
| 26710   | IITDNTFV              | 1114 |
| 1393845 | IITDNTFVSGNCDVVI      | 1114 |
| 1608085 | IITDNTFVSGNCDVVIG     | 1114 |
| 1393846 | IKQYGDCLGDIAARDLI     | 834  |
| 1608169 | IKQYGDCLGDIAARDLIC    | 834  |
| 1074928 | ILPDPSKPSK            | 805  |
| 1312733 | ILPDPSKPSKRSFIE       | 805  |
| 1310497 | ILPVSMTKTSVDCTM       | 726  |
| 1074929 | √QIDRLITGRLQSLQTYVTQ( | 980  |
| 1318821 | INITRFQTL             | 233  |
| 1312746 | INITRFQTLALHRS        | 233  |
| 1318829 | IPFAMQMAY             | 896  |
| 1310503 | IPFAMQMAYRFNGIG       | 896  |
| 1087359 | IPIGAGICASY           | 664  |
| 1318845 | IPTNFTISV             | 714  |
| 1312773 | IRAAEIRASANLAAT       | 1013 |
| 1310506 | IRGWIFGTTLDSKTQ       | 101  |
| 28511   | ISGINASVVNIQKEI       | 1169 |
| 1393855 | ISNCVADYSVLYNSASF     | 358  |
| 1608726 | ISNCVADYSVLYNSASF     | 358  |
| 1312775 | ISSVLNDILSRLDKV       | 973  |
| 1312780 | ITDAVDCALDPLSET       | 285  |
| 1332424 | ITGRLQSLQTY           | 997  |
| 1070482 | ITGRLQSLQTYVTQQ       | 997  |
| 1668465 | ITRFQTLA              | 235  |
| 1310513 | ITRFQTLALHRSYL        | 235  |
| 1310515 | IVRFPNITNLCPFGE       | 326  |
| 1310516 | IWLGFIAGLIAIVMV       | 1216 |
| 1330491 | IYKTPPIKDF            | 788  |
| 1319328 | IYQTSNFRV             | 312  |
| 1074945 | IYSKHTPINL            | 203  |
| 1310519 | KAHFPREGVFVSNGT       | 1086 |
| 1393860 | KAHFPREGVFVSNGTHW     | 1086 |
| 1609103 | KAHFPREGVFVSNGTHWF    | 1086 |
| 1312803 | KCVNFNFNGLTGTGV       | 537  |
| 1311170 | KCYGVSPK              | 378  |
| 1074948 | LPDPSKPSKRSFIEDLLFNK\ | 795  |
| 532384  | KEELDKYFKNHTSPD       | 1149 |
| 1393862 | KEELDKYFKNHTSPDVD     | 1149 |
| 1609487 | KEELDKYFKNHTSPVDL     | 1149 |
| 1074949 | KEIDRLNEV             | 1181 |
| 1310528 | KEIDRLNEVAKNLNE       | 1181 |
| 1319485 | KFLPFQQFGR            | 558  |
| 1312819 | KGCCSCGSCCKFDED       | 1245 |
| 1312823 | KGYHLMSFPQSAPHG       | 1045 |
| 1309123 | KHTPINLVRDLPPQG       | 206  |
| 1319519 | KIADYNYKL             | 417  |
| 1312824 | KIADYNYKLPDDFTG       | 417  |
| 1312838 | KIQDSLSTASALGK        | 933  |
| 1319559 | KIYSKHTPI             | 202  |
| 1312849 | KKFLPFQQFGRDIAD       | 557  |

|         |                      |      |
|---------|----------------------|------|
| 1310542 | KLIANQFNSAIGKIQ      | 921  |
| 1125080 | KLNDLCFTNV           | 386  |
| 1310545 | KLNDLCFTNVYADSF      | 386  |
| 1393870 | KLNDLCFTNVYADSFVI    | 386  |
| 1074951 | KLNDLCFTNVYADSFVIR   | 386  |
| 1541057 | KLNDLCFTNVYADSFVIRGD | 386  |
| 32069   | KLPDDFMGCV           | 411  |
| 1074952 | KLPDDFTGCV           | 424  |
| 1312875 | KNFTTAPAICHGKA       | 1073 |
| 1312876 | KNHTSPDVDLGDIG       | 1157 |
| 1310546 | KNLNEIDLQELGK        | 1191 |
| 1393875 | KNLNEIDLQELGKYE      | 1191 |
| 1610665 | KNLNEIDLQELGKYEQ     | 1191 |
| 1671378 | KNLREFVFK            | 187  |
| 1310548 | KNTQEVFAQVKQIYK      | 776  |
| 1319894 | KPFERDISTEI          | 462  |
| 1074954 | KPFERDISTEIY         | 462  |
| 1070803 | KPSKRSFIEDLLFNK      | 811  |
| 1597721 | KQIYKTPPI            | 786  |
| 1074959 | KQIYKTPPIKDF         | 786  |
| 1310550 | KQIYKTPPIKDFGGF      | 786  |
| 1597722 | <b>KQLSSNFGA</b>     | 964  |
| 1312897 | KRFDNPVLPFNDGVY      | 77   |
| 1310551 | KRISNCVADYSVLYN      | 356  |
| 1541116 | KRISNCVADYSVLYNSASFS | 356  |
| 1070815 | KSNIIRGWIFGTTLD      | 97   |
| 1319957 | KSNLKPFER            | 458  |
| 1549036 | KSTNLVKNK            | 529  |
| 1312907 | KSTNLVKNKCVNFNF      | 529  |
| 1074961 | KSWMESEFRVY          | 150  |
| 1312917 | KTQSLIVNNATNVV       | 113  |
| 1393881 | KTQSLIVNNATNVVIK     | 113  |
| 1087599 | KTQSLIVNNATNVVIKV    | 113  |
| 1074962 | KTSVDCTMYI           | 733  |
| 1312924 | KTSVDCTMYICGDST      | 733  |
| 1312928 | KVCEFQFCNDPFLGV      | 129  |
| 1462784 | KVCEFQFCNDPFLGVYYHK  | 129  |
| 1074963 | LGVYYHKNNKSWMESEFRV  | 129  |
| 1310554 | KVEAEVQIDRLITGR      | 986  |
| 1320006 | KVFRSSVLH            | 41   |
| 1310555 | KVFRSSVLHSTQDLF      | 41   |
| 1320009 | <b>KVGGNYNYLY</b>    | 444  |
| 1312933 | KVTLADAGFIKQYGD      | 825  |
| 1311572 | KWPWYIWLGF           | 1211 |
| 1310560 | KWPWYIWLGFIAGLI      | 1211 |
| 1312935 | KYEQYIKWPWYIWLGF     | 1205 |
| 1393884 | KYEQYIKWPWYIWLGF     | 1205 |
| 1334466 | KYEQYIKWPWYIWLGFIA   | 1205 |
| 1330515 | LADAGFIKQY           | 828  |
| 1312956 | LDITPCSFSGGVSUIT     | 585  |
| 35205   | LDKYFKNHTSPDIDL      | 1152 |
| 1312959 | LDPLSETKCTLKSFT      | 293  |

|         |                    |      |
|---------|--------------------|------|
| 1312961 | LDSFKEELDKYFKNH    | 1145 |
| 1310565 | LDSKVGGNYNLYRL     | 441  |
| 1465145 | LDSKVGGNYNLYRLFRKS | 441  |
| 1393890 | LEILDITPCSFGGVSVI  | 582  |
| 1612142 | LEILDITPCSFGGVSVIT | 582  |
| 1074967 | LEPLVDLPI          | 223  |
| 1320443 | LGAENSVAY          | 699  |
| 1074969 | LGAENSVAYSNN       | 699  |
| 1071133 | LGDIAARDLICAQKF    | 841  |
| 1393892 | LGDIAARDLICAQKFNG  | 841  |
| 1087608 | LGDIAARDLICAQKFNGL | 841  |
| 36075   | LGDISGINASVVNIQ    | 1166 |
| 1312974 | LGKLQDVVNQNAQAL    | 945  |
| 1310575 | LGVYYHKNNKSWMES    | 141  |
| 1393897 | LGVYYHKNNKSWMESEF  | 141  |
| 532715  | LICAQKFNGLTVLPP    | 849  |
| 36481   | LIDLQELGKY         | 1197 |
| 1309125 | LIDLQELGKYEQYI     | 1206 |
| 1312982 | LIDLQELGKYEQYIK    | 1197 |
| 36724   | LITGRLQSL          | 996  |
| 1074971 | LITGRLQSLQTYV      | 996  |
| 1310586 | LITGRLQSLQTYVTQ    | 996  |
| 1310589 | LKPFERDISTEIYQA    | 461  |
| 1071263 | LKYNENGTITDAVDC    | 277  |
| 1071265 | LLAGTITSGWTFGAG    | 877  |
| 1074974 | LLALHRSYL          | 241  |
| 1310592 | LLALHRSYLTPGDSS    | 241  |
| 37289   | LLFNKVTLA          | 821  |
| 1310593 | LLFNKVTLADAGFIK    | 821  |
| 1071268 | LLHAPATVCGPKKST    | 517  |
| 1312997 | LLIVNNATNVVIKVC    | 117  |
| 1310597 | LLKYNENGTITDAVD    | 276  |
| 1676076 | LLPLVSSQCV         | 7    |
| 37724   | LLQYGSFCT          | 753  |
| 1313008 | LLQYGSFCTQLNRAL    | 753  |
| 1332664 | LLTDEMIAQY         | 864  |
| 1310603 | LMDLEGKQGNFKNLR    | 176  |
| 1393903 | LMDLEGKQGNFKNLREF  | 176  |
| 1612907 | LMDLEGKQGNFKNLREFV | 176  |
| 1313029 | LMSFPQSAPHGVVFL    | 1049 |
| 1313032 | LNDILSRLDKVEAEV    | 977  |
| 1313033 | LNESLIDLQELGKYE    | 1193 |
| 1310606 | LNEVAKNLNESLIDL    | 1186 |
| 1313043 | LPDDFTGCVIAWNSN    | 425  |
| 1074979 | NSNNLDSKVGGNYNLYRL | 425  |
| 1310609 | LPDPSKPSKRSFIED    | 806  |
| 1393905 | LPDPSKPSKRSFIEDLL  | 806  |
| 1613044 | LPDPSKPSKRSFIEDLLF | 806  |
| 1310610 | LPFFSNVTWFHAIHV    | 56   |
| 1321049 | LPFNDGVYF          | 84   |
| 1321058 | LPIGINITRF         | 229  |
| 1313051 | LPIGINITRFQTLA     | 229  |

|         |                       |      |
|---------|-----------------------|------|
| 1321078 | LPLVSSQCV             | 8    |
| 1393908 | LPLVSSQCVNLTTRTQL     | 8    |
| 1613172 | LPLVSSQCVNLTTRTQLP    | 8    |
| 1074980 | LPPAYTNSF             | 24   |
| 1321084 | LPPLLTDEM             | 861  |
| 1310611 | LPPLLTDEMIAQYTS       | 861  |
| 1074981 | LPQGFSAL              | 216  |
| 1332697 | LPQGFSALEPL           | 216  |
| 1310612 | LPQGFSALEPLVDLP       | 216  |
| 1332702 | LQELGKYEYQ            | 1200 |
| 38855   | LQIPFAMQM             | 894  |
| 1074986 | LQIPFAMQMAY           | 894  |
| 1310614 | LQPELDSFKEELDKY       | 1141 |
| 38990   | LQSLQTYVTQQLIRA       | 1001 |
| 1677313 | LQSYGFQPT             | 492  |
| 1397166 | LQSYGFQPTNGVGYQPY     | 492  |
| 1313075 | LREFVFKNIDGYFKI       | 189  |
| 1471755 | FVFKNIDGYFKIYSKHTPINL | 189  |
| 1310618 | LSETKCTLKSFTVEK       | 296  |
| 1313083 | LSFELLHAPATVCGP       | 513  |
| 1310620 | LSRLDKVEAEVQIDR       | 981  |
| 1393912 | LSRLDKVEAEVQIDRLI     | 981  |
| 1613822 | LSRLDKVEAEVQIDRLIT    | 981  |
| 1392288 | LSRLDKVEAEVQIDRLITGR  | 981  |
| 1613823 | LSRLDPPEAEVQIDRLIT    | 981  |
| 1310621 | LSSNFGAISSVLNDI       | 966  |
| 1074989 | LSSTASALGK            | 938  |
| 1310623 | LTDEMIAQY             | 865  |
| 1332727 | LTDEMIAQYT            | 865  |
| 1071338 | LTDEMIAQYTSALLA       | 865  |
| 1310624 | LTGTGVLTESNKKFL       | 546  |
| 1313106 | LTPGDSSSGWTAGAA       | 249  |
| 1313108 | LTPTWRVYSTGSNVF       | 629  |
| 1310625 | LVDLPIGINITRFQT       | 226  |
| 1332741 | LVKNKCVNF             | 533  |
| 1313114 | LVKNKCVNFNFNGLT       | 533  |
| 1393916 | LVKNKCVNFNFNGLTGT     | 533  |
| 1614059 | LVKNKCVNFNFNGLTGTG    | 533  |
| 1313117 | LVLLPLVSSQCVNLT       | 5    |
| 1310633 | LYENQKLIANQFNSA       | 916  |
| 1330526 | LYNSASFSTF            | 368  |
| 1310635 | LYQDVNCTEVPVAIH       | 611  |
| 1313147 | MDLEGKQGNFKNLRE       | 177  |
| 1313152 | MESEFRVYSSANNCT       | 153  |
| 1332785 | MFVFLVLLPLVSS         | 1    |
| 1071428 | MFVFLVLLPLVSSQC       | 1    |
| 1393926 | MFVFLVLLPLVSSQCVN     | 1    |
| 1087636 | MFVFLVLLPLVSSQCVNL    | 1    |
| 1313153 | MIAQYTSAL             | 869  |
| 1313154 | MIAQYTSALLAGTIT       | 869  |
| 1393927 | MIAQYTSALLAGTITSG     | 869  |
| 1614342 | MIAQYTSALLAGTITSGW    | 869  |

|         |                      |      |
|---------|----------------------|------|
| 1074998 | TITSGWTFGAGAALQIPFAM | 869  |
| 1313156 | MLCCMTSCCSCLKGC      | 1233 |
| 1393928 | MLCCMTSCCSCLKGCCS    | 1233 |
| 1087637 | MLCCMTSCCSCLKGCCSC   | 1233 |
| 1680251 | MQMAYRFNGI           | 900  |
| 532967  | MSECVLGQSKRVDFC      | 1029 |
| 1313176 | MSLGAENSVAYSNNS      | 697  |
| 1310649 | MTKTSVDCTMYICGD      | 731  |
| 42873   | MTSCCSCLK            | 1237 |
| 1071491 | MTSCCSCLKGCCSCG      | 1237 |
| 1313186 | MVTIMLCCMTSCCSC      | 1229 |
| 1322298 | NASVVNIQK            | 1173 |
| 1313192 | NASVVNIQKEIDRLN      | 1173 |
| 1322299 | NATRFASVY            | 343  |
| 1313193 | NCDVVIGIVNNTVYD      | 1125 |
| 1310653 | NCTEVPVAIHADQLT      | 616  |
| 1313194 | NCTFEYVSQPFLMDL      | 165  |
| 1397173 | NDGVYFASTEKSNIIR     | 87   |
| 1313195 | NDPFLGVYYHKNNKS      | 137  |
| 1310658 | NESLIDLQEL           | 1194 |
| 533050  | NFGAISSVLNDILSR      | 969  |
| 1313201 | NFKNLREFVFKNIDG      | 185  |
| 1393940 | NFNFNGLTGTGVLTESN    | 540  |
| 1614814 | NFNFNGLTGTGVLTESNK   | 540  |
| 1313203 | NFRVQPTESIVRFPN      | 317  |
| 1309132 | NFSQILPDPSKPSKR      | 801  |
| 1479937 | NFSQILPDPSKPSKRSFIE  | 801  |
| 1313204 | NFTISVTTEILPVSM      | 717  |
| 1310659 | NGLTVLPPLLTDEMI      | 856  |
| 1075001 | NGVEGFNCY            | 481  |
| 1071575 | NGVEGFNCYFPLQSY      | 481  |
| 1681938 | NGVGYQPYPYR          | 501  |
| 1310660 | NGVGYQPYPYRVVLSF     | 501  |
| 1597230 | NIADYNYKL            | 414  |
| 1310664 | NIDGYFKIYSKHTPI      | 196  |
| 1393950 | NIIRGWIFGTTLDSKTQ    | 99   |
| 1614938 | NIIRGWIFGTTLDSKTQS   | 99   |
| 1310666 | NITNLCPFGEVFNAT      | 331  |
| 1322395 | NITRFQTL             | 234  |
| 1397175 | NKCVNFNFNGLTGT       | 536  |
| 1310669 | NKCVNFNFNGLTGTG      | 536  |
| 1310671 | NKKFLPFQQFGRDIA      | 556  |
| 1313211 | NKSWMESEFRVYSSA      | 149  |
| 1393952 | NLAATKMSECVLGQSKR    | 1023 |
| 1615045 | NLAATKMSECVLGQSKRV   | 1023 |
| 1075002 | NLDSKVGNGY           | 440  |
| 1071580 | NLLLQYGSFCTQLNR      | 751  |
| 44814   | NLNEIDL              | 1192 |
| 1087385 | NLTTRTQL             | 17   |
| 1313223 | NLTTRTQLPPAYTNS      | 17   |
| 1071585 | NLVRDLPQGFSALEP      | 211  |
| 1393954 | NLVRDLPQGFSALEPLV    | 211  |

|         |                           |      |
|---------|---------------------------|------|
| 1615090 | NLVRDLPQGFSALEPLVD        | 211  |
| 1071586 | NNATNVVIKVFCEQF           | 121  |
| 1393956 | NNKSWMESEFRVYSSAN         | 148  |
| 1615115 | NNKSWMESEFRVYSSANN        | 148  |
| 1313229 | NNSIAIPTNFTISVT           | 709  |
| 1313230 | NNSYECDIPIGAGIC           | 657  |
| 1482748 | NNSYECDIPIGAGICASYQ       | 657  |
| 1310678 | NPVLPFNDGVYFAST           | 81   |
| 1550978 | NQFNNSAIGK                | 925  |
| 1071651 | NQFNNSAIGKIQDSLS          | 925  |
| 1393958 | NQFNNSAIGKIQDSLSST        | 925  |
| 1615253 | NQFNNSAIGKIQDSLSSTA       | 925  |
| 1075005 | NQKLIANQF                 | 919  |
| 1313242 | NQNAQALNTLVKQLS           | 953  |
| 1393960 | NQNAQALNTLVKQLSSN         | 953  |
| 1087668 | NQNAQALNTLVKQLSSNF        | 953  |
| 1329820 | NQNAQALNTLVKQLSSNFG       | 953  |
| 1310681 | <b>NQVAVLYQDVNCTEV</b>    | 606  |
| 1393962 | NRALTGIAVEQDKNTQE         | 764  |
| 1615277 | NRALTGIAVEQDKNTQEV        | 764  |
| 1541817 | NRKRISNCVAD               | 354  |
| 1313244 | <b>NSASFSTFK</b>          | 370  |
| 1322611 | NSFTRGVYY                 | 30   |
| 1322613 | NSIAIPTNF                 | 710  |
| 1313249 | NSNNLDSKVGGNYY            | 437  |
| 1393965 | <b>NTLVKQLSSNFGAISSV</b>  | 960  |
| 1615442 | <b>NTLVKQLSSNFGAISSVL</b> | 960  |
| 1683930 | NTQEVFAQV                 | 777  |
| 1313257 | NTQEVFAQVKQIYKT           | 777  |
| 1322706 | NTSNQVAVLY                | 603  |
| 1393968 | NTSNQVAVLYQDVNCTE         | 603  |
| 1615457 | NTSNQVAVLYQDVNCTEV        | 603  |
| 1393969 | NTVYDPLQPELDSFKEE         | 1135 |
| 1615463 | NTVYDPLQPELDSFKEEL        | 1135 |
| 1310695 | NVFQTRAGCLIGAEH           | 641  |
| 1484768 | NVFQTRAGCLIGAEHVNNS       | 641  |
| 1310701 | <b>NVTWFHAIHVS GTNG</b>   | 61   |
| 1313262 | NVVIKVFCEQFCNDP           | 125  |
| 1322744 | NVYADSFVIR                | 394  |
| 1313269 | NYNYLYRLF                 | 448  |
| 1075012 | NYNYLYRLFRK               | 448  |
| 1597243 | NYNYRYRLF                 | 448  |
| 1393973 | PAICHDGKAHFPREGVF         | 1079 |
| 1615570 | PAICHDGKAHFPREGV FV       | 1079 |
| 1313273 | PAQEKNF T TAPAICH         | 1069 |
| 1310704 | PATVCGPKKSTNLVK           | 521  |
| 1310705 | PAYTNSFTRGVYYPD           | 26   |
| 47041   | PCSF GGVS VITPGTN         | 589  |
| 1393975 | PCSF GGVS VITPGTNTS       | 589  |
| 1615603 | PCSF GGVS VITPGTNTSN      | 589  |
| 1310707 | PDDFTGCVIAWNSNN           | 426  |
| 1541908 | ᵀD DFTGCVIAWNSNNLDSK\     | 426  |

|         |                      |      |
|---------|----------------------|------|
| 1685074 | PFAMQMAYRF           | 897  |
| 1309913 | PFAMQMAYRFNGIGV      | 897  |
| 47479   | PFAMQMAYRFNGIGVTQ    | 897  |
| 1393978 | PFERDISTEIQAGSTP     | 463  |
| 1615654 | PFERDISTEIQAGSTPC    | 463  |
| 1330548 | PFFSNVTWF            | 57   |
| 1313276 | PFFSNVTWFHAIHVS      | 57   |
| 1393979 | PFFSNVTWFHAIHVSQT    | 57   |
| 1087674 | PFFSNVTWFHAIHVSQTN   | 57   |
| 1313277 | PFGEVFNATRFASVY      | 337  |
| 1393980 | PFGEVFNATRFASVYAW    | 337  |
| 1087675 | PFGEVFNATRFASVYAWN   | 337  |
| 1313279 | PFNDGVYFASTEKSN      | 85   |
| 1393981 | PFNDGVYFASTEKSNII    | 85   |
| 1615663 | PFNDGVYFASTEKSNIIIR  | 85   |
| 1310712 | PFQQFGRDIADTTDA      | 561  |
| 1393982 | PFQQFGRDIADTTDAVR    | 561  |
| 1087676 | PFQQFGRDIADTTDAVRD   | 561  |
| 1310714 | PGDSSSGWTAGAAAY      | 251  |
| 1071768 | PHGVVFLHVITYVPAQ     | 1057 |
| 1313281 | PIGAGICASYQTQTN      | 665  |
| 1313282 | PIKDFGGFNFSQILP      | 793  |
| 1313285 | PINLVRDLPQGFSAL      | 209  |
| 1313286 | PINLVRDLPQGFAL       | 209  |
| 1310721 | PLQSYGFQPTNGVGY      | 491  |
| 1393984 | PLQSYGFQPTNGVGYQP    | 491  |
| 1615796 | PLQSYGFQPTNGVGYQPY   | 491  |
| 1393985 | PLSETKCTLKSFTVEKG    | 295  |
| 1615800 | PLSETKCTLKSFTVEKGI   | 295  |
| 1313291 | PLVDLPIGINITRFQ      | 225  |
| 1393986 | PLVDLPIGINITRFQTL    | 225  |
| 1087683 | PLVDLPIGINITRFQTL    | 225  |
| 1313292 | PLVSSQCVNLTTRTQ      | 9    |
| 1393988 | PNITNLCPFGEVFNATR    | 330  |
| 1615820 | PNITNLCPFGEVFNATRF   | 330  |
| 1397182 | PPAYTNSFTRGVYY       | 25   |
| 1071788 | PPAYTNSFTRGVYYP      | 25   |
| 1393989 | PPIKDFGGFNFSQILPD    | 792  |
| 1615833 | PPIKDFGGFNFSQILPDP   | 792  |
| 1393990 | PPLLTDEMIAQYTSALL    | 862  |
| 1071794 | PQGFSALEPLVDLPI      | 217  |
| 1313307 | PQSAPHGVVFLHVITY     | 1053 |
| 1310725 | PRRARSVASQSIIAY      | 681  |
| 1397183 | PRTFLLKYNENGTITDA    | 272  |
| 1313311 | PSKPSKRFSIEDLLF      | 809  |
| 1393995 | PTNFTISVTTEILPVSM    | 715  |
| 1615945 | PTNFTISVTTEILPVSM    | 715  |
| 1075016 | VVVLSFELLHAPATVCGPKK | 499  |
| 1071818 | PTWRVYSTGSNVFQT      | 631  |
| 1393996 | PTWRVYSTGSNVFQTRA    | 631  |
| 1615952 | PTWRVYSTGSNVFQTRAG   | 631  |
| 1310729 | PVAIHADQLTPTWRV      | 621  |

|         |                       |      |
|---------|-----------------------|------|
| 1071825 | PWYIWLGFIAGLIAI       | 1213 |
| 50166   | PYRVVLSF              | 507  |
| 1313324 | QALNTLVKQLSSNFG       | 957  |
| 1071848 | QDVNCTEVPVAIHAD       | 613  |
| 1491922 | QDVNCTEVPVAIHADQLTP   | 613  |
| 533333  | QDVVNQNAQALNTLV       | 949  |
| 1310733 | QEKNFHTTAPAICHDG      | 1071 |
| 1323200 | QELGKYEQY             | 1201 |
| 1071850 | QELGKYEQYIKWPWY       | 1201 |
| 1323207 | QEVFAQVKQIY           | 779  |
| 1075019 | QEVFAQVKQIYK          | 779  |
| 1366891 | QFCNDPFLGVYHKNNK      | 134  |
| 1394001 | QFCNDPFLGVYYHKNNK     | 134  |
| 1616213 | QFCNDPFLGVYYHKNNKS    | 134  |
| 1310735 | QFNSAIGKIQDSLSS       | 926  |
| 1394003 | QGFSALEPLVDLPIGIN     | 218  |
| 1616228 | QGFSALEPLVDLPIGINI    | 218  |
| 1394004 | QGNFKNLREFVFKNIDG     | 183  |
| 1616242 | QGNFKNLREFVFKNIDGY    | 183  |
| 1323249 | QIAPGQTGK             | 409  |
| 1313338 | QIAPGQTGKIADYNY       | 409  |
| 1313341 | QIITTDNTFVSGNCD       | 1113 |
| 1323266 | QIPFAMQMAY            | 895  |
| 1397188 | QIPFAMQMAYRFNGIGV     | 895  |
| 1313344 | QIYKTPPIK             | 787  |
| 1071969 | QKFNGLTVLPPLTD        | 853  |
| 1397189 | QKLIANQFNSAIGKI       | 920  |
| 1310739 | QLIRAAEIRASANLA       | 1011 |
| 1584233 | QLIRAAEIRASANLAATKM   | 1011 |
| 1688328 | QLNRALTGI             | 762  |
| 1313359 | QLSSNFGAISSVLND       | 965  |
| 1323406 | QLTPTWRVY             | 628  |
| 1071978 | QMAYRFNGIGVTQNV       | 901  |
| 1313363 | QNVLYENQKLIANQF       | 913  |
| 1394010 | QPELDSFKEELDKYFKN     | 1142 |
| 1616461 | QPELDSFKEELDKYFKNH    | 1142 |
| 1313368 | QPFLMDLEGKQGNFK       | 173  |
| 1072010 | QPRTFLLKYNENGTI       | 271  |
| 1323461 | QPTESIVRF             | 321  |
| 1310745 | QPTESIVRFPNITNL       | 321  |
| 1394011 | QPTNGVGYQPYRVVLS      | 498  |
| 1616502 | QPTNGVGYQPYRVVLSF     | 498  |
| 1323467 | QPYRVVVL              | 506  |
| 51999   | QPYRVVLSF             | 506  |
| 1310747 | QPYRVVLSFELLHA        | 506  |
| 1542166 | QPYRVVLSFELLHAPATVC   | 506  |
| 1310750 | QRNFYEPQIITTDNT       | 1106 |
| 1333222 | QSAPHGVVF             | 1054 |
| 1075023 | /TYVPAQEKNFTTAPAICHDX | 1054 |
| 1310752 | QSKRVDFCGKGYHLM       | 1036 |
| 1394014 | QSLQTYVTQQLIRAAEI     | 1002 |
| 1616645 | QSLQTYVTQQLIRAAEIR    | 1002 |



|         |                      |      |
|---------|----------------------|------|
| 1313385 | QSYGFQPTNGVGYQP      | 493  |
| 1394015 | QTGKIADYNYKLPDDFT    | 414  |
| 1616678 | QTGKIADYNYKLPDDFTG   | 414  |
| 1394016 | QTLALHRSYLTPGDSS     | 239  |
| 1616685 | QTLALHRSYLTPGDSSS    | 239  |
| 1323599 | QTNSPRRAR            | 677  |
| 1313388 | QTNSPRRARSVASQS      | 677  |
| 52672   | QTYVTQQLIRAAEIR      | 1005 |
| 1310755 | QYGDCLGDIAARDLI      | 836  |
| 52911   | QYGSFCTQL            | 755  |
| 1310756 | QYIKWPWYI            | 1208 |
| 1323673 | QYIKWPWYIW           | 1208 |
| 1310759 | RAGCLIGAEHVNNSY      | 646  |
| 1313403 | RALTGIAVEQDKNTQ      | 765  |
| 1689634 | RARSVASQSI           | 683  |
| 1323750 | RASANLAATK           | 1019 |
| 1310761 | RDISTEIQAGSTPC       | 466  |
| 1329990 | RDISTEIQAGSTPCNGVEG  | 466  |
| 1072118 | RDPQTLEILDITPCS      | 577  |
| 1329996 | REFVFKNIDGYFKIYSK    | 190  |
| 1617118 | REFVFKNIDGYFKIYSKH   | 190  |
| 1075025 | REGVFVSNNGTHW        | 1091 |
| 1310763 | REGVFVSNNGTHWFVT     | 1091 |
| 1323761 | RFASVYAWNR           | 346  |
| 1542248 | RFASVYAWNRKR         | 346  |
| 1310765 | RFASVYAWNRKRISN      | 346  |
| 1542249 | RFASVYAWNRKRISNCVAD\ | 346  |
| 1087399 | RFDNPVLPF            | 78   |
| 1394021 | RFDNPVLPFNDGVYFAS    | 78   |
| 1313420 | RFNGIGVTQNVLYEN      | 905  |
| 1323786 | RFPNITNLCPF          | 328  |
| 1313423 | RFQTLALHRSYLTP       | 237  |
| 1075029 | RISNCVADY            | 357  |
| 1313442 | RISNCVADYSVLYNS      | 357  |
| 1498219 | RISNCVADYSVLYNSASFS  | 357  |
| 1690556 | RKRISNCVA            | 355  |
| 1542282 | RKRISNCVAD           | 355  |
| 1072366 | RKSNLKPFERDISTE      | 457  |
| 54507   | RLDKVEAEV            | 983  |
| 1333325 | RLDKVEAEVQI          | 983  |
| 1075031 | RLFRKSNLK            | 454  |
| 54599   | RLITGRLQSLQTYVTQQ    | 995  |
| 1309940 | RLITGRLQSLQTYVTQQ    | 995  |
| 54680   | RLNEVAKNL            | 1185 |
| 1313457 | RLNEVAKNLNESLID      | 1185 |
| 1323919 | RLQSLQTY             | 1000 |
| 54725   | RLQSLQTYV            | 1000 |
| 1394027 | RNFYEPQIITDNTFVS     | 1107 |
| 1617939 | RNFYEPQIITDNTFVSG    | 1107 |
| 1330580 | RQIAPGQTGK           | 408  |
| 1075039 | RQIAPGQTGKIADYNYKL   | 408  |
| 1324060 | RSVASQSII            | 685  |

|         |                     |      |
|---------|---------------------|------|
| 1075041 | RSVASQSIIAYTMSL     | 685  |
| 1310775 | RSYLTPGDSSSGWTA     | 246  |
| 1394031 | RSYLTPGDSSSGWTAGA   | 246  |
| 1618573 | RSYLTPGDSSSGWTAGAA  | 246  |
| 1313495 | RTFLLKYNENGTITD     | 273  |
| 1310777 | RTQLPPAYTNSFTRG     | 21   |
| 56252   | RVDFCGKGY           | 1039 |
| 1333410 | RVQPTESIVRF         | 319  |
| 1313517 | RVVVLSFELLHAPAT     | 509  |
| 1501129 | RVVVLSFELLHAPATVCGP | 509  |
| 1324116 | RVYSTGSNV           | 634  |
| 1324117 | RVYSTGSNVF          | 634  |
| 1313526 | SAIGKIQDSLSTAS      | 929  |
| 1310785 | SALEPLVDLPIGINI     | 221  |
| 1072541 | SANLAATKMSECVLG     | 1021 |
| 1324274 | SANNCTFEY           | 162  |
| 1394035 | SANNCTFEYVSQPFLMD   | 162  |
| 1618992 | SANNCTFEYVSQPFLMDL  | 162  |
| 1333450 | SASFSTFKCY          | 371  |
| 1310787 | SASFSTFKCYGVSPT     | 371  |
| 533643  | SCGSCCKFDEDDSEP     | 1249 |
| 1394041 | SECVLGQSKRVDFCGKG   | 1030 |
| 1619203 | SECVLGQSKRVDFCGKGY  | 1030 |
| 1394042 | SEFRVYSSANNCTFEYV   | 155  |
| 1619222 | SEFRVYSSANNCTFEYVS  | 155  |
| 57592   | SEPVLKGVKL          | 1261 |
| 1072563 | SEPVLKGVKLHYT       | 1261 |
| 1324353 | SETKCTLKSF          | 297  |
| 1075045 | SETKCTLKSFTVEK      | 297  |
| 1313542 | SETKCTLKSFTVEKG     | 297  |
| 1333520 | SFELLHAPATV         | 514  |
| 1310795 | SFGGVSVITPGTNTS     | 591  |
| 1333523 | SFIEDLLF            | 816  |
| 1310796 | SFIEDLLFNKVTLAD     | 816  |
| 1324400 | SFKEELDKY           | 1147 |
| 1324414 | SFPQSAPHGVVF        | 1051 |
| 1072604 | SFPQSAPHGVVFLHV     | 1051 |
| 1394045 | SFPQSAPHGVVFLHVTY   | 1051 |
| 1619379 | SFPQSAPHGVVFLHVTVV  | 1051 |
| 1313549 | SFSTFKCYGVSPTKL     | 373  |
| 1072624 | SFTRGVYYPDKVFRS     | 31   |
| 1313550 | SFTVEKGIYQTSNFR     | 305  |
| 1394049 | SGINASVVNIQKEIDRL   | 1170 |
| 1619434 | SGINASVVNIQKEIDRLN  | 1170 |
| 1310799 | SGTNGTKRFDNPVLP     | 71   |
| 1394052 | SGTNGTKRFDNPVLPFN   | 71   |
| 1619518 | SGTNGTKRFDNPVLPFND  | 71   |
| 1310800 | SGWTAGAAAYVGYL      | 256  |
| 1310802 | SIAIPTNFTISVTTE     | 711  |
| 1309137 | SIIAYTMSL           | 691  |
| 1310803 | SIIAYTMSLGAENSV     | 691  |
| 58730   | SIVAYTMSL           |      |

|         |                      |      |
|---------|----------------------|------|
| 1313572 | SIVRFPNITNLCDFG      | 325  |
| 1072807 | SKHTPINLVRDLPQG      | 205  |
| 1313576 | SKRSFIEDLLFNKVT      | 813  |
| 1370489 | SKRSFIEDLLFNKVTLA    | 813  |
| 1619782 | SKRSFIEDLLFNKVTLAD   | 813  |
| 1505853 | SKRSFIEDLLFNKVTLADA  | 813  |
| 1333568 | SKRVDFCGKGY          | 1037 |
| 1313577 | SKRVDFCGKGYHLMS      | 1037 |
| 1394060 | SKRVDFCGKGYHLMSFP    | 1037 |
| 1619788 | SKRVDFCGKGYHLMSFPQ   | 1037 |
| 1125138 | SLIDLQEL             | 1196 |
| 59161   | SLIDLQELGK           | 1196 |
| 1310809 | SLIDLQELGKYEYI       | 1196 |
| 59162   | SLIDLQELGKYEYIKW     | 1196 |
| 1310810 | SLLIVNNATNVVIK       | 116  |
| 1072822 | SLSSTASALGKLQDV      | 937  |
| 1310814 | SNFRVQPTESIVRFP      | 316  |
| 1394062 | SNFRVQPTESIVRFPNI    | 316  |
| 1542532 | SNFRVQPTESIVRFPNITNL | 316  |
| 1313627 | SNGTHWFVTQRNFYE      | 1097 |
| 1394065 | SNLLLQYGSFCTQLNRA    | 750  |
| 1619999 | SNLLLQYGSFCTQLNRAL   | 750  |
| 1394066 | SNNSIAIPTNFTISVTT    | 708  |
| 1620005 | SNNSIAIPTNFTISVTTE   | 708  |
| 1313628 | SNQVAVLYQDVNCTE      | 605  |
| 60024   | SPDVDLGDISGINAS      | 1161 |
| 1324899 | SPRRARSV             | 680  |
| 1311590 | SPRRARVA             | 680  |
| 1394068 | SPRRARSVASQSIIAYT    | 680  |
| 1620210 | SPRRARSVASQSIIAYTM   | 680  |
| 1313652 | SQCVNLTRTQLPPA       | 13   |
| 1313657 | SQSIIAYTMSLGAEN      | 689  |
| 1333782 | SSANNCTFEY           | 161  |
| 1310820 | SSANNCTFEYVSQPF      | 161  |
| 1508891 | SSANNCTFEYVSQPFLMDL  | 161  |
| 1394071 | SSNFGAISSVLNDILSR    | 967  |
| 1620549 | SSNFGAISSVLNDILSRL   | 967  |
| 1310821 | SSTASALGK            | 939  |
| 1394073 | SSTASALGKLQDVVNQN    | 939  |
| 1620617 | SSTASALGKLQDVVNQNA   | 939  |
| 1313684 | SSVLHSTQDLFLPFF      | 45   |
| 1394074 | SSVLNDILSRLDKVEAE    | 974  |
| 1620632 | SSVLNDILSRLDKVEAEV   | 974  |
| 1620633 | SSVLNDILSRLDPPEAEV   | 974  |
| 1333801 | STECSNLLLQY          | 746  |
| 1309139 | STECSNLLLQYGSFC      | 746  |
| 1313689 | STEIQAGSTPCNGV       | 469  |
| 1325105 | STGSNVFQTR           | 637  |
| 1072943 | STGSNVFQTRAGCLI      | 637  |
| 1313696 | STPCNGVEGFNCYFP      | 477  |
| 1394075 | STPCNGVEGFNCYFPLQ    | 477  |
| 1620718 | STPCNGVEGFNCYFPLQS   | 477  |

|         |                      |      |
|---------|----------------------|------|
| 1333812 | STQDLFLPF            | 50   |
| 1075065 | STQDLFLPFF           | 50   |
| 1394076 | STQDLFLPFFSNVTWFH    | 50   |
| 1620734 | STQDLFLPFFSNVTWFHA   | 50   |
| 1325128 | SVASQSIIAY           | 686  |
| 1310825 | SVASQSIIAYTMSLG      | 686  |
| 1310826 | SVITPGTNTSNQVAV      | 596  |
| 1394079 | SVITPGTNTSNQVAVLY    | 596  |
| 1620817 | SVITPGTNTSNQVAVLYQ   | 596  |
| 1310827 | SVLHSTQDLFLPFFS      | 46   |
| 62221   | SVLNDILSR            | 975  |
| 1075066 | SVLNDILSRL           | 975  |
| 1392439 | SVLYNSASF            | 366  |
| 1310828 | SVLYNSASFSTFKCY      | 366  |
| 1542626 | SVLYNSASFSTFKCYGVSP  | 366  |
| 1597815 | SVTTEILPV            | 721  |
| 1072965 | SVTTEILPVSMTKTS      | 721  |
| 1075068 | KTSVDCTMYICGDSTECUNI | 721  |
| 1325172 | SVYAWNRRKR           | 349  |
| 1313713 | SVYAWNRRKRISNCVA     | 349  |
| 1333886 | SWMESEFRV            | 151  |
| 1325190 | SWMESEFRVY           | 151  |
| 1310830 | SWMESEFRVYSSANN      | 151  |
| 1394083 | SYECDIPIGAGICASYQ    | 659  |
| 1620909 | SYECDIPIGAGICASYQT   | 659  |
| 1313719 | SYQTQTNSPRRARSV      | 673  |
| 1075070 | SYQTQTNSPRRARSVA     | 673  |
| 1394085 | SYQTQTNSPRRARSVAS    | 673  |
| 1087736 | SYQTQTNSPRRARSVASQ   | 673  |
| 1313732 | TAPAICHGKAHFPR       | 1077 |
| 1310833 | TASALGKLQDVVNQN      | 941  |
| 1310834 | TDAVDCALDPLSETK      | 286  |
| 1313735 | TDAVRDPQTLEILDI      | 573  |
| 1333921 | TDEMIAQY             | 866  |
| 1330164 | TDEMIAQYTSALLA       | 866  |
| 1309140 | TDEMIAQYTSALLAG      | 866  |
| 1073276 | TDNTFVSGNCDVVIG      | 1117 |
| 1325401 | TECSNLLLQY           | 747  |
| 1087408 | TEILPVSMK            | 724  |
| 1394090 | TEIYQAGSTPCNGVEGF    | 470  |
| 1621193 | TEIYQAGSTPCNGVEGFN   | 470  |
| 1075071 | TEKSNIIRGW           | 95   |
| 1325420 | TESIVRFPNITNL        | 323  |
| 1394091 | TESIVRFPNITNLCPFGE   | 323  |
| 1621247 | TESIVRFPNITNLCPFGE   | 323  |
| 1325421 | TESNKKFLPFQQF        | 553  |
| 1073280 | TESNKKFLPFQQFGR      | 553  |
| 1397507 | TFEYVSQPF            | 167  |
| 1333951 | TFEYVSQPFLM          | 167  |
| 1310841 | TFKCYGVSPKLNLDL      | 376  |
| 1542737 | TFKCYGVSPKLNLDLCFTNV | 376  |
| 1394092 | TFLLKYNENGTITDAVD    | 274  |

|         |                       |      |
|---------|-----------------------|------|
| 1621279 | TFLLYNENGTITDAVDC     | 274  |
| 63951   | TGRLQSLQTYVTQQL       | 998  |
| 1394094 | TGSNVFQTRAGCLIGAE     | 638  |
| 1621375 | TGSNVFQTRAGCLIGAEH    | 638  |
| 1394095 | TGTGVLTESNKKFLPFQ     | 547  |
| 1621380 | TGTGVLTESNKKFLPFQQ    | 547  |
| 1313741 | TGVLTESNKKFLPFQ       | 549  |
| 1394096 | THWFVTQRNFYEPQIIT     | 1100 |
| 1621419 | THWFVTQRNFYEPQIITT    | 1100 |
| 1597376 | TIADYNYKL             | 417  |
| 1073433 | TIMLCCMTSCCSCLK       | 1231 |
| 1310847 | TITSGWTFGAGAALQ       | 881  |
| 1073438 | TKLNDLCFTNVYADS       | 385  |
| 1310848 | TKRFDNPVLPFNDGV       | 76   |
| 1325536 | TLADAGFIK             | 827  |
| 1394099 | TLADAGFIKQYGDCLGD     | 827  |
| 1621584 | TLADAGFIKQYGDCLGDI    | 827  |
| 1075075 | TLDSKTQSL             | 109  |
| 1313752 | TLDSKTQSLLVNNA        | 109  |
| 1310850 | TLEILDITPCSFQGV       | 581  |
| 1313756 | TLKSFTVEK             | 302  |
| 1330211 | TLKSFTVEKGIYQTSNF     | 302  |
| 1621623 | TLKSFTVEKGIYQTSNFR    | 302  |
| 1075077 | 3DSSSGWTAGAAAYVGYL    | 240  |
| 1310852 | TLVKQLSSNFGAISS       | 961  |
| 1310854 | TMSLGAENSVAYSNN       | 696  |
| 1310855 | TNFTISVTTEILPVS       | 716  |
| 1313767 | TNGTKRFDNPVLPFN       | 73   |
| 1313768 | TNLCPFGEVFNATRF       | 333  |
| 1310857 | TNLVKNKCVNFNFN        | 531  |
| 1313769 | TNSFTRGVYYPDKVF       | 29   |
| 1394101 | TNSFTRGVYYPDKVFRS     | 29   |
| 1621710 | TNSFTRGVYYPDKVFRSS    | 29   |
| 1313770 | TNVYADSFVIRGDEV       | 393  |
| 1394102 | TNVYADSFVIRGDEVQR     | 393  |
| 1087748 | TNVYADSFVIRGDEVQRQI   | 393  |
| 1325795 | TPCSFGGVSV            | 588  |
| 1075079 | TPINLVRDL             | 208  |
| 1310860 | TPPIKDFGGFNFSQI       | 791  |
| 1330227 | TQDLFLPFF             | 51   |
| 1310861 | TQDLFLPFFSNVTWF       | 51   |
| 1330231 | TQEVFAQVKQIYKTPPI     | 778  |
| 1621919 | TQEVFAQVKQIYKTPPIK    | 778  |
| 1087411 | TQLNRALTGI            | 761  |
| 1310863 | TQLNRALTGIAVEQD       | 761  |
| 1518044 | TQLNRALTGIAVEQDKNTQ   | 761  |
| 1518045 | 2QLNRALTGIAVEQDKNTQEV | 761  |
| 1394103 | TQLPPAYTNSFTRGVYY     | 22   |
| 1621943 | TQLPPAYTNSFTRGVYYP    | 22   |
| 65906   | TQNVLYENQK            | 912  |
| 534141  | TQQLIRAAEIRASAN       | 1009 |
| 1394104 | TQQLIRAAEIRASANLA     | 1009 |

|         |                     |      |
|---------|---------------------|------|
| 1087755 | TQQLIRAAEIRASANLAA  | 1009 |
| 1073475 | TQRNFYEPQIITTDN     | 1105 |
| 1310864 | TQTNSPRRARSVASQ     | 676  |
| 1313795 | TRAGCLIGAEHVNNS     | 645  |
| 1394105 | TRAGCLIGAEHVNNSYE   | 645  |
| 1621969 | TRAGCLIGAEHVNNSYEC  | 645  |
| 1334060 | TRFASVYAW           | 345  |
| 1313796 | TRFASVYAWNRKRIS     | 345  |
| 1518321 | TRFASVYAWNRKRISNCVA | 345  |
| 1518322 | SVYAWNRKRISNCVADYSV | 345  |
| 1310865 | TRFQTLALHRSYLT      | 236  |
| 1313797 | TRGVYYPDKVFRSSV     | 33   |
| 1334061 | TRTQLPPAY           | 20   |
| 1394106 | TSGWTFGAGAALQIPFA   | 883  |
| 1622060 | TSGWTFGAGAALQIPFAM  | 883  |
| 1397216 | TSNFRVQPTESIVRF     | 315  |
| 1087414 | TSNQVAVLY           | 604  |
| 1310870 | TTAPAICHGKAHFP      | 1076 |
| 1310871 | TTDNTFVSGNCDVVI     | 1116 |
| 1700707 | TTRTQLPPA           | 19   |
| 1075085 | TVYDPLQPELDSFK      | 1136 |
| 1310874 | TVYDPLQPELDSFKE     | 1136 |
| 1330639 | TYVPAQEKNF          | 1066 |
| 1334122 | TYVPAQEKNFT         | 1066 |
| 1310875 | TYVPAQEKNFTTAPA     | 1066 |
| 1310876 | TYVTQQLIRAAEIRA     | 1006 |
| 1392485 | VADYSVLYNSASFST     | 362  |
| 1326246 | VAIHADQLTPTW        | 622  |
| 534192  | VAKNLNESLIDLQEL     | 1189 |
| 1326261 | VASQSIIAY           | 687  |
| 1394111 | VASQSIIAYTMSLGAEN   | 687  |
| 1622559 | VASQSIIAYTMSLGAENS  | 687  |
| 1313836 | VAYSNNIAIPTNFT      | 705  |
| 1313838 | VDCALDPLSETKCTL     | 289  |
| 1310877 | VDCTMYICGDSTECS     | 736  |
| 1394114 | VDCTMYICGDSTECSNL   | 736  |
| 1622602 | VDCTMYICGDSTECSNLL  | 736  |
| 1075088 | VEAEVQIDRLITGR      | 987  |
| 1397221 | VEGFNCYFPLQSYGFQPT  | 483  |
| 1326322 | VFAQVKQIY           | 781  |
| 1310884 | VFAQVKQIYKTPPIK     | 781  |
| 1326409 | VFKNIDGYF           | 193  |
| 1313847 | VFKNIDGYFKIYSKH     | 193  |
| 1310885 | VFLHVTYVPAQEKNF     | 1061 |
| 1310886 | VFNATRFASVYAWNR     | 341  |
| 1334171 | VFVSNGTHW           | 1094 |
| 1326455 | VFVSNGTHWF          | 1094 |
| 1326471 | VGGNYNYLY           | 445  |
| 1073698 | VGGNYNYLYRLFRKS     | 445  |
| 1330284 | VGGNYNYLYRLFRKSNLKP | 445  |
| 1334183 | VGYLQPRTFL          | 267  |
| 1394118 | VGYLQPRTFLLKYNENG   | 267  |

|         |                      |      |
|---------|----------------------|------|
| 1623020 | VGYLQPRTFLLKYNENGT   | 267  |
| 1334184 | VGYPYRVV             | 503  |
| 1313864 | VIAWNSNLDKSVGG       | 433  |
| 1313865 | VIGIVNNTVYDPLQP      | 1129 |
| 1394119 | VIKVCEFQFCNDPFLGV    | 127  |
| 1623119 | VIKVCEFQFCNDPFLGVY   | 127  |
| 1310891 | VIRGDEVRQIAPGQT      | 401  |
| 1313871 | VITPGTNTSNQVAVL      | 597  |
| 1313875 | VKQIYKTPPIKDFGG      | 785  |
| 1394123 | VKQIYKTPPIKDFGGFN    | 785  |
| 1087780 | VKQIYKTPPIKDFGGFN    | 785  |
| 1313879 | VLGQSKRVDFCGKGY      | 1033 |
| 1310896 | VLKGVKLHY            | 1264 |
| 1310899 | VLLPLVSSQCVNLTT      | 6    |
| 69657   | VLNDILSRL            | 976  |
| 1310902 | VLNDILSRLDKVEAE      | 976  |
| 1334231 | VLPFNDGVYFA          | 83   |
| 1075093 | VLPFNDGVYFASTEK      | 83   |
| 1075094 | VLPPLLTDEMIAQYT      | 860  |
| 1394127 | VLSFELLHAPATVCGPK    | 512  |
| 1623349 | VLSFELLHAPATVCGPKK   | 512  |
| 1334234 | VLTESNKKF            | 551  |
| 1310904 | VLTESNKKFLPFQQF      | 551  |
| 1555419 | VLYENQKLI            | 915  |
| 1394130 | VLYQDVNCTEVPVAIHA    | 610  |
| 1623361 | VLYQDVNCTEVPVAIHAD   | 610  |
| 1075096 | VVAIHADQLTPTWRVYSTGS | 610  |
| 1073912 | VNIQKEIDRLNEVAK      | 1177 |
| 1394133 | VNIQKEIDRLNEVAKNL    | 1177 |
| 1087783 | VNIQKEIDRLNEVAKNLN   | 1177 |
| 1310909 | VNLTRTQLPPAYTN       | 16   |
| 1394134 | VNNATNVVIKVCEFQFC    | 120  |
| 1623423 | VNNATNVVIKVCEFQFCN   | 120  |
| 1310910 | VNNSYECDIPIGAGI      | 656  |
| 1313901 | VNNTVYDPLQPELDS      | 1133 |
| 1073938 | VQIDRLITGRLQSLQ      | 991  |
| 1075108 | VQPTESIVRFPNITNLCPF  | 320  |
| 1313917 | VRDLPQGFSALEPLV      | 213  |
| 1310916 | VRDPQTLILDITPC       | 576  |
| 70718   | VRFNITNL             | 327  |
| 1394138 | VRQIAPGQTGKIADYNY    | 407  |
| 1623821 | VRQIAPGQTGKIADYNYK   | 407  |
| 1313921 | VSMTKTSVDCTMYIC      | 729  |
| 1394143 | VSMTKTSVDCTMYICGD    | 729  |
| 1087786 | VSMTKTSVDCTMYICGDS   | 729  |
| 1310921 | VSNGTHWFVTQRNFY      | 1096 |
| 1310922 | VSQPFLMDLEGKQGN      | 171  |
| 1310923 | VSSQCVNLTRTQLP       | 11   |
| 1706303 | VTLADAGFIK           | 826  |
| 1310925 | VTLADAGFIKQYGDC      | 826  |
| 1310927 | VTQNVLYENQKLIAN      | 911  |
| 1394146 | VTQNVLYENQKLIANQF    | 911  |

|         |                      |      |
|---------|----------------------|------|
| 1330323 | VTQNVLYENQKLIANQFN   | 911  |
| 1394147 | VTTEILPVSMTKTSVDC    | 722  |
| 1624131 | VTTEILPVSMTKTSVDCT   | 722  |
| 1597845 | VTWFHAIHV            | 62   |
| 1310928 | VTYVPAQEK            | 1065 |
| 1313930 | VTYVPAQEKNFTTAP      | 1065 |
| 1394148 | VTYVPAQEKNFTTAPAI    | 1065 |
| 1087787 | VTYVPAQEKNFTTAPAIC   | 1065 |
| 71663   | VVFLHVTVV            | 1060 |
| 1394149 | VVIGIVNNTVYDPLQPE    | 1128 |
| 1624207 | VVIGIVNNTVYDPLQPEL   | 1128 |
| 1310930 | VVIKVFCEFCNDPF       | 126  |
| 1073956 | VVLSFELLHAPATVC      | 511  |
| 1310931 | VVNIQKEIDRLNEVA      | 1176 |
| 1310932 | VVNQNAQALNTLVKQ      | 951  |
| 1311525 | VYAWNRKRI            | 350  |
| 1543315 | VYAWNRKRIS           | 350  |
| 71996   | VYDPLQPEL            | 1137 |
| 1327418 | VYDPLQPELDSF         | 1137 |
| 1313938 | VYDPLQPELDSFKEE      | 1137 |
| 1327695 | VYSSANNCTF           | 159  |
| 1075111 | VYSSANNCTFEY         | 159  |
| 1313944 | VYSTGSNVF            | 635  |
| 1075112 | VYSTGSNVFQTR         | 635  |
| 1327741 | VYYPDKVF             | 36   |
| 1625462 | VYYPDKVFR            | 36   |
| 1075113 | VYYPDKVFRSSVLH       | 36   |
| 1310935 | VYYPDKVFRSSVLHS      | 36   |
| 1394152 | VYYPDKVFRSSVLHSTQ    | 36   |
| 1624375 | VYYPDKVFRSSVLHSTQD   | 36   |
| 1394153 | WFHAIHVSGTNGTKRFD    | 64   |
| 1624434 | WFHAIHVSGTNGTKRFDN   | 64   |
| 1327761 | WFVTQRNFY            | 1102 |
| 1075116 | WIFGTTLDSK           | 104  |
| 72717   | WLGFIAGLIAIVMT       | 1217 |
| 1313960 | WNRKRISNCVADYSV      | 353  |
| 1532692 | WNRKRISNCVADYSVLYNS  | 353  |
| 1310945 | WNSNNLDSKVGGNYN      | 436  |
| 1543369 | WNSNNLDSKVGGNYNYLYR  | 436  |
| 1394157 | WPWYIWLGFIAGLIAIV    | 1212 |
| 1624516 | WPWYIWLGFIAGLIAIVM   | 1212 |
| 1313967 | WRVYSTGSNVFQTRA      | 633  |
| 1327824 | WTAGAAAYY            | 258  |
| 1075117 | WTAGAAAYYVGY         | 258  |
| 1327836 | WTFGAGAAL            | 886  |
| 1310947 | WTFGAGAALQIPFAM      | 886  |
| 1310948 | YADSFVIRGDEVRQI      | 396  |
| 1543393 | YADSFVIRGDEVRQIAPGQT | 396  |
| 1327895 | YAWNRKRI             | 351  |
| 1309143 | YAWNRKRISNCVADY      | 351  |
| 1394158 | YAWNRKRISNCVADYSV    | 351  |
| 1624638 | YAWNRKRISNCVADYSVL   | 351  |



|         |                      |      |
|---------|----------------------|------|
| 1075118 | /ADYSVLYNSASFSTFKCYG | 351  |
| 1327917 | YECDIPIGAGI          | 660  |
| 1327923 | YENQKLIANQF          | 917  |
| 1313987 | YENQKLIANQFNSAI      | 917  |
| 1330361 | YENQKLIANQFNSAIGKIQ  | 917  |
| 1311601 | YEQYIKWPW            | 1206 |
| 1075120 | YEQYIKWPWYI          | 1206 |
| 1309144 | YEQYIKWPWYIWLGF      | 1206 |
| 1074069 | YFASTEKSNIIRGWI      | 91   |
| 1075121 | YFPLQSYGF            | 489  |
| 1313990 | YFPLQSYGFQPTNGV      | 489  |
| 1346790 | YFQPRTFLL            |      |
| 1313992 | YGDCLGDIAARDLIC      | 837  |
| 1328001 | YGFQPTNGV            | 495  |
| 1310955 | YGSFCTQLNRALTGI      | 756  |
| 1313994 | YHKNNKSWMESEFRV      | 145  |
| 1075122 | YHLMSFPQSA           | 1047 |
| 1310956 | YICGDSTECSNLLLQ      | 741  |
| 1314002 | YIKWPWYIWLGFIAAG     | 1209 |
| 1314005 | YKTPPIKDFGGFNFS      | 789  |
| 1593848 | YLQLRTFLL            |      |
| 1593850 | YLQPRIFLL            |      |
| 1309147 | YLQPRTFLL            | 269  |
| 1314014 | YLQPRTFLLKYNENG      | 269  |
| 1593851 | YLQPSTFLL            |      |
| 1074201 | YLYRLFRKSNLKPFE      | 451  |
| 1397512 | YNSASFSTF            | 369  |
| 1314022 | YNSASFSTFKCYGVS      | 369  |
| 1074214 | YNYKLPDDFTGCVIA      | 421  |
| 1394168 | YNYKLPDDFTGCVIAWN    | 421  |
| 1624985 | YNYKLPDDFTGCVIAWNS   | 421  |
| 1328431 | YNYLYRLFR            | 449  |
| 1314023 | YNYLYRLFRKSNLKP      | 449  |
| 1330382 | YNYLYRLFRKSNLKPFE    | 449  |
| 1087807 | YNYLYRLFRKSNLKPFER   | 449  |
| 1314028 | YQAGSTPCNGVEGFN      | 473  |
| 1328471 | YQDVNCTEV            | 612  |
| 1334394 | YQPYRVVVL            | 505  |
| 1314034 | YQPYRVVVL SFELLH     | 505  |
| 1394171 | YQPYRVVVL SFELLHAP   | 505  |
| 1087809 | YQPYRVVVL SFELLHAPA  | 505  |
| 1314036 | YQTSNFRVQPTESIV      | 313  |
| 1537200 | YQTSNFRVQPTESIVRFPN  | 313  |
| 1394173 | YRFNGIGVTQNVLYENQ    | 904  |
| 1625097 | YRFNGIGVTQNVLYENQK   | 904  |
| 1314038 | YRLFRKSNLKPFERD      | 453  |
| 1394175 | YSKHTPINLVRDLPQGF    | 204  |
| 1625152 | YSKHTPINLVRDLPQGFS   | 204  |
| 1310978 | YSTGSNVFQTRAGCL      | 636  |
| 1075125 | YSVLYNSASFSTFK       | 365  |
| 1314047 | YSVLYNSASFSTFKC      | 365  |
| 1394178 | YSVLYNSASFSTFKCYG    | 365  |

|         |                            |     |
|---------|----------------------------|-----|
| 1625177 | Y <b>SVLYNSASFSTFKCYGV</b> | 365 |
| 1328800 | YTMSLGAENSVAY              | 695 |
| 1328804 | YTNSFTRGVY                 | 28  |
| 1334416 | YTNSFTRGVYY                | 28  |
| 1314060 | YTSALLAGTITSGWT            | 873 |
| 1310979 | YVGYLQPRTFLLKYN            | 266 |
| 1328953 | <b>YYHKNNKSW</b>           | 144 |
| 1074296 | YYPDKVFRSSVLHST            | 37  |
| 1711597 | YYVGYLQPR                  | 265 |
| 1329031 | YYVGYLQPRTF                | 265 |
| 1075131 | YYVGYLQPRTFLL              | 265 |
| 1314078 | YYVGYLQPRTFLLKY            | 265 |

Note: The epitopes mutated in Omicron variant versus Wuhan-1 are indicated in red.
